# Supplementary material for: Supramolecular catalysis in the methylation of meta-phenylene ethynylene foldamer containing N,N-dimethylaminopyridine
Source: Royal Society of Chemistry journal article supplement (doi:10.1039/c7ra00710h), 2017-01-01
Supplement: c7ra00710h1.pdf [file c7ra00710h1.pdf]

## Electronic supplementary information (ESI)

### Supramolecular Catalysis in the Methylation of *meta*-Phenylene Ethynylene Foldamer Containing *N,N*-Dimethylaminopyridine

*Lina Xu*<sup>†\*</sup>, *Guoyong Fang*<sup>†</sup>, and *Shuhua Li*<sup>‡\*</sup>

<sup>†</sup>Key Laboratory of Carbon Materials of Zhejiang Province, College of Chemistry and Materials Engineering, Wenzhou University, Wenzhou 325035, China. Email: [xulina@wzu.edu.cn](mailto:xulina@wzu.edu.cn)

<sup>‡</sup>Institute of Theoretical and Computational Chemistry, Key Laboratory of Mesoscopic Chemistry of Ministry of Education, School of Chemistry and Chemical Engineering, Nanjing University, Nanjing 210093, China. Email: [shuhua@nju.edu.cn](mailto:shuhua@nju.edu.cn)

**Figure S1.** Optimized structures of DMAP-modified *m*PE foldamers with 7-17 monomer

units.....S2

**Table S1.** The absolute free energies of all stationary points in methylation reactions of DMAP-modified foldamer **1** and trimer **1'** with methyl sulfonate esters **2a-2h**.....S3

**Table S2.** The atom coordinates of all stationary points in methylation reactions of DMAP-modified foldamer **1** and trimer **1'** with methyl sulfonate esters **2a-2h**.....S5

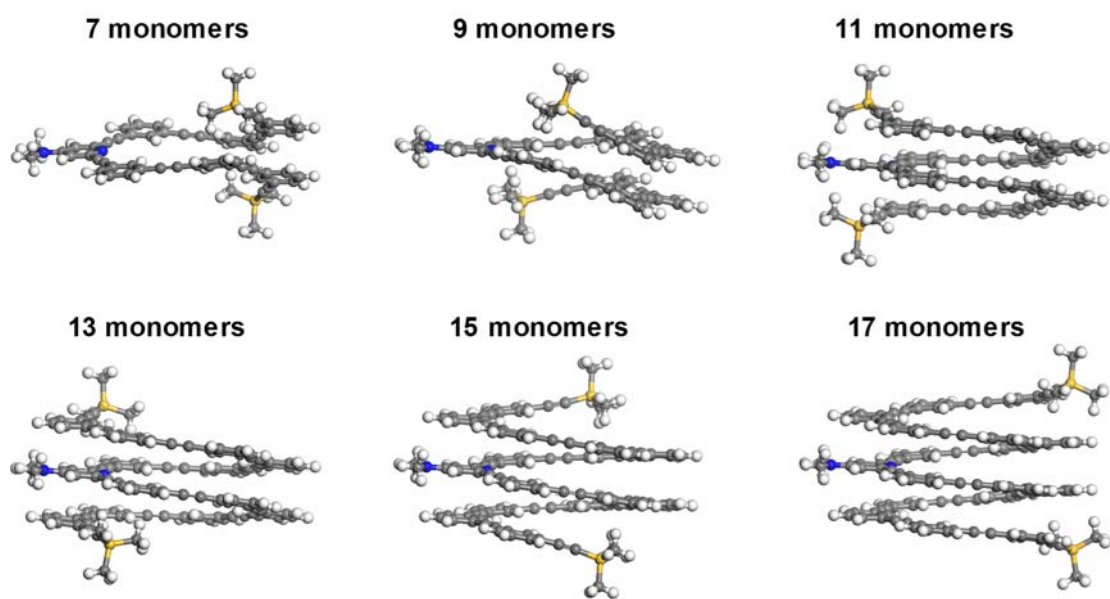

**Figure S1.** Optimized structures of DMAP-modified *m*PE foldamers with 7, 9, 11, 13, 15, and 17 monomer units.

**Table S1.** The absolute free energies of all stationary points in methylation reactions of DMAP-modified foldamer **1** and trimer **1'** with methyl sulfonate esters **2a-2h**.

| Structure | G (Hartree)  | Structure      | G(Hartree)   |
|-----------|--------------|----------------|--------------|
| 2a        | -703.402014  | 1 (13 monomer) | -5035.392477 |
| 3a        | -5738.789734 |                |              |
| TS-a      | -5738.751932 |                |              |
| 4a        | -5738.806610 |                |              |
| 5a        | -663.712884  | 6              | -5075.099942 |
| 2b        | -781.941030  | 1 (13 monomer) | -5035.392477 |
| 3b        | -5817.326831 |                |              |
| TS-b      | -5817.291206 |                |              |
| 4b        | -5817.347909 |                |              |
| 5b        | -742.252393  | 6              | -5075.099942 |
| 2c        | -860.478431  | 1 (13 monomer) | -5035.392477 |
| 3c        | -5895.862795 |                |              |
| TS-c      | -5895.828611 |                |              |
| 4c        | -5895.888045 |                |              |
| 5c        | -820.788992  | 6              | -5075.099942 |
| 2d        | -939.014976  | 1 (13 monomer) | -5035.392477 |
| 3d        | -5974.402161 |                |              |
| TS-d      | -5974.369665 |                |              |
| 4d        | -5974.423484 |                |              |
| 5d        | -899.325441  | 6              | -5075.099942 |
| 2e        | -781.944623  | 1 (13 monomer) | -5035.392477 |
| 3e        | -5817.331348 |                |              |
| TS-e      | -5817.294885 |                |              |
| 4e        | -5817.353127 |                |              |
| 5e        | -742.255719  | 6              | -5075.099942 |
| 2f        | -860.478505  | 1 (13 monomer) | -5035.392477 |
| 3f        | -5895.868733 |                |              |
| TS-f      | -5895.831861 |                |              |
| 4f        | -5895.887966 |                |              |
| 5f        | -820.788651  | 6              | -5075.099942 |
| 2g        | -939.015298  | 1 (13 monomer) | -5035.392477 |
| 3g        | -5974.408741 |                |              |
| TS-g      | -5974.368660 |                |              |
| 4g        | -5974.423613 |                |              |
| 5g        | -899.325756  | 6              | -5075.099942 |
| 2h        | -1017.552222 | 1 (13 monomer) | -5035.392477 |
| 3h        | -6052.944188 |                |              |
| TS-h      | -6052.905975 |                |              |
| 4h        | -6052.961137 |                |              |
| 5h        | -977.862053  | 6              | -5075.099942 |
| 2a'       | -703.402014  | 1'(trimer)     | -995.997614  |
| 3a'       | -1699.389359 |                |              |
| TS-a'     | -1699.352450 |                |              |
| 4a'       | -1699.406310 |                |              |

|       |              |                |              |
|-------|--------------|----------------|--------------|
| 5a'   | -663.712884  | 6'             | -1035.699567 |
| 2b'   | -781.941030  | 1'(trimer)     | -995.997614  |
| 3b'   | -1777.925505 |                |              |
| TS-b' | -1777.891435 |                |              |
| 4b'   | -1777.944038 |                |              |
| 5b'   | -742.252393  | 6'             | -1035.699567 |
| 2c'   | -860.478431  | 1'(trimer)     | -995.997614  |
| 3c'   | -1856.465917 |                |              |
| TS-c' | -1856.425592 |                |              |
| 4c'   | -1856.483805 |                |              |
| 5c'   | -820.788992  | 6'             | -1035.699567 |
| 2d'   | -939.014976  | 1'(trimer)     | -995.997614  |
| 3d'   | -1935.001073 |                |              |
| TS-d' | -1934.963813 |                |              |
| 4d'   | -1935.018041 |                |              |
| 5d'   | -899.325441  | 6'             | -1035.699567 |
| 2e'   | -781.944623  | 1'(trimer)     | -995.997614  |
| 3e'   | -1777.930666 |                |              |
| TS-e' | -1777.892074 |                |              |
| 4e'   | -1777.946061 |                |              |
| 5e'   | -742.255719  | 6'             | -1035.699567 |
| 2f'   | -860.478505  | 1'(trimer)     | -995.997614  |
| 3f'   | -1856.466989 |                |              |
| TS-f' | -1856.428134 |                |              |
| 4f'   | -1856.480621 |                |              |
| 5f'   | -820.788651  | 6'             | -1035.699567 |
| 2g'   | -939.015298  | 1'(trimer)     | -995.997614  |
| 3g'   | -1935.00336  |                |              |
| TS-g' | -1934.963664 |                |              |
| 4g'   | -1935.014344 |                |              |
| 5g'   | -899.325756  | 6'             | -1035.699567 |
| 2h'   | -1017.552222 | 1'(trimer)     | -995.997614  |
| 3h'   | -2013.54089  |                |              |
| TS-h' | -2013.502122 |                |              |
| 4h'   | -2013.556689 |                |              |
| 5h'   | -977.862053  | 6'             | -1035.699567 |
| 2a    | -703.402014  | 1 (15 monomer) | -5649.422914 |
| 3a    | -6352.823352 |                |              |
| TS-a  | -6352.783888 |                |              |
| 4a    | -6352.845603 |                |              |
| 5a    | -663.712884  | 6              | -5689.131902 |
| 2a    | -703.402014  | 1 (17 monomer) | -6263.454097 |
| 3a    | -6966.849861 |                |              |
| TS-a  | -6966.816914 |                |              |
| 4a    | -6966.874153 |                |              |
| 5a    | -663.712884  | 6              | -6303.165033 |

**Table S2.** The atom coordinates of all stationary points in methylation reactions of DMAP-modified foldamer **1** (13, 15, and 17 monomers) and trimer **1'** with methyl sulfonate esters **2a-2h**.

| Structure | Atom        | x, y, and z |              |             |
|-----------|-------------|-------------|--------------|-------------|
| 3a        | O           | -0.41828500 | -5.33888600  | -1.02866800 |
|           | C           | -0.32153200 | -3.93282200  | -0.67673100 |
|           | H           | 0.15149600  | -3.80857000  | 0.29981300  |
|           | H           | 0.31197400  | -3.49101700  | -1.44343700 |
|           | H           | -1.30860700 | -3.46982200  | -0.68434200 |
|           | N           | -0.03682700 | -0.97063900  | -0.20810400 |
|           | S           | -1.34399800 | -6.28005800  | -0.12754400 |
|           | O           | -1.53956000 | -7.48430100  | -0.91643100 |
|           | O           | -2.50449200 | -5.52566900  | 0.32747300  |
|           | C           | -0.31225700 | -6.64963300  | 1.26636800  |
|           | H           | -0.07810900 | -5.72444700  | 1.79337200  |
|           | H           | 0.59115000  | -7.13712100  | 0.90180600  |
|           | H           | -0.88145100 | -7.31805400  | 1.91353500  |
|           | C           | 1.13300300  | -0.33189100  | -0.04530000 |
|           | C           | 1.29646300  | 1.04998000   | -0.08317900 |
|           | H           | 2.28632100  | 1.46382500   | 0.05819300  |
|           | C           | 0.16918800  | 1.87303900   | -0.28057700 |
|           | N           | 0.26734600  | 3.22850200   | -0.31647000 |
|           | C           | -1.06551000 | 1.21273800   | -0.44174200 |
|           | H           | -1.98621900 | 1.75494700   | -0.61239900 |
|           | C           | -1.10220300 | -0.17828400  | -0.40978000 |
|           | C           | 1.57313100  | 3.85871800   | -0.26593800 |
|           | C           | -0.93695500 | 4.03394900   | -0.39580200 |
|           | H           | 1.45125600  | 4.93671800   | -0.35994400 |
|           | H           | 2.20990200  | 3.51135200   | -1.08823000 |
|           | H           | 2.08708700  | 3.64915000   | 0.68022400  |
|           | H           | -1.48422700 | 3.84877900   | -1.32809100 |
|           | H           | -0.66395600 | 5.08737400   | -0.36100600 |
|           | H           | -1.60814600 | 3.82190100   | 0.44521200  |
|           | C           | -1.46979100 | -14.24014500 | 1.58778800  |
|           | C           | -2.52307500 | -13.33832800 | 1.68353800  |
|           | C           | -2.26973200 | -11.95715100 | 1.66883000  |
|           | C           | 0.10452400  | -12.40993800 | 1.44988100  |
|           | C           | -0.15933300 | -13.78672800 | 1.47444700  |
|           | H           | -1.67132000 | -15.30623700 | 1.59904200  |
|           | C           | -3.34535800 | -11.01867200 | 1.78219600  |
|           | C           | -4.25394500 | -10.22242700 | 1.87860300  |
|           | C           | -7.71298100 | -8.86716300  | 2.18272800  |
|           | C           | -7.46974400 | -7.49994400  | 2.22293800  |
|           | C           | -6.15344900 | -7.01685800  | 2.14716500  |
| C         | -5.33923100 | -9.29472100 | 1.98812200   |             |
| C         | -6.65774400 | -9.76582900 | 2.06960300   |             |
| H         | -8.73177700 | -9.23632600 | 2.23795900   |             |
| C         | -5.90867200 | -5.60724500 | 2.20116700   |             |

|   |             |              |            |
|---|-------------|--------------|------------|
| C | -5.72565000 | -4.41033500  | 2.24881100 |
| C | -6.50837300 | -0.76969600  | 2.33175700 |
| C | -5.24035900 | -0.21712300  | 2.46417700 |
| C | -4.11169500 | -1.05057300  | 2.52305800 |
| C | -5.54956000 | -2.99096800  | 2.31463000 |
| C | -6.66972600 | -2.14858600  | 2.26008000 |
| H | -7.37720300 | -0.12176900  | 2.28375000 |
| C | 2.29246900  | -1.15540200  | 0.18214800 |
| C | 3.26988600  | -1.84226900  | 0.38411800 |
| C | 6.83393600  | -2.81425400  | 0.87953500 |
| C | 6.74308300  | -4.20029900  | 0.89927800 |
| C | 5.49268700  | -4.82587700  | 0.76729600 |
| C | 4.43757800  | -2.64955500  | 0.57464500 |
| C | 5.69109000  | -2.03613200  | 0.72256300 |
| H | 7.80282200  | -2.33641800  | 0.98445700 |
| C | 5.40000800  | -6.25358900  | 0.81917700 |
| C | 5.34022800  | -7.46249300  | 0.87886000 |
| C | 6.27486000  | -11.07429600 | 1.03186900 |
| C | 5.02393100  | -11.67373200 | 1.12269300 |
| C | 3.86646100  | -10.88025300 | 1.13829800 |
| C | 5.24217100  | -8.88881700  | 0.96000600 |
| C | 6.39249200  | -9.69042300  | 0.95241800 |
| H | 7.16724400  | -11.69106800 | 1.01873500 |
| C | 1.44382500  | -11.91771900 | 1.33357400 |
| C | 2.56496300  | -11.46733000 | 1.24136800 |
| C | -0.95510700 | -11.49943500 | 1.54469500 |
| C | -5.09079700 | -7.91680100  | 2.02204100 |
| C | -4.26976600 | -2.43751700  | 2.43884900 |
| C | 4.34275300  | -4.04654000  | 0.59760100 |
| C | 3.98208300  | -9.48976700  | 1.05129600 |
| H | -3.54506900 | -13.69069100 | 1.77417200 |
| H | 0.66395000  | -14.48878000 | 1.39500900 |
| H | -8.28870800 | -6.79461300  | 2.31528000 |
| H | -6.84300800 | -10.83408100 | 2.03348300 |
| H | -5.10939900 | 0.85796200   | 2.52608300 |
| H | -7.65680100 | -2.58554100  | 2.15386600 |
| H | 7.63119600  | -4.81038600  | 1.02499700 |
| H | 5.75590300  | -0.95290700  | 0.69739000 |
| H | 4.93126100  | -12.75269200 | 1.18550700 |
| H | 7.36771100  | -9.22242600  | 0.87233800 |
| H | -0.75533600 | -10.43334300 | 1.51565500 |
| H | -4.07460200 | -7.54346000  | 1.94302200 |
| H | -3.39991500 | -3.08570400  | 2.46074900 |
| H | 3.37567100  | -4.52491300  | 0.47961200 |
| H | 3.08944800  | -8.87371500  | 1.05133600 |
| C | 0.80378100  | 2.77724000   | 2.97171100 |
| C | -1.72295800 | 0.04806600   | 2.79812400 |
| C | -2.80979000 | -0.47263200  | 2.66940900 |
| C | 1.96932600  | 2.06187400   | 3.22663700 |

|    |             |              |             |
|----|-------------|--------------|-------------|
| C  | 1.92424000  | 0.66490700   | 3.35629900  |
| C  | -0.46451000 | 0.71586300   | 2.94128700  |
| C  | -0.40937800 | 2.11444900   | 2.83612900  |
| H  | 0.84056000  | 3.85854700   | 2.88273800  |
| C  | 0.70570200  | -0.00579100  | 3.20252400  |
| H  | 2.91775900  | 2.57571100   | 3.34431400  |
| H  | -1.32372500 | 2.66617000   | 2.64199200  |
| H  | 0.66728100  | -1.08648700  | 3.29023900  |
| C  | 3.11521300  | -0.06137900  | 3.69511100  |
| C  | 4.12257800  | -0.65534800  | 4.03705800  |
| Si | 5.61092500  | -1.55115500  | 4.67935800  |
| C  | 7.15133500  | -0.77438100  | 3.93870900  |
| C  | 5.44308100  | -3.36816600  | 4.25128400  |
| C  | 5.64459600  | -1.33183100  | 6.54559100  |
| H  | 7.27575100  | 0.24828700   | 4.30649000  |
| H  | 7.10847900  | -0.74366700  | 2.84807500  |
| H  | 8.03656600  | -1.34905000  | 4.22951600  |
| H  | 5.25335600  | -3.51299800  | 3.18465200  |
| H  | 4.61712800  | -3.81618900  | 4.81234500  |
| H  | 6.36117300  | -3.90527100  | 4.51132400  |
| H  | 4.74606900  | -1.74818400  | 7.00941700  |
| H  | 5.71334700  | -0.27472200  | 6.81701700  |
| H  | 6.51414200  | -1.84705400  | 6.96655800  |
| C  | -0.01907100 | -14.25880300 | -1.90741700 |
| C  | 1.16598800  | -13.53988200 | -2.00555500 |
| C  | 1.13960600  | -12.13633300 | -1.98616400 |
| C  | -1.27478500 | -12.19675200 | -1.76080000 |
| C  | -1.23745100 | -13.59810900 | -1.78820800 |
| H  | 0.00615100  | -15.34339100 | -1.92082600 |
| C  | 2.35370300  | -11.38524700 | -2.09303500 |
| C  | 3.37595700  | -10.74072800 | -2.18226800 |
| C  | 6.97991700  | -9.80027300  | -2.42476300 |
| C  | 6.89433400  | -8.41413300  | -2.47888300 |
| C  | 5.63929900  | -7.78596500  | -2.44398100 |
| C  | 4.57078100  | -9.95841200  | -2.28436100 |
| C  | 5.82884300  | -10.57565100 | -2.32967000 |
| H  | 7.95219800  | -10.28122600 | -2.45214500 |
| C  | 5.53903400  | -6.35901000  | -2.50850700 |
| C  | 5.44957300  | -5.15181100  | -2.56642400 |
| C  | 6.44439300  | -1.56030800  | -2.58475800 |
| C  | 5.21611900  | -0.93685700  | -2.76224700 |
| C  | 4.04559700  | -1.70438600  | -2.88193700 |
| C  | 5.36361900  | -3.72383200  | -2.63189700 |
| C  | 6.52588200  | -2.94707800  | -2.52126600 |
| H  | 7.34500400  | -0.96228700  | -2.49264900 |
| C  | -2.36566400 | -0.83978600  | -0.60753400 |
| C  | -3.43825200 | -1.38514700  | -0.75056700 |
| C  | -7.11088500 | -1.91147800  | -1.14006400 |
| C  | -7.18619300 | -3.29921500  | -1.17186400 |

|    |             |              |             |
|----|-------------|--------------|-------------|
| C  | -6.01494700 | -4.06742600  | -1.07861600 |
| C  | -4.70547300 | -2.03340300  | -0.90900300 |
| C  | -5.88023500 | -1.27397500  | -1.01275900 |
| H  | -8.01888900 | -1.32098100  | -1.21086100 |
| C  | -6.06571300 | -5.49706200  | -1.13134900 |
| C  | -6.07133900 | -6.70761400  | -1.18524500 |
| C  | -7.23398600 | -10.25299300 | -1.27618700 |
| C  | -6.02475400 | -10.93024400 | -1.37561700 |
| C  | -4.81805600 | -10.21291900 | -1.41942700 |
| C  | -6.05936800 | -8.13799400  | -1.25054100 |
| C  | -7.25939500 | -8.86327100  | -1.21654700 |
| H  | -8.16396600 | -10.81164500 | -1.24168500 |
| C  | -2.52154800 | -11.50398300 | -1.63733600 |
| C  | -3.57124300 | -10.90748900 | -1.53360700 |
| C  | -0.08247500 | -11.46962100 | -1.85761700 |
| C  | 4.48156500  | -8.56262600  | -2.34181500 |
| C  | 4.12307500  | -3.09806500  | -2.80971900 |
| C  | -4.77649200 | -3.43087600  | -0.93840900 |
| C  | -4.83769400 | -8.81618800  | -1.34924100 |
| H  | 2.11746100  | -14.05224100 | -2.10043900 |
| H  | -2.16372600 | -14.15657300 | -1.70603000 |
| H  | 7.79095700  | -7.80786900  | -2.55121100 |
| H  | 5.89360600  | -11.65728800 | -2.27831100 |
| H  | 5.14755000  | 0.14451600   | -2.81467000 |
| H  | 7.48182900  | -3.43880200  | -2.37680100 |
| H  | -8.14408000 | -3.79752700  | -1.27618800 |
| H  | -5.81753100 | -0.19092300  | -0.97739300 |
| H  | -6.00074700 | -12.01389400 | -1.42372600 |
| H  | -8.20118500 | -8.33108400  | -1.13284400 |
| H  | -0.10928100 | -10.38531100 | -1.82788000 |
| H  | 3.50986000  | -8.08172900  | -2.30103800 |
| H  | 3.22160700  | -3.69669300  | -2.88862900 |
| H  | -3.87459800 | -4.02680900  | -0.83673800 |
| H  | -3.90499900 | -8.25857700  | -1.36369700 |
| C  | -0.27822600 | 2.67612900   | -3.57981600 |
| C  | 1.77120800  | -0.40673600  | -3.24113400 |
| C  | 2.79289600  | -1.03768000  | -3.07567200 |
| C  | -1.54653000 | 2.15174200   | -3.80477500 |
| C  | -1.73543000 | 0.76193900   | -3.85638500 |
| C  | 0.62858600  | 0.43583900   | -3.43022800 |
| C  | 0.80658200  | 1.82810200   | -3.40038700 |
| H  | -0.13375400 | 3.75147500   | -3.54822100 |
| C  | -0.64579300 | -0.09463000  | -3.65941500 |
| H  | -2.39633600 | 2.80917800   | -3.95662900 |
| H  | 1.80096300  | 2.22922200   | -3.23202900 |
| H  | -0.79040300 | -1.16956900  | -3.68615000 |
| C  | -3.03704100 | 0.23571000   | -4.15531800 |
| C  | -4.13803900 | -0.18641000  | -4.46141500 |
| Si | -5.77352700 | -0.83518900  | -5.03796800 |



|      |   |             |              |             |
|------|---|-------------|--------------|-------------|
|      | C | -7.14150000 | 0.17893400   | -4.24905700 |
|      | C | -5.88251600 | -2.64857700  | -4.58083200 |
|      | C | -5.84357800 | -0.62814400  | -6.90418500 |
|      | H | -7.08158800 | 1.22281600   | -4.56971700 |
|      | H | -7.08832800 | 0.15007000   | -3.15870400 |
|      | H | -8.11732000 | -0.21344900  | -4.55278700 |
|      | H | -5.67637700 | -2.79970100  | -3.51828600 |
|      | H | -5.16073600 | -3.23307100  | -5.15857800 |
|      | H | -6.88375900 | -3.03663600  | -4.79358400 |
|      | H | -5.03371600 | -1.17507400  | -7.39453000 |
|      | H | -5.76710300 | 0.42517700   | -7.18762400 |
|      | H | -6.79403600 | -1.01381500  | -7.28668100 |
|      | O | 0.06306000  | -4.75294300  | -0.65302900 |
|      | C | -0.01141200 | -2.90635000  | -0.39879100 |
|      | H | 0.46534300  | -2.95639000  | 0.56874800  |
|      | H | 0.60377500  | -2.77931500  | -1.27814900 |
|      | H | -1.08794100 | -2.88044300  | -0.46763200 |
|      | N | -0.00622400 | -0.87510900  | -0.22197900 |
|      | S | -0.95411600 | -5.62389000  | 0.08210600  |
|      | O | -1.23045700 | -6.84129800  | -0.68824400 |
|      | O | -2.13106400 | -4.83541800  | 0.48681000  |
|      | C | -0.11928900 | -6.11443600  | 1.57559400  |
|      | H | 0.13168800  | -5.21867000  | 2.14445300  |
|      | H | 0.78410200  | -6.66004900  | 1.30383700  |
|      | H | -0.79251800 | -6.75111300  | 2.15001300  |
|      | C | 1.16756300  | -0.24225500  | -0.03677400 |
|      | C | 1.30346200  | 1.13718100   | -0.04982700 |
|      | H | 2.28567700  | 1.56152000   | 0.10800800  |
|      | C | 0.16025400  | 1.94661800   | -0.23623500 |
|      | N | 0.24177700  | 3.29674700   | -0.25365100 |
| TS-a | C | -1.07071600 | 1.27457700   | -0.40530800 |
|      | H | -1.99801900 | 1.80856200   | -0.56193200 |
|      | C | -1.09936500 | -0.11264700  | -0.40939300 |
|      | C | 1.54162800  | 3.94392200   | -0.18866100 |
|      | C | -0.97145800 | 4.09295400   | -0.33737900 |
|      | H | 1.40578800  | 5.02047500   | -0.27300100 |
|      | H | 2.18539800  | 3.61141700   | -1.01081300 |
|      | H | 2.04889200  | 3.73084400   | 0.75968900  |
|      | H | -1.50874900 | 3.90412500   | -1.27397100 |
|      | H | -0.70685700 | 5.14786300   | -0.29836100 |
|      | H | -1.64338000 | 3.87251400   | 0.49978300  |
|      | C | -1.49871100 | -14.35557100 | 1.63546100  |
|      | C | -2.59189200 | -13.49779600 | 1.67552400  |
|      | C | -2.39615900 | -12.10877800 | 1.62787400  |
|      | C | 0.00062900  | -12.46343400 | 1.48881000  |
|      | C | -0.20634900 | -13.84901700 | 1.54532600  |
|      | H | -1.65489200 | -15.42850400 | 1.67252400  |
|      | C | -3.50555500 | -11.20540200 | 1.68542900  |
|      | C | -4.42002100 | -10.41222100 | 1.74070200  |

|   |             |              |            |
|---|-------------|--------------|------------|
| C | -7.84131500 | -8.92685400  | 1.88027900 |
| C | -7.54367200 | -7.57235000  | 1.96093800 |
| C | -6.20603900 | -7.14494200  | 1.97013300 |
| C | -5.48188900 | -9.45433900  | 1.81223800 |
| C | -6.82082700 | -9.86952600  | 1.80803100 |
| H | -8.87638800 | -9.25186000  | 1.87047600 |
| C | -5.90515000 | -5.74827700  | 2.06019700 |
| C | -5.67907400 | -4.56047700  | 2.13856100 |
| C | -6.39544300 | -0.91533000  | 2.36869400 |
| C | -5.11689700 | -0.38897500  | 2.50122100 |
| C | -4.00035900 | -1.24150900  | 2.50250500 |
| C | -5.47030700 | -3.14829700  | 2.24688200 |
| C | -6.57799600 | -2.28794500  | 2.24649700 |
| H | -7.25501300 | -0.25360100  | 2.36176100 |
| C | 2.32026000  | -1.06873100  | 0.19015100 |
| C | 3.28992100  | -1.77332400  | 0.36344200 |
| C | 6.83844800  | -2.83357400  | 0.77157500 |
| C | 6.70606700  | -4.21547500  | 0.82183800 |
| C | 5.43448800  | -4.80746000  | 0.74326400 |
| C | 4.44244900  | -2.60449800  | 0.53945900 |
| C | 5.71505900  | -2.02354900  | 0.63604200 |
| H | 7.82405200  | -2.38409700  | 0.83634300 |
| C | 5.30351400  | -6.23042200  | 0.83128300 |
| C | 5.21796100  | -7.43563300  | 0.92509700 |
| C | 6.14353000  | -11.03885800 | 1.21181400 |
| C | 4.89118900  | -11.63702300 | 1.28480600 |
| C | 3.73240500  | -10.84586600 | 1.24245800 |
| C | 5.10989900  | -8.85871700  | 1.04386700 |
| C | 6.26098700  | -9.65797300  | 1.09302600 |
| H | 7.03676600  | -11.65386700 | 1.24113000 |
| C | 1.32373300  | -11.92353400 | 1.39853100 |
| C | 2.43347100  | -11.44216100 | 1.32586400 |
| C | -1.09832200 | -11.59763800 | 1.52808900 |
| C | -5.17877300 | -8.08891000  | 1.88950300 |
| C | -4.17783800 | -2.62133700  | 2.36112100 |
| C | 4.30393100  | -3.99709300  | 0.59242300 |
| C | 3.84760700  | -9.45828300  | 1.11675800 |
| H | -3.60001400 | -13.89135200 | 1.74918200 |
| H | 0.64806200  | -14.51626400 | 1.50966500 |
| H | -8.33682700 | -6.83461300  | 2.02004500 |
| H | -7.04934900 | -10.92769300 | 1.73908000 |
| H | -4.96694200 | 0.68026000   | 2.60653200 |
| H | -7.57329600 | -2.70690200  | 2.14376900 |
| H | 7.57929900  | -4.84970000  | 0.93124700 |
| H | 5.81029400  | -0.94353000  | 0.58696200 |
| H | 4.79723600  | -12.71375500 | 1.37739400 |
| H | 7.23726300  | -9.19004600  | 1.02544500 |
| H | -0.94332000 | -10.52501200 | 1.47583600 |
| H | -4.14397700 | -7.76218000  | 1.87849300 |

|    |             |              |             |
|----|-------------|--------------|-------------|
| H  | -3.31855700 | -3.28309000  | 2.31964700  |
| H  | 3.31892400  | -4.44556000  | 0.50740700  |
| H  | 2.95413400  | -8.84474900  | 1.07392800  |
| C  | 0.79347200  | 2.68275400   | 3.04574700  |
| C  | -1.61414500 | -0.14220500  | 2.79202700  |
| C  | -2.69264400 | -0.67692500  | 2.65048200  |
| C  | 1.99195200  | 2.01213600   | 3.26751600  |
| C  | 2.01030900  | 0.61092400   | 3.34845200  |
| C  | -0.38139600 | 0.56774000   | 2.95262200  |
| C  | -0.38946400 | 1.97050100   | 2.89519100  |
| H  | 0.78052100  | 3.76695200   | 2.99527000  |
| C  | 0.82168500  | -0.10904000  | 3.18132100  |
| H  | 2.91756200  | 2.56343500   | 3.39649300  |
| H  | -1.32973400 | 2.48573000   | 2.72702100  |
| H  | 0.83336200  | -1.19289000  | 3.23261700  |
| C  | 3.23447500  | -0.07343000  | 3.65300300  |
| C  | 4.26986900  | -0.63482500  | 3.96370700  |
| Si | 5.79980200  | -1.48485400  | 4.56884300  |
| C  | 7.29787500  | -0.70023100  | 3.75356100  |
| C  | 5.63904200  | -3.31385100  | 4.19101900  |
| C  | 5.90140400  | -1.21915300  | 6.42610600  |
| H  | 7.41679300  | 0.33260500   | 4.09390100  |
| H  | 7.21745700  | -0.69489100  | 2.66479600  |
| H  | 8.20265300  | -1.25280800  | 4.02615100  |
| H  | 5.35765400  | -3.48289600  | 3.14881100  |
| H  | 4.87508900  | -3.76532200  | 4.83102000  |
| H  | 6.58685300  | -3.82865500  | 4.37754600  |
| H  | 5.02899200  | -1.63934600  | 6.93392100  |
| H  | 5.96237700  | -0.15500500  | 6.67031300  |
| H  | 6.79530500  | -1.70999300  | 6.82434700  |
| C  | -0.02302700 | -14.41037900 | -1.81739200 |
| C  | 1.16719700  | -13.69785000 | -1.90311100 |
| C  | 1.14454100  | -12.29460300 | -1.92470000 |
| C  | -1.27609700 | -12.34289100 | -1.76675400 |
| C  | -1.24255700 | -13.74437800 | -1.75089800 |
| H  | -0.00079400 | -15.49491300 | -1.79747500 |
| C  | 2.35861600  | -11.54139400 | -2.01575600 |
| C  | 3.36999800  | -10.87840400 | -2.09287300 |
| C  | 6.95588000  | -9.85220100  | -2.23739600 |
| C  | 6.83750000  | -8.47156800  | -2.34058800 |
| C  | 5.56659900  | -7.87574500  | -2.37331200 |
| C  | 4.54796600  | -10.06938700 | -2.18145200 |
| C  | 5.82181400  | -10.65396000 | -2.15856500 |
| H  | 7.94024300  | -10.30772000 | -2.21057300 |
| C  | 5.43557600  | -6.45385600  | -2.48198000 |
| C  | 5.32529600  | -5.25008900  | -2.56868100 |
| C  | 6.31171500  | -1.66038400  | -2.71250300 |
| C  | 5.07778300  | -1.04127200  | -2.86029200 |
| C  | 3.90415700  | -1.81170000  | -2.91829900 |

|   |             |              |             |
|---|-------------|--------------|-------------|
| C | 5.22995500  | -3.82476300  | -2.66833900 |
| C | 6.39477100  | -3.04521800  | -2.61820800 |
| H | 7.21483900  | -1.06098500  | -2.66745000 |
| C | -2.34608800 | -0.79233100  | -0.62588200 |
| C | -3.40611900 | -1.35637600  | -0.78706500 |
| C | -7.06501600 | -1.97874000  | -1.14341400 |
| C | -7.09839600 | -3.36690300  | -1.20424400 |
| C | -5.90421700 | -4.10369800  | -1.14704000 |
| C | -4.65624900 | -2.03620800  | -0.95074100 |
| C | -5.85166500 | -1.30736700  | -1.02397700 |
| H | -7.99134600 | -1.41499600  | -1.18719200 |
| C | -5.92840400 | -5.53273900  | -1.23526000 |
| C | -5.94301700 | -6.74129200  | -1.32254000 |
| C | -7.20643300 | -10.24013100 | -1.58510200 |
| C | -6.01742100 | -10.95720500 | -1.63360000 |
| C | -4.78719100 | -10.28309600 | -1.58309900 |
| C | -5.96536100 | -8.16942800  | -1.42620600 |
| C | -7.18830000 | -8.85304300  | -1.48499400 |
| H | -8.15501100 | -10.76540400 | -1.62315800 |
| C | -2.52005800 | -11.63755400 | -1.69834500 |
| C | -3.55922200 | -11.01684100 | -1.64287500 |
| C | -0.07899500 | -11.62250000 | -1.85092400 |
| C | 4.42563900  | -8.67893900  | -2.28976200 |
| C | 3.98268800  | -3.20330800  | -2.81468500 |
| C | -4.68276000 | -3.43531900  | -1.00709500 |
| C | -4.76489100 | -8.88894900  | -1.47222900 |
| H | 2.11879400  | -14.21594700 | -1.95616400 |
| H | -2.17192900 | -14.29877200 | -1.67642900 |
| H | 7.72057800  | -7.84426500  | -2.39823800 |
| H | 5.91171800  | -11.73117400 | -2.06757100 |
| H | 5.00589400  | 0.03847100   | -2.93610300 |
| H | 7.35538500  | -3.53409700  | -2.49683700 |
| H | -8.04295300 | -3.89107300  | -1.30412700 |
| H | -5.81934200 | -0.22382900  | -0.96868200 |
| H | -6.02720200 | -12.03895100 | -1.71345500 |
| H | -8.11437500 | -8.28977000  | -1.44194000 |
| H | -0.10167100 | -10.53783000 | -1.85488100 |
| H | 3.44123100  | -8.22323600  | -2.30279300 |
| H | 3.07898000  | -3.80331700  | -2.84371100 |
| H | -3.75886400 | -3.99828300  | -0.91102800 |
| H | -3.81695800 | -8.36359800  | -1.41215700 |
| C | -0.35700800 | 2.63616700   | -3.53365900 |
| C | 1.63950700  | -0.48629700  | -3.22947600 |
| C | 2.64911200  | -1.14098100  | -3.08131000 |
| C | -1.63642800 | 2.13472900   | -3.74910600 |
| C | -1.84929200 | 0.74849600   | -3.80547700 |
| C | 0.51273000  | 0.38032700   | -3.40290500 |
| C | 0.71537600  | 1.76925900   | -3.36678600 |
| H | -0.19357900 | 3.70879200   | -3.50093800 |

|  |    |             |              |             |
|--|----|-------------|--------------|-------------|
|  | C  | -0.77237200 | -0.12698200  | -3.62359800 |
|  | H  | -2.47579700 | 2.80752000   | -3.89094100 |
|  | H  | 1.71754200  | 2.15330000   | -3.20485300 |
|  | H  | -0.93498500 | -1.19932600  | -3.65674200 |
|  | C  | -3.15822300 | 0.23975900   | -4.10038100 |
|  | C  | -4.26523300 | -0.16880200  | -4.40225900 |
|  | Si | -5.90261500 | -0.79941700  | -4.99347500 |
|  | C  | -7.26997900 | 0.18292400   | -4.16355600 |
|  | C  | -5.99213400 | -2.63037100  | -4.60521500 |
|  | C  | -5.98216000 | -0.52219300  | -6.85032300 |
|  | H  | -7.22249600 | 1.23353400   | -4.46418700 |
|  | H  | -7.20301400 | 0.13367400   | -3.07483400 |
|  | H  | -8.24610800 | -0.21136300  | -4.46350900 |
|  | H  | -5.73561000 | -2.82393400  | -3.56061400 |
|  | H  | -5.29585700 | -3.18773700  | -5.23867800 |
|  | H  | -7.00071400 | -3.01464900  | -4.78714900 |
|  | H  | -5.17374400 | -1.04933800  | -7.36416200 |
|  | H  | -5.90851900 | 0.54124900   | -7.09422500 |
|  | H  | -6.93379500 | -0.89487100  | -7.24268000 |
|  | O  | -0.14519400 | -5.27228900  | -0.51965600 |
|  | C  | -0.06081500 | -2.34536600  | -0.22588400 |
|  | H  | 0.48507300  | -2.72897000  | 0.63508600  |
|  | H  | 0.40691500  | -2.71405100  | -1.14050200 |
|  | H  | -1.09288100 | -2.68186500  | -0.17164900 |
|  | N  | -0.00580900 | -0.87110200  | -0.21078800 |
|  | S  | -1.31935500 | -5.78342800  | 0.22616600  |
|  | O  | -1.96638400 | -6.95556400  | -0.41396200 |
|  | O  | -2.28612700 | -4.70907000  | 0.58319600  |
|  | C  | -0.67392700 | -6.37613400  | 1.78454700  |
|  | H  | -0.20398000 | -5.54050500  | 2.30657300  |
|  | H  | 0.06315700  | -7.15660300  | 1.58769700  |
|  | H  | -1.49646400 | -6.77736800  | 2.37786800  |
|  | C  | 1.19989200  | -0.24762200  | -0.03880600 |
|  | C  | 1.31873700  | 1.12322500   | -0.06012000 |
|  | H  | 2.30454800  | 1.54180700   | 0.08450100  |
|  | C  | 0.17308900  | 1.94061900   | -0.23116900 |
|  | N  | 0.25776800  | 3.27866600   | -0.23944900 |
|  | C  | -1.06422200 | 1.27023400   | -0.39420700 |
|  | H  | -1.98899500 | 1.80722000   | -0.54940000 |
|  | C  | -1.12390400 | -0.10664900  | -0.40192700 |
|  | C  | 1.56133800  | 3.92731300   | -0.16950000 |
|  | C  | -0.95531000 | 4.08335200   | -0.31527600 |
|  | H  | 1.42257700  | 5.00397700   | -0.23546200 |
|  | H  | 2.19761300  | 3.60705700   | -1.00073900 |
|  | H  | 2.06645700  | 3.69672900   | 0.77468000  |
|  | H  | -1.48954900 | 3.90096800   | -1.25360800 |
|  | H  | -0.68429400 | 5.13553800   | -0.26892800 |
|  | H  | -1.62220300 | 3.85658700   | 0.52271400  |
|  | C  | -1.48444100 | -14.32262000 | 1.64561800  |

4a

|   |             |              |            |
|---|-------------|--------------|------------|
| C | -2.58734000 | -13.47676900 | 1.67449300 |
| C | -2.40738300 | -12.08605500 | 1.61725500 |
| C | -0.00640400 | -12.41414800 | 1.49166500 |
| C | -0.19785400 | -13.80166800 | 1.55807200 |
| H | -1.62860700 | -15.39695300 | 1.69014900 |
| C | -3.52833000 | -11.19642700 | 1.66569000 |
| C | -4.45482600 | -10.41675200 | 1.71285900 |
| C | -7.88916400 | -8.95867600  | 1.84450100 |
| C | -7.60127300 | -7.60227500  | 1.93297500 |
| C | -6.26722800 | -7.16468400  | 1.94211400 |
| C | -5.52596500 | -9.46852200  | 1.77661800 |
| C | -6.86187900 | -9.89362800  | 1.77023900 |
| H | -8.92183000 | -9.29111300  | 1.83334200 |
| C | -5.97196800 | -5.76740800  | 2.04046000 |
| C | -5.73199000 | -4.58276900  | 2.12468800 |
| C | -6.34812000 | -0.91864900  | 2.37313800 |
| C | -5.05475100 | -0.43013200  | 2.50326700 |
| C | -3.96290200 | -1.31471400  | 2.49066300 |
| C | -5.48659900 | -3.17643200  | 2.23527700 |
| C | -6.56950500 | -2.28550100  | 2.24545800 |
| H | -7.18868100 | -0.23280200  | 2.37432800 |
| C | 2.34697200  | -1.06535500  | 0.17587600 |
| C | 3.32037100  | -1.76494900  | 0.34823200 |
| C | 6.87407200  | -2.80891700  | 0.71852000 |
| C | 6.74448300  | -4.19086900  | 0.77793100 |
| C | 5.47362000  | -4.78737400  | 0.72279000 |
| C | 4.47652600  | -2.58943000  | 0.51972400 |
| C | 5.74741600  | -2.00165400  | 0.59491000 |
| H | 7.85978900  | -2.35767000  | 0.76579100 |
| C | 5.34385600  | -6.20902000  | 0.82139900 |
| C | 5.25359500  | -7.41328700  | 0.91927100 |
| C | 6.13835300  | -11.02473700 | 1.22200200 |
| C | 4.87881500  | -11.60744400 | 1.29539800 |
| C | 3.72889500  | -10.80325000 | 1.24801600 |
| C | 5.13019000  | -8.83430200  | 1.04383500 |
| C | 6.27211100  | -9.64576000  | 1.09802800 |
| H | 7.02415600  | -11.65020300 | 1.25527600 |
| C | 1.31332600  | -11.86552700 | 1.40398500 |
| C | 2.42439600  | -11.38716700 | 1.33182300 |
| C | -1.11499200 | -11.56032100 | 1.51905100 |
| C | -5.23307600 | -8.10114800  | 1.85408500 |
| C | -4.17702400 | -2.68811200  | 2.33891400 |
| C | 4.33883100  | -3.98141800  | 0.58401700 |
| C | 3.86011700  | -9.41781500  | 1.11676200 |
| H | -3.59128100 | -13.88105300 | 1.74733800 |
| H | 0.66463100  | -14.45886200 | 1.53171800 |
| H | -8.40004900 | -6.87112000  | 1.99804000 |
| H | -7.08268300 | -10.95336600 | 1.70012200 |
| H | -4.87372200 | 0.63363200   | 2.61570800 |

|    |             |              |             |
|----|-------------|--------------|-------------|
| H  | -7.57699300 | -2.67583700  | 2.14727900  |
| H  | 7.62102500  | -4.82225300  | 0.87701500  |
| H  | 5.83875300  | -0.92174700  | 0.53794100  |
| H  | 4.77188200  | -12.68264200 | 1.39197500  |
| H  | 7.25369600  | -9.18909100  | 1.03020100  |
| H  | -0.97311000 | -10.48630800 | 1.45723200  |
| H  | -4.20077800 | -7.76813500  | 1.82776900  |
| H  | -3.33871700 | -3.37492100  | 2.26952200  |
| H  | 3.35362300  | -4.43237100  | 0.51912100  |
| H  | 2.97448500  | -8.79285600  | 1.07030700  |
| C  | 0.79352100  | 2.61929100   | 3.04557600  |
| C  | -1.56346500 | -0.24553600  | 2.78380400  |
| C  | -2.64266400 | -0.77812400  | 2.63672500  |
| C  | 2.00716000  | 1.97082400   | 3.25241500  |
| C  | 2.05280600  | 0.56991700   | 3.32870200  |
| C  | -0.34123100 | 0.48154700   | 2.95036800  |
| C  | -0.37661300 | 1.88484300   | 2.89947900  |
| H  | 0.75854600  | 3.70354200   | 3.00360900  |
| C  | 0.87625600  | -0.17264300  | 3.17103500  |
| H  | 2.92313500  | 2.53938000   | 3.37528100  |
| H  | -1.32839400 | 2.38270300   | 2.74287200  |
| H  | 0.90909000  | -1.25600900  | 3.22631000  |
| C  | 3.29262100  | -0.09151700  | 3.61945800  |
| C  | 4.34135700  | -0.63366900  | 3.91906000  |
| Si | 5.88955100  | -1.45539500  | 4.51986600  |
| C  | 7.36867300  | -0.66057600  | 3.67999300  |
| C  | 5.74414100  | -3.29026300  | 4.16562900  |
| C  | 6.00324600  | -1.16411400  | 6.37226400  |
| H  | 7.47945400  | 0.37620800   | 4.01094100  |
| H  | 7.27613800  | -0.66424500  | 2.59216600  |
| H  | 8.28285300  | -1.20045900  | 3.94653700  |
| H  | 5.44286400  | -3.47366700  | 3.13144200  |
| H  | 4.99778300  | -3.74281500  | 4.82542500  |
| H  | 6.70110200  | -3.79279800  | 4.33830100  |
| H  | 5.14083500  | -1.58974600  | 6.89250800  |
| H  | 6.05184200  | -0.09620400  | 6.60244100  |
| H  | 6.90701300  | -1.63783300  | 6.76899700  |
| C  | 0.01297400  | -14.38453700 | -1.79993400 |
| C  | 1.20990900  | -13.68311100 | -1.88640400 |
| C  | 1.19916800  | -12.28001400 | -1.91758700 |
| C  | -1.22234700 | -12.30601800 | -1.76727300 |
| C  | -1.20099600 | -13.70767700 | -1.74198500 |
| H  | 0.02570200  | -15.46908400 | -1.77248000 |
| C  | 2.41760400  | -11.53415000 | -2.00931100 |
| C  | 3.42759000  | -10.86914900 | -2.08712500 |
| C  | 7.00788900  | -9.82270700  | -2.23050900 |
| C  | 6.88126600  | -8.44299900  | -2.33668500 |
| C  | 5.60680000  | -7.85482500  | -2.37242000 |
| C  | 4.60132300  | -10.05419600 | -2.17634500 |

|   |             |              |             |
|---|-------------|--------------|-------------|
| C | 5.87857600  | -10.63112300 | -2.15145700 |
| H | 7.99496400  | -10.27217600 | -2.20225000 |
| C | 5.46759000  | -6.43388800  | -2.48618000 |
| C | 5.35092400  | -5.23105500  | -2.57806900 |
| C | 6.32908800  | -1.63945300  | -2.74344900 |
| C | 5.09322200  | -1.02268100  | -2.88469600 |
| C | 3.92106100  | -1.79603800  | -2.93288000 |
| C | 5.25108100  | -3.80632700  | -2.68377200 |
| C | 6.41461500  | -3.02386400  | -2.64451900 |
| H | 7.23165700  | -1.03873900  | -2.70673300 |
| C | -2.36861800 | -0.76291200  | -0.62333700 |
| C | -3.43282700 | -1.31481100  | -0.79657800 |
| C | -7.08911800 | -1.94484200  | -1.16073700 |
| C | -7.11135700 | -3.33400500  | -1.21570200 |
| C | -5.91337100 | -4.06387900  | -1.14813700 |
| C | -4.68475500 | -1.98740200  | -0.95837800 |
| C | -5.88167500 | -1.26284100  | -1.04191700 |
| H | -8.01974400 | -1.38902300  | -1.21153400 |
| C | -5.92156400 | -5.49270400  | -1.23647400 |
| C | -5.91518700 | -6.70088200  | -1.32791500 |
| C | -7.14240400 | -10.20603400 | -1.64193000 |
| C | -5.94583700 | -10.91036300 | -1.68307500 |
| C | -4.72238500 | -10.22590000 | -1.60376200 |
| C | -5.92026400 | -8.12806500  | -1.44276600 |
| C | -7.13702700 | -8.82005700  | -1.52663600 |
| H | -8.08559600 | -10.73935400 | -1.69922300 |
| C | -2.45950800 | -11.58866500 | -1.70434900 |
| C | -3.49242800 | -10.95721400 | -1.65381300 |
| C | -0.01883200 | -11.59702600 | -1.85249200 |
| C | 4.47061700  | -8.66463100  | -2.28769700 |
| C | 4.00196400  | -3.18735700  | -2.82501800 |
| C | -4.69800400 | -3.38691300  | -1.00180300 |
| C | -4.71003200 | -8.83289200  | -1.47324300 |
| H | 2.15701500  | -14.21002400 | -1.93263300 |
| H | -2.13529900 | -14.25356800 | -1.66602100 |
| H | 7.76063400  | -7.81057200  | -2.39511700 |
| H | 5.97480700  | -11.70763900 | -2.05875200 |
| H | 5.01892000  | 0.05661700   | -2.96409800 |
| H | 7.37697600  | -3.51051200  | -2.52776800 |
| H | -8.05231200 | -3.86414400  | -1.31874900 |
| H | -5.85638600 | -0.17875100  | -0.99598200 |
| H | -5.94365600 | -11.99115700 | -1.77690800 |
| H | -8.06793000 | -8.26409100  | -1.49199000 |
| H | -0.03225500 | -10.51234600 | -1.86338400 |
| H | 3.48342300  | -8.21508400  | -2.30247300 |
| H | 3.09887200  | -3.78820000  | -2.84789600 |
| H | -3.77079900 | -3.93960600  | -0.87779600 |
| H | -3.77000200 | -8.29566800  | -1.37572700 |
| C | -0.36308700 | 2.63285600   | -3.52884100 |



|    |    |             |             |             |
|----|----|-------------|-------------|-------------|
|    | C  | 1.65003200  | -0.47960800 | -3.23564600 |
|    | C  | 2.66369800  | -1.12868100 | -3.09119500 |
|    | C  | -1.64244500 | 2.12534400  | -3.73210600 |
|    | C  | -1.84937300 | 0.73812500  | -3.78891900 |
|    | C  | 0.51780600  | 0.38074900  | -3.40475600 |
|    | C  | 0.71489300  | 1.77093200  | -3.37108100 |
|    | H  | -0.20366600 | 3.70630500  | -3.50140400 |
|    | C  | -0.76679400 | -0.13285200 | -3.61702900 |
|    | H  | -2.48597700 | 2.79427800  | -3.86682100 |
|    | H  | 1.71743800  | 2.15940400  | -3.22209400 |
|    | H  | -0.92399500 | -1.20595800 | -3.65467700 |
|    | C  | -3.15804200 | 0.22658100  | -4.07919300 |
|    | C  | -4.26433600 | -0.18031500 | -4.38550600 |
|    | Si | -5.89366400 | -0.80916100 | -5.00297500 |
|    | C  | -7.27369200 | 0.18034400  | -4.20365300 |
|    | C  | -5.99206200 | -2.63872500 | -4.61233900 |
|    | C  | -5.93610300 | -0.53440200 | -6.86128900 |
|    | H  | -7.21516400 | 1.22980800  | -4.50642900 |
|    | H  | -7.23194500 | 0.13426000  | -3.11359800 |
|    | H  | -8.24442800 | -0.21071900 | -4.52466500 |
|    | H  | -5.74260400 | -2.83179500 | -3.56611600 |
|    | H  | -5.29271400 | -3.19855100 | -5.24016700 |
|    | H  | -7.00032400 | -3.02068600 | -4.80057900 |
|    | H  | -5.12065800 | -1.06589100 | -7.35929000 |
|    | H  | -5.85327400 | 0.52839500  | -7.10500500 |
|    | H  | -6.88203000 | -0.90340400 | -7.27054700 |
| 3b | N  | 0.01498400  | -0.88887800 | -0.21083200 |
|    | C  | -0.26414900 | -3.80409700 | -0.36457200 |
|    | H  | 0.01933700  | -3.59997100 | 0.66916700  |
|    | H  | 0.54202600  | -3.51092700 | -1.03380100 |
|    | H  | -1.17896100 | -3.26798400 | -0.61272000 |
|    | O  | -0.43471200 | -5.23204500 | -0.58500400 |
|    | S  | -1.48187700 | -6.01784900 | 0.33823500  |
|    | O  | -2.17489800 | -6.96047400 | -0.52833800 |
|    | O  | -2.26908600 | -5.05801500 | 1.10285200  |
|    | C  | -0.39553900 | -6.91574400 | 1.43080400  |
|    | H  | 0.20903100  | -6.16397500 | 1.94820200  |
|    | H  | 0.25019500  | -7.51371600 | 0.78138800  |
|    | C  | -1.19442900 | -7.78019300 | 2.40355900  |
|    | H  | -1.86274100 | -7.13940000 | 2.98865500  |
|    | C  | -0.26088400 | -8.54871800 | 3.33717000  |
|    | H  | -1.82562900 | -8.47356500 | 1.83351600  |
|    | H  | 0.45333700  | -9.15978100 | 2.77359100  |
|    | H  | -0.83611900 | -9.21405800 | 3.98694300  |
|    | H  | 0.31001200  | -7.86102300 | 3.96873200  |
|    | C  | 1.18254500  | -0.24998800 | -0.03858500 |
|    | C  | 1.34053600  | 1.13232100  | -0.05611200 |
|    | H  | 2.32805400  | 1.54921400  | 0.09199000  |
|    | C  | 0.20798800  | 1.95187600  | -0.24051600 |

|   |             |              |             |
|---|-------------|--------------|-------------|
| N | 0.30034500  | 3.30808300   | -0.25419800 |
| C | -1.02506700 | 1.28962100   | -0.41140000 |
| H | -1.94794200 | 1.83132800   | -0.57154100 |
| C | -1.05513000 | -0.10146900  | -0.40088600 |
| C | 1.60337400  | 3.94265200   | -0.18727900 |
| C | -0.90696300 | 4.11003300   | -0.32280800 |
| H | 1.47790000  | 5.02132500   | -0.26705200 |
| H | 2.24595800  | 3.60905800   | -1.01080600 |
| H | 2.11279000  | 3.72191000   | 0.75901200  |
| H | -1.45574400 | 3.93082600   | -1.25530800 |
| H | -0.63737100 | 5.16402900   | -0.27995100 |
| H | -1.57505100 | 3.88865400   | 0.51834500  |
| C | -1.43843700 | -14.22300600 | 1.79350000  |
| C | -2.51922700 | -13.34816800 | 1.80223000  |
| C | -2.30679200 | -11.96898400 | 1.65133500  |
| C | 0.08227100  | -12.36891400 | 1.48490100  |
| C | -0.14092600 | -13.74401500 | 1.64340200  |
| H | -1.60858500 | -15.28828500 | 1.90910300  |
| C | -3.39986100 | -11.04485200 | 1.69197100  |
| C | -4.30920600 | -10.24451400 | 1.73887000  |
| C | -7.77123000 | -8.87223800  | 1.92582400  |
| C | -7.52084400 | -7.50773900  | 2.00155300  |
| C | -6.19970400 | -7.03284600  | 1.98408000  |
| C | -5.39561800 | -9.31448200  | 1.81579000  |
| C | -6.71898500 | -9.77750900  | 1.83747100  |
| H | -8.79391600 | -9.23438600  | 1.93496500  |
| C | -5.94168100 | -5.62790100  | 2.07341500  |
| C | -5.73751800 | -4.43630100  | 2.15298800  |
| C | -6.47819000 | -0.79309000  | 2.34925000  |
| C | -5.20309200 | -0.25832200  | 2.48467600  |
| C | -4.08191800 | -1.10432700  | 2.50777900  |
| C | -5.54057900 | -3.02207400  | 2.25832500  |
| C | -6.65286400 | -2.16766900  | 2.23929400  |
| H | -7.34091400 | -0.13572900  | 2.32840200  |
| C | 2.33753500  | -1.08194600  | 0.18049900  |
| C | 3.31850400  | -1.77223400  | 0.35021000  |
| C | 6.88801800  | -2.76045600  | 0.78367900  |
| C | 6.78834800  | -4.14591600  | 0.81516300  |
| C | 5.53152300  | -4.76334200  | 0.70983100  |
| C | 4.48837300  | -2.58031400  | 0.52202700  |
| C | 5.74825600  | -1.97477400  | 0.64074200  |
| H | 7.86162700  | -2.28841100  | 0.86832700  |
| C | 5.42246700  | -6.18936700  | 0.77196400  |
| C | 5.34139300  | -7.39670400  | 0.83681200  |
| C | 6.22709000  | -11.01933100 | 0.99309100  |
| C | 4.96968100  | -11.60141700 | 1.10180100  |
| C | 3.82251300  | -10.79262900 | 1.12604600  |
| C | 5.22164400  | -8.82096500  | 0.92279800  |
| C | 6.36112700  | -9.63751800  | 0.90508200  |

|    |             |              |            |
|----|-------------|--------------|------------|
| H  | 7.11126000  | -11.64759300 | 0.97243200 |
| C  | 1.40771900  | -11.84539600 | 1.34853900 |
| C  | 2.51870400  | -11.37159000 | 1.24594500 |
| C  | -1.00551000 | -11.48978200 | 1.47815300 |
| C  | -5.14054900 | -7.93917600  | 1.87992500 |
| C  | -4.25247400 | -2.48713600  | 2.38475000 |
| C  | 4.38487200  | -3.97620100  | 0.55711500 |
| C  | 3.95412600  | -9.40440900  | 1.03140500 |
| H  | -3.52946700 | -13.72119600 | 1.93216700 |
| H  | 0.70365100  | -14.42452800 | 1.64146500 |
| H  | -8.33842700 | -6.79871000  | 2.07716000 |
| H  | -6.91013500 | -10.84351900 | 1.77617900 |
| H  | -5.05993900 | 0.81316000   | 2.57599600 |
| H  | -7.64499100 | -2.59261600  | 2.13037500 |
| H  | 7.67451600  | -4.76112700  | 0.92904400 |
| H  | 5.82084700  | -0.89245700  | 0.60423100 |
| H  | 4.86291500  | -12.67868100 | 1.17083000 |
| H  | 7.34111300  | -9.18210200  | 0.81155900 |
| H  | -0.83583000 | -10.42911900 | 1.32901100 |
| H  | -4.11983500 | -7.57193700  | 1.83951500 |
| H  | -3.39069400 | -3.14677800  | 2.37028200 |
| H  | 3.41230400  | -4.44815800  | 0.46109600 |
| H  | 3.06944100  | -8.77645900  | 1.04079100 |
| C  | 0.76185400  | 2.77875800   | 3.03899700 |
| C  | -1.69347800 | -0.00720300  | 2.79395400 |
| C  | -2.77617900 | -0.53384600  | 2.65381700 |
| C  | 1.94690200  | 2.08864700   | 3.27168000 |
| C  | 1.94023000  | 0.68795800   | 3.36136200 |
| C  | -0.45004100 | 0.68450300   | 2.95463100 |
| C  | -0.43268300 | 2.08657800   | 2.88793500 |
| H  | 0.76880000  | 3.86252400   | 2.97847400 |
| C  | 0.74002400  | -0.01185000  | 3.19248200 |
| H  | 2.88160600  | 2.62437000   | 3.40096300 |
| H  | -1.36242800 | 2.61763100   | 2.71059900 |
| H  | 0.73218400  | -1.09526800  | 3.24826100 |
| C  | 3.15288100  | -0.01431500  | 3.67232500 |
| C  | 4.17809300  | -0.59180200  | 3.98802900 |
| Si | 5.69820500  | -1.45775100  | 4.59510900 |
| C  | 7.20731400  | -0.65538600  | 3.81852900 |
| C  | 5.55368100  | -3.27794100  | 4.17107000 |
| C  | 5.77208800  | -1.23640900  | 6.45974700 |
| H  | 7.32024200  | 0.37132000   | 4.17864500 |
| H  | 7.14169000  | -0.63167000  | 2.72890300 |
| H  | 8.10876200  | -1.21215800  | 4.09376300 |
| H  | 5.33667400  | -3.42544800  | 3.11024500 |
| H  | 4.75236500  | -3.74133100  | 4.75426200 |
| H  | 6.48818800  | -3.79829500  | 4.40396900 |
| H  | 4.89353500  | -1.67031400  | 6.94495600 |
| H  | 5.82649000  | -0.17814400  | 6.72994900 |

|   |             |              |             |
|---|-------------|--------------|-------------|
| H | 6.66144500  | -1.73447300  | 6.85926600  |
| C | 0.01347700  | -14.34966200 | -1.71544100 |
| C | 1.18410600  | -13.61410400 | -1.85701800 |
| C | 1.12670800  | -12.21424800 | -1.94857800 |
| C | -1.29009700 | -12.31358900 | -1.75262500 |
| C | -1.22152700 | -13.71081000 | -1.66311500 |
| H | 0.06331400  | -15.43084900 | -1.63853300 |
| C | 2.32431500  | -11.44057200 | -2.08147500 |
| C | 3.32722500  | -10.76862100 | -2.18803400 |
| C | 6.91405900  | -9.78278300  | -2.47341100 |
| C | 6.81166800  | -8.39843400  | -2.53375700 |
| C | 5.55012600  | -7.78364100  | -2.48931800 |
| C | 4.50807300  | -9.96721500  | -2.30802200 |
| C | 5.77276600  | -10.57004300 | -2.36236300 |
| H | 7.89138300  | -10.25261500 | -2.50818300 |
| C | 5.44245200  | -6.35721200  | -2.56002000 |
| C | 5.36439700  | -5.14924600  | -2.62037200 |
| C | 6.44073700  | -1.58257500  | -2.67810300 |
| C | 5.22470600  | -0.93005700  | -2.83385300 |
| C | 4.03387300  | -1.66950400  | -2.92561700 |
| C | 5.30699500  | -3.71990100  | -2.69333500 |
| C | 6.48954400  | -2.97055800  | -2.60849900 |
| H | 7.35729200  | -1.00642100  | -2.60651200 |
| C | -2.31131300 | -0.77567600  | -0.60617600 |
| C | -3.36754400 | -1.34729900  | -0.76695500 |
| C | -7.02366200 | -1.96447200  | -1.16258000 |
| C | -7.06279000 | -3.35202600  | -1.22680200 |
| C | -5.87248200 | -4.09354200  | -1.15340100 |
| C | -4.61540400 | -2.02928700  | -0.93882700 |
| C | -5.80938100 | -1.29870300  | -1.02349600 |
| H | -7.94672100 | -1.39627500  | -1.21759500 |
| C | -5.90439600 | -5.52239400  | -1.23826100 |
| C | -5.93699900 | -6.73108100  | -1.32058900 |
| C | -7.23779200 | -10.21977900 | -1.54755900 |
| C | -6.05555800 | -10.94856900 | -1.60261800 |
| C | -4.81957100 | -10.28468800 | -1.57071900 |
| C | -5.97667300 | -8.15978500  | -1.41702800 |
| C | -7.20656200 | -8.83206600  | -1.45877900 |
| H | -8.19128200 | -10.73681900 | -1.57214600 |
| C | -2.54784900 | -11.63194100 | -1.69182500 |
| C | -3.59373100 | -11.02246400 | -1.63488700 |
| C | -0.11209900 | -11.56966500 | -1.89221600 |
| C | 4.40191900  | -8.57261200  | -2.37195100 |
| C | 4.07890700  | -3.06469100  | -2.84925600 |
| C | -4.65170600 | -3.42783600  | -0.99865500 |
| C | -4.78302700 | -8.88985100  | -1.46976900 |
| H | 2.14777600  | -14.11076000 | -1.89502200 |
| H | -2.13554200 | -14.28254100 | -1.54333000 |
| H | 7.70039300  | -7.78212500  | -2.61803900 |

|      |    |             |              |             |
|------|----|-------------|--------------|-------------|
|      | H  | 5.84989200  | -11.65052800 | -2.30560300 |
|      | H  | 5.18121200  | 0.15243500   | -2.88957100 |
|      | H  | 7.43604600  | -3.48446000  | -2.47961600 |
|      | H  | -8.00761100 | -3.87272000  | -1.34038000 |
|      | H  | -5.77379000 | -0.21564500  | -0.96275800 |
|      | H  | -6.07677000 | -12.03078800 | -1.67431900 |
|      | H  | -8.12742700 | -8.26052800  | -1.41109100 |
|      | H  | -0.16224100 | -10.48738100 | -1.95074900 |
|      | H  | 3.42517200  | -8.10297000  | -2.32439400 |
|      | H  | 3.16173400  | -3.64127800  | -2.90805100 |
|      | H  | -3.73320200 | -3.99841100  | -0.90742500 |
|      | H  | -3.83148500 | -8.37069400  | -1.41624200 |
|      | C  | -0.26926700 | 2.76760700   | -3.52599800 |
|      | C  | 1.78186000  | -0.32219300  | -3.23907700 |
|      | C  | 2.79307800  | -0.97413300  | -3.09279500 |
|      | C  | -1.53799000 | 2.24462300   | -3.75287000 |
|      | C  | -1.72482100 | 0.85526000   | -3.82108100 |
|      | C  | 0.64180000  | 0.52742900   | -3.40925900 |
|      | C  | 0.81803000  | 1.91927200   | -3.36156500 |
|      | H  | -0.12627700 | 3.84272600   | -3.48119400 |
|      | C  | -0.63288400 | -0.00130200  | -3.63965100 |
|      | H  | -2.38916100 | 2.90295600   | -3.89267600 |
|      | H  | 1.81212800  | 2.32037000   | -3.19154900 |
|      | H  | -0.77580300 | -1.07603600  | -3.67939700 |
|      | C  | -3.02420100 | 0.32533500   | -4.12249200 |
|      | C  | -4.12428900 | -0.10066200  | -4.42623200 |
|      | Si | -5.75745000 | -0.74405900  | -5.01439700 |
|      | C  | -7.13018100 | 0.23874800   | -4.19431800 |
|      | C  | -5.84999600 | -2.57147200  | -4.60963000 |
|      | C  | -5.83464500 | -0.48339700  | -6.87378900 |
|      | H  | -7.07070900 | 1.29318900   | -4.47887800 |
|      | H  | -7.08095600 | 0.17279700   | -3.10541900 |
|      | H  | -8.10398900 | -0.14450100  | -4.51546100 |
|      | H  | -5.62034100 | -2.75422900  | -3.55674200 |
|      | H  | -5.13833100 | -3.13475200  | -5.22020300 |
|      | H  | -6.85362800 | -2.95837200  | -4.81256200 |
|      | H  | -5.02303500 | -1.01130300  | -7.38173900 |
|      | H  | -5.76472000 | 0.57828900   | -7.12645800 |
|      | H  | -6.78391900 | -0.86318000  | -7.26493600 |
| TS-b | N  | -0.00795600 | -0.87966100  | -0.22783600 |
|      | C  | -0.09203800 | -2.91412400  | -0.37795000 |
|      | H  | 0.18606300  | -2.97582800  | 0.66330700  |
|      | H  | 0.67766000  | -2.85291000  | -1.13334500 |
|      | H  | -1.13013800 | -2.80994500  | -0.64414600 |
|      | O  | -0.13041600 | -4.76936300  | -0.60110600 |
|      | S  | -1.22841800 | -5.54650400  | 0.12849100  |
|      | O  | -1.99295500 | -6.38793200  | -0.80364000 |
|      | O  | -2.03817300 | -4.64876000  | 0.97058400  |
|      | C  | -0.30442100 | -6.63056200  | 1.21175600  |

|   |             |              |             |
|---|-------------|--------------|-------------|
| H | 0.28575900  | -5.97183500  | 1.85620800  |
| H | 0.37997400  | -7.19262200  | 0.56911700  |
| C | -1.20481400 | -7.55481900  | 2.02226800  |
| H | -1.95053700 | -6.95043900  | 2.55072100  |
| C | -0.39157400 | -8.36943600  | 3.02642100  |
| H | -1.74963600 | -8.21586000  | 1.33682600  |
| H | 0.39883500  | -8.94134500  | 2.52723400  |
| H | -1.03074800 | -9.07496100  | 3.56437700  |
| H | 0.08596900  | -7.71334800  | 3.76016100  |
| C | 1.17244100  | -0.26141400  | -0.03848500 |
| C | 1.32449700  | 1.11710700   | -0.05292500 |
| H | 2.31144000  | 1.53010700   | 0.10605600  |
| C | 0.19282000  | 1.94048800   | -0.24644100 |
| N | 0.29039500  | 3.28961600   | -0.26809800 |
| C | -1.04610100 | 1.28330900   | -0.41602500 |
| H | -1.96724900 | 1.82796600   | -0.57237200 |
| C | -1.09166300 | -0.10297900  | -0.41418300 |
| C | 1.59712200  | 3.92189300   | -0.20145800 |
| C | -0.91404300 | 4.09893400   | -0.34894600 |
| H | 1.47404000  | 4.99952800   | -0.29209100 |
| H | 2.23959600  | 3.57777300   | -1.01979700 |
| H | 2.09891900  | 3.70779200   | 0.74963300  |
| H | -1.45668100 | 3.91410500   | -1.28320900 |
| H | -0.63783700 | 5.15095900   | -0.31301700 |
| H | -1.58544500 | 3.88714000   | 0.49107100  |
| C | -1.46264800 | -14.28561100 | 1.70315100  |
| C | -2.54654000 | -13.41559200 | 1.74564800  |
| C | -2.33832900 | -12.03133500 | 1.64587000  |
| C | 0.05123200  | -12.41623200 | 1.45855400  |
| C | -0.16719400 | -13.79681000 | 1.56750600  |
| H | -1.62857300 | -15.35499200 | 1.77954900  |
| C | -3.43151100 | -11.10968500 | 1.71902800  |
| C | -4.33719600 | -10.30781100 | 1.79709800  |
| C | -7.77442100 | -8.88925800  | 2.09147300  |
| C | -7.50321500 | -7.52731000  | 2.13900900  |
| C | -6.17730300 | -7.07103800  | 2.06836800  |
| C | -5.41051400 | -9.36583700  | 1.90310900  |
| C | -6.73823200 | -9.81017700  | 1.97845900  |
| H | -8.80079700 | -9.23707300  | 2.14230100  |
| C | -5.90041100 | -5.66784200  | 2.13010400  |
| C | -5.69105900 | -4.47592100  | 2.19069000  |
| C | -6.45810800 | -0.83744300  | 2.36547500  |
| C | -5.18665500 | -0.29209700  | 2.49149800  |
| C | -4.05967000 | -1.13021200  | 2.50831600  |
| C | -5.50286400 | -3.05946100  | 2.27950400  |
| C | -6.62216600 | -2.21411800  | 2.26447500  |
| H | -7.32641300 | -0.18737100  | 2.34754900  |
| C | 2.31620800  | -1.09780300  | 0.19486400  |
| C | 3.29242100  | -1.79168900  | 0.37441900  |

|   |             |              |            |
|---|-------------|--------------|------------|
| C | 6.85167600  | -2.79340800  | 0.83482800 |
| C | 6.74432000  | -4.17828900  | 0.86019500 |
| C | 5.48586200  | -4.79138200  | 0.74509700 |
| C | 4.45660800  | -2.60434400  | 0.55857000 |
| C | 5.71647900  | -2.00189300  | 0.68855400 |
| H | 7.82721900  | -2.32696500  | 0.92650300 |
| C | 5.37557800  | -6.21726700  | 0.80132000 |
| C | 5.29640400  | -7.42468700  | 0.86460100 |
| C | 6.19527300  | -11.04363700 | 1.01729700 |
| C | 4.93939600  | -11.63064800 | 1.11602700 |
| C | 3.78882900  | -10.82659500 | 1.13461400 |
| C | 5.18172300  | -8.84942700  | 0.94750600 |
| C | 6.32468000  | -9.66110900  | 0.93417000 |
| H | 7.08187900  | -11.66859600 | 1.00043700 |
| C | 1.37539100  | -11.88619600 | 1.33511300 |
| C | 2.48656300  | -11.41111200 | 1.24231200 |
| C | -1.03941300 | -11.54080900 | 1.48734400 |
| C | -5.13504800 | -7.99348200  | 1.94082900 |
| C | -4.21750400 | -2.51474100  | 2.38862200 |
| C | 4.34343100  | -3.99953300  | 0.58668300 |
| C | 3.91558200  | -9.43749700  | 1.04544600 |
| H | -3.55540800 | -13.79642000 | 1.86270000 |
| H | 0.67963700  | -14.47395300 | 1.53825400 |
| H | -8.30799100 | -6.80615900  | 2.23375700 |
| H | -6.94584600 | -10.87416200 | 1.93916400 |
| H | -5.05130000 | 0.78063400   | 2.58004700 |
| H | -7.61180200 | -2.64747200  | 2.16625500 |
| H | 7.62708900  | -4.79785100  | 0.97679300 |
| H | 5.79273100  | -0.91968900  | 0.65792600 |
| H | 4.83638600  | -12.70853100 | 1.18101500 |
| H | 7.30345200  | -9.20169600  | 0.84791000 |
| H | -0.87744100 | -10.47381400 | 1.38119900 |
| H | -4.11152300 | -7.64252700  | 1.85714900 |
| H | -3.34940100 | -3.16585400  | 2.35535200 |
| H | 3.36871900  | -4.46476700  | 0.47822600 |
| H | 3.02869200  | -8.81253900  | 1.04917700 |
| C | 0.79283100  | 2.75270700   | 3.01896000 |
| C | -1.67531300 | -0.02368300  | 2.78690800 |
| C | -2.75704400 | -0.55300200  | 2.65041500 |
| C | 1.97412500  | 2.05748500   | 3.25673100 |
| C | 1.95922700  | 0.65744900   | 3.35568700 |
| C | -0.43030800 | 0.66488200   | 2.94449900 |
| C | -0.40566900 | 2.06653800   | 2.87030400 |
| H | 0.80543200  | 3.83624400   | 2.95492300 |
| C | 0.75543100  | -0.03665500  | 3.18924700 |
| H | 2.91132700  | 2.58896300   | 3.38491000 |
| H | -1.33276100 | 2.60175800   | 2.69130000 |
| H | 0.74082700  | -1.11961700  | 3.25538000 |
| C | 3.16457400  | -0.05150000  | 3.67776300 |

|    |             |              |             |
|----|-------------|--------------|-------------|
| C  | 4.18352900  | -0.63390300  | 4.00379000  |
| Si | 5.68984500  | -1.50493100  | 4.63754300  |
| C  | 7.21232100  | -0.71546400  | 3.87431900  |
| C  | 5.53327300  | -3.32657600  | 4.22554500  |
| C  | 5.73746100  | -1.26811800  | 6.50091700  |
| H  | 7.32764900  | 0.31114300   | 4.23403000  |
| H  | 7.15768700  | -0.69209200  | 2.78411100  |
| H  | 8.10772600  | -1.27694000  | 4.15922100  |
| H  | 5.32340500  | -3.47990500  | 3.16424600  |
| H  | 4.72185200  | -3.77717000  | 4.80479300  |
| H  | 6.46010900  | -3.85479400  | 4.47075700  |
| H  | 4.84802700  | -1.69143100  | 6.97553800  |
| H  | 5.79492500  | -0.20785100  | 6.76238600  |
| H  | 6.61661800  | -1.76872100  | 6.91916400  |
| C  | 0.00695000  | -14.34858000 | -1.80822600 |
| C  | 1.18589000  | -13.62302900 | -1.93206900 |
| C  | 1.14526100  | -12.22057700 | -1.97742800 |
| C  | -1.27082900 | -12.29640300 | -1.76893800 |
| C  | -1.21948400 | -13.69664300 | -1.72714100 |
| H  | 0.04365300  | -15.43217300 | -1.76864400 |
| C  | 2.35007800  | -11.45619600 | -2.09580800 |
| C  | 3.35829600  | -10.79033400 | -2.18872700 |
| C  | 6.94967900  | -9.81119100  | -2.44395100 |
| C  | 6.85041700  | -8.42614100  | -2.49720700 |
| C  | 5.58972700  | -7.80953500  | -2.45751600 |
| C  | 4.54218300  | -9.99183800  | -2.29532700 |
| C  | 5.80617300  | -10.59675800 | -2.34496600 |
| H  | 7.92619900  | -10.28289800 | -2.47582800 |
| C  | 5.48195600  | -6.38298100  | -2.52292200 |
| C  | 5.39722700  | -5.17544500  | -2.58083800 |
| C  | 6.42893900  | -1.59450800  | -2.62713200 |
| C  | 5.20524900  | -0.95804600  | -2.78860400 |
| C  | 4.02524700  | -1.71394100  | -2.88691200 |
| C  | 5.32364300  | -3.74700700  | -2.65035700 |
| C  | 6.49551500  | -2.98190000  | -2.55882900 |
| H  | 7.33757400  | -1.00659800  | -2.55056500 |
| C  | -2.34637400 | -0.77098700  | -0.61892800 |
| C  | -3.40273200 | -1.34523400  | -0.76561000 |
| C  | -7.05711300 | -1.96588500  | -1.14109000 |
| C  | -7.09405900 | -3.35422400  | -1.18508800 |
| C  | -5.90369700 | -4.09489400  | -1.10195800 |
| C  | -4.65033400 | -2.02995600  | -0.92178300 |
| C  | -5.84261600 | -1.29831500  | -1.01583400 |
| H  | -7.98064200 | -1.39931500  | -1.20328100 |
| C  | -5.93640400 | -5.52411000  | -1.17161000 |
| C  | -5.96192300 | -6.73332700  | -1.24300400 |
| C  | -7.21109200 | -10.24401900 | -1.39797200 |
| C  | -6.01885000 | -10.95183600 | -1.48633200 |
| C  | -4.79343300 | -10.26702600 | -1.49784900 |



|    |             |              |             |
|----|-------------|--------------|-------------|
| C  | -5.98230700 | -8.16238500  | -1.32495300 |
| C  | -7.20100200 | -8.85521100  | -1.32112200 |
| H  | -8.15553000 | -10.77790900 | -1.38608900 |
| C  | -2.52026900 | -11.60378900 | -1.67700300 |
| C  | -3.56255700 | -10.99149500 | -1.59409900 |
| C  | -0.08499200 | -11.56284700 | -1.89180700 |
| C  | 4.43915400  | -8.59682000  | -2.35195200 |
| C  | 4.08752900  | -3.10822200  | -2.81135700 |
| C  | -4.68113400 | -3.42999800  | -0.95562600 |
| C  | -4.77751000 | -8.87152100  | -1.40745300 |
| H  | 2.14297500  | -14.12990200 | -1.99389500 |
| H  | -2.13997800 | -14.26057100 | -1.62088700 |
| H  | 7.74078600  | -7.81115100  | -2.57294700 |
| H  | 5.88081400  | -11.67777300 | -2.29466000 |
| H  | 5.14763000  | 0.12376500   | -2.84418700 |
| H  | 7.44818300  | -3.48334800  | -2.42632800 |
| H  | -8.03862800 | -3.87708200  | -1.29083900 |
| H  | -5.80575200 | -0.21439600  | -0.97471500 |
| H  | -6.02255400 | -12.03481900 | -1.54845100 |
| H  | -8.12939400 | -8.29888800  | -1.24797700 |
| H  | -0.12162400 | -10.47886300 | -1.91501900 |
| H  | 3.46320500  | -8.12511200  | -2.30729200 |
| H  | 3.17824300  | -3.69688400  | -2.87478800 |
| H  | -3.76192100 | -3.99910200  | -0.84770800 |
| H  | -3.83422300 | -8.33352700  | -1.38961000 |
| C  | -0.29212700 | 2.69178800   | -3.54003900 |
| C  | 1.76046500  | -0.39279600  | -3.21765500 |
| C  | 2.77677100  | -1.03499800  | -3.06267600 |
| C  | -1.56061200 | 2.16562800   | -3.76118900 |
| C  | -1.74667300 | 0.77550900   | -3.81612700 |
| C  | 0.61964100  | 0.45334500   | -3.39930200 |
| C  | 0.79567200  | 1.84583200   | -3.36602800 |
| H  | -0.14923200 | 3.76738200   | -3.50869500 |
| C  | -0.65436700 | -0.07896300  | -3.62615500 |
| H  | -2.41197900 | 2.82194500   | -3.90867500 |
| H  | 1.78994800  | 2.24891500   | -3.20146100 |
| H  | -0.79602500 | -1.15438300  | -3.65900900 |
| C  | -3.04453600 | 0.24181800   | -4.11593200 |
| C  | -4.14310300 | -0.18730600  | -4.42020100 |
| Si | -5.77048200 | -0.83723900  | -5.01761800 |
| C  | -7.14982900 | 0.16137500   | -4.22925700 |
| C  | -5.86919800 | -2.65703700  | -4.58325000 |
| C  | -5.82203200 | -0.60675300  | -6.88177600 |
| H  | -7.08158200 | 1.21206700   | -4.52535100 |
| H  | -7.11618700 | 0.10826500   | -3.13897300 |
| H  | -8.12078800 | -0.22143200  | -4.55936700 |
| H  | -5.65214000 | -2.82103100  | -3.52469600 |
| H  | -5.14920700 | -3.23032100  | -5.17451000 |
| H  | -6.87001500 | -3.04801800  | -4.79198100 |

|    |             |              |              |             |
|----|-------------|--------------|--------------|-------------|
|    | H           | -5.00585300  | -1.14625300  | -7.36997600 |
|    | H           | -5.74430600  | 0.45022600   | -7.15121500 |
|    | H           | -6.76759500  | -0.98942400  | -7.27909600 |
| 4b | N           | 0.01929600   | -0.85692900  | -0.20034100 |
|    | C           | -0.02076000  | -2.33047600  | -0.23841800 |
|    | H           | 0.46558400   | -2.72283000  | 0.65603300  |
|    | H           | 0.51125800   | -2.68007000  | -1.12516000 |
|    | H           | -1.04994600  | -2.67821100  | -0.26109000 |
|    | O           | -0.28396900  | -5.12738800  | -0.93194800 |
|    | S           | -1.32778400  | -5.74855100  | -0.08153800 |
|    | O           | -2.21797800  | -6.67367900  | -0.82409400 |
|    | O           | -2.08046600  | -4.75745000  | 0.73175800  |
|    | C           | -0.42007000  | -6.76544500  | 1.08934700  |
|    | H           | 0.20974300   | -6.07781900  | 1.66373800  |
|    | H           | 0.23376700   | -7.40918900  | 0.49184800  |
|    | C           | -1.31940500  | -7.58953400  | 2.00008800  |
|    | H           | -2.03941700  | -6.92120600  | 2.48672100  |
|    | C           | -0.51167300  | -8.34057400  | 3.05712100  |
|    | H           | -1.89666200  | -8.29101700  | 1.38437600  |
|    | H           | 0.26835300   | -8.95763500  | 2.59645000  |
|    | H           | -1.15347800  | -8.99769400  | 3.65115600  |
|    | H           | -0.01837100  | -7.64027200  | 3.73782700  |
|    | C           | 1.22135200   | -0.22847200  | -0.01915000 |
|    | C           | 1.33333600   | 1.14274000   | -0.02959100 |
|    | H           | 2.31610700   | 1.56598700   | 0.12201000  |
|    | C           | 0.18311400   | 1.95428500   | -0.20010500 |
|    | N           | 0.26050800   | 3.29290400   | -0.20244700 |
|    | C           | -1.05064400  | 1.27791200   | -0.36773600 |
|    | H           | -1.97853800  | 1.81176300   | -0.51518700 |
|    | C           | -1.10375500  | -0.09942300  | -0.38458100 |
|    | C           | 1.56042300   | 3.94836800   | -0.12692100 |
|    | C           | -0.95677100  | 4.09169400   | -0.27344600 |
|    | H           | 1.41598900   | 5.02447200   | -0.18972500 |
|    | H           | 2.20026000   | 3.63428000   | -0.95778400 |
|    | H           | 2.06448800   | 3.71738200   | 0.81770400  |
|    | H           | -1.49232100  | 3.90847100   | -1.21083100 |
|    | H           | -0.69082500  | 5.14513000   | -0.22579900 |
|    | H           | -1.62047000  | 3.86018000   | 0.56588300  |
|    | C           | -1.45691100  | -14.29693500 | 1.77313000  |
| C  | -2.56660300 | -13.45850900 | 1.76879300   |             |
| C  | -2.39587700 | -12.07124900 | 1.64523700   |             |
| C  | 0.00824300  | -12.38771800 | 1.53007000   |             |
| C  | -0.17356700 | -13.77219300 | 1.66094000   |             |
| H  | -1.59332000 | -15.36909700 | 1.86793600   |             |
| C  | -3.51558700 | -11.17926100 | 1.67021200   |             |
| C  | -4.43877800 | -10.39505300 | 1.71239700   |             |
| C  | -7.86857600 | -8.92458900  | 1.84709600   |             |
| C  | -7.57492700 | -7.56915800  | 1.93315700   |             |
| C  | -6.23857500 | -7.13830800  | 1.93989700   |             |

|   |             |              |            |
|---|-------------|--------------|------------|
| C | -5.50829300 | -9.44523400  | 1.77572900 |
| C | -6.84582200 | -9.86488800  | 1.77221400 |
| H | -8.90282600 | -9.25251000  | 1.83794300 |
| C | -5.93241500 | -5.74361600  | 2.03898400 |
| C | -5.68769200 | -4.56023100  | 2.12704100 |
| C | -6.32989500 | -0.90332300  | 2.38785300 |
| C | -5.04039800 | -0.40530000  | 2.52100200 |
| C | -3.94192800 | -1.28148200  | 2.50988300 |
| C | -5.45002500 | -3.15374600  | 2.24558200 |
| C | -6.54001400 | -2.27126900  | 2.25559400 |
| H | -7.17575600 | -0.22406800  | 2.38854300 |
| C | 2.36666600  | -1.04932200  | 0.19147600 |
| C | 3.34440400  | -1.74294200  | 0.36294500 |
| C | 6.90539600  | -2.76774600  | 0.73590800 |
| C | 6.78097400  | -4.15028600  | 0.80004200 |
| C | 5.51200200  | -4.75122500  | 0.74818500 |
| C | 4.50763100  | -2.55619600  | 0.53921800 |
| C | 5.77640200  | -1.96365200  | 0.61013300 |
| H | 7.88980900  | -2.31309100  | 0.78022300 |
| C | 5.38083600  | -6.17284500  | 0.84756700 |
| C | 5.28085900  | -7.37657600  | 0.94364700 |
| C | 6.14321300  | -10.99497500 | 1.22222900 |
| C | 4.88064100  | -11.57004700 | 1.30107200 |
| C | 3.73515300  | -10.75849700 | 1.26563900 |
| C | 5.14740400  | -8.79726600  | 1.06292300 |
| C | 6.28447300  | -9.61621300  | 1.10479500 |
| H | 7.02535800  | -11.62609100 | 1.24594300 |
| C | 1.32302500  | -11.82845400 | 1.43252300 |
| C | 2.42951600  | -11.33928400 | 1.35623100 |
| C | -1.10753500 | -11.54428500 | 1.51334400 |
| C | -5.20970400 | -8.07939600  | 1.85117100 |
| C | -4.14487700 | -2.65641300  | 2.35604900 |
| C | 4.37543400  | -3.94849300  | 0.60870700 |
| C | 3.87385500  | -9.37310900  | 1.14175800 |
| H | -3.56683400 | -13.86634800 | 1.86798100 |
| H | 0.69332500  | -14.42422600 | 1.66741000 |
| H | -8.37042600 | -6.83443300  | 1.99834100 |
| H | -7.07176300 | -10.92367500 | 1.70368300 |
| H | -4.86755000 | 0.65967400   | 2.63464600 |
| H | -7.54390200 | -2.66954800  | 2.15299900 |
| H | 7.66020300  | -4.77784000  | 0.89946300 |
| H | 5.86478800  | -0.88375800  | 0.54772600 |
| H | 4.76756000  | -12.64509100 | 1.39230100 |
| H | 7.26833900  | -9.16522800  | 1.03260500 |
| H | -0.97477700 | -10.47453900 | 1.39214700 |
| H | -4.17601300 | -7.75014100  | 1.82810400 |
| H | -3.30018200 | -3.33610400  | 2.29199900 |
| H | 3.39163000  | -4.40286900  | 0.54659800 |
| H | 2.99172100  | -8.74225000  | 1.10529500 |

|    |             |              |             |
|----|-------------|--------------|-------------|
| C  | 0.81163600  | 2.65614800   | 3.07861700  |
| C  | -1.54538200 | -0.20674600  | 2.80292200  |
| C  | -2.62535900 | -0.73664700  | 2.65347200  |
| C  | 2.02482800  | 2.00635800   | 3.28471900  |
| C  | 2.06982900  | 0.60511400   | 3.35556400  |
| C  | -0.32349700 | 0.51920000   | 2.97433100  |
| C  | -0.35862400 | 1.92264300   | 2.92886300  |
| H  | 0.77712500  | 3.74059600   | 3.04070500  |
| C  | 0.89333900  | -0.13652000  | 3.19342500  |
| H  | 2.94086300  | 2.57408300   | 3.41108100  |
| H  | -1.31042700 | 2.42108100   | 2.77389600  |
| H  | 0.92569700  | -1.22018800  | 3.24353000  |
| C  | 3.30901600  | -0.05834600  | 3.64420500  |
| C  | 4.35706200  | -0.60333200  | 3.94118000  |
| Si | 5.90963600  | -1.41856700  | 4.53952600  |
| C  | 7.38368800  | -0.61583100  | 3.69781800  |
| C  | 5.77290300  | -3.25325000  | 4.18236300  |
| C  | 6.02255200  | -1.12911500  | 6.39241400  |
| H  | 7.49065100  | 0.42106300   | 4.02976100  |
| H  | 7.28809800  | -0.61865000  | 2.61012300  |
| H  | 8.30101700  | -1.15198800  | 3.96127500  |
| H  | 5.49697200  | -3.43674400  | 3.14094700  |
| H  | 5.01071900  | -3.70647500  | 4.82373600  |
| H  | 6.72583600  | -3.75522000  | 4.37848000  |
| H  | 5.16275100  | -1.56099700  | 6.91216300  |
| H  | 6.06408300  | -0.06114000  | 6.62374500  |
| H  | 6.92949600  | -1.59730000  | 6.78867200  |
| C  | 0.00669200  | -14.34121800 | -1.69909500 |
| C  | 1.19882800  | -13.63496100 | -1.80894200 |
| C  | 1.17852700  | -12.23354800 | -1.88428700 |
| C  | -1.24271500 | -12.27114400 | -1.73453300 |
| C  | -1.21189900 | -13.67106300 | -1.66250100 |
| H  | 0.02678100  | -15.42414400 | -1.63518100 |
| C  | 2.39333700  | -11.48397000 | -1.99169400 |
| C  | 3.40437100  | -10.82092500 | -2.07245200 |
| C  | 6.98958800  | -9.79421200  | -2.22819700 |
| C  | 6.87042900  | -8.41347900  | -2.33095500 |
| C  | 5.59915400  | -7.81777800  | -2.36112200 |
| C  | 4.58161900  | -10.01155400 | -2.16568700 |
| C  | 5.85580300  | -10.59607800 | -2.14684800 |
| H  | 7.97425700  | -10.24963200 | -2.20415700 |
| C  | 5.46849800  | -6.39583200  | -2.47243100 |
| C  | 5.36135300  | -5.19199700  | -2.56301000 |
| C  | 6.35776500  | -1.60575400  | -2.74264200 |
| C  | 5.12424700  | -0.98305000  | -2.87910900 |
| C  | 3.94798900  | -1.75062500  | -2.91993700 |
| C  | 5.26894500  | -3.76703600  | -2.67242900 |
| C  | 6.43673700  | -2.99034400  | -2.64066800 |
| H  | 7.26361600  | -1.00950700  | -2.71171700 |

|   |             |              |             |
|---|-------------|--------------|-------------|
| C | -2.34706000 | -0.76151900  | -0.60171400 |
| C | -3.40313500 | -1.32999500  | -0.77227100 |
| C | -7.05636600 | -1.93090300  | -1.13985100 |
| C | -7.09803100 | -3.31834000  | -1.20643500 |
| C | -5.91084300 | -4.06679400  | -1.15009400 |
| C | -4.64942000 | -2.01186600  | -0.94490300 |
| C | -5.83793300 | -1.27080000  | -1.01845800 |
| H | -7.97847300 | -1.36033700  | -1.18147600 |
| C | -5.95237900 | -5.49416000  | -1.24745800 |
| C | -5.97384900 | -6.70194100  | -1.33983100 |
| C | -7.18098700 | -10.21825100 | -1.64049500 |
| C | -5.97845500 | -10.91275600 | -1.67726500 |
| C | -4.76039700 | -10.21751800 | -1.60283500 |
| C | -5.97641000 | -8.12943600  | -1.45144300 |
| C | -7.18750700 | -8.83153200  | -1.53137700 |
| H | -8.11969100 | -10.75995900 | -1.69546700 |
| C | -2.48489000 | -11.56086200 | -1.68916500 |
| C | -3.52361000 | -10.93819200 | -1.64674900 |
| C | -0.04397800 | -11.55709000 | -1.84243000 |
| C | 4.45842700  | -8.62100200  | -2.27393500 |
| C | 4.02231900  | -3.14223500  | -2.80954600 |
| C | -4.68227300 | -3.41155100  | -1.00198100 |
| C | -4.75960900 | -8.82379000  | -1.48130200 |
| H | 2.14969500  | -14.15639900 | -1.83623700 |
| H | -2.14252700 | -14.22026000 | -1.56790000 |
| H | 7.75327800  | -7.78600500  | -2.39073600 |
| H | 5.94607600  | -11.67339300 | -2.05620800 |
| H | 5.05524400  | 0.09644600   | -2.96073400 |
| H | 7.39722300  | -3.48155500  | -2.52728800 |
| H | -8.04613000 | -3.83524500  | -1.31045500 |
| H | -5.79508300 | -0.18777700  | -0.96108000 |
| H | -5.96770500 | -11.99404300 | -1.76502500 |
| H | -8.12345400 | -8.28378000  | -1.49855300 |
| H | -0.06440300 | -10.47336000 | -1.88832000 |
| H | 3.47369400  | -8.16546600  | -2.28376500 |
| H | 3.11596500  | -3.73863200  | -2.82691800 |
| H | -3.76451700 | -3.98461900  | -0.89736700 |
| H | -3.82541800 | -8.27399900  | -1.39528500 |
| C | -0.34834300 | 2.67607200   | -3.48084200 |
| C | 1.67708100  | -0.43097900  | -3.21093600 |
| C | 2.69238200  | -1.07881100  | -3.07263700 |
| C | -1.62516400 | 2.16487400   | -3.69071800 |
| C | -1.82595200 | 0.77726600   | -3.75900500 |
| C | 0.54203000  | 0.42683800   | -3.37364900 |
| C | 0.73318000  | 1.81744700   | -3.32857700 |
| H | -0.19351200 | 3.74992400   | -3.44420300 |
| C | -0.74005700 | -0.09047400  | -3.59180800 |
| H | -2.47126200 | 2.83130500   | -3.82190900 |
| H | 1.73403000  | 2.20884200   | -3.17587300 |

|  |    |             |              |             |
|--|----|-------------|--------------|-------------|
|  | H  | -0.89243300 | -1.16395400  | -3.63871100 |
|  | C  | -3.13160800 | 0.26160100   | -4.05510500 |
|  | C  | -4.23661700 | -0.14825400  | -4.36201500 |
|  | Si | -5.87098800 | -0.76588100  | -4.97744800 |
|  | C  | -7.24022500 | 0.22059500   | -4.15613100 |
|  | C  | -5.97424300 | -2.59894600  | -4.60407000 |
|  | C  | -5.92436800 | -0.47217400  | -6.83258000 |
|  | H  | -7.16993800 | 1.27626500   | -4.43378100 |
|  | H  | -7.19789700 | 0.14825300   | -3.06744600 |
|  | H  | -8.21545500 | -0.15193700  | -4.48533000 |
|  | H  | -5.72932100 | -2.80157700  | -3.55835500 |
|  | H  | -5.27342400 | -3.15509500  | -5.23381900 |
|  | H  | -6.98255500 | -2.97718400  | -4.79958800 |
|  | H  | -5.11326300 | -1.00079400  | -7.34072100 |
|  | H  | -5.84034300 | 0.59287400   | -7.06627300 |
|  | H  | -6.87364300 | -0.83494200  | -7.23968500 |
|  | N  | -0.00406700 | -0.80615000  | -0.19085600 |
|  | C  | -0.19014700 | -3.64218200  | -0.60944800 |
|  | H  | 0.09234100  | -3.46188000  | 0.42757400  |
|  | H  | 0.60766700  | -3.31253100  | -1.27048400 |
|  | H  | -1.11425800 | -3.11538600  | -0.83610000 |
|  | O  | -0.34010600 | -5.06490800  | -0.87031800 |
|  | S  | -1.40869000 | -5.86741500  | 0.01098700  |
|  | O  | -2.10808700 | -6.76648400  | -0.89583300 |
|  | O  | -2.19028200 | -4.92201400  | 0.80227000  |
|  | C  | -0.35286300 | -6.81676500  | 1.08721900  |
|  | H  | 0.27527100  | -6.09178000  | 1.61338100  |
|  | H  | 0.27372400  | -7.42571900  | 0.42937600  |
|  | C  | -1.18207100 | -7.66143900  | 2.04814600  |
|  | H  | -1.82999400 | -7.00255700  | 2.63852500  |
|  | C  | -0.29499800 | -8.48453700  | 2.98080400  |
|  | H  | -1.83402500 | -8.33096700  | 1.47070400  |
|  | H  | 0.33527500  | -9.16306500  | 2.38785300  |
|  | C  | -1.11650200 | -9.29219800  | 3.98448000  |
|  | H  | 0.39301900  | -7.81997900  | 3.51853000  |
|  | H  | -1.61574400 | -8.60203700  | 4.67550000  |
|  | C  | -0.25814000 | -10.28736800 | 4.75917000  |
|  | H  | -1.91609700 | -9.82586900  | 3.45403900  |
|  | H  | 0.21005500  | -11.00210300 | 4.07326300  |
|  | H  | -0.85208500 | -10.85127500 | 5.48284500  |
|  | H  | 0.54112500  | -9.77452600  | 5.30350400  |
|  | C  | 1.16647400  | -0.17402400  | -0.01900300 |
|  | C  | 1.33125200  | 1.20722100   | -0.03929300 |
|  | H  | 2.32016700  | 1.62085400   | 0.10857300  |
|  | C  | 0.20095300  | 2.03046000   | -0.22329400 |
|  | N  | 0.29964300  | 3.38583100   | -0.24484400 |
|  | C  | -1.03694000 | 1.37408300   | -0.38722900 |
|  | H  | -1.95691900 | 1.92074400   | -0.54659300 |
|  | C  | -1.07273800 | -0.01632800  | -0.37822100 |

3c

|   |             |              |             |
|---|-------------|--------------|-------------|
| C | 1.60555100  | 4.01535400   | -0.17781500 |
| C | -0.90365900 | 4.19406400   | -0.31867700 |
| H | 1.48457800  | 5.09426800   | -0.26049900 |
| H | 2.24795000  | 3.67712500   | -0.99954900 |
| H | 2.11273900  | 3.79504900   | 0.76969200  |
| H | -1.45369600 | 4.01079000   | -1.24962300 |
| H | -0.62814900 | 5.24675400   | -0.28423000 |
| H | -1.57295100 | 3.98358500   | 0.52409900  |
| C | -1.49955200 | -14.37356300 | 1.71371100  |
| C | -2.60674100 | -13.53133400 | 1.70603700  |
| C | -2.43031200 | -12.14525800 | 1.58144900  |
| C | -0.02573000 | -12.47143300 | 1.47581700  |
| C | -0.21295600 | -13.85473200 | 1.60891900  |
| H | -1.64068000 | -15.44496100 | 1.80930500  |
| C | -3.53862800 | -11.23925400 | 1.61492200  |
| C | -4.43458000 | -10.42446600 | 1.67284600  |
| C | -7.83251200 | -8.88571000  | 1.79653700  |
| C | -7.51354300 | -7.53798600  | 1.90526600  |
| C | -6.16939100 | -7.13254300  | 1.94181900  |
| C | -5.48229500 | -9.45112300  | 1.74847300  |
| C | -6.82732400 | -9.84456800  | 1.72048500  |
| H | -8.87271500 | -9.19267500  | 1.76745200  |
| C | -5.84779700 | -5.74264100  | 2.06322600  |
| C | -5.61335000 | -4.55795100  | 2.16432800  |
| C | -6.35353000 | -0.92135700  | 2.42439000  |
| C | -5.07917200 | -0.38481800  | 2.55694100  |
| C | -3.95497900 | -1.22706400  | 2.55490200  |
| C | -5.40928400 | -3.14588200  | 2.29036200  |
| C | -6.52437700 | -2.29442700  | 2.29457400  |
| H | -7.21853600 | -0.26666800  | 2.41949200  |
| C | 2.31310800  | -1.01689000  | 0.20375800  |
| C | 3.27911700  | -1.72748000  | 0.37548600  |
| C | 6.83149200  | -2.79617300  | 0.75245100  |
| C | 6.69750100  | -4.17708200  | 0.82151400  |
| C | 5.42269500  | -4.76414100  | 0.76726300  |
| C | 4.43146900  | -2.56017200  | 0.54760100  |
| C | 5.70837200  | -1.98488800  | 0.62000100  |
| H | 7.81886000  | -2.34784000  | 0.79829600  |
| C | 5.28366500  | -6.18545500  | 0.86881400  |
| C | 5.18535800  | -7.38896700  | 0.97208600  |
| C | 6.09494300  | -10.99222700 | 1.29045900  |
| C | 4.84053900  | -11.58744400 | 1.34402500  |
| C | 3.68389700  | -10.79417800 | 1.27971000  |
| C | 5.06821800  | -8.81066800  | 1.09695300  |
| C | 6.21652900  | -9.61209100  | 1.16828000  |
| H | 6.98640900  | -11.60871700 | 1.33698500  |
| C | 1.28707700  | -11.90499400 | 1.39431400  |
| C | 2.38622100  | -11.39604200 | 1.34190900  |
| C | -1.13914300 | -11.62589200 | 1.44861700  |

|    |             |              |             |
|----|-------------|--------------|-------------|
| C  | -5.15835700 | -8.09305300  | 1.85722000  |
| C  | -4.12146600 | -2.60868200  | 2.41106600  |
| C  | 4.29298200  | -3.95179100  | 0.62294000  |
| C  | 3.80307200  | -9.40713700  | 1.15258200  |
| H  | -3.60820100 | -13.93596800 | 1.80496600  |
| H  | 0.65104700  | -14.51023500 | 1.62406900  |
| H  | -8.29529800 | -6.78840000  | 1.96683700  |
| H  | -7.07209600 | -10.89737400 | 1.62921300  |
| H  | -4.93817800 | 0.68561400   | 2.66282800  |
| H  | -7.51587700 | -2.72108000  | 2.18680900  |
| H  | 7.57016900  | -4.81292900  | 0.92634300  |
| H  | 5.80729400  | -0.90602000  | 0.55418300  |
| H  | 4.74243700  | -12.66364400 | 1.43819300  |
| H  | 7.19453400  | -9.14590500  | 1.11470200  |
| H  | -1.00080300 | -10.55772200 | 1.31797800  |
| H  | -4.11831500 | -7.78470800  | 1.87137100  |
| H  | -3.25716800 | -3.26352700  | 2.37312000  |
| H  | 3.30631800  | -4.40013200  | 0.56421700  |
| H  | 2.91188700  | -8.79060600  | 1.09630800  |
| C  | 0.80045800  | 2.75433700   | 3.05352100  |
| C  | -1.58066000 | -0.09652500  | 2.82557600  |
| C  | -2.65260000 | -0.64697000  | 2.69433500  |
| C  | 2.00629000  | 2.09705500   | 3.27452900  |
| C  | 2.03894400  | 0.69658200   | 3.36109200  |
| C  | -0.35432200 | 0.62744800   | 2.97691000  |
| C  | -0.37582100 | 2.02957100   | 2.91090000  |
| H  | 0.77703000  | 3.83794600   | 2.99437000  |
| C  | 0.85662700  | -0.03567300  | 3.20323400  |
| H  | 2.92711100  | 2.65822800   | 3.39557400  |
| H  | -1.32081300 | 2.53497200   | 2.73984700  |
| H  | 0.88008500  | -1.11895900  | 3.25582800  |
| C  | 3.27197800  | 0.02409400   | 3.65735200  |
| C  | 4.31424200  | -0.53009500  | 3.95826600  |
| Si | 5.85380800  | -1.37336500  | 4.54695600  |
| C  | 7.34022300  | -0.59849800  | 3.70100700  |
| C  | 5.69008400  | -3.20676800  | 4.19129300  |
| C  | 5.98515100  | -1.09051400  | 6.39997900  |
| H  | 7.46440200  | 0.43843200   | 4.02672600  |
| H  | 7.24452200  | -0.60701600  | 2.61337400  |
| H  | 8.24864300  | -1.14804500  | 3.96776800  |
| H  | 5.39300100  | -3.38735400  | 3.15530600  |
| H  | 4.93746200  | -3.65266600  | 4.84837600  |
| H  | 6.64192800  | -3.71756000  | 4.36841500  |
| H  | 5.12079000  | -1.50624300  | 6.92504800  |
| H  | 6.04959800  | -0.02425100  | 6.63381500  |
| H  | 6.88518900  | -1.57772200  | 6.78880900  |
| C  | 0.01470100  | -14.38774500 | -1.76491400 |
| C  | 1.20664000  | -13.67858000 | -1.85802400 |
| C  | 1.18470200  | -12.27657600 | -1.92081600 |



|   |             |              |             |
|---|-------------|--------------|-------------|
| C | -1.23855300 | -12.32016300 | -1.79306200 |
| C | -1.20570500 | -13.72051500 | -1.73203500 |
| H | 0.03649900  | -15.47113000 | -1.71050600 |
| C | 2.39858600  | -11.52192600 | -2.00445200 |
| C | 3.40465000  | -10.84932900 | -2.06860900 |
| C | 6.98332800  | -9.79219200  | -2.14748000 |
| C | 6.85521400  | -8.41354900  | -2.26366700 |
| C | 5.58024200  | -7.82842600  | -2.32836400 |
| C | 4.57699800  | -10.03022200 | -2.14091100 |
| C | 5.85489600  | -10.60356300 | -2.08704300 |
| H | 7.97080700  | -10.23876800 | -2.09634400 |
| C | 5.44256100  | -6.40790700  | -2.45160600 |
| C | 5.33282200  | -5.20478000  | -2.55032900 |
| C | 6.34631300  | -1.62443200  | -2.72357400 |
| C | 5.11679900  | -0.99581500  | -2.86870800 |
| C | 3.93606700  | -1.75564100  | -2.91986300 |
| C | 5.24705000  | -3.77918700  | -2.66227000 |
| C | 6.41862700  | -3.00922200  | -2.62098200 |
| H | 7.25446800  | -1.03213200  | -2.68577900 |
| C | -2.32785400 | -0.69332000  | -0.58440600 |
| C | -3.37982300 | -1.27495000  | -0.73864100 |
| C | -7.03485800 | -1.94635200  | -1.07387400 |
| C | -7.05182800 | -3.33357500  | -1.15470100 |
| C | -5.84740300 | -4.05462300  | -1.11942700 |
| C | -4.62167600 | -1.97104500  | -0.90043900 |
| C | -5.82939200 | -1.26093000  | -0.95316300 |
| H | -7.96835900 | -1.39341800  | -1.10180900 |
| C | -5.85581700 | -5.48242200  | -1.23134200 |
| C | -5.86924300 | -6.68953400  | -1.33884200 |
| C | -7.15599200 | -10.17330700 | -1.67320500 |
| C | -5.97231800 | -10.89958500 | -1.72007200 |
| C | -4.73779700 | -10.23579700 | -1.64528400 |
| C | -5.89936200 | -8.11604600  | -1.46662600 |
| C | -7.12729800 | -8.78817100  | -1.54987000 |
| H | -8.10849300 | -10.68969800 | -1.73016900 |
| C | -2.48073900 | -11.60945200 | -1.74659500 |
| C | -3.51459700 | -10.97891900 | -1.69927500 |
| C | -0.03985900 | -11.60337100 | -1.88496600 |
| C | 4.44500300  | -8.64141500  | -2.26272400 |
| C | 4.00525200  | -3.14780200  | -2.81195100 |
| C | -4.63532000 | -3.36934800  | -0.98135600 |
| C | -4.70352000 | -8.84358500  | -1.51183200 |
| H | 2.15840400  | -14.19849100 | -1.88121700 |
| H | -2.13562800 | -14.27265300 | -1.64839200 |
| H | 7.73401000  | -7.77921800  | -2.30775300 |
| H | 5.95224600  | -11.67926100 | -1.98655700 |
| H | 5.05392300  | 0.08422800   | -2.94850400 |
| H | 7.37560000  | -3.50517200  | -2.49943400 |
| H | -7.99005200 | -3.86912800  | -1.25382500 |

|      |    |             |              |             |
|------|----|-------------|--------------|-------------|
|      | H  | -5.81211500 | -0.17815500  | -0.87959900 |
|      | H  | -5.98999900 | -11.97992300 | -1.81691900 |
|      | H  | -8.04913600 | -8.21791200  | -1.50688000 |
|      | H  | -0.06178100 | -10.51927400 | -1.92219600 |
|      | H  | 3.45697900  | -8.19510600  | -2.30199000 |
|      | H  | 3.09798400  | -3.74180500  | -2.84269100 |
|      | H  | -3.70582000 | -3.92434600  | -0.91279600 |
|      | H  | -3.75360900 | -8.32371600  | -1.43556300 |
|      | C  | -0.32022600 | 2.70765500   | -3.51892400 |
|      | C  | 1.67887100  | -0.41440000  | -3.22023600 |
|      | C  | 2.68566400  | -1.07474100  | -3.07881100 |
|      | C  | -1.60033600 | 2.20588900   | -3.72774400 |
|      | C  | -1.81402500 | 0.81959600   | -3.77774800 |
|      | C  | 0.55027800  | 0.45191900   | -3.38611300 |
|      | C  | 0.75243500  | 1.84084800   | -3.35466000 |
|      | H  | -0.15672100 | 3.78027600   | -3.48778300 |
|      | C  | -0.73661400 | -0.05552900  | -3.59679300 |
|      | H  | -2.44039300 | 2.87829900   | -3.86759800 |
|      | H  | 1.75491900  | 2.22538200   | -3.19592100 |
|      | H  | -0.90005800 | -1.12794700  | -3.62128400 |
|      | C  | -3.12574200 | 0.31270500   | -4.06495400 |
|      | C  | -4.23563200 | -0.09232300  | -4.36160900 |
|      | Si | -5.88023600 | -0.71644000  | -4.93834400 |
|      | C  | -7.23875100 | 0.25534900   | -4.08149800 |
|      | C  | -5.97117000 | -2.55056700  | -4.56551200 |
|      | C  | -5.98284100 | -0.42110000  | -6.79134000 |
|      | H  | -7.18467100 | 1.31332200   | -4.35381200 |
|      | H  | -7.16999600 | 0.17553600   | -2.99460400 |
|      | H  | -8.21811600 | -0.12422200  | -4.39003500 |
|      | H  | -5.71814700 | -2.75151300  | -3.52146600 |
|      | H  | -5.27470100 | -3.10505100  | -5.20126700 |
|      | H  | -6.98017200 | -2.93163400  | -4.75243600 |
|      | H  | -5.17918300 | -0.94108800  | -7.31982500 |
|      | H  | -5.91429600 | 0.64492400   | -7.02533600 |
|      | H  | -6.93811000 | -0.79194100  | -7.17647900 |
| TS-c | N  | -0.00941000 | -0.82651600  | -0.22204400 |
|      | C  | -0.07078600 | -2.85425800  | -0.45178000 |
|      | H  | 0.23124500  | -2.95303700  | 0.57960800  |
|      | H  | 0.68132600  | -2.74896700  | -1.22064100 |
|      | H  | -1.11630000 | -2.75379500  | -0.69022900 |
|      | O  | -0.09000800 | -4.69885800  | -0.74744600 |
|      | S  | -1.17052100 | -5.50426600  | -0.02217200 |
|      | O  | -1.92914400 | -6.33895200  | -0.96476500 |
|      | O  | -1.98487200 | -4.63214400  | 0.84199000  |
|      | C  | -0.22971200 | -6.59095500  | 1.04237400  |
|      | H  | 0.40711500  | -5.93568600  | 1.64433800  |
|      | H  | 0.40786900  | -7.18864400  | 0.38413600  |
|      | C  | -1.12153300 | -7.46037300  | 1.91890800  |
|      | H  | -1.78843300 | -6.81201000  | 2.50044900  |

|   |             |              |             |
|---|-------------|--------------|-------------|
| C | -0.29857600 | -8.33638700  | 2.86176400  |
| H | -1.75533100 | -8.09026400  | 1.28032000  |
| H | 0.32070400  | -9.02987400  | 2.27355600  |
| C | -1.16606400 | -9.12724000  | 3.83977900  |
| H | 0.40346300  | -7.70930500  | 3.42734600  |
| H | -1.67555200 | -8.42601500  | 4.51222800  |
| C | -0.34848900 | -10.13018800 | 4.64788900  |
| H | -1.95836500 | -9.65043900  | 3.28812200  |
| H | 0.14353900  | -10.84771700 | 3.98180700  |
| H | -0.97436300 | -10.69143800 | 5.34659100  |
| H | 0.43174300  | -9.62259600  | 5.22433200  |
| C | 1.17115900  | -0.20948800  | -0.03035200 |
| C | 1.32324300  | 1.16877500   | -0.03292400 |
| H | 2.30998800  | 1.58105200   | 0.12893200  |
| C | 0.18992300  | 1.99284200   | -0.21405900 |
| N | 0.28789300  | 3.34174000   | -0.22924700 |
| C | -1.05077900 | 1.33701600   | -0.37787500 |
| H | -1.97335000 | 1.88314300   | -0.51953300 |
| C | -1.09532100 | -0.04903100  | -0.39261800 |
| C | 1.59510300  | 3.97329700   | -0.15888000 |
| C | -0.91622800 | 4.15234800   | -0.30657800 |
| H | 1.47244000  | 5.05140200   | -0.24387900 |
| H | 2.23775400  | 3.63308300   | -0.97868600 |
| H | 2.09623100  | 3.75405300   | 0.79140600  |
| H | -1.46223400 | 3.96570600   | -1.23851100 |
| H | -0.63863200 | 5.20409700   | -0.27443500 |
| H | -1.58461700 | 3.94360000   | 0.53651500  |
| C | -1.49799900 | -14.38791000 | 1.70553400  |
| C | -2.60431000 | -13.54481600 | 1.70623700  |
| C | -2.42744500 | -12.15769000 | 1.59262700  |
| C | -0.02405600 | -12.48450400 | 1.48003500  |
| C | -0.21151600 | -13.86865000 | 1.60174400  |
| H | -1.63957300 | -15.45996900 | 1.79258500  |
| C | -3.53739000 | -11.25415500 | 1.63005100  |
| C | -4.43527400 | -10.44194200 | 1.69043500  |
| C | -7.83504500 | -8.90887100  | 1.81769500  |
| C | -7.51820200 | -7.56082500  | 1.92735500  |
| C | -6.17469300 | -7.15305900  | 1.96356000  |
| C | -5.48346300 | -9.46966900  | 1.76909400  |
| C | -6.82785800 | -9.86539100  | 1.74018600  |
| H | -8.87468300 | -9.21778100  | 1.78873200  |
| C | -5.85716400 | -5.76192200  | 2.08079400  |
| C | -5.62436100 | -4.57646100  | 2.17588400  |
| C | -6.35889400 | -0.93857800  | 2.44841600  |
| C | -5.08243200 | -0.40467100  | 2.57014700  |
| C | -3.96058400 | -1.25001600  | 2.55135800  |
| C | -5.41952800 | -3.16430600  | 2.29786100  |
| C | -6.53308100 | -2.31141900  | 2.31671500  |
| H | -7.22307700 | -0.28285300  | 2.45613000  |

|   |             |              |            |
|---|-------------|--------------|------------|
| C | 2.31327900  | -1.05000900  | 0.19647100 |
| C | 3.28087800  | -1.75626000  | 0.37402300 |
| C | 6.83083400  | -2.81685400  | 0.76767200 |
| C | 6.69720300  | -4.19801100  | 0.83283100 |
| C | 5.42406300  | -4.78824500  | 0.77119300 |
| C | 4.43336500  | -2.58657000  | 0.55235300 |
| C | 5.70747200  | -2.00653300  | 0.63292000 |
| H | 7.81763400  | -2.36820100  | 0.81906200 |
| C | 5.28858800  | -6.20950600  | 0.87210800 |
| C | 5.19217900  | -7.41309700  | 0.97402300 |
| C | 6.09960300  | -11.01711600 | 1.29062800 |
| C | 4.84435900  | -11.61051600 | 1.34595200 |
| C | 3.68870900  | -10.81571800 | 1.28284100 |
| C | 5.07527400  | -8.83466400  | 1.09871900 |
| C | 6.22295800  | -9.63708500  | 1.16848700 |
| H | 6.99023800  | -11.63496600 | 1.33530100 |
| C | 1.28943800  | -11.92015600 | 1.39876500 |
| C | 2.39001800  | -11.41467600 | 1.34596200 |
| C | -1.13640700 | -11.63698000 | 1.46288400 |
| C | -5.16092600 | -8.11111800  | 1.87932200 |
| C | -4.12888900 | -2.63024400  | 2.40176600 |
| C | 4.29357500  | -3.97796600  | 0.62144800 |
| C | 3.80942600  | -9.42904000  | 1.15515400 |
| H | -3.60606700 | -13.94938400 | 1.80265700 |
| H | 0.65238600  | -14.52440700 | 1.60878100 |
| H | -8.30118900 | -6.81249500  | 1.98930200 |
| H | -7.07052500 | -10.91854800 | 1.64722700 |
| H | -4.93825400 | 0.66478700   | 2.68161400 |
| H | -7.52664900 | -2.73614200  | 2.22030900 |
| H | 7.57045700  | -4.83248700  | 0.94061700 |
| H | 5.80397200  | -0.92726300  | 0.57142200 |
| H | 4.74482600  | -12.68662700 | 1.43973900 |
| H | 7.20140100  | -9.17201600  | 1.11330600 |
| H | -0.99736400 | -10.56717700 | 1.34459000 |
| H | -4.12113000 | -7.80019000  | 1.89210700 |
| H | -3.26539600 | -3.28504000  | 2.34176800 |
| H | 3.30722600  | -4.42568900  | 0.55080400 |
| H | 2.91913800  | -8.81120300  | 1.09877300 |
| C | 0.80376500  | 2.71332400   | 3.06605600 |
| C | -1.58012600 | -0.13263800  | 2.81890000 |
| C | -2.65517300 | -0.67670600  | 2.68686600 |
| C | 2.00954300  | 2.05286300   | 3.27901600 |
| C | 2.04106200  | 0.65160300   | 3.35398100 |
| C | -0.35256900 | 0.58799800   | 2.97226300 |
| C | -0.37356500 | 1.99092200   | 2.91965000 |
| H | 0.78086600  | 3.79755600   | 3.01877100 |
| C | 0.85804200  | -0.07846700  | 3.19087200 |
| H | 2.93080000  | 2.61215500   | 3.40503700 |
| H | -1.31928900 | 2.49837400   | 2.75832000 |

|    |             |              |             |
|----|-------------|--------------|-------------|
| H  | 0.88006100  | -1.16236600  | 3.23679400  |
| C  | 3.27252500  | -0.02388500  | 3.64858600  |
| C  | 4.31316900  | -0.57965300  | 3.95174700  |
| Si | 5.84761200  | -1.42569300  | 4.55089100  |
| C  | 7.33965900  | -0.65383400  | 3.71246300  |
| C  | 5.67701500  | -3.25866700  | 4.19693300  |
| C  | 5.96824200  | -1.13968400  | 6.40401700  |
| H  | 7.46574000  | 0.38140300   | 4.04284600  |
| H  | 7.24794900  | -0.65713100  | 2.62454200  |
| H  | 8.24538600  | -1.20721000  | 3.98023000  |
| H  | 5.37820800  | -3.43914100  | 3.16151300  |
| H  | 4.92220800  | -3.70003200  | 4.85458800  |
| H  | 6.62628100  | -3.77398800  | 4.37438100  |
| H  | 5.09958200  | -1.55211400  | 6.92452800  |
| H  | 6.03439700  | -0.07320200  | 6.63633500  |
| H  | 6.86456400  | -1.62878100  | 6.79897100  |
| C  | 0.01056100  | -14.41462500 | -1.76593700 |
| C  | 1.20759500  | -13.71373700 | -1.85732200 |
| C  | 1.19560100  | -12.31154200 | -1.91538400 |
| C  | -1.22721400 | -12.33777100 | -1.78467000 |
| C  | -1.20477600 | -13.73860100 | -1.72954500 |
| H  | 0.02442700  | -15.49830800 | -1.71550100 |
| C  | 2.41331500  | -11.56357400 | -1.99961300 |
| C  | 3.42077600  | -10.89320300 | -2.06350800 |
| C  | 6.99698300  | -9.82653800  | -2.14173500 |
| C  | 6.86453500  | -8.44801500  | -2.25546700 |
| C  | 5.58768400  | -7.86707100  | -2.31829200 |
| C  | 4.59141200  | -10.07194600 | -2.13433300 |
| C  | 5.87113000  | -10.64143000 | -2.08224300 |
| H  | 7.98585400  | -10.27010000 | -2.09166900 |
| C  | 5.44361400  | -6.44722800  | -2.43940400 |
| C  | 5.32559200  | -5.24496600  | -2.53736200 |
| C  | 6.31455100  | -1.65824800  | -2.71758200 |
| C  | 5.08087900  | -1.03827300  | -2.86363100 |
| C  | 3.90559300  | -1.80694300  | -2.91000200 |
| C  | 5.22908100  | -3.82044600  | -2.64935900 |
| C  | 6.39547600  | -3.04230900  | -2.61210800 |
| H  | 7.21892200  | -1.06011800  | -2.68220500 |
| C  | -2.35026100 | -0.71694100  | -0.59835800 |
| C  | -3.40430200 | -1.29503200  | -0.74703600 |
| C  | -7.05629400 | -1.97040300  | -1.06405800 |
| C  | -7.06940800 | -3.35776500  | -1.14125800 |
| C  | -5.86402200 | -4.07763400  | -1.10683300 |
| C  | -4.64435200 | -1.99462500  | -0.89951200 |
| C  | -5.85135100 | -1.28337000  | -0.95019500 |
| H  | -7.99090800 | -1.41948800  | -1.09120800 |
| C  | -5.87308300 | -5.50481200  | -1.21593200 |
| C  | -5.88195500 | -6.71174300  | -1.32221300 |
| C  | -7.14058600 | -10.20367500 | -1.66394200 |

|    |             |              |             |
|----|-------------|--------------|-------------|
| C  | -5.95071100 | -10.91921700 | -1.70916700 |
| C  | -4.72105100 | -10.24644300 | -1.62849800 |
| C  | -5.90087000 | -8.13751700  | -1.44962300 |
| C  | -7.12328200 | -8.81873300  | -1.53827000 |
| H  | -8.08853600 | -10.72786900 | -1.72521700 |
| C  | -2.46433000 | -11.61906000 | -1.73391600 |
| C  | -3.49570200 | -10.98500300 | -1.68330000 |
| C  | -0.02385300 | -11.62938000 | -1.87535800 |
| C  | 4.45490800  | -8.68348400  | -2.25319800 |
| C  | 3.98226000  | -3.19799300  | -2.79563800 |
| C  | -4.65090200 | -3.39353600  | -0.97235300 |
| C  | -4.69853300 | -8.85458400  | -1.49048600 |
| H  | 2.15553000  | -14.24043400 | -1.88330700 |
| H  | -2.13875400 | -14.28402300 | -1.64710500 |
| H  | 7.74128200  | -7.81079000  | -2.29879800 |
| H  | 5.97172100  | -11.71700900 | -1.98367900 |
| H  | 5.01045800  | 0.04096400   | -2.94759800 |
| H  | 7.35584400  | -3.53195100  | -2.49171300 |
| H  | -8.00674400 | -3.89541200  | -1.23718300 |
| H  | -5.83367800 | -0.20029600  | -0.88204700 |
| H  | -5.95880200 | -11.99928600 | -1.80959200 |
| H  | -8.04938700 | -8.25525200  | -1.49830300 |
| H  | -0.03763000 | -10.54511500 | -1.90828800 |
| H  | 3.46555500  | -8.23992800  | -2.29003800 |
| H  | 3.07755000  | -3.79680100  | -2.81706600 |
| H  | -3.71964200 | -3.94804300  | -0.90081200 |
| H  | -3.75335900 | -8.32593100  | -1.40677200 |
| C  | -0.33913700 | 2.65868800   | -3.51140900 |
| C  | 1.64548800  | -0.47301300  | -3.21829500 |
| C  | 2.65179500  | -1.13328200  | -3.07187400 |
| C  | -1.62127400 | 2.16293500   | -3.72344900 |
| C  | -1.84011800 | 0.77766900   | -3.78115800 |
| C  | 0.52187100  | 0.39894000   | -3.38751500 |
| C  | 0.73018300  | 1.78701400   | -3.34892900 |
| H  | -0.17100500 | 3.73054400   | -3.47740500 |
| C  | -0.76616400 | -0.10259300  | -3.60493000 |
| H  | -2.45834700 | 2.83944200   | -3.86088100 |
| H  | 1.73418600  | 2.16683100   | -3.18841200 |
| H  | -0.93314300 | -1.17425600  | -3.64039000 |
| C  | -3.15254500 | 0.27447900   | -4.06986600 |
| C  | -4.26300000 | -0.12989700  | -4.36450600 |
| Si | -5.90807400 | -0.75365100  | -4.94160600 |
| C  | -7.26408100 | 0.23000100   | -4.09501400 |
| C  | -6.00200400 | -2.58431300  | -4.55365700 |
| C  | -6.00336700 | -0.47233000  | -6.79696100 |
| H  | -7.20491700 | 1.28537100   | -4.37621200 |
| H  | -7.19769300 | 0.15960500   | -3.00728600 |
| H  | -8.24446100 | -0.14789300  | -4.40203600 |
| H  | -5.74706600 | -2.77753200  | -3.50856700 |

|    |             |              |              |             |
|----|-------------|--------------|--------------|-------------|
|    | H           | -5.30694200  | -3.14452100  | -5.18585100 |
|    | H           | -7.01163700  | -2.96575800  | -4.73580800 |
|    | H           | -5.19928000  | -0.99866800  | -7.31837800 |
|    | H           | -5.93095700  | 0.59163900   | -7.03890500 |
|    | H           | -6.95826600  | -0.84358000  | -7.18256800 |
| 4c | N           | 0.01848400   | -0.84672300  | -0.19507500 |
|    | C           | -0.01092400  | -2.32019500  | -0.23789100 |
|    | H           | 0.39582100   | -2.71603600  | 0.69401200  |
|    | H           | 0.59305800   | -2.66337300  | -1.07845700 |
|    | H           | -1.03182600  | -2.67082200  | -0.35070600 |
|    | O           | -0.27344500  | -5.08209100  | -1.07395400 |
|    | S           | -1.29641800  | -5.71158500  | -0.20354000 |
|    | O           | -2.20412600  | -6.63025500  | -0.93451600 |
|    | O           | -2.03015700  | -4.72671000  | 0.63498400  |
|    | C           | -0.36241800  | -6.73686900  | 0.93815400  |
|    | H           | 0.30980600   | -6.05869100  | 1.47446500  |
|    | H           | 0.24750700   | -7.40262100  | 0.31855400  |
|    | C           | -1.23801500  | -7.52549400  | 1.90016600  |
|    | H           | -1.89008800  | -6.83035200  | 2.44441700  |
|    | C           | -0.40933500  | -8.34372400  | 2.88911500  |
|    | H           | -1.89066100  | -8.19352800  | 1.32112200  |
|    | H           | 0.23791300   | -9.04099100  | 2.33543800  |
|    | C           | -1.26946300  | -9.12672400  | 3.87954100  |
|    | H           | 0.26884200   | -7.67921200  | 3.44154300  |
|    | H           | -1.80171500  | -8.42054200  | 4.52917400  |
|    | C           | -0.44223100  | -10.09510700 | 4.71981200  |
|    | H           | -2.04410300  | -9.67980200  | 3.33147700  |
|    | H           | 0.06194800   | -10.82404600 | 4.07509100  |
|    | H           | -1.06307100  | -10.64594500 | 5.43130400  |
|    | H           | 0.32888300   | -9.56203600  | 5.28561000  |
|    | C           | 1.21643500   | -0.20986800  | -0.01498100 |
|    | C           | 1.32023800   | 1.16187500   | -0.03183800 |
|    | H           | 2.29998400   | 1.59175500   | 0.12109900  |
|    | C           | 0.16494600   | 1.96578700   | -0.20440300 |
|    | N           | 0.23473900   | 3.30467100   | -0.21758800 |
|    | C           | -1.06593800  | 1.28136600   | -0.35911100 |
|    | H           | -1.99836900  | 1.80920900   | -0.49948000 |
|    | C           | -1.11090500  | -0.09639400  | -0.37115700 |
|    | C           | 1.53155000   | 3.96797400   | -0.15601000 |
|    | C           | -0.98742900  | 4.09621500   | -0.28905300 |
|    | H           | 1.38138000   | 5.04219700   | -0.23579000 |
| H  | 2.17034400  | 3.64384300   | -0.98378600  |             |
| H  | 2.03981900  | 3.75465000   | 0.79046300   |             |
| H  | -1.52916200 | 3.89797900   | -1.21979400  |             |
| H  | -0.72672900 | 5.15156100   | -0.25719700  |             |
| H  | -1.64353500 | 3.87199500   | 0.55814800   |             |
| C  | -1.48168400 | -14.36146500 | 1.70504600   |             |
| C  | -2.59792600 | -13.53158700 | 1.69686800   |             |
| C  | -2.43641700 | -12.14263000 | 1.58457400   |             |

|   |             |              |            |
|---|-------------|--------------|------------|
| C | -0.02857700 | -12.43998100 | 1.49168000 |
| C | -0.20100800 | -13.82647100 | 1.61144000 |
| H | -1.61092500 | -15.43523900 | 1.79050900 |
| C | -3.55716300 | -11.25246100 | 1.61277200 |
| C | -4.46263500 | -10.44836400 | 1.66675600 |
| C | -7.86188700 | -8.91211100  | 1.81142300 |
| C | -7.54170100 | -7.56436200  | 1.91664800 |
| C | -6.19702700 | -7.15990100  | 1.93726400 |
| C | -5.51196800 | -9.47755400  | 1.74272700 |
| C | -6.85716500 | -9.87101400  | 1.72805700 |
| H | -8.90228800 | -9.21925400  | 1.79311900 |
| C | -5.86985200 | -5.77155500  | 2.05634400 |
| C | -5.61845000 | -4.59034000  | 2.15459900 |
| C | -6.27538000 | -0.93833500  | 2.43296300 |
| C | -4.98793400 | -0.43438800  | 2.56491100 |
| C | -3.88521500 | -1.30505400  | 2.54724000 |
| C | -5.38471500 | -3.18385200  | 2.27981400 |
| C | -6.47912400 | -2.30671900  | 2.29580700 |
| H | -7.12455000 | -0.26321900  | 2.43774600 |
| C | 2.36528200  | -1.02232100  | 0.20852900 |
| C | 3.33645300  | -1.72475900  | 0.38121000 |
| C | 6.88658400  | -2.78760800  | 0.74443700 |
| C | 6.74689000  | -4.16799000  | 0.81914200 |
| C | 5.47090600  | -4.75478500  | 0.77862100 |
| C | 4.49044100  | -2.55072500  | 0.55785800 |
| C | 5.76589300  | -1.97201500  | 0.61901700 |
| H | 7.87619700  | -2.34396000  | 0.78019400 |
| C | 5.32596600  | -6.17410200  | 0.88961300 |
| C | 5.21782300  | -7.37618300  | 0.99628400 |
| C | 6.09253600  | -10.98584500 | 1.32610200 |
| C | 4.83212700  | -11.56843600 | 1.37744500 |
| C | 3.68274800  | -10.76482400 | 1.30787100 |
| C | 5.08642400  | -8.79614300  | 1.12483600 |
| C | 6.22742000  | -9.60724400  | 1.20141900 |
| H | 6.97782900  | -11.61094500 | 1.37583700 |
| C | 1.28091900  | -11.86483200 | 1.41797900 |
| C | 2.38068800  | -11.35727400 | 1.36742900 |
| C | -1.15070600 | -11.60551700 | 1.46604200 |
| C | -5.18602900 | -8.11928500  | 1.84145100 |
| C | -4.08206000 | -2.68022500  | 2.38846200 |
| C | 4.34276400  | -3.94064200  | 0.63835000 |
| C | 3.81488100  | -9.37933200  | 1.17739100 |
| H | -3.59569800 | -13.94784600 | 1.78505900 |
| H | 0.67060000  | -14.47193100 | 1.62435000 |
| H | -8.32253400 | -6.81456600  | 1.98716700 |
| H | -7.10281600 | -10.92415000 | 1.64283200 |
| H | -4.81974200 | 0.63097000   | 2.68195800 |
| H | -7.48123300 | -2.70945200  | 2.19299900 |
| H | 7.61915800  | -4.80515100  | 0.91866800 |



|    |             |              |             |
|----|-------------|--------------|-------------|
| H  | 5.86553700  | -0.89363100  | 0.54907300  |
| H  | 4.72335100  | -12.64351700 | 1.47306900  |
| H  | 7.20972000  | -9.15001600  | 1.14925300  |
| H  | -1.02453900 | -10.53404500 | 1.34800000  |
| H  | -4.14574700 | -7.80944300  | 1.83415800  |
| H  | -3.23396700 | -3.35489000  | 2.31889200  |
| H  | 3.35364300  | -4.38409900  | 0.58419900  |
| H  | 2.92969800  | -8.75451200  | 1.11577800  |
| C  | 0.85376600  | 2.65695000   | 3.08147400  |
| C  | -1.49406700 | -0.21543000  | 2.82840300  |
| C  | -2.57070000 | -0.75449800  | 2.68783100  |
| C  | 2.07020900  | 2.01238900   | 3.28407500  |
| C  | 2.12086000  | 0.61170400   | 3.36056600  |
| C  | -0.27411800 | 0.51576300   | 2.99137900  |
| C  | -0.31454800 | 1.91876600   | 2.94036300  |
| H  | 0.81522300  | 3.74101700   | 3.03992000  |
| C  | 0.94617300  | -0.13477100  | 3.20707300  |
| H  | 2.98470100  | 2.58397600   | 3.40357900  |
| H  | -1.26858900 | 2.41335700   | 2.78763500  |
| H  | 0.98262400  | -1.21808100  | 3.26060800  |
| C  | 3.36405600  | -0.04525600  | 3.64712400  |
| C  | 4.41480900  | -0.58481200  | 3.94427400  |
| Si | 5.96515900  | -1.40641900  | 4.53995500  |
| C  | 7.44030800  | -0.62537100  | 3.68036100  |
| C  | 5.80927600  | -3.24410800  | 4.20541200  |
| C  | 6.09583600  | -1.09862000  | 6.38850700  |
| H  | 7.55755100  | 0.41408600   | 4.00061900  |
| H  | 7.33935600  | -0.63889000  | 2.59332800  |
| H  | 8.35462900  | -1.16607400  | 3.94478700  |
| H  | 5.49656400  | -3.43711900  | 3.17644300  |
| H  | 5.06842400  | -3.68688100  | 4.87779900  |
| H  | 6.76618900  | -3.74835400  | 4.37328600  |
| H  | 5.23597200  | -1.51585000  | 6.91967400  |
| H  | 6.15105500  | -0.02898200  | 6.60881700  |
| H  | 7.00082100  | -1.57283100  | 6.78187500  |
| C  | 0.00769600  | -14.36191500 | -1.76235100 |
| C  | 1.20418100  | -13.65947700 | -1.84710200 |
| C  | 1.19066800  | -12.25732500 | -1.90474800 |
| C  | -1.23272700 | -12.28627900 | -1.78781000 |
| C  | -1.20840300 | -13.68719100 | -1.73281800 |
| H  | 0.02253800  | -15.44560000 | -1.71194100 |
| C  | 2.40918200  | -11.51012700 | -1.98377600 |
| C  | 3.41896000  | -10.84293800 | -2.04400700 |
| C  | 6.99947000  | -9.78931300  | -2.10896200 |
| C  | 6.87255300  | -8.41062800  | -2.22689800 |
| C  | 5.59795000  | -7.82571300  | -2.29639500 |
| C  | 4.59283700  | -10.02611400 | -2.11076300 |
| C  | 5.87034700  | -10.59994200 | -2.05222000 |
| H  | 7.98646700  | -10.23642000 | -2.05372200 |

|   |             |              |             |
|---|-------------|--------------|-------------|
| C | 5.45801000  | -6.40606200  | -2.42274800 |
| C | 5.33951600  | -5.20437100  | -2.52599400 |
| C | 6.31714500  | -1.61496600  | -2.73237100 |
| C | 5.08037100  | -0.99945400  | -2.87110800 |
| C | 3.90784500  | -1.77310500  | -2.90510500 |
| C | 5.23890800  | -3.78085600  | -2.64483900 |
| C | 6.40294400  | -2.99841700  | -2.62122700 |
| H | 7.21997500  | -1.01407100  | -2.70708800 |
| C | -2.35351200 | -0.76491400  | -0.57357300 |
| C | -3.40809300 | -1.33901100  | -0.73488800 |
| C | -7.05920000 | -1.94606700  | -1.10522500 |
| C | -7.09897600 | -3.33305500  | -1.18076600 |
| C | -5.91026000 | -4.07948500  | -1.13273500 |
| C | -4.65119100 | -2.02541500  | -0.91308300 |
| C | -5.84112100 | -1.28580800  | -0.98148800 |
| H | -7.98190100 | -1.37610900  | -1.14177800 |
| C | -5.94946200 | -5.50570100  | -1.24402800 |
| C | -5.96225000 | -6.71233700  | -1.35046000 |
| C | -7.16584400 | -10.22646600 | -1.68128700 |
| C | -5.96287100 | -10.91965500 | -1.72664500 |
| C | -4.74527400 | -10.22410800 | -1.64995800 |
| C | -5.96251000 | -8.13850000  | -1.47648600 |
| C | -7.17314800 | -8.84077600  | -1.55965200 |
| H | -8.10410800 | -10.76838800 | -1.73841600 |
| C | -2.47272300 | -11.57203800 | -1.74359000 |
| C | -3.50883600 | -10.94510800 | -1.69946000 |
| C | -0.02973000 | -11.57614000 | -1.87116200 |
| C | 4.46181100  | -8.63753900  | -2.23348300 |
| C | 3.98891800  | -3.16328000  | -2.78430500 |
| C | -4.68143700 | -3.42489000  | -0.98106800 |
| C | -4.74531500 | -8.83146000  | -1.51708600 |
| H | 2.15298900  | -14.18482500 | -1.86823800 |
| H | -2.14217000 | -14.23380300 | -1.65581700 |
| H | 7.75171800  | -7.77662700  | -2.26853400 |
| H | 5.96665000  | -11.67566600 | -1.95098200 |
| H | 5.00545900  | 0.07907700   | -2.95991700 |
| H | 7.36592600  | -3.48438600  | -2.50672500 |
| H | -8.04641600 | -3.85102500  | -1.28631300 |
| H | -5.79971000 | -0.20307700  | -0.91693100 |
| H | -5.95120500 | -12.00022800 | -1.82267700 |
| H | -8.10923900 | -8.29390500  | -1.51837300 |
| H | -0.04477900 | -10.49182200 | -1.90307700 |
| H | 3.47430600  | -8.19035600  | -2.27553400 |
| H | 3.08558200  | -3.76428100  | -2.79611500 |
| H | -3.76378400 | -3.99973800  | -0.88159100 |
| H | -3.81131200 | -8.28119700  | -1.43252500 |
| C | -0.37097900 | 2.66242300   | -3.48941600 |
| C | 1.63875600  | -0.45328200  | -3.20651200 |
| C | 2.65031400  | -1.10591900  | -3.06296400 |

|    |    |             |              |             |
|----|----|-------------|--------------|-------------|
|    | C  | -1.65081000 | 2.15683600   | -3.69362000 |
|    | C  | -1.85916000 | 0.76997600   | -3.75462800 |
|    | C  | 0.50769600  | 0.40909400   | -3.37281500 |
|    | C  | 0.70629900  | 1.79888100   | -3.33518100 |
|    | H  | -0.21058300 | 3.73564400   | -3.45811600 |
|    | C  | -0.77763200 | -0.10276600  | -3.58531200 |
|    | H  | -2.49372000 | 2.82703500   | -3.82603100 |
|    | H  | 1.70938000  | 2.18587200   | -3.18593600 |
|    | H  | -0.93581200 | -1.17569200  | -3.62535500 |
|    | C  | -3.16831000 | 0.26050200   | -4.04596000 |
|    | C  | -4.27541000 | -0.14485300  | -4.35118300 |
|    | Si | -5.91065800 | -0.76972600  | -4.95707500 |
|    | C  | -7.28015200 | 0.20623900   | -4.12363000 |
|    | C  | -6.00088300 | -2.60396100  | -4.58675900 |
|    | C  | -5.97797000 | -0.47134900  | -6.81087200 |
|    | H  | -7.22066300 | 1.26231000   | -4.40218300 |
|    | H  | -7.22709600 | 0.13450700   | -3.03536700 |
|    | H  | -8.25549000 | -0.17395700  | -4.44366100 |
|    | H  | -5.75086100 | -2.80692800  | -3.54242200 |
|    | H  | -5.29939100 | -3.15468500  | -5.22019500 |
|    | H  | -7.00769400 | -2.98786200  | -4.77897000 |
|    | H  | -5.16566500 | -0.99182900  | -7.32531800 |
|    | H  | -5.90370800 | 0.59494600   | -7.04179700 |
|    | H  | -6.92670800 | -0.84034000  | -7.21356900 |
| 3d | N  | -0.00653100 | -0.83897500  | -0.17885600 |
|    | C  | -0.22677700 | -3.69529100  | -0.65172100 |
|    | H  | 0.15453000  | -3.57723100  | 0.36520500  |
|    | H  | 0.51652600  | -3.34584100  | -1.36644000 |
|    | H  | -1.15855900 | -3.14336600  | -0.76808400 |
|    | O  | -0.43168700 | -5.10050000  | -0.96902900 |
|    | S  | -1.44583600 | -5.92239400  | -0.04235200 |
|    | O  | -2.08636600 | -6.89816600  | -0.91126400 |
|    | O  | -2.28044000 | -4.99121500  | 0.70639500  |
|    | C  | -0.34147200 | -6.76772800  | 1.07330300  |
|    | H  | 0.24871300  | -5.99456700  | 1.57441100  |
|    | H  | 0.31519900  | -7.36879800  | 0.43796200  |
|    | C  | -1.13153600 | -7.62402600  | 2.05862400  |
|    | H  | -1.76650000 | -6.97743300  | 2.67510100  |
|    | C  | -0.20677900 | -8.45942400  | 2.94350600  |
|    | H  | -1.79530800 | -8.29502200  | 1.49565000  |
|    | H  | 0.42665400  | -9.09083900  | 2.30362800  |
|    | C  | -0.98815500 | -9.35311200  | 3.90665000  |
|    | H  | 0.47426500  | -7.80312500  | 3.49975300  |
|    | H  | -1.46382100 | -8.73972000  | 4.68237600  |
|    | C  | -0.11749500 | -10.43531800 | 4.54449400  |
|    | H  | -1.80834500 | -9.83428600  | 3.35641400  |
|    | H  | 0.52692700  | -10.87472100 | 3.77037400  |
|    | C  | -0.92889200 | -11.55591700 | 5.19123300  |
|    | H  | 0.55753500  | -9.98578300  | 5.28548000  |

|   |             |              |             |
|---|-------------|--------------|-------------|
| H | -1.61704900 | -11.96767300 | 4.43976400  |
| H | -1.55417300 | -11.14477500 | 5.99478400  |
| C | -0.04416900 | -12.67545300 | 5.73293300  |
| H | 0.54741200  | -13.11904800 | 4.92371800  |
| H | -0.63658100 | -13.47246200 | 6.19167700  |
| H | 0.65340200  | -12.29624700 | 6.48694700  |
| C | 1.16823100  | -0.21433200  | -0.00841400 |
| C | 1.34243000  | 1.16593800   | -0.03294400 |
| H | 2.33421900  | 1.57293800   | 0.11404100  |
| C | 0.21886500  | 1.99659600   | -0.22314800 |
| N | 0.32685300  | 3.35132800   | -0.24832300 |
| C | -1.02257000 | 1.34841000   | -0.39061000 |
| H | -1.93840200 | 1.90033100   | -0.55576800 |
| C | -1.06835300 | -0.04155700  | -0.37419900 |
| C | 1.63651800  | 3.97178400   | -0.17623900 |
| C | -0.87056700 | 4.16690900   | -0.33056700 |
| H | 1.52367300  | 5.05121500   | -0.26409800 |
| H | 2.28154300  | 3.62564200   | -0.99261900 |
| H | 2.13616700  | 3.75174400   | 0.77544400  |
| H | -1.41860000 | 3.98252500   | -1.26249700 |
| H | -0.58823800 | 5.21793700   | -0.30034300 |
| H | -1.54418700 | 3.96504100   | 0.51095700  |
| C | -1.54240600 | -14.32137000 | 1.91416300  |
| C | -2.63577500 | -13.46334800 | 1.84937300  |
| C | -2.43901200 | -12.09293300 | 1.62066200  |
| C | -0.04086500 | -12.46558200 | 1.52694100  |
| C | -0.24874000 | -13.83238000 | 1.76406000  |
| H | -1.70023200 | -15.37990900 | 2.09176400  |
| C | -3.53692800 | -11.17368600 | 1.62220600  |
| C | -4.42932500 | -10.35356100 | 1.65557000  |
| C | -7.84485800 | -8.85618200  | 1.74865200  |
| C | -7.54508500 | -7.50487200  | 1.86592100  |
| C | -6.20697800 | -7.08137300  | 1.91276100  |
| C | -5.48680600 | -9.38955700  | 1.71753200  |
| C | -6.82620000 | -9.80074600  | 1.67643200  |
| H | -8.88044500 | -9.17734200  | 1.71089100  |
| C | -5.90502400 | -5.68772500  | 2.04104400  |
| C | -5.68311600 | -4.50113500  | 2.14802600  |
| C | -6.44461300 | -0.87239000  | 2.46464600  |
| C | -5.17201600 | -0.32957000  | 2.58851100  |
| C | -4.04263300 | -1.16480800  | 2.56221700  |
| C | -5.48827200 | -3.08920400  | 2.28887200  |
| C | -6.60838000 | -2.24481300  | 2.31796400  |
| H | -7.31376900 | -0.22327800  | 2.48006600  |
| C | 2.31030800  | -1.06270500  | 0.21696500  |
| C | 3.27825000  | -1.77019300  | 0.39070900  |
| C | 6.83016600  | -2.82697400  | 0.79708500  |
| C | 6.70091100  | -4.20842400  | 0.86780500  |
| C | 5.42938300  | -4.80116900  | 0.79867800  |

|    |             |              |            |
|----|-------------|--------------|------------|
| C  | 4.43111500  | -2.60141600  | 0.56725100 |
| C  | 5.70543200  | -2.02093600  | 0.64944500 |
| H  | 7.81498200  | -2.37421900  | 0.85385000 |
| C  | 5.29462800  | -6.22364700  | 0.89326100 |
| C  | 5.19301300  | -7.42774000  | 0.98684500 |
| C  | 6.09505700  | -11.03508300 | 1.29152900 |
| C  | 4.83898000  | -11.62765500 | 1.34272900 |
| C  | 3.68415700  | -10.83126900 | 1.27949500 |
| C  | 5.07323800  | -8.85012600  | 1.10391700 |
| C  | 6.21992200  | -9.65481900  | 1.17391000 |
| H  | 6.98526200  | -11.65388200 | 1.33757200 |
| C  | 1.28081000  | -11.92616900 | 1.41309000 |
| C  | 2.38389200  | -11.42707000 | 1.34732400 |
| C  | -1.14023200 | -11.60575800 | 1.44109700 |
| C  | -5.18187500 | -8.02747200  | 1.83162900 |
| C  | -4.20267800 | -2.54530200  | 2.40197400 |
| C  | 4.29767800  | -3.99338300  | 0.64269200 |
| C  | 3.80677000  | -9.44407700  | 1.15536400 |
| H  | -3.64269200 | -13.84261000 | 1.98675100 |
| H  | 0.60524900  | -14.49870900 | 1.82535900 |
| H  | -8.33729800 | -6.76623000  | 1.92583900 |
| H  | -7.05579100 | -10.85647500 | 1.57978400 |
| H  | -5.03642300 | 0.74016800   | 2.70814800 |
| H  | -7.59856800 | -2.67618200  | 2.21684300 |
| H  | 7.57516900  | -4.84013500  | 0.98347100 |
| H  | 5.80043500  | -0.94189500  | 0.58062700 |
| H  | 4.73841100  | -12.70383600 | 1.43504600 |
| H  | 7.19925400  | -9.19081600  | 1.12394600 |
| H  | -0.98336100 | -10.55131100 | 1.23599100 |
| H  | -4.14651600 | -7.70418200  | 1.85462900 |
| H  | -3.33490900 | -3.19445700  | 2.34570000 |
| H  | 3.31359400  | -4.44603000  | 0.57487400 |
| H  | 2.91685900  | -8.82526800  | 1.09949000 |
| C  | 0.72029300  | 2.81285400   | 3.05082300 |
| C  | -1.66887900 | -0.03164000  | 2.82808200 |
| C  | -2.74158900 | -0.58044300  | 2.69632800 |
| C  | 1.92332300  | 2.15259400   | 3.27834600 |
| C  | 1.95136600  | 0.75241200   | 3.37138800 |
| C  | -0.44075000 | 0.68907200   | 2.98031600 |
| C  | -0.45786000 | 2.09104700   | 2.90891000 |
| H  | 0.70056700  | 3.89626400   | 2.98577800 |
| C  | 0.76736300  | 0.02294000   | 3.21304900 |
| H  | 2.84568000  | 2.71136000   | 3.39940600 |
| H  | -1.40137100 | 2.59837600   | 2.73504700 |
| H  | 0.78715800  | -1.06026000  | 3.27058000 |
| C  | 3.18278800  | 0.07777500   | 3.66949900 |
| C  | 4.22344800  | -0.48016500  | 3.96959700 |
| Si | 5.76959100  | -1.31706800  | 4.55143400 |
| C  | 7.24725900  | -0.54795800  | 3.68362200 |

|   |             |              |             |
|---|-------------|--------------|-------------|
| C | 5.60800300  | -3.15421300  | 4.21268800  |
| C | 5.91737200  | -1.01668300  | 6.40110900  |
| H | 7.37034700  | 0.49428900   | 3.99293700  |
| H | 7.14375600  | -0.57326800  | 2.59654700  |
| H | 8.15958900  | -1.09047600  | 3.95183300  |
| H | 5.33499500  | -3.34754000  | 3.17176300  |
| H | 4.83980600  | -3.59188000  | 4.85797200  |
| H | 6.55511900  | -3.66362600  | 4.41819000  |
| H | 5.05869400  | -1.42966700  | 6.93833300  |
| H | 5.98102600  | 0.05216900   | 6.62377300  |
| H | 6.82260800  | -1.49721000  | 6.78657800  |
| C | -0.04255000 | -14.38926600 | -1.60471400 |
| C | 1.14518600  | -13.67907100 | -1.73496500 |
| C | 1.11532900  | -12.28265700 | -1.87390500 |
| C | -1.30747200 | -12.33409500 | -1.74830800 |
| C | -1.26694200 | -13.72854300 | -1.61065000 |
| H | -0.01440800 | -15.46763700 | -1.48908300 |
| C | 2.32778200  | -11.52888700 | -1.98242900 |
| C | 3.33689600  | -10.86214900 | -2.05862000 |
| C | 6.92734200  | -9.84811900  | -2.14824300 |
| C | 6.81594400  | -8.46745200  | -2.25823000 |
| C | 5.54814200  | -7.86635800  | -2.31604700 |
| C | 4.51786500  | -10.05591600 | -2.13531100 |
| C | 5.78899100  | -10.64534500 | -2.08726900 |
| H | 7.90943500  | -10.30724300 | -2.10140300 |
| C | 5.42865700  | -6.44369300  | -2.43171200 |
| C | 5.33741900  | -5.23850900  | -2.52327300 |
| C | 6.37755400  | -1.66464500  | -2.68926600 |
| C | 5.15273900  | -1.02789200  | -2.83970800 |
| C | 3.96738900  | -1.78023800  | -2.89556300 |
| C | 5.26411400  | -3.81223900  | -2.63368200 |
| C | 6.44060700  | -3.04995600  | -2.58684000 |
| H | 7.28937200  | -1.07814600  | -2.64709200 |
| C | -2.32839000 | -0.70845600  | -0.58156500 |
| C | -3.38789100 | -1.27546500  | -0.73763300 |
| C | -7.04856400 | -1.93051900  | -1.05108000 |
| C | -7.06849300 | -3.31653100  | -1.15407100 |
| C | -5.86470800 | -4.04006200  | -1.13999400 |
| C | -4.63463700 | -1.96203100  | -0.90005200 |
| C | -5.84122400 | -1.24834300  | -0.92805400 |
| H | -7.98154800 | -1.37577100  | -1.06163700 |
| C | -5.87431000 | -5.46670400  | -1.26481300 |
| C | -5.88638400 | -6.67345000  | -1.37845000 |
| C | -7.21768600 | -10.13812000 | -1.73374900 |
| C | -6.04439700 | -10.88245500 | -1.76454200 |
| C | -4.80131600 | -10.23706100 | -1.67348400 |
| C | -5.93298800 | -8.09946400  | -1.51068700 |
| C | -7.16986400 | -8.75373800  | -1.60976500 |
| H | -8.17712000 | -10.63994900 | -1.80442100 |

|    |             |              |             |
|----|-------------|--------------|-------------|
| C  | -2.55250300 | -11.62697900 | -1.73122100 |
| C  | -3.58581200 | -10.99423900 | -1.70706500 |
| C  | -0.11294300 | -11.61575800 | -1.87715300 |
| C  | 4.40271100  | -8.66521000  | -2.25090000 |
| C  | 4.02715600  | -3.17276800  | -2.78733600 |
| C  | -4.65095900 | -3.35851100  | -1.00434000 |
| C  | -4.74817500 | -8.84510900  | -1.54112600 |
| H  | 2.10045900  | -14.19287700 | -1.72362600 |
| H  | -2.19398700 | -14.27994600 | -1.49648500 |
| H  | 7.70239700  | -7.84374700  | -2.30154600 |
| H  | 5.87296500  | -11.72254000 | -1.99042400 |
| H  | 5.09754600  | 0.05257900   | -2.91968500 |
| H  | 7.39390900  | -3.55196900  | -2.46134600 |
| H  | -8.00865300 | -3.84876100  | -1.25244200 |
| H  | -5.82192100 | -0.16705100  | -0.83441300 |
| H  | -6.07764100 | -11.96239700 | -1.86192100 |
| H  | -8.08374300 | -8.16994700  | -1.57937400 |
| H  | -0.14154200 | -10.53514600 | -1.96915700 |
| H  | 3.42024500  | -8.20600200  | -2.28422400 |
| H  | 3.11575700  | -3.76043900  | -2.82001900 |
| H  | -3.72085800 | -3.91506800  | -0.95673200 |
| H  | -3.79134400 | -8.34074000  | -1.45021100 |
| C  | -0.25609400 | 2.70350300   | -3.52472600 |
| C  | 1.71455600  | -0.43391600  | -3.20579600 |
| C  | 2.72090100  | -1.09369900  | -3.05923900 |
| C  | -1.53975300 | 2.21235100   | -3.73767100 |
| C  | -1.76545800 | 0.82773800   | -3.78316100 |
| C  | 0.59341300  | 0.44043700   | -3.37910700 |
| C  | 0.80799400  | 1.82775800   | -3.35232500 |
| H  | -0.08304700 | 3.77479700   | -3.49711700 |
| C  | -0.69674300 | -0.05641200  | -3.59423000 |
| H  | -2.37307300 | 2.89176400   | -3.88409800 |
| H  | 1.81342500  | 2.20374700   | -3.19148500 |
| H  | -0.86972600 | -1.12740300  | -3.61638000 |
| C  | -3.08078900 | 0.33075900   | -4.07119600 |
| C  | -4.19380400 | -0.06814000  | -4.36461400 |
| Si | -5.84917600 | -0.66911700  | -4.93553500 |
| C  | -7.18877200 | 0.32560800   | -4.07526800 |
| C  | -5.96870500 | -2.49930700  | -4.55236700 |
| C  | -5.95152600 | -0.37951200  | -6.78965100 |
| H  | -7.10981400 | 1.38501300   | -4.33574400 |
| H  | -7.12541600 | 0.23212900   | -2.98875900 |
| H  | -8.17532800 | -0.02847900  | -4.39129100 |
| H  | -5.73093800 | -2.69539000  | -3.50347800 |
| H  | -5.27201900 | -3.06812500  | -5.17532100 |
| H  | -6.98051600 | -2.86818700  | -4.74858700 |
| H  | -5.15627200 | -0.91322800  | -7.31749500 |
| H  | -5.86769600 | 0.68458200   | -7.02769200 |
| H  | -6.91283500 | -0.73779500  | -7.17183700 |

|      |             |              |              |             |
|------|-------------|--------------|--------------|-------------|
| TS-d | N           | -0.00917600  | -0.86429700  | -0.22411200 |
|      | C           | -0.08164100  | -2.89338800  | -0.41842900 |
|      | H           | 0.23826600   | -2.97975400  | 0.61017300  |
|      | H           | 0.65976800   | -2.80910600  | -1.19843400 |
|      | H           | -1.12986900  | -2.79255900  | -0.64039700 |
|      | O           | -0.12264200  | -4.74088400  | -0.68646700 |
|      | S           | -1.19438100  | -5.52975700  | 0.06963600  |
|      | O           | -1.94074600  | -6.41066300  | -0.84050700 |
|      | O           | -2.02209600  | -4.63486300  | 0.89760200  |
|      | C           | -0.23809600  | -6.56401000  | 1.17223500  |
|      | H           | 0.38119800   | -5.88199300  | 1.76274300  |
|      | H           | 0.41657800   | -7.16202700  | 0.53092700  |
|      | C           | -1.11481500  | -7.43985600  | 2.05631500  |
|      | H           | -1.77295800  | -6.80153700  | 2.65818700  |
|      | C           | -0.27779700  | -8.33885800  | 2.96511700  |
|      | H           | -1.75791300  | -8.06197500  | 1.41926100  |
|      | H           | 0.36205100   | -8.98230900  | 2.34317500  |
|      | C           | -1.14174800  | -9.21400100  | 3.87174400  |
|      | H           | 0.40269000   | -7.72677400  | 3.57114800  |
|      | H           | -1.64106100  | -8.58748600  | 4.62270100  |
|      | C           | -0.35297500  | -10.32650700 | 4.55924200  |
|      | H           | -1.94553300  | -9.66511300  | 3.27382900  |
|      | H           | 0.25984100   | -10.84595600 | 3.80893600  |
|      | C           | -1.25068000  | -11.34836100 | 5.25221300  |
|      | H           | 0.35088800   | -9.89536000  | 5.28424400  |
|      | H           | -1.97952500  | -11.72561200 | 4.52199200  |
|      | H           | -1.82959900  | -10.85159300 | 6.04105700  |
|      | C           | -0.46478800  | -12.51863100 | 5.83636700  |
|      | H           | 0.07600200   | -13.04863300 | 5.04481800  |
|      | H           | -1.12117500  | -13.23757400 | 6.33405000  |
|      | H           | 0.27144600   | -12.17142500 | 6.56857600  |
|      | C           | 1.17023000   | -0.24512900  | -0.03252700 |
|      | C           | 1.32005800   | 1.13334800   | -0.04231400 |
|      | H           | 2.30611100   | 1.54775200   | 0.11845800  |
|      | C           | 0.18686600   | 1.95511100   | -0.23467300 |
|      | N           | 0.28222200   | 3.30438400   | -0.25405800 |
|      | C           | -1.05121600  | 1.29658500   | -0.40521700 |
|      | H           | -1.97339000  | 1.84035200   | -0.55836800 |
|      | C           | -1.09473700  | -0.08952300  | -0.40729600 |
|      | C           | 1.58800500   | 3.93840900   | -0.18647100 |
| C    | -0.92328700 | 4.11174400   | -0.33819200  |             |
| H    | 1.46333600  | 5.01604000   | -0.27464700  |             |
| H    | 2.23079900  | 3.59688900   | -1.00571900  |             |
| H    | 2.09021200  | 3.72288500   | 0.76409300   |             |
| H    | -1.46368800 | 3.92504100   | -1.27342300  |             |
| H    | -0.64880100 | 5.16421800   | -0.30274300  |             |
| H    | -1.59613600 | 3.89982800   | 0.50061300   |             |
| C    | -1.47558000 | -14.34596500 | 1.80006500   |             |
| C    | -2.57637900 | -13.49571100 | 1.80652500   |             |



|   |             |              |            |
|---|-------------|--------------|------------|
| C | -2.39567100 | -12.11371800 | 1.64344200 |
| C | 0.00176900  | -12.45971500 | 1.47260500 |
| C | -0.18975500 | -13.83845700 | 1.64251900 |
| H | -1.62075900 | -15.41369100 | 1.92556100 |
| C | -3.50147200 | -11.20552400 | 1.69974400 |
| C | -4.39745600 | -10.39272300 | 1.78090800 |
| C | -7.80659200 | -8.90036800  | 2.04120600 |
| C | -7.50496400 | -7.54604800  | 2.10890800 |
| C | -6.16773900 | -7.11878300  | 2.06939300 |
| C | -5.45137800 | -9.42895400  | 1.88817300 |
| C | -6.78986000 | -9.84341100  | 1.93289000 |
| H | -8.84146800 | -9.22479400  | 2.06970700 |
| C | -5.86990200 | -5.72006800  | 2.14275900 |
| C | -5.66112900 | -4.52795600  | 2.20449500 |
| C | -6.45100600 | -0.89444300  | 2.37357100 |
| C | -5.18388700 | -0.33980400  | 2.50142900 |
| C | -4.05099200 | -1.16987800  | 2.52047900 |
| C | -5.47969900 | -3.11017000  | 2.29255100 |
| C | -6.60482900 | -2.27238300  | 2.27376800 |
| H | -7.32402200 | -0.25074900  | 2.35285200 |
| C | 2.31359400  | -1.08269000  | 0.19865400 |
| C | 3.28567300  | -1.78244100  | 0.37762700 |
| C | 6.83698400  | -2.81365800  | 0.83632500 |
| C | 6.71760400  | -4.19752400  | 0.86460000 |
| C | 5.45364300  | -4.79989700  | 0.75189600 |
| C | 4.44347900  | -2.60418900  | 0.56203000 |
| C | 5.70863900  | -2.01247300  | 0.68939200 |
| H | 7.81664000  | -2.35547000  | 0.92588200 |
| C | 5.33030900  | -6.22478000  | 0.80935900 |
| C | 5.23896900  | -7.43135500  | 0.87300200 |
| C | 6.12950600  | -11.05149600 | 1.02049500 |
| C | 4.87299600  | -11.63659800 | 1.12095000 |
| C | 3.72335900  | -10.83097900 | 1.14248300 |
| C | 5.11872000  | -8.85576300  | 0.95540000 |
| C | 6.26048800  | -9.66907100  | 0.93877900 |
| H | 7.01516900  | -11.67773300 | 1.00083100 |
| C | 1.31721700  | -11.90892700 | 1.34260100 |
| C | 2.42230700  | -11.41868300 | 1.25094200 |
| C | -1.10568900 | -11.60532200 | 1.46067300 |
| C | -5.14415000 | -8.06376100  | 1.95468600 |
| C | -4.19846000 | -2.55574300  | 2.40229000 |
| C | 4.31814300  | -3.99831600  | 0.59309300 |
| C | 3.85152300  | -9.44187800  | 1.05485200 |
| H | -3.57703300 | -13.89040900 | 1.94598200 |
| H | 0.67054700  | -14.49909100 | 1.64552800 |
| H | -8.29487400 | -6.80759700  | 2.19548600 |
| H | -7.02096000 | -10.90161200 | 1.87335600 |
| H | -5.05629800 | 0.73398100   | 2.58880900 |
| H | -7.59122300 | -2.71270300  | 2.17381200 |

|    |             |              |             |
|----|-------------|--------------|-------------|
| H  | 7.59507400  | -4.82457800  | 0.98119100  |
| H  | 5.79435800  | -0.93106800  | 0.65582200  |
| H  | 4.76833900  | -12.71441300 | 1.18447500  |
| H  | 7.23965300  | -9.21080500  | 0.85086500  |
| H  | -0.96251300 | -10.53995000 | 1.30894100  |
| H  | -4.11011200 | -7.73676900  | 1.90758100  |
| H  | -3.32516800 | -3.19985500  | 2.37110900  |
| H  | 3.33932000  | -4.45524900  | 0.48582400  |
| H  | 2.96556100  | -8.81557900  | 1.06170000  |
| C  | 0.77017800  | 2.75412200   | 3.03140600  |
| C  | -1.67699500 | -0.04103200  | 2.79705600  |
| C  | -2.75318900 | -0.58184100  | 2.66242700  |
| C  | 1.95704300  | 2.06711200   | 3.26563700  |
| C  | 1.95256200  | 0.66674700   | 3.36091800  |
| C  | -0.43759000 | 0.65752900   | 2.95375400  |
| C  | -0.42354400 | 2.05949500   | 2.88308100  |
| H  | 0.77474600  | 3.83786800   | 2.96962700  |
| C  | 0.75368400  | -0.03567100  | 3.19454900  |
| H  | 2.89050700  | 2.60524600   | 3.39349400  |
| H  | -1.35489700 | 2.58823500   | 2.70710300  |
| H  | 0.74723100  | -1.11889000  | 3.25741500  |
| C  | 3.16251100  | -0.03599000  | 3.67897900  |
| C  | 4.18376000  | -0.61628800  | 4.00145800  |
| Si | 5.69140200  | -1.48677000  | 4.63248700  |
| C  | 7.21236500  | -0.70261000  | 3.86086500  |
| C  | 5.53016900  | -3.30999600  | 4.22895800  |
| C  | 5.74558900  | -1.24219200  | 6.49470100  |
| H  | 7.32732700  | 0.32699600   | 4.21209400  |
| H  | 7.15667700  | -0.68812100  | 2.77055600  |
| H  | 8.10847100  | -1.26109100  | 4.14937500  |
| H  | 5.31481000  | -3.46809000  | 3.16941400  |
| H  | 4.72101500  | -3.75668300  | 4.81441100  |
| H  | 6.45746100  | -3.83840300  | 4.47210300  |
| H  | 4.85741900  | -1.66305300  | 6.97387600  |
| H  | 5.80425500  | -0.18083100  | 6.75142800  |
| H  | 6.62582300  | -1.74137400  | 6.91234500  |
| C  | -0.00182400 | -14.35678900 | -1.75033900 |
| C  | 1.17507900  | -13.63054800 | -1.88989400 |
| C  | 1.12998300  | -12.22972700 | -1.96866000 |
| C  | -1.28615800 | -12.30887000 | -1.76519300 |
| C  | -1.23069000 | -13.70741100 | -1.68772500 |
| H  | 0.03856400  | -15.43891500 | -1.68331700 |
| C  | 2.33282700  | -11.46344800 | -2.09413300 |
| C  | 3.33914700  | -10.79487100 | -2.18826600 |
| C  | 6.93126600  | -9.81794200  | -2.43444500 |
| C  | 6.83347200  | -8.43263400  | -2.48510900 |
| C  | 5.57335300  | -7.81467000  | -2.44849800 |
| C  | 4.52307600  | -9.99615700  | -2.29294800 |
| C  | 5.78663900  | -10.60233300 | -2.34047700 |

|   |             |              |             |
|---|-------------|--------------|-------------|
| H | 7.90739200  | -10.29057200 | -2.46444900 |
| C | 5.46856400  | -6.38777200  | -2.51327400 |
| C | 5.38927000  | -5.17987200  | -2.57193000 |
| C | 6.43892900  | -1.60405100  | -2.62373000 |
| C | 5.21823500  | -0.96148300  | -2.78383100 |
| C | 4.03426000  | -1.71147900  | -2.87945400 |
| C | 5.32259000  | -3.75106200  | -2.64258900 |
| C | 6.49848800  | -2.99169300  | -2.55393000 |
| H | 7.35069800  | -1.02072800  | -2.54934500 |
| C | -2.34912200 | -0.75852600  | -0.61134500 |
| C | -3.40641200 | -1.33182000  | -0.75548300 |
| C | -7.05882700 | -1.96899800  | -1.13313800 |
| C | -7.08875600 | -3.35754200  | -1.17711300 |
| C | -5.89477600 | -4.09235200  | -1.09109500 |
| C | -4.65206400 | -2.02086500  | -0.91000300 |
| C | -5.84789400 | -1.29527300  | -1.00550500 |
| H | -7.98495000 | -1.40693100  | -1.19772600 |
| C | -5.92119300 | -5.52175000  | -1.16271800 |
| C | -5.95001600 | -6.73052700  | -1.23970700 |
| C | -7.22293600 | -10.23012600 | -1.44558000 |
| C | -6.03504100 | -10.94596200 | -1.52826000 |
| C | -4.80473300 | -10.27012000 | -1.51762400 |
| C | -5.97962300 | -8.15861500  | -1.33375100 |
| C | -7.20339700 | -8.84238700  | -1.35247200 |
| H | -8.17144100 | -10.75693200 | -1.45102000 |
| C | -2.53644300 | -11.61649700 | -1.68481900 |
| C | -3.57746200 | -11.00135300 | -1.60796100 |
| C | -0.10266800 | -11.57437200 | -1.90277900 |
| C | 4.42148800  | -8.60095100  | -2.34769500 |
| C | 4.08957300  | -3.10605800  | -2.80248200 |
| C | -4.67601600 | -3.42107000  | -0.94367000 |
| C | -4.77956200 | -8.87593600  | -1.41069300 |
| H | 2.13404900  | -14.13552500 | -1.93583100 |
| H | -2.14945900 | -14.27138300 | -1.56785000 |
| H | 7.72470000  | -7.81842000  | -2.55702100 |
| H | 5.85986200  | -11.68353500 | -2.29205800 |
| H | 5.16614600  | 0.12054800   | -2.84053900 |
| H | 7.44887500  | -3.49775100  | -2.42244400 |
| H | -8.03060100 | -3.88493200  | -1.28493200 |
| H | -5.81671900 | -0.21115800  | -0.96437000 |
| H | -6.04597400 | -12.02809900 | -1.60288600 |
| H | -8.12854400 | -8.28004000  | -1.28404700 |
| H | -0.14285700 | -10.49135800 | -1.95085600 |
| H | 3.44596600  | -8.12818000  | -2.30479400 |
| H | 3.17718400  | -3.69016400  | -2.86379200 |
| H | -3.75369500 | -3.98419100  | -0.83309900 |
| H | -3.83295200 | -8.34486700  | -1.37617700 |
| C | -0.27979200 | 2.70274700   | -3.52872700 |
| C | 1.77409700  | -0.38174900  | -3.20863000 |

|    |    |             |              |             |
|----|----|-------------|--------------|-------------|
|    | C  | 2.78863900  | -1.02699300  | -3.05451000 |
|    | C  | -1.54748800 | 2.17585100   | -3.75284200 |
|    | C  | -1.73222700 | 0.78565300   | -3.80996400 |
|    | C  | 0.63366400  | 0.46496300   | -3.38974800 |
|    | C  | 0.80855300  | 1.85751500   | -3.35421100 |
|    | H  | -0.13789200 | 3.77843400   | -3.49558000 |
|    | C  | -0.63952000 | -0.06800800  | -3.61925400 |
|    | H  | -2.39912100 | 2.83167900   | -3.90096000 |
|    | H  | 1.80224000  | 2.26125900   | -3.18774400 |
|    | H  | -0.78007500 | -1.14349100  | -3.65442700 |
|    | C  | -3.02873100 | 0.25028600   | -4.11245000 |
|    | C  | -4.12591100 | -0.18134100  | -4.41811800 |
|    | Si | -5.75267100 | -0.83261900  | -5.01560900 |
|    | C  | -7.13177700 | 0.16927600   | -4.23113600 |
|    | C  | -5.85441300 | -2.65075300  | -4.57516200 |
|    | C  | -5.80108900 | -0.60837200  | -6.88058800 |
|    | H  | -7.05862200 | 1.22048500   | -4.52419600 |
|    | H  | -7.10261400 | 0.11313800   | -3.14080100 |
|    | H  | -8.10272900 | -0.20931400  | -4.56603500 |
|    | H  | -5.64388500 | -2.81106800  | -3.51466900 |
|    | H  | -5.13133400 | -3.22669300  | -5.16005100 |
|    | H  | -6.85429000 | -3.04175100  | -4.78844800 |
|    | H  | -4.98482500 | -1.15078200  | -7.36545900 |
|    | H  | -5.72122300 | 0.44752100   | -7.15362500 |
|    | H  | -6.74649500 | -0.99106200  | -7.27823500 |
| 4d | N  | 0.01566600  | -0.84746800  | -0.19264200 |
|    | C  | -0.02239100 | -2.32014000  | -0.24461300 |
|    | H  | 0.44117100  | -2.72048800  | 0.65942200  |
|    | H  | 0.53075000  | -2.66159100  | -1.12177400 |
|    | H  | -1.05044700 | -2.66863900  | -0.29721600 |
|    | O  | -0.34189200 | -5.07064300  | -1.15655500 |
|    | S  | -1.33080300 | -5.69632600  | -0.24545300 |
|    | O  | -2.24152800 | -6.64572500  | -0.92949100 |
|    | O  | -2.05728400 | -4.70549000  | 0.59205600  |
|    | C  | -0.35510700 | -6.68151800  | 0.89525900  |
|    | H  | 0.31166400  | -5.98382600  | 1.41229900  |
|    | H  | 0.25726200  | -7.34534100  | 0.27628700  |
|    | C  | -1.20693100 | -7.47489000  | 1.87341600  |
|    | H  | -1.84765300 | -6.78572900  | 2.43776300  |
|    | C  | -0.35903600 | -8.31254700  | 2.82873600  |
|    | H  | -1.87201000 | -8.13550800  | 1.30049000  |
|    | H  | 0.28839700  | -8.98046300  | 2.24042500  |
|    | C  | -1.20545100 | -9.15293200  | 3.78357400  |
|    | H  | 0.31673500  | -7.66145400  | 3.39879800  |
|    | H  | -1.70955100 | -8.49836900  | 4.50719300  |
|    | C  | -0.39561700 | -10.22096800 | 4.51630800  |
|    | H  | -2.00644900 | -9.64355300  | 3.21281200  |
|    | H  | 0.23154600  | -10.75368000 | 3.78737300  |
|    | C  | -1.27023000 | -11.23842000 | 5.24383300  |

|   |             |              |             |
|---|-------------|--------------|-------------|
| H | 0.29596900  | -9.74722100  | 5.22655400  |
| H | -1.98472200 | -11.66149900 | 4.52421600  |
| H | -1.86640000 | -10.72785300 | 6.01093300  |
| C | -0.45618800 | -12.36468400 | 5.87485200  |
| H | 0.10079900  | -12.91055600 | 5.10538800  |
| H | -1.09454700 | -13.08085700 | 6.39911900  |
| H | 0.26879100  | -11.97017100 | 6.59430000  |
| C | 1.21775100  | -0.22005600  | -0.00953600 |
| C | 1.33061500  | 1.15097900   | -0.01853000 |
| H | 2.31347700  | 1.57405200   | 0.13300300  |
| C | 0.18010400  | 1.96263300   | -0.18779000 |
| N | 0.25873200  | 3.30129500   | -0.19394100 |
| C | -1.05503000 | 1.28721600   | -0.34994400 |
| H | -1.98290600 | 1.82188600   | -0.49436800 |
| C | -1.10853000 | -0.09014200  | -0.37031400 |
| C | 1.55953400  | 3.95569300   | -0.12504200 |
| C | -0.95769300 | 4.10120200   | -0.26680400 |
| H | 1.41595200  | 5.03178600   | -0.19011600 |
| H | 2.19623500  | 3.63881500   | -0.95733000 |
| H | 2.06680900  | 3.72678500   | 0.81835100  |
| H | -1.49526700 | 3.91389700   | -1.20219000 |
| H | -0.69035700 | 5.15453700   | -0.22523000 |
| H | -1.62025800 | 3.87475700   | 0.57472000  |
| C | -1.47663400 | -14.36700400 | 1.85939300  |
| C | -2.59173200 | -13.53626000 | 1.81616600  |
| C | -2.42946700 | -12.15538900 | 1.62789500  |
| C | -0.02250700 | -12.46221600 | 1.53232200  |
| C | -0.19577500 | -13.84038600 | 1.72699800  |
| H | -1.60709100 | -15.43430000 | 2.00360300  |
| C | -3.54863100 | -11.26231400 | 1.63389300  |
| C | -4.45348900 | -10.45667600 | 1.67599800  |
| C | -7.85495100 | -8.92457000  | 1.80801600  |
| C | -7.53753600 | -7.57580000  | 1.90732000  |
| C | -6.19369000 | -7.16832800  | 1.92572900  |
| C | -5.50365700 | -9.48568900  | 1.74292900  |
| C | -6.84820000 | -9.88162100  | 1.72909900  |
| H | -8.89470700 | -9.23411100  | 1.79091100  |
| C | -5.87116400 | -5.77827100  | 2.03866200  |
| C | -5.62797700 | -4.59500500  | 2.13363200  |
| C | -6.31071100 | -0.94827600  | 2.42366200  |
| C | -5.02692000 | -0.43539100  | 2.55590200  |
| C | -3.91813700 | -1.29813900  | 2.53334300  |
| C | -5.40416900 | -3.18695600  | 2.26097300  |
| C | -6.50465600 | -2.31757600  | 2.28147300  |
| H | -7.16487300 | -0.27957200  | 2.43282100  |
| C | 2.35970700  | -1.04512200  | 0.20347200  |
| C | 3.33169900  | -1.74543000  | 0.38030900  |
| C | 6.88269800  | -2.80193700  | 0.76250300  |
| C | 6.74557400  | -4.18324400  | 0.82694500  |

|    |             |              |            |
|----|-------------|--------------|------------|
| C  | 5.47134900  | -4.77272000  | 0.77269900 |
| C  | 4.48779500  | -2.56812800  | 0.56023000 |
| C  | 5.76159600  | -1.98733400  | 0.63388800 |
| H  | 7.87113100  | -2.35650700  | 0.80866700 |
| C  | 5.32735500  | -6.19323800  | 0.87298300 |
| C  | 5.21705400  | -7.39606000  | 0.97016700 |
| C  | 6.09619900  | -11.00719200 | 1.27574700 |
| C  | 4.83672600  | -11.59066200 | 1.33954400 |
| C  | 3.68584800  | -10.78748700 | 1.28412600 |
| C  | 5.08646500  | -8.81701700  | 1.09228800 |
| C  | 6.22880800  | -9.62802500  | 1.15379600 |
| H  | 6.98252600  | -11.63191400 | 1.31482900 |
| C  | 1.28696600  | -11.89123100 | 1.42839700 |
| C  | 2.38506400  | -11.38158500 | 1.35980500 |
| C  | -1.14352800 | -11.62826500 | 1.47098600 |
| C  | -5.18037100 | -8.12599100  | 1.83469900 |
| C  | -4.10523000 | -2.67411400  | 2.36954700 |
| C  | 4.34286300  | -3.95926300  | 0.63013900 |
| C  | 3.81567300  | -9.40136200  | 1.15535100 |
| H  | -3.58913400 | -13.94541200 | 1.93601300 |
| H  | 0.67497600  | -14.48614200 | 1.76739600 |
| H  | -8.31999600 | -6.82736600  | 1.97439600 |
| H  | -7.09177600 | -10.93565300 | 1.64876700 |
| H  | -4.86645500 | 0.63061200   | 2.67766400 |
| H  | -7.50401900 | -2.72712000  | 2.17939000 |
| H  | 7.61875600  | -4.81878600  | 0.92867500 |
| H  | 5.86015800  | -0.90837100  | 0.57104900 |
| H  | 4.72974300  | -12.66605900 | 1.43438100 |
| H  | 7.21032000  | -9.17004700  | 1.09352700 |
| H  | -1.01561600 | -10.56405200 | 1.29951700 |
| H  | -4.14084100 | -7.81326900  | 1.82651600 |
| H  | -3.25242800 | -3.34244300  | 2.29679900 |
| H  | 3.35511300  | -4.40449600  | 0.56603500 |
| H  | 2.92947800  | -8.77670900  | 1.10412800 |
| C  | 0.82377000  | 2.66348800   | 3.09716100 |
| C  | -1.53081500 | -0.20215400  | 2.82202300 |
| C  | -2.60678600 | -0.74106800  | 2.67654700 |
| C  | 2.03770800  | 2.01404100   | 3.30022200 |
| C  | 2.08367800  | 0.61271500   | 3.36869100 |
| C  | -0.31031000 | 0.52627500   | 2.99154000 |
| C  | -0.34650600 | 1.92973000   | 2.94848900 |
| H  | 0.78870100  | 3.74797300   | 3.06109900 |
| C  | 0.90732200  | -0.12910700  | 3.20694600 |
| H  | 2.95350200  | 2.58218700   | 3.42623400 |
| H  | -1.29875100 | 2.42805900   | 2.79601600 |
| H  | 0.94036600  | -1.21289000  | 3.25448800 |
| C  | 3.32264400  | -0.05180700  | 3.65588800 |
| C  | 4.36876000  | -0.60055300  | 3.95271600 |
| Si | 5.91476400  | -1.42467400  | 4.55588700 |

|   |             |              |             |
|---|-------------|--------------|-------------|
| C | 7.39594700  | -0.63738600  | 3.71240100  |
| C | 5.76271100  | -3.26011400  | 4.20822000  |
| C | 6.02814300  | -1.12711500  | 6.40749500  |
| H | 7.51046900  | 0.39998600   | 4.04031500  |
| H | 7.30182400  | -0.64379900  | 2.62460600  |
| H | 8.30876700  | -1.17947100  | 3.97922500  |
| H | 5.47985400  | -3.44684000  | 3.16919100  |
| H | 5.00036100  | -3.70395600  | 4.85596600  |
| H | 6.71257700  | -3.76868000  | 4.40201000  |
| H | 5.16365400  | -1.54835200  | 6.92816500  |
| H | 6.07942300  | -0.05846500  | 6.63368100  |
| H | 6.93009900  | -1.60182500  | 6.80725000  |
| C | -0.00120700 | -14.36636300 | -1.64854900 |
| C | 1.19384400  | -13.66634900 | -1.76867700 |
| C | 1.17762800  | -12.26731700 | -1.87841600 |
| C | -1.24478700 | -12.29484300 | -1.74419700 |
| C | -1.21829900 | -13.69262500 | -1.63643700 |
| H | 0.01568900  | -15.44720900 | -1.55537900 |
| C | 2.39436000  | -11.52074500 | -1.98487500 |
| C | 3.40495000  | -10.85587800 | -2.05644200 |
| C | 6.98589200  | -9.80801400  | -2.16994200 |
| C | 6.85940300  | -8.42814700  | -2.27526600 |
| C | 5.58496100  | -7.84033200  | -2.32124500 |
| C | 4.57895800  | -10.04045800 | -2.13680600 |
| C | 5.85630900  | -10.61703400 | -2.10181200 |
| H | 7.97301300  | -10.25712700 | -2.13394500 |
| C | 5.44688100  | -6.41931000  | -2.43603200 |
| C | 5.33438100  | -5.21606800  | -2.52867700 |
| C | 6.32673800  | -1.62940800  | -2.71414000 |
| C | 5.09288200  | -1.00798400  | -2.85256600 |
| C | 3.91717200  | -1.77652800  | -2.89342400 |
| C | 5.23924600  | -3.79145700  | -2.64099100 |
| C | 6.40646900  | -3.01380800  | -2.61011900 |
| H | 7.23209000  | -1.03236600  | -2.68306700 |
| C | -2.35170500 | -0.75337500  | -0.58680400 |
| C | -3.40798200 | -1.32440100  | -0.74827300 |
| C | -7.05991900 | -1.94253900  | -1.11131600 |
| C | -7.09382000 | -3.32998400  | -1.18602900 |
| C | -5.90192900 | -4.07157700  | -1.13959700 |
| C | -4.65205500 | -2.01028100  | -0.92360600 |
| C | -5.84508200 | -1.27563000  | -0.99006200 |
| H | -7.98550700 | -1.37721900  | -1.14712300 |
| C | -5.93445400 | -5.49856900  | -1.25020100 |
| C | -5.96425700 | -6.70577400  | -1.34914500 |
| C | -7.17246900 | -10.21969900 | -1.67374400 |
| C | -5.97082200 | -10.91523900 | -1.71270700 |
| C | -4.75224700 | -10.22163600 | -1.63368400 |
| C | -5.96646700 | -8.13279100  | -1.47097600 |
| C | -7.17764800 | -8.83363500  | -1.55590500 |

|    |             |              |             |
|----|-------------|--------------|-------------|
| H  | -8.11157400 | -10.75995700 | -1.73270000 |
| C  | -2.48404000 | -11.57837800 | -1.71128600 |
| C  | -3.51748400 | -10.94641600 | -1.67572500 |
| C  | -0.04344000 | -11.58705900 | -1.86219000 |
| C  | 4.44839700  | -8.65076100  | -2.24729400 |
| C  | 3.99205100  | -3.16791300  | -2.77989100 |
| C  | -4.67680000 | -3.40976300  | -0.99089900 |
| C  | -4.75016900 | -8.82837700  | -1.50576800 |
| H  | 2.14353500  | -14.19059400 | -1.77375200 |
| H  | -2.15074100 | -14.23666100 | -1.53081400 |
| H  | 7.73898700  | -7.79528600  | -2.32539100 |
| H  | 5.95218000  | -11.69370400 | -2.00991500 |
| H  | 5.02284700  | 0.07139400   | -2.93526900 |
| H  | 7.36718900  | -3.50420500  | -2.49531100 |
| H  | -8.03931700 | -3.85169500  | -1.29001400 |
| H  | -5.80884700 | -0.19261300  | -0.92760100 |
| H  | -5.96090800 | -11.99611700 | -1.80525600 |
| H  | -8.11310200 | -8.28538700  | -1.51921500 |
| H  | -0.06017200 | -10.50464100 | -1.93243000 |
| H  | 3.46095900  | -8.20162000  | -2.26992900 |
| H  | 3.08600900  | -3.76493800  | -2.79606800 |
| H  | -3.75474400 | -3.97700800  | -0.89069900 |
| H  | -3.81584900 | -8.27927300  | -1.41935900 |
| C  | -0.36361100 | 2.66299500   | -3.46287100 |
| C  | 1.65015300  | -0.45133700  | -3.18825300 |
| C  | 2.66231200  | -1.10373700  | -3.04817900 |
| C  | -1.64306900 | 2.15610200   | -3.66720300 |
| C  | -1.84917600 | 0.76912200   | -3.73227300 |
| C  | 0.51864800  | 0.41069600   | -3.35334400 |
| C  | 0.71509000  | 1.80068200   | -3.31139900 |
| H  | -0.20472600 | 3.73635600   | -3.42838500 |
| C  | -0.76595200 | -0.10225600  | -3.56707600 |
| H  | -2.48733200 | 2.82536800   | -3.79587100 |
| H  | 1.71752900  | 2.18872400   | -3.16035100 |
| H  | -0.92277500 | -1.17525400  | -3.61076000 |
| C  | -3.15723600 | 0.25738200   | -4.02433500 |
| C  | -4.26377000 | -0.14914600  | -4.33011400 |
| Si | -5.89874900 | -0.75915200  | -4.95127100 |
| C  | -7.26685900 | 0.23246200   | -4.13449300 |
| C  | -6.01100700 | -2.59195900  | -4.58016700 |
| C  | -5.94279100 | -0.46367800  | -6.80627700 |
| H  | -7.18702500 | 1.28906900   | -4.40585600 |
| H  | -7.23296300 | 0.15390300   | -3.04590100 |
| H  | -8.24224900 | -0.13123300  | -4.47288600 |
| H  | -5.76495800 | -2.79656200  | -3.53522000 |
| H  | -5.31403200 | -3.15086800  | -5.21165600 |
| H  | -7.02154400 | -2.96515500  | -4.77403400 |
| H  | -5.13191300 | -0.99601400  | -7.31084300 |
| H  | -5.85229400 | 0.60099500   | -7.03895400 |



|    |             |              |              |             |
|----|-------------|--------------|--------------|-------------|
|    | H           | -6.89190800  | -0.82160700  | -7.21796400 |
| 3e | N           | 0.05658500   | -0.84413000  | -0.18621500 |
|    | C           | -0.13207700  | -3.72765500  | -0.46099900 |
|    | H           | 0.19207800   | -3.51752800  | 0.55754300  |
|    | H           | 0.63760700   | -3.42547400  | -1.16881500 |
|    | H           | -1.06472000  | -3.20618200  | -0.67147500 |
|    | O           | -0.28671700  | -5.16071800  | -0.66064200 |
|    | S           | -1.43210500  | -5.90485100  | 0.18460700  |
|    | O           | -2.28375200  | -6.60777300  | -0.76715700 |
|    | O           | -2.05377300  | -4.95096400  | 1.09606000  |
|    | C           | -0.45888300  | -7.10064100  | 1.11529900  |
|    | H           | 0.30764400   | -6.49031600  | 1.60594100  |
|    | C           | -1.37682900  | -7.74907500  | 2.14885500  |
|    | H           | -0.77784800  | -8.39761300  | 2.79407500  |
|    | H           | -2.13529700  | -8.36316200  | 1.64854100  |
|    | H           | -1.86994500  | -7.00192800  | 2.77559800  |
|    | C           | 0.15968100   | -8.11223500  | 0.15549300  |
|    | H           | 0.83763700   | -7.63703000  | -0.55754000 |
|    | H           | -0.63192100  | -8.63140300  | -0.39369000 |
|    | H           | 0.72396600   | -8.85387200  | 0.72965700  |
|    | C           | 1.21894400   | -0.19441800  | -0.02180200 |
|    | C           | 1.36415100   | 1.18903800   | -0.04627600 |
|    | H           | 2.34850800   | 1.61550200   | 0.09561000  |
|    | C           | 0.22268800   | 1.99676100   | -0.22899400 |
|    | N           | 0.30261900   | 3.35354100   | -0.25039300 |
|    | C           | -1.00537900  | 1.32232300   | -0.39042100 |
|    | H           | -1.93384300  | 1.85508800   | -0.54839900 |
|    | C           | -1.02265100  | -0.06907600  | -0.37301600 |
|    | C           | 1.59995100   | 4.00028200   | -0.19000100 |
|    | C           | -0.91219100  | 4.14431800   | -0.31438700 |
|    | H           | 1.46423900   | 5.07747300   | -0.27252800 |
|    | H           | 2.24260200   | 3.67020700   | -1.01493600 |
|    | H           | 2.11458700   | 3.78708400   | 0.75524500  |
|    | H           | -1.46433700  | 3.95800400   | -1.24357700 |
|    | H           | -0.65191000  | 5.20081200   | -0.27540300 |
|    | H           | -1.57343900  | 3.91892500   | 0.53110000  |
|    | C           | -1.41609800  | -14.17554500 | 1.93539000  |
|    | C           | -2.52022300  | -13.32955100 | 1.93451700  |
|    | C           | -2.34198400  | -11.94449600 | 1.79624300  |
|    | C           | 0.06023800   | -12.28155800 | 1.65333400  |
|    | C           | -0.12970500  | -13.66299400 | 1.80139200  |
| H  | -1.55974600 | -15.24549400 | 2.04310700   |             |
| C  | -3.45814000 | -11.04592000 | 1.82389600   |             |
| C  | -4.38410000 | -10.26449700 | 1.87261300   |             |
| C  | -7.83567700 | -8.84448700  | 1.98985600   |             |
| C  | -7.56732100 | -7.48302700  | 2.06453000   |             |
| C  | -6.23881500 | -7.02950400  | 2.07703300   |             |
| C  | -5.46615400 | -9.32660700  | 1.93295300   |             |
| C  | -6.79679900 | -9.76789000  | 1.92622300   |             |

|   |             |              |            |
|---|-------------|--------------|------------|
| H | -8.86382200 | -9.19071100  | 1.97766900 |
| C | -5.95064000 | -5.62950500  | 2.16220000 |
| C | -5.71355100 | -4.44316700  | 2.23444300 |
| C | -6.43648300 | -0.79887400  | 2.44462300 |
| C | -5.15896400 | -0.26744700  | 2.56778400 |
| C | -4.03910500 | -1.11579100  | 2.57543000 |
| C | -5.50412900 | -3.03007800  | 2.33846100 |
| C | -6.61459800 | -2.17277000  | 2.33285300 |
| H | -7.29824600 | -0.13989000  | 2.43465800 |
| C | 2.38042900  | -1.01713600  | 0.19843100 |
| C | 3.36774900  | -1.69658400  | 0.37463900 |
| C | 6.93833500  | -2.68078600  | 0.81123700 |
| C | 6.83572100  | -4.06488300  | 0.87731600 |
| C | 5.57693500  | -4.68162900  | 0.79312800 |
| C | 4.53795800  | -2.50123300  | 0.55767800 |
| C | 5.79969500  | -1.89607500  | 0.65439600 |
| H | 7.91347600  | -2.20909600  | 0.87985500 |
| C | 5.46182000  | -6.10573300  | 0.88545700 |
| C | 5.36336400  | -7.31010200  | 0.97810300 |
| C | 6.19900700  | -10.94078900 | 1.20911500 |
| C | 4.93263900  | -11.50386500 | 1.31366500 |
| C | 3.79514400  | -10.68000800 | 1.31281800 |
| C | 5.22461600  | -8.73098200  | 1.09090700 |
| C | 6.35311500  | -9.56253800  | 1.09885400 |
| H | 7.07468500  | -11.58145600 | 1.20700900 |
| C | 1.37610400  | -11.72928700 | 1.52477400 |
| C | 2.48467100  | -11.24775300 | 1.42606900 |
| C | -1.05011300 | -11.43139500 | 1.64638600 |
| C | -5.19467700 | -7.95480200  | 2.00534900 |
| C | -4.21321200 | -2.49832400  | 2.45139200 |
| C | 4.43154200  | -3.89555700  | 0.62691100 |
| C | 3.94794100  | -9.29546000  | 1.19736300 |
| H | -3.52179100 | -13.73032400 | 2.04764900 |
| H | 0.73169500  | -14.32218300 | 1.80173200 |
| H | -8.37633000 | -6.76220700  | 2.11666200 |
| H | -7.00503300 | -10.83046400 | 1.86142400 |
| H | -5.01221300 | 0.80344700   | 2.66100500 |
| H | -7.60863600 | -2.59566500  | 2.23336600 |
| H | 7.72117700  | -4.67908900  | 1.00198500 |
| H | 5.87454900  | -0.81525100  | 0.58970200 |
| H | 4.81076000  | -12.57851000 | 1.39799300 |
| H | 7.34004300  | -9.12206500  | 1.00636900 |
| H | -0.90655500 | -10.36517300 | 1.51930200 |
| H | -4.17053900 | -7.60010400  | 2.00233200 |
| H | -3.35212900 | -3.15882400  | 2.42546100 |
| H | 3.45760900  | -4.36758300  | 0.54600600 |
| H | 3.07526700  | -8.65090000  | 1.18964200 |
| C | 0.73158500  | 2.84784400   | 3.03324400 |
| C | -1.65813400 | 0.00269600   | 2.83654000 |

|    |             |              |             |
|----|-------------|--------------|-------------|
| C  | -2.73350100 | -0.54204500  | 2.70996500  |
| C  | 1.93444100  | 2.18972300   | 3.26817900  |
| C  | 1.96248800  | 0.79035500   | 3.37368700  |
| C  | -0.42886700 | 0.72317900   | 2.97983300  |
| C  | -0.44623700 | 2.12468800   | 2.89665500  |
| H  | 0.71174100  | 3.93074500   | 2.95925500  |
| C  | 0.77900600  | 0.05918700   | 3.21908200  |
| H  | 2.85648800  | 2.74966900   | 3.38601700  |
| H  | -1.38995800 | 2.63052100   | 2.71915700  |
| H  | 0.79839300  | -1.02337700  | 3.28770300  |
| C  | 3.19326400  | 0.12014900   | 3.68405900  |
| C  | 4.23691300  | -0.42570500  | 3.99542600  |
| Si | 5.78430200  | -1.24685200  | 4.59505400  |
| C  | 7.26561300  | -0.43959900  | 3.77064500  |
| C  | 5.66408800  | -3.08067100  | 4.22394800  |
| C  | 5.88960200  | -0.97321600  | 6.45120400  |
| H  | 7.36047900  | 0.60144200   | 4.09295500  |
| H  | 7.18812800  | -0.45602100  | 2.68169300  |
| H  | 8.18179900  | -0.96707500  | 4.05497800  |
| H  | 5.40721200  | -3.26184200  | 3.17714500  |
| H  | 4.89831400  | -3.54513300  | 4.85247000  |
| H  | 6.61937800  | -3.57357200  | 4.43142700  |
| H  | 5.03057000  | -1.41317200  | 6.96510500  |
| H  | 5.92515500  | 0.09293700   | 6.69171100  |
| H  | 6.79756400  | -1.44009500  | 6.84644400  |
| C  | 0.05628100  | -14.27605600 | -1.52371400 |
| C  | 1.23517500  | -13.55245600 | -1.66092400 |
| C  | 1.18969100  | -12.15417800 | -1.77548300 |
| C  | -1.22989100 | -12.22992300 | -1.60116700 |
| C  | -1.17380500 | -13.62650500 | -1.49172500 |
| H  | 0.09602800  | -15.35644200 | -1.43143800 |
| C  | 2.39144500  | -11.38678700 | -1.90305100 |
| C  | 3.39467600  | -10.71506600 | -2.00713600 |
| C  | 6.98436300  | -9.73065100  | -2.25709600 |
| C  | 6.88106400  | -8.34787900  | -2.34769400 |
| C  | 5.61789200  | -7.73425700  | -2.33864600 |
| C  | 4.57600500  | -9.91506500  | -2.12784600 |
| C  | 5.84225400  | -10.51717300 | -2.14910300 |
| H  | 7.96298400  | -10.19964300 | -2.26460000 |
| C  | 5.50849000  | -6.30990400  | -2.44304900 |
| C  | 5.42616100  | -5.10415100  | -2.53565600 |
| C  | 6.48239100  | -1.53367600  | -2.68422700 |
| C  | 5.26093100  | -0.89167400  | -2.84140400 |
| C  | 4.07351200  | -1.63958200  | -2.90574400 |
| C  | 5.36110600  | -3.67711200  | -2.64047200 |
| C  | 6.54009400  | -2.91945300  | -2.58445700 |
| H  | 7.39609000  | -0.95068200  | -2.63493400 |
| C  | -2.27378200 | -0.75686000  | -0.56809200 |
| C  | -3.33244100 | -1.32904500  | -0.71120500 |

|   |             |              |             |
|---|-------------|--------------|-------------|
| C | -6.99840800 | -1.90694200  | -1.05178700 |
| C | -7.05624500 | -3.29352300  | -1.11978200 |
| C | -5.87472800 | -4.05037400  | -1.06361600 |
| C | -4.58716000 | -2.00429200  | -0.86095700 |
| C | -5.77352800 | -1.25867100  | -0.92621600 |
| H | -7.91419700 | -1.32588000  | -1.09317200 |
| C | -5.92504500 | -5.47831200  | -1.15229200 |
| C | -5.95784400 | -6.68719300  | -1.22942600 |
| C | -7.18941600 | -10.20327700 | -1.45547900 |
| C | -5.99166900 | -10.90656100 | -1.49619300 |
| C | -4.77015000 | -10.21600400 | -1.45397700 |
| C | -5.97399100 | -8.11651600  | -1.31885000 |
| C | -7.18874400 | -8.81461900  | -1.37075200 |
| H | -8.13144300 | -10.74069600 | -1.48737800 |
| C | -2.48283300 | -11.53855400 | -1.55363600 |
| C | -3.53073100 | -10.93134700 | -1.50777600 |
| C | -0.04458300 | -11.49982300 | -1.74581100 |
| C | 4.46877100  | -8.52225900  | -2.22345100 |
| C | 4.12779500  | -3.03248400  | -2.79965800 |
| C | -4.64198100 | -3.40225500  | -0.92390000 |
| C | -4.76412700 | -8.82095100  | -1.35719900 |
| H | 2.19504100  | -14.05761100 | -1.67844300 |
| H | -2.09360700 | -14.18872700 | -1.37139400 |
| H | 7.77036500  | -7.73194200  | -2.42911300 |
| H | 5.91975300  | -11.59625900 | -2.06853200 |
| H | 5.21053500  | 0.18913400   | -2.91973900 |
| H | 7.49089500  | -3.42499100  | -2.45421800 |
| H | -8.00889200 | -3.80196600  | -1.22313100 |
| H | -5.72271000 | -0.17632700  | -0.86269000 |
| H | -5.98870400 | -11.98921400 | -1.56448300 |
| H | -8.12203000 | -8.26277500  | -1.33326400 |
| H | -0.08257000 | -10.41983500 | -1.83742400 |
| H | 3.49038400  | -8.05311200  | -2.20346100 |
| H | 3.21404400  | -3.61615500  | -2.83766100 |
| H | -3.73023800 | -3.98716900  | -0.85521800 |
| H | -3.82513000 | -8.27861400  | -1.30419800 |
| C | -0.23357700 | 2.78687700   | -3.50837200 |
| C | 1.81437900  | -0.30453200  | -3.22039500 |
| C | 2.82749500  | -0.95358600  | -3.07354200 |
| C | -1.50459500 | 2.26532900   | -3.72497400 |
| C | -1.69473300 | 0.87610100   | -3.78674300 |
| C | 0.67385000  | 0.54515800   | -3.38917500 |
| C | 0.85301600  | 1.93694000   | -3.34791500 |
| H | -0.08849500 | 3.86187100   | -3.46736900 |
| C | -0.60334200 | 0.01777900   | -3.60953000 |
| H | -2.35558100 | 2.92470900   | -3.86106900 |
| H | 1.84885500  | 2.33650600   | -3.18452700 |
| H | -0.74862700 | -1.05686000  | -3.64368200 |
| C | -2.99870300 | 0.34946600   | -4.07405500 |

|  |    |             |             |             |
|--|----|-------------|-------------|-------------|
|  | C  | -4.10370400 | -0.07208600 | -4.36600100 |
|  | Si | -5.74704200 | -0.71412100 | -4.92727800 |
|  | C  | -7.10332500 | 0.28196200  | -4.09548500 |
|  | C  | -5.84251500 | -2.53737000 | -4.50606900 |
|  | C  | -5.84814600 | -0.46959900 | -6.78761800 |
|  | H  | -7.05465500 | 1.33017000  | -4.40421400 |
|  | H  | -7.02659800 | 0.23996700  | -3.00692700 |
|  | H  | -8.08364300 | -0.11107800 | -4.38330500 |
|  | H  | -5.60713700 | -2.71153800 | -3.45304300 |
|  | H  | -5.13652300 | -3.10869800 | -5.11593400 |
|  | H  | -6.84883400 | -2.92233600 | -4.69944300 |
|  | H  | -5.04364700 | -1.00325800 | -7.30092500 |
|  | H  | -5.78002900 | 0.58969300  | -7.05058700 |
|  | H  | -6.80269000 | -0.85155800 | -7.16351400 |
|  | N  | 0.04154900  | -0.84239200 | -0.19967400 |
|  | C  | -0.02605400 | -2.88830000 | -0.34257900 |
|  | H  | 0.55872600  | -2.94270200 | 0.56236300  |
|  | H  | 0.47828500  | -2.79514900 | -1.29350200 |
|  | H  | -1.09912500 | -2.81045000 | -0.27801800 |
|  | O  | -0.04463100 | -4.74702300 | -0.53968000 |
|  | S  | -1.23455900 | -5.50572700 | 0.05459800  |
|  | O  | -2.05002400 | -6.13486500 | -0.99751700 |
|  | O  | -1.98153600 | -4.65237800 | 0.99625000  |
|  | C  | -0.46437600 | -6.82928900 | 1.00806800  |
|  | H  | 0.21797800  | -6.30252000 | 1.68312800  |
|  | C  | -1.54187300 | -7.55711500 | 1.80236800  |
|  | H  | -1.07220900 | -8.26317200 | 2.49225900  |
|  | H  | -2.19723800 | -8.11636800 | 1.12446900  |
|  | H  | -2.14151400 | -6.85485300 | 2.38583900  |
|  | C  | 0.30063300  | -7.76484500 | 0.07848500  |
|  | H  | 1.10623400  | -7.24434500 | -0.44457000 |
|  | H  | -0.38570100 | -8.18963900 | -0.66042600 |
|  | H  | 0.73160700  | -8.58813600 | 0.65814800  |
|  | C  | 1.21511400  | -0.20900600 | -0.02001200 |
|  | C  | 1.34983200  | 1.17115800  | -0.02876500 |
|  | H  | 2.33278400  | 1.59521500  | 0.12526000  |
|  | C  | 0.20602200  | 1.98090400  | -0.20660900 |
|  | N  | 0.28626300  | 3.33118200  | -0.21732300 |
|  | C  | -1.02500700 | 1.30834100  | -0.37311800 |
|  | H  | -1.95384600 | 1.84191200  | -0.52209800 |
|  | C  | -1.05238800 | -0.07869000 | -0.37922500 |
|  | C  | 1.58516000  | 3.97928500  | -0.14553600 |
|  | C  | -0.92843800 | 4.12623700  | -0.28775200 |
|  | H  | 1.44845300  | 5.05611600  | -0.22481100 |
|  | H  | 2.23106300  | 3.65175800  | -0.96799300 |
|  | H  | 2.09047600  | 3.76162800  | 0.80295500  |
|  | H  | -1.47242100 | 3.94049400  | -1.22109000 |
|  | H  | -0.66482600 | 5.18133500  | -0.24668500 |
|  | H  | -1.59339400 | 3.90128100  | 0.55393300  |

|   |             |              |            |
|---|-------------|--------------|------------|
| C | -1.42333400 | -14.15918100 | 1.95471800 |
| C | -2.53793100 | -13.32762100 | 1.94506800 |
| C | -2.37749100 | -11.94027600 | 1.80746500 |
| C | 0.02862200  | -12.24381700 | 1.68571800 |
| C | -0.14386300 | -13.62791900 | 1.83221000 |
| H | -1.55310500 | -15.23107500 | 2.06068000 |
| C | -3.50976800 | -11.06264300 | 1.82555100 |
| C | -4.45456000 | -10.30370600 | 1.86014500 |
| C | -7.91256100 | -8.88796700  | 1.92452900 |
| C | -7.64349500 | -7.52673900  | 2.00690200 |
| C | -6.31484700 | -7.07560500  | 2.04529400 |
| C | -5.54403300 | -9.37427200  | 1.90779500 |
| C | -6.87477700 | -9.81379300  | 1.87625000 |
| H | -8.94105200 | -9.23198600  | 1.89362000 |
| C | -6.01768400 | -5.67791000  | 2.13732900 |
| C | -5.75330600 | -4.49750000  | 2.21200500 |
| C | -6.36319800 | -0.83354400  | 2.45541200 |
| C | -5.06869100 | -0.34411000  | 2.57067200 |
| C | -3.97628800 | -1.22762100  | 2.55451700 |
| C | -5.50248300 | -3.09139200  | 2.31827700 |
| C | -6.58553600 | -2.20045100  | 2.33422500 |
| H | -7.20380700 | -0.14781700  | 2.46143200 |
| C | 2.37358000  | -1.02872800  | 0.19962700 |
| C | 3.36360000  | -1.70415200  | 0.37342400 |
| C | 6.94084100  | -2.68293200  | 0.74599000 |
| C | 6.83747800  | -4.06596100  | 0.82858900 |
| C | 5.57659400  | -4.68252000  | 0.78545100 |
| C | 4.53721800  | -2.50493000  | 0.54930300 |
| C | 5.79963000  | -1.89768400  | 0.61125200 |
| H | 7.91811300  | -2.21249300  | 0.78350000 |
| C | 5.46259800  | -6.10380600  | 0.90591700 |
| C | 5.36493800  | -7.30563000  | 1.02475600 |
| C | 6.17755800  | -10.93141800 | 1.37549100 |
| C | 4.90560700  | -11.48582400 | 1.45556300 |
| C | 3.77315300  | -10.65731100 | 1.39830500 |
| C | 5.21870600  | -8.72226000  | 1.16918800 |
| C | 6.34233500  | -9.55726900  | 1.23378200 |
| H | 7.04927600  | -11.57588000 | 1.41679700 |
| C | 1.34215400  | -11.68400300 | 1.57137300 |
| C | 2.45673300  | -11.21419200 | 1.48855700 |
| C | -1.09221200 | -11.40698600 | 1.66670300 |
| C | -5.27225100 | -8.00375300  | 1.99090100 |
| C | -4.19303500 | -2.60212900  | 2.41436600 |
| C | 4.42814000  | -3.89778000  | 0.63664100 |
| C | 3.93656200  | -9.27753400  | 1.25099900 |
| H | -3.53524400 | -13.74088500 | 2.05074500 |
| H | 0.72711100  | -14.27426600 | 1.84029200 |
| H | -8.45266400 | -6.80520500  | 2.04558400 |
| H | -7.08421800 | -10.87567300 | 1.80403300 |

|    |             |              |             |
|----|-------------|--------------|-------------|
| H  | -4.88725300 | 0.72033000   | 2.67543700  |
| H  | -7.59354600 | -2.59134100  | 2.24474100  |
| H  | 7.72512000  | -4.68009700  | 0.93659600  |
| H  | 5.87376100  | -0.81755700  | 0.53561200  |
| H  | 4.77525000  | -12.55723300 | 1.56440400  |
| H  | 7.33374000  | -9.12341500  | 1.15978100  |
| H  | -0.96483500 | -10.33816800 | 1.53389300  |
| H  | -4.24622300 | -7.65678800  | 2.00608300  |
| H  | -3.35309600 | -3.28754800  | 2.35752200  |
| H  | 3.45136800  | -4.36823200  | 0.58276500  |
| H  | 3.06765700  | -8.63034200  | 1.19997700  |
| C  | 0.78088700  | 2.70797900   | 3.07132500  |
| C  | -1.57341300 | -0.15913800  | 2.81997600  |
| C  | -2.65461100 | -0.69090800  | 2.68657200  |
| C  | 1.99342000  | 2.06174900   | 3.28860400  |
| C  | 2.04117500  | 0.66097200   | 3.36434400  |
| C  | -0.34983500 | 0.56833500   | 2.97509600  |
| C  | -0.38681700 | 1.97110600   | 2.92173400  |
| H  | 0.74507900  | 3.79184200   | 3.02321700  |
| C  | 0.86769700  | -0.08391100  | 3.19764100  |
| H  | 2.90783100  | 2.63158100   | 3.41738800  |
| H  | -1.33832700 | 2.46685800   | 2.75803000  |
| H  | 0.90252300  | -1.16741500  | 3.24506500  |
| C  | 3.28177800  | 0.00430400   | 3.66307200  |
| C  | 4.33357600  | -0.52859300  | 3.96879700  |
| Si | 5.89223000  | -1.33023900  | 4.56612200  |
| C  | 7.36035400  | -0.51178300  | 3.72950000  |
| C  | 5.78177200  | -3.16508300  | 4.20008700  |
| C  | 6.00296600  | -1.04802100  | 6.42042400  |
| H  | 7.44917900  | 0.53004000   | 4.05103900  |
| H  | 7.27332700  | -0.52864200  | 2.64125600  |
| H  | 8.28328800  | -1.03150100  | 4.00582200  |
| H  | 5.50231300  | -3.34522300  | 3.15921200  |
| H  | 5.03225600  | -3.63527700  | 4.84355200  |
| H  | 6.74433800  | -3.65209000  | 4.38558300  |
| H  | 5.15065100  | -1.49487300  | 6.93948900  |
| H  | 6.02913200  | 0.01917700   | 6.65731500  |
| H  | 6.91717700  | -1.50476800  | 6.81302700  |
| C  | 0.06300500  | -14.29161700 | -1.50799500 |
| C  | 1.26329700  | -13.60041600 | -1.62702300 |
| C  | 1.25808000  | -12.20046500 | -1.72380300 |
| C  | -1.16323900 | -12.20843400 | -1.57267000 |
| C  | -1.14798200 | -13.60765600 | -1.48081200 |
| H  | 0.07097400  | -15.37364700 | -1.42883000 |
| C  | 2.47751400  | -11.46031600 | -1.83970900 |
| C  | 3.48698000  | -10.79660500 | -1.93278700 |
| C  | 7.06646000  | -9.75048400  | -2.09115800 |
| C  | 6.93859700  | -8.37290100  | -2.22071200 |
| C  | 5.66367700  | -7.78653000  | -2.26929200 |

|   |             |              |             |
|---|-------------|--------------|-------------|
| C | 4.66041300  | -9.98345000  | -2.03739000 |
| C | 5.93794700  | -10.55886800 | -2.00090800 |
| H | 8.05396300  | -10.19826000 | -2.05291200 |
| C | 5.52295300  | -6.36787000  | -2.40605000 |
| C | 5.40466600  | -5.16688700  | -2.51820500 |
| C | 6.38237900  | -1.57952600  | -2.74830400 |
| C | 5.14539900  | -0.96467800  | -2.88899200 |
| C | 3.97207900  | -1.73726900  | -2.91560000 |
| C | 5.30435400  | -3.74394300  | -2.64609300 |
| C | 6.46871200  | -2.96207000  | -2.62839900 |
| H | 7.28515600  | -0.97833800  | -2.72775300 |
| C | -2.30192900 | -0.75660800  | -0.58632800 |
| C | -3.36377600 | -1.32116600  | -0.73243700 |
| C | -7.03332300 | -1.89011200  | -1.04390700 |
| C | -7.09001100 | -3.27691900  | -1.11087000 |
| C | -5.90738000 | -4.03268400  | -1.06974100 |
| C | -4.62253900 | -1.98811700  | -0.87950000 |
| C | -5.80760000 | -1.24037500  | -0.93378200 |
| H | -7.95019400 | -1.31032900  | -1.07434300 |
| C | -5.95082500 | -5.45992700  | -1.16124700 |
| C | -5.95929800 | -6.66842800  | -1.24474800 |
| C | -7.10660900 | -10.20832000 | -1.50647600 |
| C | -5.89253600 | -10.88244800 | -1.52966100 |
| C | -4.68681600 | -10.16534900 | -1.46286000 |
| C | -5.94086300 | -8.09617700  | -1.34092300 |
| C | -7.13857300 | -8.82063300  | -1.41505900 |
| H | -8.03523500 | -10.76720200 | -1.55572000 |
| C | -2.39878800 | -11.48671100 | -1.53324400 |
| C | -3.43934700 | -10.86682100 | -1.49601700 |
| C | 0.04301700  | -11.51051400 | -1.69293300 |
| C | 4.52848600  | -8.59619400  | -2.17294900 |
| C | 4.05443800  | -3.12674000  | -2.78711100 |
| C | -4.67265500 | -3.38624900  | -0.94164800 |
| C | -4.71351600 | -8.77115200  | -1.36185300 |
| H | 2.20813400  | -14.13293700 | -1.64560800 |
| H | -2.08465200 | -14.14471700 | -1.37751800 |
| H | 7.81745200  | -7.74053400  | -2.28710900 |
| H | 6.03510900  | -11.63354800 | -1.88992400 |
| H | 5.07106200  | 0.11339500   | -2.98395200 |
| H | 7.43167600  | -3.44747700  | -2.51166700 |
| H | -8.04350900 | -3.78604200  | -1.20268400 |
| H | -5.75635200 | -0.15789600  | -0.87269200 |
| H | -5.86217300 | -11.96444000 | -1.60111400 |
| H | -8.08393600 | -8.28921600  | -1.38941200 |
| H | 0.03731500  | -10.42810000 | -1.75977700 |
| H | 3.54059800  | -8.14846300  | -2.19877100 |
| H | 3.15119600  | -3.72788900  | -2.79307900 |
| H | -3.75890500 | -3.97050900  | -0.87886700 |
| H | -3.78799500 | -8.20556800  | -1.29608600 |



|    |    |             |             |             |
|----|----|-------------|-------------|-------------|
|    | C  | -0.30626600 | 2.69726200  | -3.49318900 |
|    | C  | 1.69996800  | -0.42111800 | -3.21270100 |
|    | C  | 2.71361300  | -1.07096200 | -3.07114100 |
|    | C  | -1.58555300 | 2.19381700  | -3.70432300 |
|    | C  | -1.79554700 | 0.80735700  | -3.76584400 |
|    | C  | 0.56938800  | 0.44267200  | -3.37697100 |
|    | C  | 0.76883500  | 1.83196200  | -3.33587900 |
|    | H  | -0.14516900 | 3.77008500  | -3.45565400 |
|    | C  | -0.71575800 | -0.06655700 | -3.59351800 |
|    | H  | -2.42734400 | 2.86521800  | -3.83817100 |
|    | H  | 1.77093000  | 2.21755100  | -3.17725600 |
|    | H  | -0.87616600 | -1.13907900 | -3.63093300 |
|    | C  | -3.10605300 | 0.29858100  | -4.05374100 |
|    | C  | -4.21631000 | -0.10699500 | -4.34758600 |
|    | Si | -5.86434000 | -0.72484200 | -4.92285100 |
|    | C  | -7.21346100 | 0.27279600  | -4.08177900 |
|    | C  | -5.97133900 | -2.55264800 | -4.52556000 |
|    | C  | -5.95661800 | -0.45304000 | -6.77980300 |
|    | H  | -7.15308900 | 1.32437600  | -4.37662600 |
|    | H  | -7.14071900 | 0.21610000  | -2.99364300 |
|    | H  | -8.19669700 | -0.10628200 | -4.37807100 |
|    | H  | -5.72325300 | -2.74204800 | -3.47812600 |
|    | H  | -5.27647000 | -3.12046500 | -5.15118200 |
|    | H  | -6.98238000 | -2.92866700 | -4.71132800 |
|    | H  | -5.15533400 | -0.98688000 | -7.29791300 |
|    | H  | -5.87778600 | 0.60916800  | -7.02743900 |
|    | H  | -6.91344900 | -0.82074200 | -7.16404100 |
| 4e | N  | 0.07391900  | -0.80158500 | -0.19197800 |
|    | C  | 0.05983800  | -2.27463900 | -0.25799300 |
|    | H  | 0.59389400  | -2.67303000 | 0.60440600  |
|    | H  | 0.55847100  | -2.59806000 | -1.17345200 |
|    | H  | -0.96230900 | -2.64186900 | -0.24082100 |
|    | O  | -0.04322100 | -5.09061400 | -1.00365400 |
|    | S  | -1.23158000 | -5.68244600 | -0.33983300 |
|    | O  | -2.14385700 | -6.37690200 | -1.28214200 |
|    | O  | -1.93982600 | -4.71786000 | 0.54333400  |
|    | C  | -0.57889700 | -6.96912300 | 0.75463300  |
|    | H  | 0.12977600  | -6.43754000 | 1.39946500  |
|    | C  | -1.70602300 | -7.56298100 | 1.58718500  |
|    | H  | -1.30201600 | -8.23737000 | 2.34816000  |
|    | H  | -2.38427100 | -8.13527800 | 0.94231500  |
|    | H  | -2.27126600 | -6.77309600 | 2.08774700  |
|    | C  | 0.13905900  | -8.02911100 | -0.07240800 |
|    | H  | 0.95057800  | -7.59350900 | -0.66105700 |
|    | H  | -0.57940100 | -8.49620500 | -0.75464000 |
|    | H  | 0.55554700  | -8.80746800 | 0.57716300  |
|    | C  | 1.26443600  | -0.15324000 | -0.00578400 |
|    | C  | 1.35284600  | 1.21973600  | -0.00916900 |
|    | H  | 2.32786400  | 1.65864100  | 0.14777300  |

|   |             |              |             |
|---|-------------|--------------|-------------|
| C | 0.18927800  | 2.01244100   | -0.17748700 |
| N | 0.24467700  | 3.35197100   | -0.17738300 |
| C | -1.03300000 | 1.31580400   | -0.34543200 |
| H | -1.97001900 | 1.83422800   | -0.49050900 |
| C | -1.06199100 | -0.06239900  | -0.36990700 |
| C | 1.53430600  | 4.02803000   | -0.10576100 |
| C | -0.98521100 | 4.13111400   | -0.25074500 |
| H | 1.37299400  | 5.10158000   | -0.17056800 |
| H | 2.17730600  | 3.72178500   | -0.93719800 |
| H | 2.04372500  | 3.80715400   | 0.83838700  |
| H | -1.51370800 | 3.94314900   | -1.19132000 |
| H | -0.73671300 | 5.18860600   | -0.19732300 |
| H | -1.64842700 | 3.88505100   | 0.58472000  |
| C | -1.42815100 | -14.17069100 | 1.99459500  |
| C | -2.55549200 | -13.35615900 | 1.97628700  |
| C | -2.41510100 | -11.96765400 | 1.83148300  |
| C | -0.00411000 | -12.23479900 | 1.72047200  |
| C | -0.15651200 | -13.62077200 | 1.87394000  |
| H | -1.54195800 | -15.24383400 | 2.10633200  |
| C | -3.55763900 | -11.10329200 | 1.84085000  |
| C | -4.50906200 | -10.35250400 | 1.87125200  |
| C | -7.95210400 | -8.89286100  | 1.91723500  |
| C | -7.66394000 | -7.53525300  | 1.99893600  |
| C | -6.32908500 | -7.10435400  | 2.04891100  |
| C | -5.59109600 | -9.41431900  | 1.91794600  |
| C | -6.92780600 | -9.83426100  | 1.87637200  |
| H | -8.98535700 | -9.22170200  | 1.87922800  |
| C | -6.00774100 | -5.71167900  | 2.13796500  |
| C | -5.71584900 | -4.53733300  | 2.20611200  |
| C | -6.26550300 | -0.86367900  | 2.43908900  |
| C | -4.96420400 | -0.39502900  | 2.55819600  |
| C | -3.88597500 | -1.29608900  | 2.54376700  |
| C | -5.44017200 | -3.13579500  | 2.30714400  |
| C | -6.50858900 | -2.22724900  | 2.31970400  |
| H | -7.09530800 | -0.16491700  | 2.44174700  |
| C | 2.42405800  | -0.95322700  | 0.20776900  |
| C | 3.40703800  | -1.63625700  | 0.39122000  |
| C | 6.97087900  | -2.65917900  | 0.75062500  |
| C | 6.84512000  | -4.04036000  | 0.83756900  |
| C | 5.57487900  | -4.63917800  | 0.80662000  |
| C | 4.57210100  | -2.44621700  | 0.56971500  |
| C | 5.84216300  | -1.85515000  | 0.62218800  |
| H | 7.95610000  | -2.20533800  | 0.77960300  |
| C | 5.43782500  | -6.05775200  | 0.93445300  |
| C | 5.32060600  | -7.25704000  | 1.06053000  |
| C | 6.12976100  | -10.87814000 | 1.43823000  |
| C | 4.85837200  | -11.43386600 | 1.51279600  |
| C | 3.72433200  | -10.60834600 | 1.44190400  |
| C | 5.16708400  | -8.67240000  | 1.21137400  |

|    |             |              |            |
|----|-------------|--------------|------------|
| C  | 6.29204000  | -9.50462000  | 1.28938700 |
| H  | 7.00248300  | -11.52056700 | 1.48940400 |
| C  | 1.30205300  | -11.65700400 | 1.60799200 |
| C  | 2.41106900  | -11.17362800 | 1.52727900 |
| C  | -1.13736100 | -11.41527500 | 1.69297800 |
| C  | -5.30043500 | -8.04826000  | 2.00710300 |
| C  | -4.12290300 | -2.66671500  | 2.40144900 |
| C  | 4.43860200  | -3.83679300  | 0.66233000 |
| C  | 3.88446400  | -9.22875300  | 1.28627800 |
| H  | -3.54683900 | -13.78386000 | 2.08095700 |
| H  | 0.72402600  | -14.25399100 | 1.88865800 |
| H  | -8.46301500 | -6.80202400  | 2.02851700 |
| H  | -7.15290600 | -10.89281600 | 1.80146700 |
| H  | -4.76566500 | 0.66619000   | 2.66387600 |
| H  | -7.52242300 | -2.60260700  | 2.22975800 |
| H  | 7.72410500  | -4.66769600  | 0.94041200 |
| H  | 5.93226100  | -0.77656200  | 0.54309000 |
| H  | 4.72884600  | -12.50480300 | 1.62731300 |
| H  | 7.28282300  | -9.06857700  | 1.22000100 |
| H  | -1.02805300 | -10.34497700 | 1.55486700 |
| H  | -4.26958000 | -7.71817400  | 2.03621700 |
| H  | -3.29279100 | -3.36377100  | 2.34122300 |
| H  | 3.45395500  | -4.29080700  | 0.61436200 |
| H  | 3.01345700  | -8.58468000  | 1.22408300 |
| C  | 0.81877200  | 2.67265400   | 3.10445300 |
| C  | -1.48425000 | -0.23218400  | 2.82570700 |
| C  | -2.56035100 | -0.77162200  | 2.68199200 |
| C  | 2.04461100  | 2.04631900   | 3.30769200 |
| C  | 2.11759400  | 0.64605800   | 3.37208800 |
| C  | -0.27359000 | 0.51369400   | 2.99279200 |
| C  | -0.33659200 | 1.91643200   | 2.95260300 |
| H  | 0.76267900  | 3.75625000   | 3.07083100 |
| C  | 0.95620100  | -0.11850700  | 3.20713900 |
| H  | 2.94916400  | 2.63151900   | 3.43683300 |
| H  | -1.29807100 | 2.39671300   | 2.80040600 |
| H  | 1.01018800  | -1.20149600  | 3.25228600 |
| C  | 3.36982300  | 0.00756000   | 3.66022200 |
| C  | 4.43139900  | -0.51048000  | 3.95708000 |
| Si | 6.00096000  | -1.28961100  | 4.55820300 |
| C  | 7.45776400  | -0.47248100  | 3.70093900 |
| C  | 5.89661600  | -3.13043800  | 4.22154400 |
| C  | 6.11608100  | -0.97645600  | 6.40699700 |
| H  | 7.54069800  | 0.57417100   | 4.00818600 |
| H  | 7.36543700  | -0.50391300  | 2.61340500 |
| H  | 8.38595400  | -0.98165800  | 3.97918100 |
| H  | 5.60060800  | -3.32819700  | 3.18845400 |
| H  | 5.15965800  | -3.59421700  | 4.88404800 |
| H  | 6.86442500  | -3.61001600  | 4.39868700 |
| H  | 5.26856400  | -1.42124600  | 6.93564000 |

|   |             |              |             |
|---|-------------|--------------|-------------|
| H | 6.13532100  | 0.09457500   | 6.62668600  |
| H | 7.03473000  | -1.42044600  | 6.80378800  |
| C | 0.06095400  | -14.28189700 | -1.46321800 |
| C | 1.27026700  | -13.60604500 | -1.58313100 |
| C | 1.28072100  | -12.20742600 | -1.69360600 |
| C | -1.14135200 | -12.18534600 | -1.55109800 |
| C | -1.14225800 | -13.58397900 | -1.44602700 |
| H | 0.05591100  | -15.36321900 | -1.37407400 |
| C | 2.50490700  | -11.47467400 | -1.80568600 |
| C | 3.51159800  | -10.80613600 | -1.89448700 |
| C | 7.08264400  | -9.72666100  | -2.02597800 |
| C | 6.94234100  | -8.35087700  | -2.16264100 |
| C | 5.66212800  | -7.77738000  | -2.22595200 |
| C | 4.67850800  | -9.98310600  | -1.99353600 |
| C | 5.96132300  | -10.54568300 | -1.94281200 |
| H | 8.07412100  | -10.16453300 | -1.97712700 |
| C | 5.50890700  | -6.36073300  | -2.37094700 |
| C | 5.38070900  | -5.16140700  | -2.48965900 |
| C | 6.34899100  | -1.57341100  | -2.74432000 |
| C | 5.11053400  | -0.96121500  | -2.88160900 |
| C | 3.93875100  | -1.73656600  | -2.89805700 |
| C | 5.27415000  | -3.73963100  | -2.62497800 |
| C | 6.43714300  | -2.95528000  | -2.61788600 |
| H | 7.25118900  | -0.97121100  | -2.73111100 |
| C | -2.29611500 | -0.74049500  | -0.59343400 |
| C | -3.35762200 | -1.30584400  | -0.74003100 |
| C | -7.02350000 | -1.85963700  | -1.05601100 |
| C | -7.08588700 | -3.24676300  | -1.11318100 |
| C | -5.90814800 | -4.00970900  | -1.06735600 |
| C | -4.61492000 | -1.97302600  | -0.88969500 |
| C | -5.79447200 | -1.21628300  | -0.95212400 |
| H | -7.93764400 | -1.27606600  | -1.09023100 |
| C | -5.96069900 | -5.43682000  | -1.15376100 |
| C | -5.96409000 | -6.64533000  | -1.23571800 |
| C | -7.07585200 | -10.19636300 | -1.49710100 |
| C | -5.85454700 | -10.85674500 | -1.51799700 |
| C | -4.65644800 | -10.12646300 | -1.44909100 |
| C | -5.93195600 | -8.07305700  | -1.32946300 |
| C | -7.12220400 | -8.80900000  | -1.40491200 |
| H | -7.99836100 | -10.76523800 | -1.54733600 |
| C | -2.36836900 | -11.44863300 | -1.51586700 |
| C | -3.40496700 | -10.82171600 | -1.47798400 |
| C | 0.07319000  | -11.50393000 | -1.67638000 |
| C | 4.53402600  | -8.59779700  | -2.13669300 |
| C | 4.02204500  | -3.12537200  | -2.76178200 |
| C | -4.66795800 | -3.37170900  | -0.94126200 |
| C | -4.69527800 | -8.73234300  | -1.34927000 |
| H | 2.20882300  | -14.14984000 | -1.59153200 |
| H | -2.08515500 | -14.10946300 | -1.33967900 |

|    |    |             |              |             |
|----|----|-------------|--------------|-------------|
|    | H  | 7.81553100  | -7.71017900  | -2.22402200 |
|    | H  | 6.06804500  | -11.61892400 | -1.82656900 |
|    | H  | 5.03351300  | 0.11617500   | -2.98171200 |
|    | H  | 7.40143900  | -3.43878600  | -2.50403700 |
|    | H  | -8.04221500 | -3.75122800  | -1.20195900 |
|    | H  | -5.73622000 | -0.13364600  | -0.90157600 |
|    | H  | -5.81198600 | -11.93848800 | -1.58816800 |
|    | H  | -8.07304300 | -8.28727500  | -1.38010000 |
|    | H  | 0.08196400  | -10.42272400 | -1.75603200 |
|    | H  | 3.54202600  | -8.16005800  | -2.17381100 |
|    | H  | 3.11919100  | -3.72733300  | -2.75867800 |
|    | H  | -3.75605400 | -3.95854900  | -0.86256700 |
|    | H  | -3.77692300 | -8.15206900  | -1.28773400 |
|    | C  | -0.34594200 | 2.69749700   | -3.45343400 |
|    | C  | 1.66776800  | -0.41816800  | -3.19206400 |
|    | C  | 2.68007000  | -1.07042100  | -3.05166900 |
|    | C  | -1.62529700 | 2.19162300   | -3.66054700 |
|    | C  | -1.83151000 | 0.80497100   | -3.73159800 |
|    | C  | 0.53633200  | 0.44465500   | -3.35438000 |
|    | C  | 0.73270100  | 1.83448500   | -3.30544700 |
|    | H  | -0.18717000 | 3.77067700   | -3.41375300 |
|    | C  | -0.74818200 | -0.06715300  | -3.57128200 |
|    | H  | -2.46947600 | 2.86150700   | -3.78629100 |
|    | H  | 1.73486400  | 2.22211600   | -3.15188200 |
|    | H  | -0.90510500 | -1.13987600  | -3.62048300 |
|    | C  | -3.14071100 | 0.29414900   | -4.02019900 |
|    | C  | -4.24980200 | -0.11077900  | -4.31866200 |
|    | Si | -5.89123800 | -0.72709000  | -4.91653600 |
|    | C  | -7.24918100 | 0.26985300   | -4.08927100 |
|    | C  | -5.99745200 | -2.55722300  | -4.53107400 |
|    | C  | -5.95937100 | -0.44531400  | -6.77285500 |
|    | H  | -7.18717300 | 1.32023900   | -4.38801700 |
|    | H  | -7.18655700 | 0.21846800   | -3.00041700 |
|    | H  | -8.22923300 | -0.11137000  | -4.39311000 |
|    | H  | -5.74260100 | -2.75487100  | -3.48701400 |
|    | H  | -5.30529600 | -3.11939100  | -5.16473600 |
|    | H  | -7.00904500 | -2.93287900  | -4.71409500 |
|    | H  | -5.15299100 | -0.97820200  | -7.28387300 |
|    | H  | -5.87584400 | 0.61796800   | -7.01418600 |
|    | H  | -6.91224900 | -0.80952400  | -7.17009500 |
| 3f | N  | -0.03814500 | -0.90102400  | -0.22789800 |
|    | C  | -0.23998300 | -3.86275100  | -0.46101000 |
|    | H  | 0.27388700  | -3.61731400  | 0.47085300  |
|    | H  | 0.32782000  | -3.46207000  | -1.29896100 |
|    | H  | -1.25132700 | -3.45375300  | -0.46041600 |
|    | O  | -0.27167200 | -5.29915600  | -0.66593000 |
|    | S  | -1.23255800 | -6.17757900  | 0.27421100  |
|    | O  | -1.23167700 | -7.50333300  | -0.32527900 |
|    | O  | -2.50287100 | -5.47900800  | 0.44297000  |

|   |             |              |             |
|---|-------------|--------------|-------------|
| C | -0.35405900 | -6.23028400  | 1.84521400  |
| H | -0.24144400 | -5.17615000  | 2.13207200  |
| C | -1.23325100 | -6.96441900  | 2.87387300  |
| H | -0.55697300 | -7.38128300  | 3.62750400  |
| H | -1.70586500 | -7.82996800  | 2.38887600  |
| C | -2.27337300 | -6.08043500  | 3.55799600  |
| H | -1.78275300 | -5.26922500  | 4.10462600  |
| H | -2.85855700 | -6.66509400  | 4.27310600  |
| H | -2.96304900 | -5.63658800  | 2.83555100  |
| C | 1.02423500  | -6.87544400  | 1.64072300  |
| H | 1.45534600  | -6.54217300  | 0.68995500  |
| H | 0.88897800  | -7.96138200  | 1.57061400  |
| C | 1.98204900  | -6.51782500  | 2.77715100  |
| H | 2.15705800  | -5.43738100  | 2.80866500  |
| H | 2.94968500  | -7.00652800  | 2.63022700  |
| H | 1.59277400  | -6.82804100  | 3.75131000  |
| C | 1.12893500  | -0.25754400  | -0.06593700 |
| C | 1.28770100  | 1.12401000   | -0.11287000 |
| H | 2.27544400  | 1.54261400   | 0.02849600  |
| C | 0.15686700  | 1.94063700   | -0.31881700 |
| N | 0.24923200  | 3.29645100   | -0.35913800 |
| C | -1.07487300 | 1.27504000   | -0.48117700 |
| H | -1.99667100 | 1.81255600   | -0.66000400 |
| C | -1.10615800 | -0.11569300  | -0.43876400 |
| C | 1.55304000  | 3.93145500   | -0.31959400 |
| C | -0.95698700 | 4.09621600   | -0.46273200 |
| H | 1.42620200  | 5.00937700   | -0.40669600 |
| H | 2.18414900  | 3.59038700   | -1.14905800 |
| H | 2.07616000  | 3.71942200   | 0.62069400  |
| H | -1.48929400 | 3.90448100   | -1.40247500 |
| H | -0.68887300 | 5.15088500   | -0.42821100 |
| H | -1.64052000 | 3.88578800   | 0.36845800  |
| C | -1.46436100 | -14.18106200 | 1.52649500  |
| C | -2.50198900 | -13.26363400 | 1.63846200  |
| C | -2.22544800 | -11.88686600 | 1.64018000  |
| C | 0.13893600  | -12.37579600 | 1.40754200  |
| C | -0.14674400 | -13.74800200 | 1.41486200  |
| H | -1.68352900 | -15.24362100 | 1.52365000  |
| C | -3.28481600 | -10.93310300 | 1.76656900  |
| C | -4.18523800 | -10.12982400 | 1.87850100  |
| C | -7.63610100 | -8.80520200  | 2.34394900  |
| C | -7.40584300 | -7.43492200  | 2.35223000  |
| C | -6.10145300 | -6.94004900  | 2.19503900  |
| C | -5.27244200 | -9.21088400  | 2.02625300  |
| C | -6.57867800 | -9.69464900  | 2.18862900  |
| H | -8.64580100 | -9.18408800  | 2.46095000  |
| C | -5.86487600 | -5.52863500  | 2.22116300  |
| C | -5.69290600 | -4.32964000  | 2.25485400  |
| C | -6.49098200 | -0.69213700  | 2.30633600  |

|   |             |              |            |
|---|-------------|--------------|------------|
| C | -5.22487300 | -0.13376500  | 2.43224800 |
| C | -4.09306000 | -0.96241000  | 2.49728300 |
| C | -5.52324600 | -2.90943900  | 2.30812600 |
| C | -6.64698600 | -2.07221900  | 2.24760400 |
| H | -7.36231300 | -0.04791000  | 2.25352000 |
| C | 2.28562900  | -1.08174500  | 0.17041900 |
| C | 3.26259100  | -1.76744600  | 0.37738600 |
| C | 6.81705300  | -2.75845600  | 0.90692600 |
| C | 6.71883900  | -4.14403000  | 0.91163000 |
| C | 5.46657500  | -4.76124900  | 0.75928100 |
| C | 4.42591700  | -2.57778800  | 0.57671500 |
| C | 5.68009300  | -1.97222200  | 0.74613700 |
| H | 7.78731000  | -2.28716900  | 1.02653400 |
| C | 5.36780700  | -6.18829200  | 0.79897500 |
| C | 5.31629900  | -7.39797300  | 0.85320100 |
| C | 6.30809600  | -10.99193800 | 1.04978200 |
| C | 5.06558500  | -11.61121700 | 1.12552800 |
| C | 3.89556400  | -10.83719700 | 1.11142700 |
| C | 5.24050600  | -8.82500000  | 0.93809300 |
| C | 6.40435900  | -9.60721100  | 0.96022400 |
| H | 7.21045000  | -11.59404200 | 1.05822700 |
| C | 1.48255200  | -11.89632100 | 1.29626800 |
| C | 2.60105100  | -11.43922900 | 1.20662400 |
| C | -0.90513100 | -11.44928900 | 1.51602700 |
| C | -5.03899100 | -7.83096100  | 2.01815800 |
| C | -4.24528400 | -2.35063300  | 2.42523500 |
| C | 4.32360900  | -3.97431500  | 0.58314600 |
| C | 3.98972800  | -9.44606700  | 1.00783300 |
| H | -3.52955500 | -13.59975100 | 1.72700700 |
| H | 0.66433300  | -14.46239700 | 1.32318500 |
| H | -8.22536600 | -6.73638700  | 2.48235400 |
| H | -6.75240000 | -10.76533000 | 2.18374200 |
| H | -5.09780800 | 0.94229500   | 2.48407700 |
| H | -7.63241800 | -2.51395900  | 2.14602400 |
| H | 7.60197300  | -4.76043000  | 1.04133600 |
| H | 5.75074500  | -0.88922100  | 0.73433600 |
| H | 4.98975900  | -12.69069600 | 1.20047400 |
| H | 7.37295100  | -9.12322500  | 0.89565100 |
| H | -0.68846400 | -10.38623700 | 1.49492300 |
| H | -4.03569600 | -7.44788800  | 1.85851500 |
| H | -3.37230800 | -2.99554900  | 2.44893600 |
| H | 3.35566400  | -4.44562000  | 0.44451100 |
| H | 3.08598400  | -8.84647500  | 0.97260500 |
| C | 0.85242700  | 2.83995700   | 2.94825500 |
| C | -1.70516900 | 0.13874100   | 2.76614000 |
| C | -2.79282100 | -0.37955700  | 2.63566300 |
| C | 2.00712500  | 2.11133900   | 3.21467900 |
| C | 1.94310500  | 0.71573900   | 3.34880800 |
| C | -0.44170600 | 0.79508800   | 2.91534300 |

|    |             |              |             |
|----|-------------|--------------|-------------|
| C  | -0.36815400 | 2.19211800   | 2.80528000  |
| H  | 0.90312000  | 3.92041300   | 2.85733700  |
| C  | 0.71739200  | 0.06021700   | 3.18807200  |
| H  | 2.96071900  | 2.61383600   | 3.33861000  |
| H  | -1.27344700 | 2.75499400   | 2.60153500  |
| H  | 0.66473000  | -1.01950800  | 3.27984200  |
| C  | 3.11860200  | -0.02851100  | 3.70125500  |
| C  | 4.10859500  | -0.64543500  | 4.05269900  |
| Si | 5.56705500  | -1.57749000  | 4.71074200  |
| C  | 7.13391800  | -0.82069800  | 4.00601700  |
| C  | 5.36495800  | -3.38423200  | 4.25384600  |
| C  | 5.57024600  | -1.38517200  | 6.57998500  |
| H  | 7.27519500  | 0.19085600   | 4.39766600  |
| H  | 7.10445600  | -0.76475800  | 2.91590000  |
| H  | 8.00352700  | -1.41994700  | 4.29394900  |
| H  | 5.19590500  | -3.50819100  | 3.18144900  |
| H  | 4.51391100  | -3.81723200  | 4.78817900  |
| H  | 6.26135900  | -3.95000900  | 4.52691900  |
| H  | 4.65289100  | -1.78640600  | 7.01943900  |
| H  | 5.65865900  | -0.33428100  | 6.86914300  |
| H  | 6.41826000  | -1.92774600  | 7.01016900  |
| C  | 0.00267500  | -14.18913100 | -1.98815700 |
| C  | 1.17952300  | -13.45531000 | -2.07187200 |
| C  | 1.13831000  | -12.05271500 | -2.02219000 |
| C  | -1.27471000 | -12.14422100 | -1.79491700 |
| C  | -1.22244700 | -13.54408400 | -1.85374900 |
| H  | 0.03949300  | -15.27280000 | -2.02568000 |
| C  | 2.34653100  | -11.29032600 | -2.11646200 |
| C  | 3.36835900  | -10.64451900 | -2.20096000 |
| C  | 6.97847000  | -9.72444500  | -2.41315900 |
| C  | 6.90188000  | -8.33814300  | -2.47489400 |
| C  | 5.65046000  | -7.70255300  | -2.45496300 |
| C  | 4.56709900  | -9.86758700  | -2.29836400 |
| C  | 5.82184200  | -10.49235100 | -2.32582600 |
| H  | 7.94795600  | -10.21144800 | -2.42699000 |
| C  | 5.55983400  | -6.27500600  | -2.51925900 |
| C  | 5.47700000  | -5.06701500  | -2.56908500 |
| C  | 6.47815500  | -1.47679900  | -2.54816000 |
| C  | 5.25300600  | -0.85021000  | -2.73654000 |
| C  | 4.08327100  | -1.61539700  | -2.87650800 |
| C  | 5.39549300  | -3.63846900  | -2.62523800 |
| C  | 6.55727100  | -2.86421300  | -2.49418400 |
| H  | 7.37833200  | -0.88081700  | -2.43995000 |
| C  | -2.36410700 | -0.78900000  | -0.62878400 |
| C  | -3.43187800 | -1.34198100  | -0.77686500 |
| C  | -7.10120400 | -1.88757000  | -1.16481100 |
| C  | -7.17123800 | -3.27583800  | -1.17467100 |
| C  | -5.99762100 | -4.03833900  | -1.06486500 |
| C  | -4.69608300 | -1.99736200  | -0.92623400 |



|    |             |              |             |
|----|-------------|--------------|-------------|
| C  | -5.87312600 | -1.24385700  | -1.04473800 |
| H  | -8.01111600 | -1.30161400  | -1.24756400 |
| C  | -6.04604100 | -5.46864700  | -1.09345300 |
| C  | -6.06235500 | -6.67951400  | -1.13335000 |
| C  | -7.23597200 | -10.22202400 | -1.15512400 |
| C  | -6.03340000 | -10.90385800 | -1.29629800 |
| C  | -4.82715000 | -10.19072000 | -1.38328800 |
| C  | -6.05745200 | -8.11025300  | -1.18470500 |
| C  | -7.25661000 | -8.83197900  | -1.10239100 |
| H  | -8.16545200 | -10.77734200 | -1.08411100 |
| C  | -2.52864400 | -11.46844000 | -1.65122800 |
| C  | -3.58329600 | -10.88428000 | -1.52976900 |
| C  | -0.09027900 | -11.40178200 | -1.87666300 |
| C  | 4.48666200  | -8.47156100  | -2.36212700 |
| C  | 4.15815500  | -3.00958600  | -2.81337400 |
| C  | -4.76186100 | -3.39555800  | -0.93165900 |
| C  | -4.84272700 | -8.79411000  | -1.31796900 |
| H  | 2.13638800  | -13.95488400 | -2.17915900 |
| H  | -2.14275800 | -14.11402600 | -1.78410800 |
| H  | 7.80280900  | -7.73754800  | -2.54025100 |
| H  | 5.87944800  | -11.57400000 | -2.26751500 |
| H  | 5.18657900  | 0.23161800   | -2.78186700 |
| H  | 7.51078500  | -3.35823400  | -2.34152600 |
| H  | -8.12694500 | -3.77944200  | -1.27336200 |
| H  | -5.81406900 | -0.16019800  | -1.02684700 |
| H  | -6.01454500 | -11.98757500 | -1.34107500 |
| H  | -8.19364100 | -8.29728900  | -0.98887800 |
| H  | -0.12768900 | -10.31873600 | -1.81896300 |
| H  | 3.51781400  | -7.98418000  | -2.33166100 |
| H  | 3.25682100  | -3.60622000  | -2.90773300 |
| H  | -3.85813300 | -3.98630700  | -0.81576200 |
| H  | -3.90994200 | -8.24007800  | -1.35832200 |
| C  | -0.27498100 | 2.73175000   | -3.63686000 |
| C  | 1.80891400  | -0.32406800  | -3.25787800 |
| C  | 2.83246500  | -0.94876000  | -3.08143000 |
| C  | -1.53607000 | 2.18964800   | -3.86149000 |
| C  | -1.70777100 | 0.79716600   | -3.89876100 |
| C  | 0.65858900  | 0.50460200   | -3.46040100 |
| C  | 0.81954400  | 1.89912800   | -3.44416900 |
| H  | -0.14368000 | 3.80908000   | -3.61635500 |
| C  | -0.60835700 | -0.04360800  | -3.68855300 |
| H  | -2.39324600 | 2.83503100   | -4.02361700 |
| H  | 1.80829900  | 2.31406000   | -3.27608300 |
| H  | -0.73968500 | -1.12042600  | -3.70425300 |
| C  | -3.00128100 | 0.24956200   | -4.19503300 |
| C  | -4.09686000 | -0.19152300  | -4.49402400 |
| Si | -5.72398600 | -0.86253100  | -5.06931400 |
| C  | -7.10424700 | 0.16575200   | -4.32074000 |
| C  | -5.83361400 | -2.66496300  | -4.56706700 |

|  |   |             |             |             |
|--|---|-------------|-------------|-------------|
|  | C | -5.77437900 | -0.70452900 | -6.94168700 |
|  | H | -7.04213800 | 1.20298800  | -4.66253500 |
|  | H | -7.06703100 | 0.15995200  | -3.22903200 |
|  | H | -8.07466700 | -0.23546900 | -4.63025600 |
|  | H | -5.62954900 | -2.79090100 | -3.50015000 |
|  | H | -5.11131100 | -3.26436100 | -5.12978000 |
|  | H | -6.83484100 | -3.05727900 | -4.77209500 |
|  | H | -4.95876500 | -1.26384700 | -7.40850400 |
|  | H | -5.69546300 | 0.34128300  | -7.25249500 |
|  | H | -6.72025000 | -1.10135000 | -7.32435500 |
|  | N | 0.00324400  | -0.85838000 | -0.22879200 |
|  | C | 0.02952700  | -2.89104000 | -0.36617200 |
|  | H | 0.48190400  | -2.91397600 | 0.61383700  |
|  | H | 0.66623500  | -2.77639000 | -1.23146300 |
|  | H | -1.04525700 | -2.88821600 | -0.46627100 |
|  | O | 0.14791300  | -4.74822400 | -0.57351600 |
|  | S | -0.87445100 | -5.61513000 | 0.16532700  |
|  | O | -1.01723000 | -6.91464100 | -0.50588800 |
|  | O | -2.12622200 | -4.86362900 | 0.38127200  |
|  | C | -0.12556900 | -5.91941100 | 1.77768500  |
|  | H | 0.04808700  | -4.91421900 | 2.18638100  |
|  | C | -1.08721700 | -6.70180100 | 2.68368700  |
|  | H | -0.48037600 | -7.16463500 | 3.46977000  |
|  | H | -1.50771300 | -7.53132700 | 2.09963800  |
|  | C | -2.19599700 | -5.87424500 | 3.32937000  |
|  | H | -1.77003000 | -5.04934400 | 3.91043900  |
|  | H | -2.78859400 | -6.49286000 | 4.00982800  |
|  | H | -2.86546700 | -5.45178700 | 2.57765200  |
|  | C | 1.21382000  | -6.64754700 | 1.59399100  |
|  | H | 1.70899100  | -6.29643700 | 0.68208300  |
|  | H | 1.00300000  | -7.71451900 | 1.45037400  |
|  | C | 2.14388900  | -6.43474100 | 2.78726600  |
|  | H | 2.42360600  | -5.37923500 | 2.87273900  |
|  | H | 3.06497700  | -7.01255000 | 2.67136600  |
|  | H | 1.67330300  | -6.73552700 | 3.72794400  |
|  | C | 1.16927600  | -0.21058600 | -0.04288600 |
|  | C | 1.29212300  | 1.16947600  | -0.07485500 |
|  | H | 2.26956400  | 1.60481300  | 0.08257100  |
|  | C | 0.14204900  | 1.96546000  | -0.27820900 |
|  | N | 0.20955800  | 3.31642400  | -0.30875100 |
|  | C | -1.07993700 | 1.27872300  | -0.44903200 |
|  | H | -2.01098100 | 1.80097500  | -0.62228400 |
|  | C | -1.09518200 | -0.10915400 | -0.43482500 |
|  | C | 1.50358500  | 3.97676500  | -0.26650100 |
|  | C | -1.01093600 | 4.09884300  | -0.41339600 |
|  | H | 1.35580300  | 5.05152900  | -0.35325300 |
|  | H | 2.13919000  | 3.64669200  | -1.09612900 |
|  | H | 2.02614500  | 3.77329400  | 0.67524700  |
|  | H | -1.53087100 | 3.90667000  | -1.35922400 |

|   |             |              |             |
|---|-------------|--------------|-------------|
| H | -0.75920500 | 5.15663000   | -0.36610200 |
| H | -1.69430800 | 3.86819800   | 0.41144600  |
| C | -1.46821800 | -14.25152100 | 1.61918000  |
| C | -2.52637200 | -13.35469000 | 1.70448700  |
| C | -2.27936300 | -11.97275000 | 1.68300400  |
| C | 0.09732600  | -12.41469000 | 1.47781900  |
| C | -0.15949500 | -13.79231700 | 1.50873100  |
| H | -1.66449600 | -15.31838700 | 1.63547400  |
| C | -3.35661900 | -11.03553200 | 1.78205800  |
| C | -4.25864000 | -10.23093000 | 1.86741800  |
| C | -7.69512600 | -8.82271700  | 2.19503000  |
| C | -7.43061200 | -7.45902900  | 2.21447200  |
| C | -6.10824500 | -6.99741800  | 2.11486300  |
| C | -5.33138300 | -9.28953700  | 1.97724500  |
| C | -6.65531300 | -9.73928200  | 2.08143100  |
| H | -8.71855100 | -9.17531800  | 2.26767600  |
| C | -5.84328400 | -5.59116700  | 2.14654700  |
| C | -5.65623600 | -4.39463600  | 2.18724900  |
| C | -6.45082100 | -0.75832000  | 2.29334700  |
| C | -5.18424900 | -0.20183200  | 2.42216100  |
| C | -4.05252000 | -1.03190900  | 2.46627600  |
| C | -5.48192600 | -2.97541700  | 2.25358800  |
| C | -6.60616600 | -2.13744900  | 2.21428200  |
| H | -7.32284300 | -0.11405700  | 2.25634700  |
| C | 2.32626100  | -1.02427900  | 0.20414400  |
| C | 3.29398900  | -1.72732700  | 0.39281600  |
| C | 6.83048900  | -2.78703500  | 0.89320500  |
| C | 6.70213900  | -4.17006200  | 0.89475600  |
| C | 5.43666200  | -4.76360800  | 0.75229700  |
| C | 4.44327400  | -2.55868500  | 0.58458400  |
| C | 5.70891900  | -1.97670500  | 0.74515700  |
| H | 7.81137000  | -2.33687400  | 1.00599600  |
| C | 5.31657600  | -6.18899700  | 0.79703000  |
| C | 5.26227000  | -7.39794200  | 0.86463600  |
| C | 6.24908300  | -10.98952900 | 1.10534600  |
| C | 5.00641800  | -11.60661900 | 1.19179900  |
| C | 3.83640900  | -10.83236600 | 1.16987500  |
| C | 5.18210000  | -8.82380000  | 0.96716300  |
| C | 6.34563500  | -9.60621800  | 0.99650700  |
| H | 7.15119300  | -11.59194900 | 1.11942900  |
| C | 1.43239600  | -11.91146500 | 1.36459500  |
| C | 2.54428600  | -11.43893200 | 1.27191600  |
| C | -0.96672700 | -11.50904300 | 1.56315600  |
| C | -5.06199700 | -7.91522200  | 1.98717000  |
| C | -4.20280900 | -2.41875100  | 2.36846300  |
| C | 4.30856200  | -3.95289800  | 0.58705900  |
| C | 3.93040300  | -9.44261900  | 1.04833700  |
| H | -3.54702100 | -13.71157000 | 1.79153100  |
| H | 0.66736300  | -14.49065600 | 1.43649200  |

|    |             |              |             |
|----|-------------|--------------|-------------|
| H  | -8.23732300 | -6.73996700  | 2.30847200  |
| H  | -6.85706300 | -10.80493600 | 2.06316600  |
| H  | -5.05694100 | 0.87306200   | 2.49386300  |
| H  | -7.59220400 | -2.57827200  | 2.11420400  |
| H  | 7.57336000  | -4.80499600  | 1.01526700  |
| H  | 5.80063900  | -0.89533400  | 0.73644200  |
| H  | 4.92987100  | -12.68501800 | 1.28033300  |
| H  | 7.31430900  | -9.12368200  | 0.92282400  |
| H  | -0.77085200 | -10.44228300 | 1.53110600  |
| H  | -4.04138000 | -7.55984600  | 1.88322700  |
| H  | -3.32895600 | -3.06307100  | 2.36644800  |
| H  | 3.32792600  | -4.39973600  | 0.45083000  |
| H  | 3.02733200  | -8.84207000  | 1.00992900  |
| C  | 0.87363200  | 2.77919800   | 3.00177200  |
| C  | -1.66671000 | 0.06687600   | 2.76062800  |
| C  | -2.75254000 | -0.45179500  | 2.61701300  |
| C  | 2.03285400  | 2.05234900   | 3.25370100  |
| C  | 1.97738100  | 0.65396400   | 3.36045000  |
| C  | -0.40756400 | 0.72709300   | 2.92626600  |
| C  | -0.34296100 | 2.12678300   | 2.84516700  |
| H  | 0.91727400  | 3.86168700   | 2.93514500  |
| C  | 0.75589200  | -0.00615600  | 3.18559900  |
| H  | 2.98312300  | 2.55808500   | 3.38875800  |
| H  | -1.25219700 | 2.68782500   | 2.65415400  |
| H  | 0.70954700  | -1.08791300  | 3.25818300  |
| C  | 3.15613800  | -0.08870100  | 3.70460500  |
| C  | 4.14834800  | -0.70428700  | 4.05174800  |
| Si | 5.60557200  | -1.63523100  | 4.71515700  |
| C  | 7.17563600  | -0.87648300  | 4.02005000  |
| C  | 5.40250200  | -3.44075300  | 4.25412400  |
| C  | 5.59772100  | -1.44458600  | 6.58438200  |
| H  | 7.31426600  | 0.13405200   | 4.41525400  |
| H  | 7.15311700  | -0.81749700  | 2.92997100  |
| H  | 8.04361900  | -1.47620600  | 4.31183100  |
| H  | 5.22031200  | -3.56069800  | 3.18339000  |
| H  | 4.55774500  | -3.87633100  | 4.79646000  |
| H  | 6.30224300  | -4.00720900  | 4.51417000  |
| H  | 4.67721600  | -1.84552800  | 7.01750400  |
| H  | 5.68521100  | -0.39400600  | 6.87499200  |
| H  | 6.44252200  | -1.98837200  | 7.01932900  |
| C  | -0.01208500 | -14.30356900 | -1.87367800 |
| C  | 1.16623900  | -13.57321200 | -1.96902500 |
| C  | 1.12579000  | -12.17000500 | -1.95558700 |
| C  | -1.28927600 | -12.25405100 | -1.74228300 |
| C  | -1.23775700 | -13.65488200 | -1.76328700 |
| H  | 0.02410300  | -15.38784200 | -1.88231500 |
| C  | 2.33239400  | -11.40631900 | -2.05933600 |
| C  | 3.34728900  | -10.75044000 | -2.14949300 |
| C  | 6.94563600  | -9.78465700  | -2.36650400 |

|   |             |              |             |
|---|-------------|--------------|-------------|
| C | 6.85045100  | -8.40038400  | -2.44288700 |
| C | 5.59046100  | -7.78154600  | -2.43177700 |
| C | 4.53587500  | -9.95883700  | -2.25344700 |
| C | 5.79909600  | -10.56671300 | -2.27242700 |
| H | 7.92158500  | -10.25867400 | -2.37371800 |
| C | 5.48196000  | -6.35599600  | -2.50877700 |
| C | 5.38641500  | -5.14940500  | -2.56635700 |
| C | 6.36245000  | -1.55264900  | -2.58386100 |
| C | 5.13072000  | -0.93570900  | -2.75861300 |
| C | 3.96444400  | -1.71040500  | -2.87448600 |
| C | 5.29302600  | -3.72232200  | -2.63156900 |
| C | 6.45103600  | -2.93920000  | -2.52182800 |
| H | 7.26015700  | -0.95017700  | -2.49291200 |
| C | -2.33528900 | -0.80017400  | -0.65015500 |
| C | -3.39746600 | -1.36034700  | -0.81048300 |
| C | -7.06177700 | -1.93261900  | -1.18327000 |
| C | -7.11849600 | -3.32127900  | -1.20640800 |
| C | -5.93767800 | -4.07595400  | -1.11852500 |
| C | -4.65596300 | -2.02561900  | -0.96988700 |
| C | -5.83836200 | -1.27866600  | -1.07181700 |
| H | -7.97834500 | -1.35513500  | -1.24856400 |
| C | -5.98199300 | -5.50656400  | -1.16233100 |
| C | -6.00446300 | -6.71721200  | -1.20895300 |
| C | -7.23897000 | -10.23736700 | -1.27256800 |
| C | -6.04576200 | -10.94218800 | -1.37299300 |
| C | -4.82420800 | -10.25241900 | -1.42331500 |
| C | -6.01991200 | -8.14807000  | -1.26392300 |
| C | -7.23437400 | -8.84732200  | -1.22087700 |
| H | -8.18057500 | -10.77475800 | -1.23115000 |
| C | -2.54179600 | -11.56986100 | -1.62854900 |
| C | -3.59001500 | -10.96953500 | -1.53344600 |
| C | -0.10354400 | -11.51533800 | -1.83583000 |
| C | 4.43673600  | -8.56481400  | -2.33327700 |
| C | 4.04803100  | -3.10342000  | -2.80321000 |
| C | -4.70555500 | -3.42485900  | -0.98835500 |
| C | -4.81530300 | -8.85538000  | -1.36095400 |
| H | 2.12310300  | -14.07654000 | -2.05726700 |
| H | -2.15863100 | -14.22260800 | -1.68354200 |
| H | 7.74328100  | -7.78825200  | -2.51242100 |
| H | 5.87112500  | -11.64679500 | -2.20213000 |
| H | 5.05546900  | 0.14522600   | -2.80991600 |
| H | 7.40993900  | -3.42598700  | -2.38018000 |
| H | -8.07114600 | -3.83192200  | -1.29904100 |
| H | -5.78816600 | -0.19475700  | -1.04439400 |
| H | -6.04606100 | -12.02611100 | -1.41526400 |
| H | -8.16401000 | -8.29452000  | -1.13788600 |
| H | -0.13983600 | -10.43118900 | -1.81048300 |
| H | 3.46139800  | -8.09020700  | -2.30906300 |
| H | 3.14920200  | -3.70683900  | -2.87746500 |

|    |    |             |             |             |
|----|----|-------------|-------------|-------------|
|    | H  | -3.79173600 | -4.00076700 | -0.87287700 |
|    | H  | -3.87229100 | -8.31835100 | -1.37731800 |
|    | C  | -0.35954000 | 2.66741000  | -3.58210900 |
|    | C  | 1.68848900  | -0.41528000 | -3.22851100 |
|    | C  | 2.70837900  | -1.04907500 | -3.06244400 |
|    | C  | -1.62886200 | 2.14124300  | -3.79851500 |
|    | C  | -1.81757100 | 0.75101600  | -3.84086000 |
|    | C  | 0.54798700  | 0.42870400  | -3.42118700 |
|    | C  | 0.72656000  | 1.82116500  | -3.39967500 |
|    | H  | -0.21486800 | 3.74304100  | -3.56112200 |
|    | C  | -0.72664200 | -0.10369000 | -3.64399800 |
|    | H  | -2.47914400 | 2.79756800  | -3.95230300 |
|    | H  | 1.72142300  | 2.22363300  | -3.23704000 |
|    | H  | -0.87019500 | -1.17905100 | -3.66609900 |
|    | C  | -3.11707700 | 0.21878100  | -4.13638200 |
|    | C  | -4.21760600 | -0.20617000 | -4.43956800 |
|    | Si | -5.84621500 | -0.84964900 | -5.04112200 |
|    | C  | -7.22451600 | 0.15042700  | -4.25224100 |
|    | C  | -5.94599600 | -2.67229900 | -4.61841400 |
|    | C  | -5.89785200 | -0.60935100 | -6.90419500 |
|    | H  | -7.16637700 | 1.19660500  | -4.56628400 |
|    | H  | -7.17932500 | 0.11587700  | -3.16180600 |
|    | H  | -8.19635800 | -0.24386300 | -4.56614000 |
|    | H  | -5.70708300 | -2.84634200 | -3.56627000 |
|    | H  | -5.24112100 | -3.24336400 | -5.22971100 |
|    | H  | -6.95254800 | -3.05753400 | -4.80953300 |
|    | H  | -5.08342300 | -1.14806400 | -7.39610300 |
|    | H  | -5.81844300 | 0.44889100  | -7.16816200 |
|    | H  | -6.84468800 | -0.98791900 | -7.30257400 |
| 4f | N  | 0.00812100  | -0.82940800 | -0.21582800 |
|    | C  | -0.01560800 | -2.30526200 | -0.22882900 |
|    | H  | 0.49005600  | -2.67662200 | 0.66289800  |
|    | H  | 0.51062800  | -2.66651500 | -1.11434600 |
|    | H  | -1.04182100 | -2.66493400 | -0.23433500 |
|    | O  | 0.07258800  | -5.15368600 | -0.64439900 |
|    | S  | -0.97654500 | -5.80384200 | 0.18054300  |
|    | O  | -1.34032200 | -7.16292500 | -0.30092900 |
|    | O  | -2.16003300 | -4.92077300 | 0.38575800  |
|    | C  | -0.22018100 | -6.03679200 | 1.81186100  |
|    | H  | -0.00675600 | -5.01255300 | 2.15018500  |
|    | C  | -1.18038600 | -6.72669900 | 2.78906900  |
|    | H  | -0.58109600 | -7.12546800 | 3.61656600  |
|    | H  | -1.61019900 | -7.59815100 | 2.27662500  |
|    | C  | -2.28461500 | -5.83723600 | 3.35682700  |
|    | H  | -1.85406000 | -4.97857500 | 3.88490500  |
|    | H  | -2.90190400 | -6.39368400 | 4.06983900  |
|    | H  | -2.92846800 | -5.45689900 | 2.56130400  |
|    | C  | 1.09854900  | -6.81016300 | 1.66935900  |
|    | H  | 1.59231700  | -6.52066500 | 0.73499100  |

|   |             |              |             |
|---|-------------|--------------|-------------|
| H | 0.86440900  | -7.88061000  | 1.58997200  |
| C | 2.04753300  | -6.55432100  | 2.84011700  |
| H | 2.34257000  | -5.49942800  | 2.87199200  |
| H | 2.96108700  | -7.14841900  | 2.74392700  |
| H | 1.58634500  | -6.80202400  | 3.80127500  |
| C | 1.20369400  | -0.18616700  | -0.03803300 |
| C | 1.30373700  | 1.18497800   | -0.08198000 |
| H | 2.28162200  | 1.61994100   | 0.06827500  |
| C | 0.14791400  | 1.98316300   | -0.27850000 |
| N | 0.21403100  | 3.32222600   | -0.30807000 |
| C | -1.07829300 | 1.29295900   | -0.44206800 |
| H | -2.00860500 | 1.81502000   | -0.61467900 |
| C | -1.11866700 | -0.08496900  | -0.42908600 |
| C | 1.50916500  | 3.98974000   | -0.26082600 |
| C | -1.00890700 | 4.10943400   | -0.40794600 |
| H | 1.35492100  | 5.06321600   | -0.34166700 |
| H | 2.14224800  | 3.66523300   | -1.09287200 |
| H | 2.02593500  | 3.78101100   | 0.68166300  |
| H | -1.52605000 | 3.91642500   | -1.35377200 |
| H | -0.75338800 | 5.16547600   | -0.36002400 |
| H | -1.68600200 | 3.87643700   | 0.41980300  |
| C | -1.46227600 | -14.23480400 | 1.61465400  |
| C | -2.51951600 | -13.33632200 | 1.69385600  |
| C | -2.27093300 | -11.95487300 | 1.66416300  |
| C | 0.10511300  | -12.40022000 | 1.46569500  |
| C | -0.15289400 | -13.77738200 | 1.50475900  |
| H | -1.65966300 | -15.30136900 | 1.63648400  |
| C | -3.34612000 | -11.01541900 | 1.76058600  |
| C | -4.24633000 | -10.20903900 | 1.84666900  |
| C | -7.68643800 | -8.81998000  | 2.20236900  |
| C | -7.42983800 | -7.45484000  | 2.22143300  |
| C | -6.11143800 | -6.98556500  | 2.10765600  |
| C | -5.32130100 | -9.27110900  | 1.96128300  |
| C | -6.64144400 | -9.72913000  | 2.07882900  |
| H | -8.70674500 | -9.17940000  | 2.28496500  |
| C | -5.85352400 | -5.57856500  | 2.14140500  |
| C | -5.66282300 | -4.38285200  | 2.18073500  |
| C | -6.40808800 | -0.73456900  | 2.26954300  |
| C | -5.13369700 | -0.19652500  | 2.39894700  |
| C | -4.01482400 | -1.04390200  | 2.44841400  |
| C | -5.47197100 | -2.96604200  | 2.24099500  |
| C | -6.58356600 | -2.11187100  | 2.19669500  |
| H | -7.27038800 | -0.07759500  | 2.22806000  |
| C | 2.35062200  | -0.99408100  | 0.20675600  |
| C | 3.31594500  | -1.70145300  | 0.39132200  |
| C | 6.84659800  | -2.77440800  | 0.86927200  |
| C | 6.70928600  | -4.15657800  | 0.87313600  |
| C | 5.43990700  | -4.74556100  | 0.74285300  |
| C | 4.46048600  | -2.53719500  | 0.58022300  |

|    |             |              |            |
|----|-------------|--------------|------------|
| C  | 5.72854200  | -1.95795900  | 0.73025000 |
| H  | 7.83107900  | -2.33030000  | 0.97290700 |
| C  | 5.31506400  | -6.16997800  | 0.79199100 |
| C  | 5.26017100  | -7.37838600  | 0.86526000 |
| C  | 6.25714000  | -10.96538200 | 1.12019300 |
| C  | 5.01604200  | -11.58653600 | 1.19996400 |
| C  | 3.84355500  | -10.81652300 | 1.16749900 |
| C  | 5.18283200  | -8.80416700  | 0.96945500 |
| C  | 6.34921800  | -9.58195800  | 1.00937100 |
| H  | 7.16131700  | -11.56446400 | 1.14198100 |
| C  | 1.44085200  | -11.89863800 | 1.35601500 |
| C  | 2.55276400  | -11.42580000 | 1.26610200 |
| C  | -0.95817900 | -11.49289700 | 1.54127700 |
| C  | -5.05946900 | -7.89523200  | 1.96527200 |
| C  | -4.18416100 | -2.42855800  | 2.35352100 |
| C  | 4.31442700  | -3.93041000  | 0.58532700 |
| C  | 3.93263500  | -9.42696500  | 1.04106300 |
| H  | -3.54062400 | -13.69153200 | 1.78243900 |
| H  | 0.67365500  | -14.47675400 | 1.43916800 |
| H  | -8.23950800 | -6.74053600  | 2.32588000 |
| H  | -6.83597100 | -10.79620500 | 2.06388900 |
| H  | -4.99029800 | 0.87656900   | 2.46731200 |
| H  | -7.57589900 | -2.53868300  | 2.09756700 |
| H  | 7.57822800  | -4.79594500  | 0.98650700 |
| H  | 5.82460500  | -0.87709500  | 0.71958800 |
| H  | 4.94266300  | -12.66488600 | 1.29171200 |
| H  | 7.31655500  | -9.09573900  | 0.94222200 |
| H  | -0.76331200 | -10.42638300 | 1.49630600 |
| H  | -4.04293200 | -7.53205200  | 1.84047000 |
| H  | -3.32064200 | -3.08709000  | 2.35074500 |
| H  | 3.33055500  | -4.37225500  | 0.45760000 |
| H  | 3.02704200  | -8.83081800  | 0.99095200 |
| C  | 0.91675700  | 2.74557500   | 2.99987900 |
| C  | -1.61934200 | 0.03119300   | 2.75006700 |
| C  | -2.70786900 | -0.48040600  | 2.60096400 |
| C  | 2.07928100  | 2.01941400   | 3.23974700 |
| C  | 2.02656300  | 0.62061500   | 3.34302400 |
| C  | -0.36107900 | 0.69114900   | 2.92165400 |
| C  | -0.29980700 | 2.09172100   | 2.84673900 |
| H  | 0.95736300  | 3.82875800   | 2.94257100 |
| C  | 0.80469700  | -0.04117400  | 3.17495500 |
| H  | 3.02940700  | 2.52627300   | 3.37092300 |
| H  | -1.21198700 | 2.65195400   | 2.66717000 |
| H  | 0.75998400  | -1.12289000  | 3.25072800 |
| C  | 3.20787400  | -0.12066600  | 3.68006500 |
| C  | 4.20194900  | -0.73408400  | 4.02509700 |
| Si | 5.65946700  | -1.66148100  | 4.69502100 |
| C  | 7.22941900  | -0.90484800  | 3.99780600 |
| C  | 5.45222200  | -3.46807500  | 4.24182500 |



|   |             |              |             |
|---|-------------|--------------|-------------|
| C | 5.64794600  | -1.45981900  | 6.56265600  |
| H | 7.36767400  | 0.10653500   | 4.39092400  |
| H | 7.20786900  | -0.84786500  | 2.90772000  |
| H | 8.09732400  | -1.50373000  | 4.29138600  |
| H | 5.26393800  | -3.59118200  | 3.17272500  |
| H | 4.60896600  | -3.90006200  | 4.78927100  |
| H | 6.35203700  | -4.03550300  | 4.49918900  |
| H | 4.72661100  | -1.85816800  | 6.99623500  |
| H | 5.73529200  | -0.40763400  | 6.84729100  |
| H | 6.49185100  | -2.00134800  | 7.00201100  |
| C | 0.01211500  | -14.27652600 | -1.88627600 |
| C | 1.18748200  | -13.54125500 | -1.97969500 |
| C | 1.14155800  | -12.13820900 | -1.96360300 |
| C | -1.27301900 | -12.23221300 | -1.75271000 |
| C | -1.21616700 | -13.63271400 | -1.77619000 |
| H | 0.05268800  | -15.36064200 | -1.89621900 |
| C | 2.34587600  | -11.37058000 | -2.06430200 |
| C | 3.35937400  | -10.71225200 | -2.15184500 |
| C | 6.95702500  | -9.74028500  | -2.35076900 |
| C | 6.85975300  | -8.35646500  | -2.43254300 |
| C | 5.59846000  | -7.74023800  | -2.43163600 |
| C | 4.54675400  | -9.91859300  | -2.25285400 |
| C | 5.81126900  | -10.52406500 | -2.26138800 |
| H | 7.93387900  | -10.21250900 | -2.34993600 |
| C | 5.48750800  | -6.31509500  | -2.51223500 |
| C | 5.38876700  | -5.10890700  | -2.57193100 |
| C | 6.35564100  | -1.50904800  | -2.59852100 |
| C | 5.12148700  | -0.89530200  | -2.76744700 |
| C | 3.95741500  | -1.67408600  | -2.87822200 |
| C | 5.29147200  | -3.68229900  | -2.63972400 |
| C | 6.44774000  | -2.89546600  | -2.53639400 |
| H | 7.25235600  | -0.90446600  | -2.51243200 |
| C | -2.35021500 | -0.76622000  | -0.64718300 |
| C | -3.40873900 | -1.32969100  | -0.81767300 |
| C | -7.06372600 | -1.92067100  | -1.21041600 |
| C | -7.10855300 | -3.31002600  | -1.22316000 |
| C | -5.92429800 | -4.05804900  | -1.12018600 |
| C | -4.66217200 | -1.99898700  | -0.98087900 |
| C | -5.84594300 | -1.25694800  | -1.09870200 |
| H | -7.98452200 | -1.35156800  | -1.28659000 |
| C | -5.96339500 | -5.48850400  | -1.16245400 |
| C | -5.98356500 | -6.69910100  | -1.20637300 |
| C | -7.22475100 | -10.21548300 | -1.29063500 |
| C | -6.03247300 | -10.92195100 | -1.39119700 |
| C | -4.80936200 | -10.23441900 | -1.43117500 |
| C | -6.00062800 | -8.12960000  | -1.26532900 |
| C | -7.21711100 | -8.82580500  | -1.23171100 |
| H | -8.16764800 | -10.75111100 | -1.25626500 |
| C | -2.52759400 | -11.55240500 | -1.63750200 |

|    |    |             |              |             |
|----|----|-------------|--------------|-------------|
|    | C  | -3.57611100 | -10.95292100 | -1.54130300 |
|    | C  | -0.09019000 | -11.48827200 | -1.84296800 |
|    | C  | 4.44540300  | -8.52506300  | -2.33805200 |
|    | C  | 4.04406100  | -3.06688900  | -2.80616200 |
|    | C  | -4.69734100 | -3.39934100  | -0.98187000 |
|    | C  | -4.79636000 | -8.83778600  | -1.35812600 |
|    | H  | 2.14644800  | -14.04060200 | -2.06790200 |
|    | H  | -2.13493300 | -14.20407200 | -1.69800200 |
|    | H  | 7.75181700  | -7.74279100  | -2.49821200 |
|    | H  | 5.88484900  | -11.60374200 | -2.18653700 |
|    | H  | 5.04283800  | 0.18533100   | -2.81944500 |
|    | H  | 7.40871900  | -3.37955400  | -2.39941300 |
|    | H  | -8.05696600 | -3.82779700  | -1.31996900 |
|    | H  | -5.80141300 | -0.17264000  | -1.08296200 |
|    | H  | -6.03486800 | -12.00559700 | -1.44094700 |
|    | H  | -8.14582400 | -8.27108700  | -1.15100000 |
|    | H  | -0.13119400 | -10.40435600 | -1.81188200 |
|    | H  | 3.46916300  | -8.05198300  | -2.32091100 |
|    | H  | 3.14620000  | -3.67215200  | -2.87575300 |
|    | H  | -3.78013200 | -3.96760000  | -0.84321200 |
|    | H  | -3.85126800 | -8.30343600  | -1.35707800 |
|    | C  | -0.40386700 | 2.67240800   | -3.57693600 |
|    | C  | 1.67444100  | -0.39058300  | -3.22856700 |
|    | C  | 2.69871800  | -1.01754100  | -3.06412000 |
|    | C  | -1.66942700 | 2.13387000   | -3.78683900 |
|    | C  | -1.84452600 | 0.74178000   | -3.83095500 |
|    | C  | 0.52590600  | 0.44249800   | -3.41966600 |
|    | C  | 0.69163000  | 1.83682400   | -3.39925200 |
|    | H  | -0.26880700 | 3.74945700   | -3.56110200 |
|    | C  | -0.74442400 | -0.10262400  | -3.63913300 |
|    | H  | -2.52646100 | 2.78196400   | -3.93775800 |
|    | H  | 1.68424400  | 2.24859200   | -3.24600700 |
|    | H  | -0.87660900 | -1.17942800  | -3.66728000 |
|    | C  | -3.13823600 | 0.19785700   | -4.12943000 |
|    | C  | -4.23360800 | -0.23433100  | -4.44050800 |
|    | Si | -5.85084500 | -0.88857400  | -5.06379700 |
|    | C  | -7.24478600 | 0.10837600   | -4.29887300 |
|    | C  | -5.94329200 | -2.71073700  | -4.63842000 |
|    | C  | -5.87515500 | -0.65198100  | -6.92768300 |
|    | H  | -7.18733200 | 1.15276800   | -4.61878800 |
|    | H  | -7.21545800 | 0.08147600   | -3.20779100 |
|    | H  | -8.21006500 | -0.29260300  | -4.62426500 |
|    | H  | -5.70984000 | -2.88266300  | -3.58481400 |
|    | H  | -5.23048500 | -3.27796200  | -5.24405100 |
|    | H  | -6.94605600 | -3.10253500  | -4.83591000 |
|    | H  | -5.05113600 | -1.18803000  | -7.40639500 |
|    | H  | -5.79691800 | 0.40609900   | -7.19250700 |
|    | H  | -6.81440000 | -1.03578500  | -7.33891200 |
| 3g | N  | 0.03231200  | -0.96693200  | -0.28875700 |

|   |             |              |             |
|---|-------------|--------------|-------------|
| C | -0.22658700 | -3.95149300  | -0.23141300 |
| H | 0.32999100  | -3.65210100  | 0.66076300  |
| H | 0.32209000  | -3.64214300  | -1.11838400 |
| H | -1.22379700 | -3.50639300  | -0.23295600 |
| O | -0.30937500 | -5.39848600  | -0.31321600 |
| S | -1.34295200 | -6.15006000  | 0.65564700  |
| O | -1.32076500 | -7.53886700  | 0.22047300  |
| O | -2.61311300 | -5.43013500  | 0.64278800  |
| C | -0.58218600 | -6.02006600  | 2.28270200  |
| H | -0.52873500 | -4.93978800  | 2.47329000  |
| C | -1.51069000 | -6.68982800  | 3.30953500  |
| H | -0.88957300 | -6.95566600  | 4.17273700  |
| H | -1.87050500 | -7.64439200  | 2.89758100  |
| C | -2.68183700 | -5.82941300  | 3.78431100  |
| H | -2.28602700 | -4.89660900  | 4.20702200  |
| C | -3.52645500 | -6.55354700  | 4.82841200  |
| H | -3.30954800 | -5.54586700  | 2.93353500  |
| H | -3.90692400 | -7.50059700  | 4.43022400  |
| H | -4.38719200 | -5.94728900  | 5.12440200  |
| H | -2.94080400 | -6.77781800  | 5.72595500  |
| C | 0.82534600  | -6.62858600  | 2.24568600  |
| H | 1.32203500  | -6.37907800  | 1.30085200  |
| H | 0.73517600  | -7.72139700  | 2.28295500  |
| C | 1.69358100  | -6.12740600  | 3.40191900  |
| H | 1.80521200  | -5.03880800  | 3.31699400  |
| C | 3.06885100  | -6.78887400  | 3.39918800  |
| H | 1.19493200  | -6.31761500  | 4.35919200  |
| H | 2.97802100  | -7.87803500  | 3.47132400  |
| H | 3.67589400  | -6.44632700  | 4.24132200  |
| H | 3.61393400  | -6.55833100  | 2.47737900  |
| C | 1.19779700  | -0.32495300  | -0.11081900 |
| C | 1.35283600  | 1.05806900   | -0.12277100 |
| H | 2.33946800  | 1.47569100   | 0.02920800  |
| C | 0.21982000  | 1.87722600   | -0.30438300 |
| N | 0.30953100  | 3.23392200   | -0.30691700 |
| C | -1.01059000 | 1.21293500   | -0.48117200 |
| H | -1.93477400 | 1.75266100   | -0.64076800 |
| C | -1.03783400 | -0.17861000  | -0.47792100 |
| C | 1.61212400  | 3.86997300   | -0.24613700 |
| C | -0.89920200 | 4.03391000   | -0.37215300 |
| H | 1.48408200  | 4.94919800   | -0.31322600 |
| H | 2.24791700  | 3.54571100   | -1.07858200 |
| H | 2.13059200  | 3.64042600   | 0.69290100  |
| H | -1.44045100 | 3.87005600   | -1.31185300 |
| H | -0.63279900 | 5.08763600   | -0.30733400 |
| H | -1.57338000 | 3.79567700   | 0.45933500  |
| C | -1.29541700 | -14.03086500 | 1.71417500  |
| C | -2.34583100 | -13.12374100 | 1.77359400  |
| C | -2.09286300 | -11.74641500 | 1.66802400  |

|   |             |              |            |
|---|-------------|--------------|------------|
| C | 0.27418900  | -12.21253900 | 1.43553600 |
| C | 0.01178300  | -13.58471100 | 1.54922400 |
| H | -1.49593100 | -15.09408000 | 1.79427300 |
| C | -3.17380200 | -10.81184900 | 1.74428500 |
| C | -4.10569400 | -10.04092900 | 1.81991700 |
| C | -7.61866300 | -8.87800100  | 2.24866100 |
| C | -7.45509600 | -7.49768800  | 2.24147200 |
| C | -6.17635400 | -6.94298900  | 2.07626200 |
| C | -5.23673300 | -9.17197200  | 1.93823100 |
| C | -6.51896400 | -9.71673100  | 2.10657600 |
| H | -8.60891100 | -9.30393400  | 2.37158600 |
| C | -5.99210500 | -5.52452000  | 2.09884800 |
| C | -5.82069800 | -4.32579500  | 2.13767300 |
| C | -6.50619400 | -0.66367800  | 2.21816900 |
| C | -5.22181800 | -0.15000500  | 2.35015600 |
| C | -4.11804600 | -1.01651500  | 2.40857900 |
| C | -5.61343900 | -2.91140700  | 2.19755100 |
| C | -6.70875100 | -2.03729900  | 2.14792200 |
| H | -7.35493300 | 0.01040400   | 2.17164000 |
| C | 2.35934000  | -1.14695200  | 0.11135000 |
| C | 3.35832500  | -1.81292500  | 0.27337700 |
| C | 6.95341800  | -2.68466100  | 0.73029000 |
| C | 6.90875000  | -4.07301400  | 0.70068400 |
| C | 5.67956800  | -4.73267900  | 0.54579800 |
| C | 4.55209500  | -2.58756800  | 0.43299300 |
| C | 5.78524000  | -1.93953600  | 0.60339400 |
| H | 7.90600600  | -2.17895400  | 0.85092700 |
| C | 5.62420800  | -6.16212200  | 0.56156100 |
| C | 5.57087300  | -7.37152000  | 0.61410500 |
| C | 6.44362400  | -10.99984000 | 0.76306900 |
| C | 5.18490100  | -11.57054500 | 0.91335000 |
| C | 4.04593900  | -10.75222900 | 0.96582700 |
| C | 5.45468000  | -8.79470500  | 0.70638100 |
| C | 6.58699900  | -9.61969800  | 0.66261500 |
| H | 7.32151800  | -11.63585700 | 0.72240900 |
| C | 1.61330200  | -11.73699000 | 1.26838700 |
| C | 2.73815000  | -11.30871300 | 1.13032900 |
| C | -0.78246900 | -11.29523700 | 1.49121100 |
| C | -5.07152600 | -7.78320100  | 1.90438100 |
| C | -4.31656000 | -2.39782300  | 2.31926100 |
| C | 4.50373000  | -3.98647700  | 0.40422300 |
| C | 4.18613000  | -9.36622600  | 0.85396100 |
| H | -3.36629400 | -13.46769000 | 1.90439600 |
| H | 0.83469600  | -14.28954200 | 1.49734300 |
| H | -8.30759000 | -6.83855600  | 2.36682000 |
| H | -6.63989700 | -10.79462600 | 2.11963900 |
| H | -5.05883300 | 0.92058900   | 2.41396200 |
| H | -7.70850000 | -2.44553900  | 2.04573100 |
| H | 7.81644400  | -4.65766600  | 0.80500500 |

|    |             |              |             |
|----|-------------|--------------|-------------|
| H  | 5.81506100  | -0.85479600  | 0.62213600  |
| H  | 5.07203200  | -12.64632800 | 0.99479000  |
| H  | 7.56779300  | -9.17278300  | 0.54117600  |
| H  | -0.58674300 | -10.23256700 | 1.38716600  |
| H  | -4.08823500 | -7.35190900  | 1.73665800  |
| H  | -3.46835900 | -3.07590700  | 2.33336300  |
| H  | 3.55302000  | -4.49289200  | 0.26815200  |
| H  | 3.30689700  | -8.73048500  | 0.87768300  |
| C  | 0.87116200  | 2.69357700   | 2.97336600  |
| C  | -1.70414300 | 0.01760000   | 2.71184700  |
| C  | -2.80134500 | -0.47557400  | 2.56369100  |
| C  | 2.02139100  | 1.95126600   | 3.22027800  |
| C  | 1.94956000  | 0.55284500   | 3.31358800  |
| C  | -0.43421400 | 0.65707300   | 2.88029400  |
| C  | -0.35240000 | 2.05640800   | 2.81111400  |
| H  | 0.92752700  | 3.77587600   | 2.91270800  |
| C  | 0.72058500  | -0.09176900  | 3.13213800  |
| H  | 2.97763500  | 2.44458000   | 3.35954600  |
| H  | -1.25468600 | 2.62951100   | 2.62288900  |
| H  | 0.66238400  | -1.17357200  | 3.19271600  |
| C  | 3.12083000  | -0.20544000  | 3.64976900  |
| C  | 4.10847700  | -0.83275900  | 3.98913400  |
| Si | 5.55001300  | -1.79017900  | 4.64766600  |
| C  | 7.13757900  | -0.99810900  | 4.03768900  |
| C  | 5.37139200  | -3.56945600  | 4.08581700  |
| C  | 5.48265100  | -1.70122600  | 6.52321800  |
| H  | 7.24476100  | 0.01056600   | 4.44670400  |
| H  | 7.16179000  | -0.93194000  | 2.94780800  |
| H  | 7.99982100  | -1.58912700  | 4.36243700  |
| H  | 5.28069800  | -3.63678600  | 2.99859400  |
| H  | 4.47708300  | -4.01483500  | 4.53267800  |
| H  | 6.23848300  | -4.16140500  | 4.39556000  |
| H  | 4.55137600  | -2.12872500  | 6.90487000  |
| H  | 5.55487100  | -0.66822400  | 6.87444100  |
| H  | 6.31637500  | -2.26502600  | 6.95396600  |
| C  | 0.09293200  | -14.26565200 | -1.80712000 |
| C  | 1.25446900  | -13.52015900 | -1.96738800 |
| C  | 1.18817000  | -12.11873300 | -2.02088900 |
| C  | -1.21971800 | -12.23516200 | -1.74489200 |
| C  | -1.14190300 | -13.63402600 | -1.69806000 |
| H  | 0.14951400  | -15.34817400 | -1.76216900 |
| C  | 2.37981100  | -11.34211400 | -2.18663300 |
| C  | 3.38405500  | -10.67844800 | -2.32612400 |
| C  | 6.96349400  | -9.71194800  | -2.74641400 |
| C  | 6.86633400  | -8.32683100  | -2.79932800 |
| C  | 5.61054300  | -7.70606500  | -2.70272000 |
| C  | 4.56461200  | -9.88461900  | -2.48982700 |
| C  | 5.82332200  | -10.49389800 | -2.59296600 |
| H  | 7.93627800  | -10.18667400 | -2.82019800 |

|   |             |              |             |
|---|-------------|--------------|-------------|
| C | 5.50606800  | -6.27865700  | -2.75197500 |
| C | 5.42765400  | -5.06984900  | -2.78678900 |
| C | 6.47348400  | -1.49436700  | -2.69850100 |
| C | 5.25525400  | -0.84745000  | -2.86144000 |
| C | 4.07456300  | -1.59425600  | -3.00619000 |
| C | 5.36184800  | -3.63948900  | -2.81603700 |
| C | 6.53474800  | -2.88343800  | -2.67633700 |
| H | 7.38239400  | -0.91319000  | -2.58289400 |
| C | -2.29423500 | -0.84885200  | -0.68887200 |
| C | -3.36426600 | -1.39294700  | -0.85297400 |
| C | -7.02902600 | -1.95766900  | -1.26096000 |
| C | -7.08913000 | -3.34606900  | -1.28887200 |
| C | -5.91009400 | -4.10175900  | -1.18732200 |
| C | -4.62406400 | -2.05248200  | -1.02126100 |
| C | -5.80585700 | -1.30597500  | -1.13157500 |
| H | -7.94355200 | -1.37784100  | -1.33570000 |
| C | -5.95215000 | -5.53241400  | -1.22301400 |
| C | -5.97485000 | -6.74349300  | -1.25701400 |
| C | -7.19140100 | -10.27098200 | -1.24745100 |
| C | -5.99524900 | -10.97086600 | -1.35207000 |
| C | -4.77870200 | -10.27496100 | -1.42774400 |
| C | -5.98563100 | -8.17492700  | -1.29067100 |
| C | -7.19527200 | -8.88032600  | -1.21932700 |
| H | -8.12913600 | -10.81310500 | -1.18558800 |
| C | -2.48222100 | -11.56858500 | -1.63277900 |
| C | -3.53900500 | -10.98285900 | -1.53907400 |
| C | -0.05044200 | -11.48107800 | -1.90347000 |
| C | 4.46366000  | -8.48928100  | -2.54483700 |
| C | 4.13155500  | -2.99055800  | -2.97734400 |
| C | -4.67996400 | -3.45107100  | -1.04487900 |
| C | -4.77852900 | -8.87702300  | -1.38905500 |
| H | 2.21863200  | -14.00994500 | -2.05268500 |
| H | -2.04962500 | -14.21313600 | -1.56608700 |
| H | 7.75435000  | -7.71481100  | -2.91609500 |
| H | 5.89708700  | -11.57486200 | -2.54076500 |
| H | 5.20260200  | 0.23585600   | -2.88029800 |
| H | 7.48277700  | -3.39290000  | -2.54136700 |
| H | -8.04140500 | -3.85498100  | -1.39332200 |
| H | -5.75496700 | -0.22229300  | -1.09772500 |
| H | -5.99024400 | -12.05526300 | -1.37746000 |
| H | -8.12730200 | -8.33195400  | -1.13442100 |
| H | -0.10718300 | -10.39789000 | -1.92867800 |
| H | 3.49220400  | -8.01486500  | -2.45555700 |
| H | 3.22135600  | -3.57257600  | -3.07671000 |
| H | -3.77231800 | -4.03498900  | -0.92853500 |
| H | -3.83863300 | -8.33574200  | -1.42027500 |
| C | -0.29789400 | 2.77821600   | -3.60929600 |
| C | 1.80725400  | -0.27454200  | -3.32547500 |
| C | 2.82903700  | -0.90931500  | -3.17831200 |

|      |    |             |             |             |
|------|----|-------------|-------------|-------------|
|      | C  | -1.55787400 | 2.23337400  | -3.83379400 |
|      | C  | -1.72079100 | 0.84110000  | -3.90310900 |
|      | C  | 0.65209100  | 0.55436100  | -3.49573800 |
|      | C  | 0.80422800  | 1.94889900  | -3.44743800 |
|      | H  | -0.17353300 | 3.85562600  | -3.56538900 |
|      | C  | -0.61355800 | 0.00349500  | -3.72466100 |
|      | H  | -2.42072800 | 2.87683700  | -3.97128000 |
|      | H  | 1.79171400  | 2.36714500  | -3.28039800 |
|      | H  | -0.73766400 | -1.07350800 | -3.76556600 |
|      | C  | -3.01213100 | 0.29042700  | -4.20296000 |
|      | C  | -4.10636100 | -0.15136100 | -4.50577700 |
|      | Si | -5.72999600 | -0.81633000 | -5.09729500 |
|      | C  | -7.11674800 | 0.17325300  | -4.30941500 |
|      | C  | -5.81670700 | -2.63823900 | -4.66660100 |
|      | C  | -5.79225400 | -0.58805200 | -6.96176100 |
|      | H  | -7.07135000 | 1.21844100  | -4.62869000 |
|      | H  | -7.06852800 | 0.14438100  | -3.21895200 |
|      | H  | -8.08489500 | -0.23370200 | -4.61865500 |
|      | H  | -5.58883600 | -2.80755700 | -3.61111300 |
|      | H  | -5.10213900 | -3.20669500 | -5.26911800 |
|      | H  | -6.81879700 | -3.03055300 | -4.86713100 |
|      | H  | -4.97563300 | -1.12290500 | -7.45421400 |
|      | H  | -5.72319800 | 0.46913900  | -7.23288900 |
|      | H  | -6.73766700 | -0.97725500 | -7.35330100 |
| TS-g | N  | 0.01953700  | -0.96478800 | -0.26338700 |
|      | C  | -0.03202900 | -3.00433700 | -0.20458300 |
|      | H  | 0.46528700  | -2.94620200 | 0.75220200  |
|      | H  | 0.56583900  | -3.00885900 | -1.10340400 |
|      | H  | -1.11023000 | -2.96816300 | -0.26075000 |
|      | O  | 0.01177100  | -4.87952000 | -0.21502100 |
|      | S  | -1.05238600 | -5.63323800 | 0.58564300  |
|      | O  | -1.16950200 | -7.01610200 | 0.09992700  |
|      | O  | -2.30825500 | -4.85854300 | 0.62188900  |
|      | C  | -0.39856200 | -5.70681000 | 2.26719100  |
|      | H  | -0.31989000 | -4.65243600 | 2.56792100  |
|      | C  | -1.36899000 | -6.45097900 | 3.19383900  |
|      | H  | -0.80579300 | -6.72343600 | 4.09514100  |
|      | H  | -1.64641800 | -7.39978300 | 2.71293700  |
|      | C  | -2.62299500 | -5.68564900 | 3.61471400  |
|      | H  | -2.32673900 | -4.71056000 | 4.02460000  |
|      | C  | -3.43050600 | -6.45589600 | 4.65615400  |
|      | H  | -3.24522200 | -5.47609700 | 2.73989100  |
|      | H  | -3.69660500 | -7.45181900 | 4.28540300  |
|      | H  | -4.35972200 | -5.93298700 | 4.89932000  |
|      | H  | -2.86011000 | -6.58702400 | 5.58150300  |
|      | C  | 0.99268200  | -6.35303900 | 2.25131000  |
|      | H  | 1.53315100  | -6.05108800 | 1.34747700  |
|      | H  | 0.87051100  | -7.44300600 | 2.20263100  |
|      | C  | 1.82903000  | -5.97275900 | 3.47425300  |

|   |             |              |             |
|---|-------------|--------------|-------------|
| H | 1.99613800  | -4.88753400  | 3.46642800  |
| C | 3.17006500  | -6.70085100  | 3.49206100  |
| H | 1.27669800  | -6.19636300  | 4.39429300  |
| H | 3.02390300  | -7.78644400  | 3.49104100  |
| H | 3.75474100  | -6.44192100  | 4.37883800  |
| H | 3.76647500  | -6.44409700  | 2.61001900  |
| C | 1.19534100  | -0.33247700  | -0.08607200 |
| C | 1.33401900  | 1.04700100   | -0.10771000 |
| H | 2.31894100  | 1.46861500   | 0.04015500  |
| C | 0.19269800  | 1.85944400   | -0.29003000 |
| N | 0.27477700  | 3.20994400   | -0.29487400 |
| C | -1.03698000 | 1.18864900   | -0.46731600 |
| H | -1.96215900 | 1.72319500   | -0.63490200 |
| C | -1.06932400 | -0.19885200  | -0.46344400 |
| C | 1.57538100  | 3.85575900   | -0.23545700 |
| C | -0.93871200 | 4.00663900   | -0.36649900 |
| H | 1.43884900  | 4.93355500   | -0.30048900 |
| H | 2.20940200  | 3.53653600   | -1.07036100 |
| H | 2.09409400  | 3.62726200   | 0.70286800  |
| H | -1.47232600 | 3.83891600   | -1.30914200 |
| H | -0.67547500 | 5.06065600   | -0.30123500 |
| H | -1.61348500 | 3.76553500   | 0.46265100  |
| C | -1.31479400 | -14.08090000 | 1.70790700  |
| C | -2.37985000 | -13.19067700 | 1.76632600  |
| C | -2.14837700 | -11.80935200 | 1.66645100  |
| C | 0.22701900  | -12.23724100 | 1.43915500  |
| C | -0.01439700 | -13.61380400 | 1.54832400  |
| H | -1.49879200 | -15.14732600 | 1.78472400  |
| C | -3.24163100 | -10.88893200 | 1.74154900  |
| C | -4.17385800 | -10.11835600 | 1.81466800  |
| C | -7.68065500 | -8.91785000  | 2.19147600  |
| C | -7.50210100 | -7.53950500  | 2.18808600  |
| C | -6.21473000 | -6.99838100  | 2.04764500  |
| C | -5.29715500 | -9.23792800  | 1.92146800  |
| C | -6.58800500 | -9.76825400  | 2.06639600  |
| H | -8.67741100 | -9.33313000  | 2.29608300  |
| C | -6.01678300 | -5.58178500  | 2.07160500  |
| C | -5.83429400 | -4.38461400  | 2.11091400  |
| C | -6.47822700 | -0.71564400  | 2.23804000  |
| C | -5.18745600 | -0.21862900  | 2.36929800  |
| C | -4.09353900 | -1.09904000  | 2.40310400  |
| C | -5.61075700 | -2.97276900  | 2.17905600  |
| C | -6.69644500 | -2.08611900  | 2.15069700  |
| H | -7.31986300 | -0.03185400  | 2.20767700  |
| C | 2.35494200  | -1.14982900  | 0.13758500  |
| C | 3.35217300  | -1.81679900  | 0.30357900  |
| C | 6.94290500  | -2.70249100  | 0.75820900  |
| C | 6.89043500  | -4.09033000  | 0.71872400  |
| C | 5.65833600  | -4.74470800  | 0.56251800  |



|    |             |              |            |
|----|-------------|--------------|------------|
| C  | 4.54393400  | -2.59330700  | 0.46733500 |
| C  | 5.77846200  | -1.94988400  | 0.64046400 |
| H  | 7.89874000  | -2.20317800  | 0.87876500 |
| C  | 5.59719300  | -6.17378800  | 0.57250500 |
| C  | 5.53757600  | -7.38276700  | 0.62575500 |
| C  | 6.38891800  | -11.01500400 | 0.77983100 |
| C  | 5.12699100  | -11.57798000 | 0.93072500 |
| C  | 3.99203100  | -10.75351000 | 0.98139200 |
| C  | 5.41198000  | -8.80500700  | 0.71962500 |
| C  | 6.53974400  | -9.63589400  | 0.67626100 |
| H  | 7.26322400  | -11.65604600 | 0.74035600 |
| C  | 1.56016800  | -11.74321000 | 1.27698400 |
| C  | 2.68278400  | -11.30813500 | 1.14195100 |
| C  | -0.84405900 | -11.33733100 | 1.49549800 |
| C  | -5.11582200 | -7.85056400  | 1.89728000 |
| C  | -4.30581700 | -2.47648700  | 2.29066200 |
| C  | 4.48620900  | -3.99161200  | 0.42772100 |
| C  | 4.13964000  | -9.36828400  | 0.86912400 |
| H  | -3.39497200 | -13.55145100 | 1.89297100 |
| H  | 0.81969700  | -14.30538700 | 1.49753900 |
| H  | -8.34961200 | -6.87128300  | 2.29716700 |
| H  | -6.72138900 | -10.84471000 | 2.07335800 |
| H  | -5.01200600 | 0.84880000   | 2.45083600 |
| H  | -7.70178500 | -2.48170700  | 2.05292800 |
| H  | 7.79582700  | -4.67967800  | 0.81633600 |
| H  | 5.81332000  | -0.86549800  | 0.66615200 |
| H  | 5.00781100  | -12.65303400 | 1.01314000 |
| H  | 7.52280700  | -9.19435300  | 0.55354600 |
| H  | -0.66322000 | -10.27138900 | 1.39870000 |
| H  | -4.12264200 | -7.43269900  | 1.75373100 |
| H  | -3.46455200 | -3.16325200  | 2.26889300 |
| H  | 3.53223900  | -4.48959900  | 0.28375100 |
| H  | 3.26524000  | -8.72585000  | 0.89438200 |
| C  | 0.89144700  | 2.59762500   | 2.99010700 |
| C  | -1.67073200 | -0.08837500  | 2.71453300 |
| C  | -2.77045200 | -0.57425600  | 2.56042600 |
| C  | 2.04598300  | 1.85993000   | 3.23103800 |
| C  | 1.98097700  | 0.46081900   | 3.32078400 |
| C  | -0.40354800 | 0.55437500   | 2.88927900 |
| C  | -0.32891000 | 1.95467200   | 2.82562400 |
| H  | 0.94154400  | 3.68060000   | 2.93674600 |
| C  | 0.75477200  | -0.18957100  | 3.14065200 |
| H  | 2.99999700  | 2.35726200   | 3.37091700 |
| H  | -1.23478500 | 2.52357300   | 2.64184500 |
| H  | 0.70122500  | -1.27162600  | 3.20667500 |
| C  | 3.15592700  | -0.29170100  | 3.65587900 |
| C  | 4.14642200  | -0.91271300  | 3.99810100 |
| Si | 5.58972300  | -1.85979100  | 4.66850800 |
| C  | 7.17657200  | -1.06388900  | 4.06199300 |

|   |             |              |             |
|---|-------------|--------------|-------------|
| C | 5.41188600  | -3.64139800  | 4.11551600  |
| C | 5.51354500  | -1.75896300  | 6.54294300  |
| H | 7.27866600  | -0.05452700  | 4.47070000  |
| H | 7.20494400  | -0.99808000  | 2.97232500  |
| H | 8.03963500  | -1.65153900  | 4.39059900  |
| H | 5.30740200  | -3.71284900  | 3.02981900  |
| H | 4.52254400  | -4.08533300  | 4.57353300  |
| H | 6.28218200  | -4.23251400  | 4.41753600  |
| H | 4.58126200  | -2.18563300  | 6.92300900  |
| H | 5.58236500  | -0.72351200  | 6.88765200  |
| H | 6.34628300  | -2.31839600  | 6.98120600  |
| C | 0.06671400  | -14.29969000 | -1.80433900 |
| C | 1.23524500  | -13.56409100 | -1.96028700 |
| C | 1.18045800  | -12.16242800 | -2.01812700 |
| C | -1.22972100 | -12.25849000 | -1.75545700 |
| C | -1.16352200 | -13.65791100 | -1.70376900 |
| H | 0.11431400  | -15.38251600 | -1.75611800 |
| C | 2.37811000  | -11.39430500 | -2.17964400 |
| C | 3.38597100  | -10.73547700 | -2.31593200 |
| C | 6.96589600  | -9.76469400  | -2.72898500 |
| C | 6.86681800  | -8.37961000  | -2.78139100 |
| C | 5.60997500  | -7.76104100  | -2.68601700 |
| C | 4.56679000  | -9.94114200  | -2.47507100 |
| C | 5.82663600  | -10.54829400 | -2.57723300 |
| H | 7.93934700  | -10.23805500 | -2.80253200 |
| C | 5.50070000  | -6.33413200  | -2.73594000 |
| C | 5.41152900  | -5.12610900  | -2.76805300 |
| C | 6.40705500  | -1.53556300  | -2.68080500 |
| C | 5.17910200  | -0.90660000  | -2.83997300 |
| C | 4.00942200  | -1.67143000  | -2.98139400 |
| C | 5.32680500  | -3.69705400  | -2.79695100 |
| C | 6.48855500  | -2.92370900  | -2.65982200 |
| H | 7.30764300  | -0.94123300  | -2.56699500 |
| C | -2.31866100 | -0.86934200  | -0.68758300 |
| C | -3.39031700 | -1.40770800  | -0.85852200 |
| C | -7.05444600 | -1.96992500  | -1.26307000 |
| C | -7.11153300 | -3.35851900  | -1.29310300 |
| C | -5.93191100 | -4.11415600  | -1.19672300 |
| C | -4.65137100 | -2.06403800  | -1.03051400 |
| C | -5.83200400 | -1.31591100  | -1.13829800 |
| H | -7.97050200 | -1.39220600  | -1.33352400 |
| C | -5.97433800 | -5.54496400  | -1.23948600 |
| C | -5.99229100 | -6.75590000  | -1.28101500 |
| C | -7.19602600 | -10.28798500 | -1.29206200 |
| C | -5.99697500 | -10.98310500 | -1.39203500 |
| C | -4.78223200 | -10.28287800 | -1.46009900 |
| C | -5.99747900 | -8.18747500  | -1.32249800 |
| C | -7.20486000 | -8.89734700  | -1.25965400 |
| H | -8.13205400 | -10.83370900 | -1.23574700 |

|    |             |              |             |
|----|-------------|--------------|-------------|
| C  | -2.48749000 | -11.58180900 | -1.65123100 |
| C  | -3.54124100 | -10.98975500 | -1.56398400 |
| C  | -0.05365800 | -11.51451100 | -1.90996500 |
| C  | 4.46396400  | -8.54599200  | -2.52970400 |
| C  | 4.08615700  | -3.06651300  | -2.95353500 |
| C  | -4.70182900 | -3.46289100  | -1.05342600 |
| C  | -4.78713200 | -8.88509900  | -1.41800500 |
| H  | 2.19576800  | -14.06202300 | -2.03928400 |
| H  | -2.07652800 | -14.22924500 | -1.57453400 |
| H  | 7.75406700  | -7.76629800  | -2.89730600 |
| H  | 5.90200900  | -11.62923000 | -2.52642900 |
| H  | 5.10980300  | 0.17577300   | -2.85758500 |
| H  | 7.44441100  | -3.41915600  | -2.52792500 |
| H  | -8.06371200 | -3.86804900  | -1.39577200 |
| H  | -5.78210500 | -0.23216400  | -1.10553000 |
| H  | -5.98774900 | -12.06746700 | -1.41903800 |
| H  | -8.13916300 | -8.35260000  | -1.17623200 |
| H  | -0.10112400 | -10.43108300 | -1.94044500 |
| H  | 3.49184700  | -8.07279500  | -2.44115000 |
| H  | 3.18450500  | -3.66211400  | -3.05080000 |
| H  | -3.78922600 | -4.03710400  | -0.92530600 |
| H  | -3.84947200 | -8.33956500  | -1.44368000 |
| C  | -0.35597400 | 2.69082500   | -3.58114000 |
| C  | 1.72883200  | -0.37410800  | -3.29560100 |
| C  | 2.75474300  | -1.00268300  | -3.14987200 |
| C  | -1.62023800 | 2.15434500   | -3.80226200 |
| C  | -1.79294600 | 0.76306700   | -3.87024600 |
| C  | 0.57793000  | 0.46023200   | -3.46554900 |
| C  | 0.74052100  | 1.85390600   | -3.41964600 |
| H  | -0.22344100 | 3.76744100   | -3.54114800 |
| C  | -0.69154700 | -0.08245000  | -3.69279900 |
| H  | -2.47861700 | 2.80360100   | -3.94017100 |
| H  | 1.73167900  | 2.26497700   | -3.25619800 |
| H  | -0.82303800 | -1.15870400  | -3.73475400 |
| C  | -3.08701700 | 0.22191200   | -4.17359900 |
| C  | -4.18320800 | -0.20915400  | -4.48390800 |
| Si | -5.80549000 | -0.85652700  | -5.09847200 |
| C  | -7.19253800 | 0.13608400   | -4.31543200 |
| C  | -5.90260500 | -2.68150600  | -4.68498100 |
| C  | -5.84550900 | -0.60826900  | -6.96082400 |
| H  | -7.13584700 | 1.18333900   | -4.62596000 |
| H  | -7.15508000 | 0.09855700   | -3.22486700 |
| H  | -8.16071800 | -0.26058000  | -4.63739000 |
| H  | -5.67053700 | -2.86053700  | -3.63213800 |
| H  | -5.19215400 | -3.24748100  | -5.29460400 |
| H  | -6.90683600 | -3.06830400  | -4.88497300 |
| H  | -5.02726100 | -1.14363200  | -7.45003800 |
| H  | -5.76598100 | 0.45125400   | -7.21954100 |
| H  | -6.78931200 | -0.98639200  | -7.36674000 |

|    |   |             |              |             |
|----|---|-------------|--------------|-------------|
| 4g | N | 0.03913900  | -0.88358100  | -0.26700600 |
|    | C | -0.00838200 | -2.35860600  | -0.27588100 |
|    | H | 0.57196600  | -2.73750300  | 0.56390900  |
|    | H | 0.42638300  | -2.73076400  | -1.20532500 |
|    | H | -1.03661600 | -2.69848100  | -0.18031500 |
|    | O | -0.01651600 | -5.26096600  | -0.33104700 |
|    | S | -1.12650200 | -5.74194100  | 0.53035900  |
|    | O | -1.55270300 | -7.12864600  | 0.21676900  |
|    | O | -2.26016600 | -4.77566100  | 0.56750900  |
|    | C | -0.45007500 | -5.78873300  | 2.21727500  |
|    | H | -0.30887000 | -4.72696400  | 2.46514500  |
|    | C | -1.43417200 | -6.43362600  | 3.19876500  |
|    | H | -0.88821000 | -6.63892800  | 4.12891300  |
|    | H | -1.72794800 | -7.41172100  | 2.79186000  |
|    | C | -2.67813500 | -5.61368300  | 3.53651100  |
|    | H | -2.36830000 | -4.61314900  | 3.86986600  |
|    | C | -3.52341100 | -6.27570100  | 4.62140300  |
|    | H | -3.27692100 | -5.46201000  | 2.63405800  |
|    | H | -3.80827100 | -7.29201800  | 4.32692700  |
|    | H | -4.44370600 | -5.71255000  | 4.80331300  |
|    | H | -2.97295900 | -6.34589300  | 5.56583700  |
|    | C | 0.91078500  | -6.49592000  | 2.22461800  |
|    | H | 1.45791300  | -6.23550800  | 1.31235600  |
|    | H | 0.74790000  | -7.58249700  | 2.20280200  |
|    | C | 1.76672400  | -6.12520400  | 3.43761500  |
|    | H | 1.95327600  | -5.04298600  | 3.42229700  |
|    | C | 3.09660800  | -6.87426200  | 3.45165900  |
|    | H | 1.22082600  | -6.33262100  | 4.36524500  |
|    | H | 2.93405800  | -7.95769800  | 3.45205100  |
|    | H | 3.68921600  | -6.62438700  | 4.33621700  |
|    | H | 3.69459000  | -6.62664200  | 2.56752100  |
|    | C | 1.24037000  | -0.25347200  | -0.08887100 |
|    | C | 1.34885200  | 1.11838800   | -0.10203300 |
|    | H | 2.33146400  | 1.54343000   | 0.04394000  |
|    | C | 0.19633600  | 1.92836900   | -0.26502400 |
|    | N | 0.26965000  | 3.26728800   | -0.24963600 |
|    | C | -1.03417000 | 1.25029400   | -0.44602400 |
|    | H | -1.96125100 | 1.78199000   | -0.60542100 |
|    | C | -1.08249600 | -0.12704500  | -0.46521900 |
|    | C | 1.56827700  | 3.92599800   | -0.17482900 |
|    | C | -0.94949000 | 4.06371300   | -0.31929000 |
|    | H | 1.41895400  | 5.00266800   | -0.20836300 |
|    | H | 2.19910100  | 3.63534700   | -1.02098500 |
|    | H | 2.08526600  | 3.67359800   | 0.75691800  |
|    | H | -1.47000900 | 3.90400700   | -1.26928600 |
|    | H | -0.68816200 | 5.11632600   | -0.23792900 |
|    | H | -1.62529800 | 3.80736500   | 0.50269600  |
|    | C | -1.26553200 | -14.03920900 | 1.85114400  |
|    | C | -2.34743300 | -13.16789000 | 1.88768100  |

|   |             |              |            |
|---|-------------|--------------|------------|
| C | -2.14318500 | -11.78622700 | 1.74474900 |
| C | 0.23916100  | -12.17453600 | 1.52066800 |
| C | 0.02481600  | -13.55179200 | 1.67334200 |
| H | -1.42864100 | -15.10621100 | 1.96112700 |
| C | -3.25213500 | -10.88295000 | 1.79990900 |
| C | -4.19165300 | -10.12001400 | 1.85844300 |
| C | -7.70489500 | -8.91797200  | 2.18476300 |
| C | -7.52564900 | -7.53953500  | 2.16554600 |
| C | -6.23658900 | -7.00083500  | 2.03041500 |
| C | -5.31881600 | -9.24182600  | 1.94413300 |
| C | -6.61128800 | -9.77031900  | 2.08235500 |
| H | -8.70293400 | -9.33145900  | 2.28461100 |
| C | -6.03641700 | -5.58440200  | 2.03627600 |
| C | -5.84536700 | -4.38831900  | 2.06861600 |
| C | -6.43844200 | -0.70874500  | 2.21726600 |
| C | -5.14007500 | -0.23248500  | 2.34908000 |
| C | -4.06035400 | -1.13079500  | 2.37124000 |
| C | -5.60603400 | -2.97904600  | 2.13897600 |
| C | -6.67828200 | -2.07559600  | 2.12259000 |
| H | -7.26965100 | -0.01198500  | 2.19420100 |
| C | 2.39371500  | -1.06465700  | 0.11886800 |
| C | 3.38969100  | -1.73539300  | 0.27653100 |
| C | 6.97739200  | -2.64015000  | 0.68688000 |
| C | 6.91402200  | -4.02756300  | 0.64225100 |
| C | 5.67623600  | -4.67542800  | 0.50428600 |
| C | 4.57763200  | -2.51778000  | 0.42987500 |
| C | 5.81671400  | -1.87915000  | 0.59035300 |
| H | 7.93830100  | -2.14806800  | 0.79499300 |
| C | 5.60701900  | -6.10353800  | 0.52804300 |
| C | 5.54100900  | -7.31126900  | 0.59861200 |
| C | 6.38833600  | -10.94043600 | 0.81526900 |
| C | 5.12623200  | -11.49911300 | 0.97959100 |
| C | 3.99152000  | -10.67326500 | 1.01352000 |
| C | 5.41229900  | -8.73180100  | 0.71208200 |
| C | 6.53974200  | -9.56365300  | 0.68483000 |
| H | 7.26228800  | -11.58255900 | 0.78851200 |
| C | 1.56458300  | -11.66490700 | 1.34232100 |
| C | 2.68357800  | -11.22522800 | 1.19229400 |
| C | -0.84879300 | -11.29396300 | 1.55211300 |
| C | -5.13601300 | -7.85509900  | 1.90274300 |
| C | -4.29267600 | -2.50341900  | 2.24337600 |
| C | 4.50700200  | -3.91524800  | 0.38694100 |
| C | 4.13906700  | -9.29114700  | 0.86956200 |
| H | -3.35475700 | -13.54431200 | 2.03075200 |
| H | 0.87237100  | -14.22798500 | 1.64161000 |
| H | -8.37425800 | -6.86994600  | 2.25695000 |
| H | -6.74532600 | -10.84661400 | 2.10302000 |
| H | -4.94803900 | 0.83133700   | 2.44053000 |
| H | -7.69037600 | -2.45470200  | 2.02832500 |

|    |             |              |             |
|----|-------------|--------------|-------------|
| H  | 7.81705600  | -4.62282400  | 0.72448000  |
| H  | 5.85830400  | -0.79532300  | 0.62183600  |
| H  | 5.00643800  | -12.57200500 | 1.08628400  |
| H  | 7.52306000  | -9.12459200  | 0.55541400  |
| H  | -0.69160700 | -10.22831400 | 1.41661000  |
| H  | -4.14056900 | -7.44376800  | 1.75374700  |
| H  | -3.46260200 | -3.20299100  | 2.19998400  |
| H  | 3.54756900  | -4.40661200  | 0.25825200  |
| H  | 3.26424300  | -8.64889400  | 0.88040100  |
| C  | 0.96545700  | 2.49348000   | 3.04696800  |
| C  | -1.62497400 | -0.15801800  | 2.70375800  |
| C  | -2.72963500 | -0.62868700  | 2.53777300  |
| C  | 2.11372000  | 1.73701600   | 3.25988800  |
| C  | 2.03418400  | 0.33676100   | 3.31288200  |
| C  | -0.35136100 | 0.46725200   | 2.89378600  |
| C  | -0.26299300 | 1.86832200   | 2.87016000  |
| H  | 1.02580700  | 3.57710600   | 3.03006800  |
| C  | 0.80008800  | -0.29578700  | 3.12086100  |
| H  | 3.07315200  | 2.22054100   | 3.41008100  |
| H  | -1.16458200 | 2.45173500   | 2.71224800  |
| H  | 0.73440400  | -1.37860800  | 3.16277200  |
| C  | 3.19983900  | -0.43575100  | 3.63421700  |
| C  | 4.18075800  | -1.07133600  | 3.97715200  |
| Si | 5.59995400  | -2.04338900  | 4.66627900  |
| C  | 7.20654300  | -1.24156700  | 4.12391100  |
| C  | 5.43293100  | -3.80957800  | 4.06402100  |
| C  | 5.46435200  | -1.98628600  | 6.53887600  |
| H  | 7.30045600  | -0.24097600  | 4.55554200  |
| H  | 7.26698600  | -1.15425700  | 3.03665000  |
| H  | 8.05734600  | -1.83938900  | 4.46574500  |
| H  | 5.37221900  | -3.85191400  | 2.97393400  |
| H  | 4.52375800  | -4.26042600  | 4.47380500  |
| H  | 6.28811700  | -4.41277300  | 4.38472900  |
| H  | 4.51977900  | -2.41975800  | 6.87884400  |
| H  | 5.52416600  | -0.95953300  | 6.91010700  |
| H  | 6.28179800  | -2.55817700  | 6.98967400  |
| C  | 0.14076600  | -14.30368900 | -1.66179000 |
| C  | 1.30308300  | -13.56386000 | -1.84357300 |
| C  | 1.23659000  | -12.16526700 | -1.94603400 |
| C  | -1.17191200 | -12.27281400 | -1.67482900 |
| C  | -1.09483900 | -13.66915900 | -1.57937100 |
| H  | 0.19754400  | -15.38410400 | -1.57883100 |
| C  | 2.42586000  | -11.38960200 | -2.13178300 |
| C  | 3.42397400  | -10.72011300 | -2.28627200 |
| C  | 6.98982100  | -9.71208900  | -2.72895000 |
| C  | 6.87401100  | -8.32917000  | -2.80052700 |
| C  | 5.60997500  | -7.72427400  | -2.71158800 |
| C  | 4.59340000  | -9.91337400  | -2.46638800 |
| C  | 5.86027200  | -10.50676200 | -2.56306100 |

|   |             |              |             |
|---|-------------|--------------|-------------|
| H | 7.96870800  | -10.17474800 | -2.79788600 |
| C | 5.48537000  | -6.29901000  | -2.77595400 |
| C | 5.38479500  | -5.09203000  | -2.81460900 |
| C | 6.36277400  | -1.49595900  | -2.74781400 |
| C | 5.12988000  | -0.87292200  | -2.89061300 |
| C | 3.96275000  | -1.64444300  | -3.01633700 |
| C | 5.29107900  | -3.66362600  | -2.84886400 |
| C | 6.45055000  | -2.88377400  | -2.72743100 |
| H | 7.26205500  | -0.89754700  | -2.64616200 |
| C | -2.31838900 | -0.79440700  | -0.70277800 |
| C | -3.38307700 | -1.34084100  | -0.88932600 |
| C | -7.03261000 | -1.97743700  | -1.28872200 |
| C | -7.05647700 | -3.36713200  | -1.31238900 |
| C | -5.86089200 | -4.09787000  | -1.21461100 |
| C | -4.63029600 | -2.01986000  | -1.06290200 |
| C | -5.82514800 | -1.29494800  | -1.17219200 |
| H | -7.96242100 | -1.42214800  | -1.35787700 |
| C | -5.88037200 | -5.52933100  | -1.25108900 |
| C | -5.89503800 | -6.74048700  | -1.28385600 |
| C | -7.13554000 | -10.25767400 | -1.33450100 |
| C | -5.94214300 | -10.96625700 | -1.40617100 |
| C | -4.71813000 | -10.28013400 | -1.43504500 |
| C | -5.91073400 | -8.17199600  | -1.32363900 |
| C | -7.12823200 | -8.86722100  | -1.29839200 |
| H | -8.07917500 | -10.79246900 | -1.30682500 |
| C | -2.43191800 | -11.59841000 | -1.58662100 |
| C | -3.48285400 | -10.99973200 | -1.51408100 |
| C | -0.00243300 | -11.52446900 | -1.85549600 |
| C | 4.47346600  | -8.52044200  | -2.54208900 |
| C | 4.04525000  | -3.03925600  | -2.98898500 |
| C | -4.64495100 | -3.42042500  | -1.07436000 |
| C | -4.70558100 | -8.88250700  | -1.38144200 |
| H | 2.26745900  | -14.05657600 | -1.90845600 |
| H | -2.00277200 | -14.24356100 | -1.42940900 |
| H | 7.75357800  | -7.70674700  | -2.92619800 |
| H | 5.94873300  | -11.58585500 | -2.49605700 |
| H | 5.05449200  | 0.20903300   | -2.90742300 |
| H | 7.41044400  | -3.37445100  | -2.60737100 |
| H | -7.99738800 | -3.89846200  | -1.40876700 |
| H | -5.79811200 | -0.21023100  | -1.14566800 |
| H | -5.94491300 | -12.05052900 | -1.44077900 |
| H | -8.05785300 | -8.31093500  | -1.24242000 |
| H | -0.05912800 | -10.44294400 | -1.91864800 |
| H | 3.49605900  | -8.05751500  | -2.45697800 |
| H | 3.14467900  | -3.63853300  | -3.07240600 |
| H | -3.71993800 | -3.97204300  | -0.92980100 |
| H | -3.76060800 | -8.34889200  | -1.36050200 |
| C | -0.42472900 | 2.70424200   | -3.55893200 |
| C | 1.67512100  | -0.35371000  | -3.30346500 |

|    |    |             |             |             |
|----|----|-------------|-------------|-------------|
|    | C  | 2.70357800  | -0.98073700 | -3.16932800 |
|    | C  | -1.68806200 | 2.16264700  | -3.77569000 |
|    | C  | -1.85386800 | 0.77082700  | -3.85203800 |
|    | C  | 0.52067500  | 0.47779000  | -3.46081600 |
|    | C  | 0.67747600  | 1.87217200  | -3.40817100 |
|    | H  | -0.29654700 | 3.78140600  | -3.51881300 |
|    | C  | -0.74734100 | -0.07002300 | -3.68465800 |
|    | H  | -2.54989600 | 2.80848600  | -3.90725800 |
|    | H  | 1.66830000  | 2.28709600  | -3.25254900 |
|    | H  | -0.87269600 | -1.14665600 | -3.73694400 |
|    | C  | -3.14321300 | 0.22279700  | -4.16134000 |
|    | C  | -4.23500900 | -0.21243700 | -4.48065700 |
|    | Si | -5.84773800 | -0.86451200 | -5.11759200 |
|    | C  | -7.24940400 | 0.10981800  | -4.33764100 |
|    | C  | -5.92867200 | -2.69516200 | -4.72617800 |
|    | C  | -5.87234200 | -0.59393100 | -6.97692800 |
|    | H  | -7.19925900 | 1.15946000  | -4.64127100 |
|    | H  | -7.22112100 | 0.06617500  | -3.24715100 |
|    | H  | -8.21125400 | -0.29318300 | -4.67048800 |
|    | H  | -5.69075300 | -2.88614400 | -3.67674400 |
|    | H  | -5.21460300 | -3.24631900 | -5.34508500 |
|    | H  | -6.92969600 | -3.08903900 | -4.92811400 |
|    | H  | -5.04608900 | -1.11734700 | -7.46550000 |
|    | H  | -5.79897900 | 0.46921900  | -7.22220300 |
|    | H  | -6.80991200 | -0.97429600 | -7.39508000 |
| 3h | N  | 0.03836800  | -0.98037200 | -0.26053000 |
|    | C  | -0.60632400 | -3.91842000 | -0.10901400 |
|    | H  | 0.15365000  | -3.77119500 | 0.66271200  |
|    | H  | -0.23938500 | -3.53471000 | -1.05709900 |
|    | H  | -1.53572200 | -3.41082400 | 0.15825500  |
|    | O  | -0.83471100 | -5.33582900 | -0.31778200 |
|    | S  | -1.80615900 | -6.09937000 | 0.70414100  |
|    | O  | -1.89112400 | -7.45785000 | 0.18531700  |
|    | O  | -3.03274700 | -5.32401900 | 0.85648000  |
|    | C  | -0.90044500 | -6.09565300 | 2.26004300  |
|    | H  | -0.86042400 | -5.03465300 | 2.54295600  |
|    | C  | -1.70659400 | -6.89579400 | 3.29547100  |
|    | H  | -1.00255200 | -7.18101900 | 4.08625700  |
|    | H  | -2.03354700 | -7.83816200 | 2.83156300  |
|    | C  | -2.89224700 | -6.16511600 | 3.92288600  |
|    | H  | -2.52807400 | -5.26413600 | 4.43562600  |
|    | C  | -3.64023000 | -7.05228300 | 4.91606900  |
|    | H  | -3.58708000 | -5.82084800 | 3.14787300  |
|    | H  | -3.95517900 | -7.97156300 | 4.40422000  |
|    | C  | -4.85975100 | -6.35369400 | 5.50902900  |
|    | H  | -2.95660400 | -7.36206900 | 5.71689700  |
|    | C  | 0.51215600  | -6.65114900 | 2.04895500  |
|    | H  | 0.89683400  | -6.36236200 | 1.06449300  |
|    | H  | 0.46498000  | -7.74750500 | 2.06460900  |



|   |             |              |             |
|---|-------------|--------------|-------------|
| C | 1.48566200  | -6.14710200  | 3.11577700  |
| H | 1.60614000  | -5.06012100  | 3.00415200  |
| C | 2.84502100  | -6.82785200  | 2.98687500  |
| H | 1.08018900  | -6.31608200  | 4.12157700  |
| H | 2.72996200  | -7.90066500  | 3.19119700  |
| C | 3.91009600  | -6.22777400  | 3.89684500  |
| H | 3.18533800  | -6.74415200  | 1.94763700  |
| C | 1.21048900  | -0.35724800  | -0.06128100 |
| C | 1.38442300  | 1.02396500   | -0.05470100 |
| H | 2.37433900  | 1.42711500   | 0.11490200  |
| C | 0.26453000  | 1.85995600   | -0.23774300 |
| N | 0.37213100  | 3.21521400   | -0.22617300 |
| C | -0.97372500 | 1.21479300   | -0.43437100 |
| H | -1.88877000 | 1.76991700   | -0.59368100 |
| C | -1.02010400 | -0.17563500  | -0.45176600 |
| C | 1.67968700  | 3.83397900   | -0.11693500 |
| C | -0.82694800 | 4.03085600   | -0.27052800 |
| H | 1.56943800  | 4.91431300   | -0.19889200 |
| H | 2.34149000  | 3.49445800   | -0.92246600 |
| H | 2.15882800  | 3.60465200   | 0.84334500  |
| H | -1.37647000 | 3.88358800   | -1.20825600 |
| H | -0.54646100 | 5.08048100   | -0.19812900 |
| H | -1.49712800 | 3.79270800   | 0.56455600  |
| C | -1.37861700 | -14.05505200 | 1.69176000  |
| C | -2.44563600 | -13.16747300 | 1.75042400  |
| C | -2.21668300 | -11.78454000 | 1.66602500  |
| C | 0.16285600  | -12.20570200 | 1.45538300  |
| C | -0.07796500 | -13.58379000 | 1.54897000  |
| H | -1.56110800 | -15.12256200 | 1.75604400  |
| C | -3.31834500 | -10.87268100 | 1.74149200  |
| C | -4.26971000 | -10.12437600 | 1.81127500  |
| C | -7.79681400 | -8.96745900  | 2.17395300  |
| C | -7.63586700 | -7.58642700  | 2.15796500  |
| C | -6.35558100 | -7.03169100  | 2.00896800  |
| C | -5.41033200 | -9.26329000  | 1.90542500  |
| C | -6.69473900 | -9.80744500  | 2.05647700  |
| H | -8.78833300 | -9.39356700  | 2.28481200  |
| C | -6.15468500 | -5.61478900  | 2.02562100  |
| C | -5.92026400 | -4.42736500  | 2.07716300  |
| C | -6.37078500 | -0.72922900  | 2.19231800  |
| C | -5.05827500 | -0.30378900  | 2.34775000  |
| C | -4.01292100 | -1.24145500  | 2.41094300  |
| C | -5.62573800 | -3.02960000  | 2.15457400  |
| C | -6.66120900 | -2.08637900  | 2.10223400  |
| H | -7.17264800 | -0.00004200  | 2.14063700  |
| C | 2.35920700  | -1.19675700  | 0.16735800  |
| C | 3.34868900  | -1.87508000  | 0.33807600  |
| C | 6.95649400  | -2.72634900  | 0.72958100  |
| C | 6.91304100  | -4.11497200  | 0.76696600  |

|    |             |              |            |
|----|-------------|--------------|------------|
| C  | 5.68014600  | -4.78147300  | 0.68726500 |
| C  | 4.54652800  | -2.64143000  | 0.51295100 |
| C  | 5.78451500  | -1.98701700  | 0.60188700 |
| H  | 7.91241400  | -2.21567500  | 0.79029700 |
| C  | 5.62146700  | -6.21150700  | 0.71949100 |
| C  | 5.55508400  | -7.42109500  | 0.76327700 |
| C  | 6.36259400  | -11.06114400 | 1.00588600 |
| C  | 5.08960400  | -11.61267700 | 1.10142300 |
| C  | 3.96112100  | -10.77850300 | 1.07475800 |
| C  | 5.41145200  | -8.84292700  | 0.85898800 |
| C  | 6.53175700  | -9.68486900  | 0.89194800 |
| H  | 7.23230500  | -11.70933200 | 1.02264400 |
| C  | 1.50213900  | -11.71806900 | 1.31684700 |
| C  | 2.63742000  | -11.31057300 | 1.19880700 |
| C  | -0.91147100 | -11.30857200 | 1.51000200 |
| C  | -5.24798900 | -7.87453500  | 1.86579000 |
| C  | -4.29777700 | -2.60523700  | 2.30111500 |
| C  | 4.49880000  | -4.04006500  | 0.56169700 |
| C  | 4.12879700  | -9.39795700  | 0.93641600 |
| H  | -3.46099100 | -13.53134300 | 1.86538300 |
| H  | 0.75801500  | -14.27321800 | 1.49985600 |
| H  | -8.49197500 | -6.92849000  | 2.26332300 |
| H  | -6.81668900 | -10.88518800 | 2.07666600 |
| H  | -4.82576400 | 0.75319900   | 2.42428600 |
| H  | -7.68401100 | -2.42747700  | 1.98199000 |
| H  | 7.82579600  | -4.69380500  | 0.85901000 |
| H  | 5.81330400  | -0.90320000  | 0.55105000 |
| H  | 4.95819000  | -12.68479300 | 1.20189400 |
| H  | 7.52460500  | -9.25397000  | 0.81926000 |
| H  | -0.73454000 | -10.24133900 | 1.42285100 |
| H  | -4.26360900 | -7.44428200  | 1.71016300 |
| H  | -3.50011800 | -3.34233200  | 2.31772200 |
| H  | 3.54428800  | -4.55184700  | 0.48236300 |
| H  | 3.25679700  | -8.75491800  | 0.89029100 |
| C  | 0.71923500  | 2.63508000   | 3.05065300 |
| C  | -1.58264700 | -0.26359200  | 2.75949100 |
| C  | -2.67434200 | -0.76122900  | 2.58365600 |
| C  | 1.94342200  | 2.01133300   | 3.26596700 |
| C  | 2.02112800  | 0.61097200   | 3.32811500 |
| C  | -0.36548300 | 0.47155200   | 2.93337400 |
| C  | -0.43087100 | 1.87421000   | 2.89062700 |
| H  | 0.66156200  | 3.71843300   | 3.00756100 |
| C  | 0.86394100  | -0.15826100  | 3.15527200 |
| H  | 2.84652900  | 2.59813700   | 3.39968400 |
| H  | -1.39202700 | 2.35020300   | 2.72467300 |
| H  | 0.92256900  | -1.24148000  | 3.18815400 |
| C  | 3.28610000  | -0.00952600  | 3.60382200 |
| C  | 4.36619600  | -0.49545900  | 3.89012000 |
| Si | 5.97940600  | -1.21390000  | 4.44675900 |

|   |             |              |             |
|---|-------------|--------------|-------------|
| C | 7.38035600  | -0.35562400  | 3.53484300  |
| C | 5.93740800  | -3.06524300  | 4.15239000  |
| C | 6.14815600  | -0.87442800  | 6.28758100  |
| H | 7.45472900  | 0.68819700   | 3.85434800  |
| H | 7.24261600  | -0.37175200  | 2.45161700  |
| H | 8.33043200  | -0.84840200  | 3.76551100  |
| H | 5.61609500  | -3.30746100  | 3.13515300  |
| H | 5.24233900  | -3.53397100  | 4.85626700  |
| H | 6.92822800  | -3.50315200  | 4.31190500  |
| H | 5.33510700  | -1.34266600  | 6.84957400  |
| H | 6.13708500  | 0.19894700   | 6.49612500  |
| H | 7.09455400  | -1.28186200  | 6.65772600  |
| C | 0.06556000  | -14.26513300 | -1.81092100 |
| C | 1.23534900  | -13.52683400 | -1.94395200 |
| C | 1.18001000  | -12.12457700 | -1.98756300 |
| C | -1.23328500 | -12.22556700 | -1.75533800 |
| C | -1.16646600 | -13.62546100 | -1.71805500 |
| H | 0.11363500  | -15.34844800 | -1.77450800 |
| C | 2.37976600  | -11.35404900 | -2.12036500 |
| C | 3.39086900  | -10.69501500 | -2.22961700 |
| C | 6.98666400  | -9.73585500  | -2.49400500 |
| C | 6.89391200  | -8.35148600  | -2.56864600 |
| C | 5.63568500  | -7.72861800  | -2.54147200 |
| C | 4.57822800  | -9.90412900  | -2.35393100 |
| C | 5.83940500  | -10.51533000 | -2.38647200 |
| H | 7.96135700  | -10.21221600 | -2.51266900 |
| C | 5.53799300  | -6.30135800  | -2.60971300 |
| C | 5.46992900  | -5.09243600  | -2.66124100 |
| C | 6.57077700  | -1.53275900  | -2.69872100 |
| C | 5.35871000  | -0.87070400  | -2.84687200 |
| C | 4.16295000  | -1.60154500  | -2.93882500 |
| C | 5.42229900  | -3.66222000  | -2.72232200 |
| C | 6.61030100  | -2.92127200  | -2.63826600 |
| H | 7.49158000  | -0.96359900  | -2.62676700 |
| C | -2.28199500 | -0.82784500  | -0.68778700 |
| C | -3.35213600 | -1.37058500  | -0.85690200 |
| C | -7.01381200 | -1.92738000  | -1.30637400 |
| C | -7.07523400 | -3.31543800  | -1.34457100 |
| C | -5.89876100 | -4.07453800  | -1.23798900 |
| C | -4.61119100 | -2.02792400  | -1.04288800 |
| C | -5.79120800 | -1.27908700  | -1.15751600 |
| H | -7.92639400 | -1.34535600  | -1.38699200 |
| C | -5.94725500 | -5.50503800  | -1.28630900 |
| C | -5.97832400 | -6.71592800  | -1.32623000 |
| C | -7.20079100 | -10.24283700 | -1.33302200 |
| C | -6.00446200 | -10.94397400 | -1.42525600 |
| C | -4.78671100 | -10.24845400 | -1.48579800 |
| C | -5.99281300 | -8.14765800  | -1.36354900 |
| C | -7.20376800 | -8.85191400  | -1.30516700 |

|    |             |              |             |
|----|-------------|--------------|-------------|
| H  | -8.13967400 | -10.78412400 | -1.27987000 |
| C  | -2.49225700 | -11.55031200 | -1.65851900 |
| C  | -3.54648900 | -10.95778100 | -1.58066500 |
| C  | -0.05611600 | -11.47914300 | -1.88838400 |
| C  | 4.48147900  | -8.50926200  | -2.43131800 |
| C  | 4.19873500  | -2.99756600  | -2.87003900 |
| C  | -4.66871500 | -3.42626200  | -1.08237500 |
| C  | -4.78466600 | -8.85064100  | -1.44654300 |
| H  | 2.19727400  | -14.02325500 | -2.01613400 |
| H  | -2.08050000 | -14.19893800 | -1.60630200 |
| H  | 7.78742900  | -7.74137600  | -2.64658600 |
| H  | 5.90955100  | -11.59554200 | -2.31629200 |
| H  | 5.32288400  | 0.21225100   | -2.89762600 |
| H  | 7.55388200  | -3.44234900  | -2.51683300 |
| H  | -8.02736400 | -3.82191000  | -1.46159400 |
| H  | -5.73940800 | -0.19585400  | -1.11249400 |
| H  | -5.99982600 | -12.02845100 | -1.44967400 |
| H  | -8.13633800 | -8.30301500  | -1.22915500 |
| H  | -0.10451800 | -10.39549400 | -1.90866300 |
| H  | 3.50737700  | -8.03297500  | -2.39643500 |
| H  | 3.27693800  | -3.56652800  | -2.92813000 |
| H  | -3.76416200 | -4.01300600  | -0.96633000 |
| H  | -3.84372800 | -8.30995500  | -1.46059600 |
| C  | -0.19726100 | 2.79606000   | -3.51875100 |
| C  | 1.90786300  | -0.26050300  | -3.25908500 |
| C  | 2.92468000  | -0.90257800  | -3.10889400 |
| C  | -1.45304800 | 2.25346200   | -3.77014700 |
| C  | -1.61259100 | 0.86219300   | -3.86539200 |
| C  | 0.75498700  | 0.57192600   | -3.42925100 |
| C  | 0.90427000  | 1.96575400   | -3.35685400 |
| H  | -0.07516000 | 3.87275400   | -3.45407300 |
| C  | -0.50673500 | 0.02345700   | -3.68437900 |
| H  | -2.31485000 | 2.89798700   | -3.90928100 |
| H  | 1.88854700  | 2.38322200   | -3.16984000 |
| H  | -0.62838100 | -1.05298700  | -3.74507900 |
| C  | -2.89753200 | 0.31420000   | -4.19589700 |
| C  | -3.98851600 | -0.11854200  | -4.52245800 |
| Si | -5.61235200 | -0.75768200  | -5.14049900 |
| C  | -6.99468200 | 0.24928600   | -4.36723000 |
| C  | -5.73554700 | -2.57826200  | -4.71406500 |
| C  | -5.64228800 | -0.52466400  | -7.00533300 |
| H  | -6.91679400 | 1.29998000   | -4.66111500 |
| H  | -6.97454700 | 0.19415600   | -3.27655500 |
| H  | -7.96398000 | -0.12724300  | -4.70943900 |
| H  | -5.55229000 | -2.74864100  | -3.65006000 |
| H  | -5.00336500 | -3.15492700  | -5.28700200 |
| H  | -6.73294900 | -2.95985600  | -4.95453600 |
| H  | -4.82565100 | -1.07046900  | -7.48616600 |
| H  | -5.55345900 | 0.53192600   | -7.27325400 |

|      |   |             |             |             |
|------|---|-------------|-------------|-------------|
|      | H | -6.58697300 | -0.89943100 | -7.41228700 |
|      | H | -5.38561100 | -6.99757200 | 6.21896300  |
|      | H | -5.56203100 | -6.07251100 | 4.71726700  |
|      | H | -4.56731400 | -5.43921700 | 6.03528300  |
|      | H | 4.09934300  | -5.18400400 | 3.62448200  |
|      | H | 4.85605600  | -6.77058500 | 3.80732600  |
|      | H | 3.59869500  | -6.25323400 | 4.94652800  |
| TS-h | N | -0.09496300 | -1.04234600 | -0.19368300 |
|      | C | -0.39607000 | -3.06480200 | -0.17655800 |
|      | H | 0.45965000  | -3.16304200 | 0.47632500  |
|      | H | -0.24641000 | -3.05449100 | -1.24567000 |
|      | H | -1.38349900 | -2.89250800 | 0.23045700  |
|      | O | -0.63121500 | -4.92583000 | -0.27170900 |
|      | S | -1.61226700 | -5.60252900 | 0.68669100  |
|      | O | -1.94018400 | -6.95258600 | 0.19995000  |
|      | O | -2.76366700 | -4.72020300 | 0.94937700  |
|      | C | -0.70474200 | -5.78589800 | 2.23750700  |
|      | H | -0.53515100 | -4.75065000 | 2.56596700  |
|      | C | -1.55300000 | -6.54517000 | 3.26495100  |
|      | H | -0.87382600 | -6.86953500 | 4.06346800  |
|      | H | -1.92006100 | -7.46657000 | 2.78970000  |
|      | C | -2.71270300 | -5.77535600 | 3.89424100  |
|      | H | -2.32762800 | -4.85233400 | 4.35137200  |
|      | C | -3.43462100 | -6.60420900 | 4.95486200  |
|      | H | -3.42712200 | -5.46369700 | 3.12433800  |
|      | H | -3.78820000 | -7.53823900 | 4.49740200  |
|      | C | -4.61457500 | -5.85648100 | 5.56904500  |
|      | H | -2.72400000 | -6.89393000 | 5.73987200  |
|      | C | 0.63363900  | -6.48179100 | 1.97519200  |
|      | H | 1.03542500  | -6.15987900 | 1.00862200  |
|      | H | 0.45416500  | -7.56232800 | 1.90228800  |
|      | C | 1.67913400  | -6.20112700 | 3.05554600  |
|      | H | 1.98163600  | -5.14546700 | 3.00108800  |
|      | C | 2.89850600  | -7.09895200 | 2.87124900  |
|      | H | 1.25768800  | -6.35408600 | 4.05730800  |
|      | H | 2.58910300  | -8.14495900 | 3.00034600  |
|      | C | 4.05816600  | -6.77733300 | 3.80536600  |
|      | H | 3.24700500  | -7.00361700 | 1.83590700  |
|      | C | 1.12217500  | -0.49490300 | -0.01964300 |
|      | C | 1.35967600  | 0.87296500  | -0.06112500 |
|      | H | 2.37215600  | 1.22369400  | 0.08701700  |
|      | C | 0.28435200  | 1.76372900  | -0.27038400 |
|      | N | 0.46375200  | 3.10432000  | -0.30774200 |
|      | C | -0.98988100 | 1.17994300  | -0.44916700 |
|      | H | -1.87199800 | 1.77661200  | -0.63839600 |
|      | C | -1.12272800 | -0.20001400 | -0.42315600 |
|      | C | 1.80305400  | 3.65977300  | -0.21167600 |
|      | C | -0.69119400 | 3.98355100  | -0.37852100 |
|      | H | 1.74740100  | 4.74004500  | -0.33322800 |

|   |             |              |             |
|---|-------------|--------------|-------------|
| H | 2.44884100  | 3.25766200   | -0.99989100 |
| H | 2.26149000  | 3.44054100   | 0.76006700  |
| H | -1.25392500 | 3.82655000   | -1.30551900 |
| H | -0.35224600 | 5.01738500   | -0.35196000 |
| H | -1.36480200 | 3.81623200   | 0.47007300  |
| C | -1.32068100 | -14.02215800 | 1.57998600  |
| C | -2.33040300 | -13.07350700 | 1.67788000  |
| C | -2.01921000 | -11.70434400 | 1.62848100  |
| C | 0.32672200  | -12.26480100 | 1.36840000  |
| C | 0.00467800  | -13.62747000 | 1.42906800  |
| H | -1.56752100 | -15.07800100 | 1.61708000  |
| C | -3.06971600 | -10.73721400 | 1.74067100  |
| C | -3.99657300 | -9.96204300  | 1.84024600  |
| C | -7.53837300 | -8.91354000  | 2.29967800  |
| C | -7.42511900 | -7.52858400  | 2.28868100  |
| C | -6.16924000 | -6.92759900  | 2.11313000  |
| C | -5.14776500 | -9.11997300  | 1.97565100  |
| C | -6.40935900 | -9.71037400  | 2.14997100  |
| H | -8.51160600 | -9.37538300  | 2.42837700  |
| C | -6.04378700 | -5.50249500  | 2.11512300  |
| C | -5.90455200 | -4.29937000  | 2.13556900  |
| C | -6.60545600 | -0.63556200  | 2.16634600  |
| C | -5.32538700 | -0.11999600  | 2.32850600  |
| C | -4.22452900 | -0.98739600  | 2.42189700  |
| C | -5.71188600 | -2.88265900  | 2.18544500  |
| C | -6.80586100 | -2.01040300  | 2.10018500  |
| H | -7.45284400 | 0.03795700   | 2.09266300  |
| C | 2.23312900  | -1.37566100  | 0.21764800  |
| C | 3.22456000  | -2.05015900  | 0.39247800  |
| C | 6.84104300  | -2.77525300  | 0.87853500  |
| C | 6.85560100  | -4.16446800  | 0.86563000  |
| C | 5.65857900  | -4.88131900  | 0.70852500  |
| C | 4.44048000  | -2.78682300  | 0.57265100  |
| C | 5.64364500  | -2.08251700  | 0.73195200  |
| H | 7.77098500  | -2.22811800  | 0.99449300  |
| C | 5.67049100  | -6.31304100  | 0.69468700  |
| C | 5.66214600  | -7.52511000  | 0.69955700  |
| C | 6.55405300  | -11.15376000 | 0.86983200  |
| C | 5.29307200  | -11.73370800 | 0.96299200  |
| C | 4.14887500  | -10.92209500 | 0.95273000  |
| C | 5.55873300  | -8.95282100  | 0.76074600  |
| C | 6.69595900  | -9.77259100  | 0.77747600  |
| H | 7.43679000  | -11.78426300 | 0.87428100  |
| C | 1.68583200  | -11.84291800 | 1.21105300  |
| C | 2.82993100  | -11.46466200 | 1.08181800  |
| C | -0.69019700 | -11.30544900 | 1.46639400  |
| C | -5.03173100 | -7.72549700  | 1.94115700  |
| C | -4.41807800 | -2.36905800  | 2.33862400  |
| C | 4.45018800  | -4.18747900  | 0.56314200  |

|    |             |              |             |
|----|-------------|--------------|-------------|
| C  | 4.28918900  | -9.53680700  | 0.83173100  |
| H  | -3.36503800 | -13.37768800 | 1.79539800  |
| H  | 0.79544300  | -14.36520200 | 1.34531000  |
| H  | -8.30099800 | -6.90100500  | 2.41523300  |
| H  | -6.49058000 | -10.79207300 | 2.16150100  |
| H  | -5.16451400 | 0.95122100   | 2.38778500  |
| H  | -7.80293300 | -2.41898100  | 1.97467000  |
| H  | 7.78836800  | -4.70688300  | 0.97619700  |
| H  | 5.62614200  | -0.99733800  | 0.72506300  |
| H  | 5.18523000  | -12.80957600 | 1.05003100  |
| H  | 7.68036200  | -9.32178400  | 0.71099000  |
| H  | -0.44648400 | -10.24961400 | 1.41034400  |
| H  | -4.06475400 | -7.26164100  | 1.76159200  |
| H  | -3.57463400 | -3.05172100  | 2.36953300  |
| H  | 3.52333000  | -4.73575800  | 0.42440200  |
| H  | 3.40336700  | -8.91335700  | 0.79521000  |
| C  | 0.71376700  | 2.75841000   | 2.98351700  |
| C  | -1.81048600 | 0.03599600   | 2.76186700  |
| C  | -2.90936300 | -0.44971200  | 2.60066600  |
| C  | 1.87922400  | 2.04177800   | 3.23490500  |
| C  | 1.83608800  | 0.64379200   | 3.35288600  |
| C  | -0.55034500 | 0.69377900   | 2.93148800  |
| C  | -0.49727800 | 2.09404700   | 2.84037100  |
| H  | 0.74967600  | 3.84030800   | 2.90110200  |
| C  | 0.61926900  | -0.02921500  | 3.19213000  |
| H  | 2.82726500  | 2.55499700   | 3.35846100  |
| H  | -1.41365300 | 2.64414400   | 2.65227800  |
| H  | 0.58263900  | -1.11112400  | 3.26955300  |
| C  | 3.03529600  | -0.07457500  | 3.67746500  |
| C  | 4.06166000  | -0.64432700  | 4.00269900  |
| Si | 5.58576900  | -1.48294000  | 4.63757500  |
| C  | 7.09384900  | -0.67007400  | 3.87033900  |
| C  | 5.45336400  | -3.30870600  | 4.23815400  |
| C  | 5.63203400  | -1.24020700  | 6.50008100  |
| H  | 7.20866500  | 0.34904900   | 4.25080900  |
| H  | 7.02605600  | -0.62252400  | 2.78172500  |
| H  | 7.99548400  | -1.23288600  | 4.13212900  |
| H  | 5.28235900  | -3.47844700  | 3.17132800  |
| H  | 4.61896700  | -3.74842700  | 4.79351200  |
| H  | 6.36785900  | -3.83687900  | 4.52695700  |
| H  | 4.75514400  | -1.68479800  | 6.97853400  |
| H  | 5.66352200  | -0.17819500  | 6.75875000  |
| H  | 6.52497000  | -1.71726100  | 6.91666900  |
| C  | 0.06196700  | -14.23951300 | -1.94460500 |
| C  | 1.25348300  | -13.53781000 | -2.08262900 |
| C  | 1.24403300  | -12.13414400 | -2.09117600 |
| C  | -1.16628000 | -12.15927900 | -1.81242400 |
| C  | -1.14529300 | -13.56144600 | -1.81150100 |
| H  | 0.07354400  | -15.32431100 | -1.93574700 |

|   |             |              |             |
|---|-------------|--------------|-------------|
| C | 2.46343800  | -11.39673200 | -2.23055800 |
| C | 3.48650700  | -10.75688500 | -2.34132600 |
| C | 7.08316000  | -9.79361800  | -2.61966600 |
| C | 6.98818100  | -8.40784000  | -2.66258800 |
| C | 5.72930200  | -7.78874100  | -2.60699800 |
| C | 4.67680900  | -9.96982400  | -2.45975000 |
| C | 5.93848200  | -10.57797900 | -2.51732500 |
| H | 8.05830400  | -10.26769400 | -2.65897900 |
| C | 5.61812700  | -6.36154300  | -2.63640800 |
| C | 5.51663000  | -5.15413800  | -2.64873000 |
| C | 6.47006800  | -1.55305900  | -2.52463700 |
| C | 5.23681000  | -0.93723200  | -2.69496600 |
| C | 4.07764500  | -1.71414100  | -2.85618700 |
| C | 5.41552000  | -3.72594900  | -2.66287300 |
| C | 6.56701200  | -2.94020200  | -2.51020500 |
| H | 7.36250300  | -0.94911100  | -2.39799100 |
| C | -2.41033800 | -0.78865400  | -0.65899200 |
| C | -3.50004100 | -1.28464700  | -0.84377000 |
| C | -7.15654300 | -1.88630900  | -1.31609800 |
| C | -7.19528900 | -3.27633900  | -1.32071100 |
| C | -6.00765400 | -4.01301400  | -1.18692100 |
| C | -4.75868500 | -1.94100600  | -1.03134300 |
| C | -5.94664900 | -1.21172600  | -1.17512400 |
| H | -8.07849100 | -1.32277600  | -1.41802400 |
| C | -6.01580000 | -5.44489700  | -1.20322600 |
| C | -5.98278600 | -6.65623000  | -1.22029700 |
| C | -7.10386200 | -10.21339300 | -1.21428600 |
| C | -5.89175500 | -10.88081300 | -1.33774600 |
| C | -4.69284900 | -10.15423200 | -1.41633600 |
| C | -5.94991200 | -8.08786100  | -1.25231000 |
| C | -7.14112100 | -8.82359300  | -1.17626900 |
| H | -8.02716600 | -10.77938200 | -1.14837800 |
| C | -2.40314400 | -11.45133400 | -1.67196100 |
| C | -3.44633000 | -10.84651300 | -1.55102500 |
| C | 0.03254700  | -11.45015000 | -1.95177900 |
| C | 4.57786500  | -8.57405600  | -2.50403300 |
| C | 4.16996900  | -3.10841800  | -2.83231300 |
| C | -4.79124100 | -3.34004300  | -1.03647900 |
| C | -4.72405500 | -8.75689500  | -1.36104600 |
| H | 2.19665900  | -14.06371600 | -2.18509800 |
| H | -2.07577900 | -14.10669800 | -1.69486800 |
| H | 7.88011700  | -7.79492900  | -2.73614000 |
| H | 6.01160900  | -11.65922500 | -2.47154200 |
| H | 5.15583900  | 0.14442200   | -2.71003000 |
| H | 7.52708900  | -3.42566100  | -2.37181700 |
| H | -8.13886800 | -3.79974600  | -1.43287700 |
| H | -5.91433200 | -0.12698100  | -1.15779600 |
| H | -5.85902700 | -11.96448800 | -1.37505500 |
| H | -8.08551900 | -8.29869300  | -1.07999200 |



|    |    |             |              |             |
|----|----|-------------|--------------|-------------|
|    | H  | 0.02129800  | -10.36549700 | -1.94648300 |
|    | H  | 3.60351700  | -8.10048000  | -2.44754700 |
|    | H  | 3.27626100  | -3.71326900  | -2.94392200 |
|    | H  | -3.87605700 | -3.90061400  | -0.88173300 |
|    | H  | -3.79850300 | -8.18971500  | -1.37835000 |
|    | C  | -0.29122800 | 2.61605400   | -3.58223300 |
|    | C  | 1.79060400  | -0.44213200  | -3.22390200 |
|    | C  | 2.81956400  | -1.05865900  | -3.05071200 |
|    | C  | -1.55239300 | 2.07736700   | -3.81395600 |
|    | C  | -1.72504400 | 0.68537400   | -3.86596700 |
|    | C  | 0.63968800  | 0.38661900   | -3.42225000 |
|    | C  | 0.80189500  | 1.78086300   | -3.39275300 |
|    | H  | -0.15772900 | 3.69291200   | -3.55793100 |
|    | C  | -0.62687800 | -0.15855700  | -3.66136200 |
|    | H  | -2.40810100 | 2.72482200   | -3.97449000 |
|    | H  | 1.79046100  | 2.19445100   | -3.22003900 |
|    | H  | -0.75839100 | -1.23504900  | -3.69600300 |
|    | C  | -3.01560800 | 0.14585800   | -4.18706500 |
|    | C  | -4.11055100 | -0.27371200  | -4.51706500 |
|    | Si | -5.72947000 | -0.89334600  | -5.16820000 |
|    | C  | -7.11587000 | 0.15271800   | -4.45777500 |
|    | C  | -5.89436300 | -2.70186500  | -4.70878900 |
|    | C  | -5.69818800 | -0.69495500  | -7.03660500 |
|    | H  | -7.00048400 | 1.19935700   | -4.75348600 |
|    | H  | -7.14367900 | 0.10345100   | -3.36714500 |
|    | H  | -8.07850000 | -0.20299000  | -4.83902200 |
|    | H  | -5.70582500 | -2.85465700  | -3.64315600 |
|    | H  | -5.17892200 | -3.30572200  | -5.27466400 |
|    | H  | -6.90153300 | -3.06641000  | -4.93413100 |
|    | H  | -4.88087500 | -1.26902900  | -7.48171900 |
|    | H  | -5.57550600 | 0.35381700   | -7.32090800 |
|    | H  | -6.63896900 | -1.05500500  | -7.46534400 |
|    | H  | -5.12432900 | -6.45818000  | 6.32646700  |
|    | H  | -5.34265200 | -5.58991500  | 4.79608100  |
|    | H  | -4.28053500 | -4.92850000  | 6.04517100  |
|    | H  | 4.46753200  | -5.78627600  | 3.58387500  |
|    | H  | 4.86719200  | -7.50414400  | 3.68735100  |
|    | H  | 3.73981600  | -6.78693900  | 4.85368600  |
| 4h | N  | -0.07776800 | -0.97084500  | -0.17136900 |
|    | C  | -0.27967000 | -2.43210600  | -0.12519300 |
|    | H  | 0.53489600  | -2.88456400  | 0.43327600  |
|    | H  | -0.29373600 | -2.83849000  | -1.13689900 |
|    | H  | -1.22712500 | -2.65272900  | 0.36554100  |
|    | O  | -0.65344100 | -5.24275800  | -0.35819400 |
|    | S  | -1.62931400 | -5.75533800  | 0.63948900  |
|    | O  | -2.09530300 | -7.13228800  | 0.33574800  |
|    | O  | -2.74267000 | -4.79915000  | 0.87991300  |
|    | C  | -0.73022700 | -5.85985900  | 2.21258500  |
|    | H  | -0.56054700 | -4.80872800  | 2.48572200  |

|   |             |              |             |
|---|-------------|--------------|-------------|
| C | -1.57046600 | -6.56450600  | 3.28274500  |
| H | -0.89591200 | -6.84100200  | 4.10388000  |
| H | -1.93400800 | -7.50990900  | 2.85539500  |
| C | -2.74000000 | -5.77416400  | 3.86597400  |
| H | -2.36517200 | -4.82948100  | 4.28729700  |
| C | -3.46683500 | -6.56102000  | 4.95486000  |
| H | -3.44403000 | -5.50081300  | 3.07280000  |
| H | -3.82926200 | -7.50604900  | 4.52796200  |
| C | -4.63851100 | -5.78798200  | 5.55412900  |
| H | -2.75544900 | -6.83271600  | 5.74618300  |
| C | 0.61411000  | -6.55886800  | 2.00199600  |
| H | 1.02155100  | -6.27022900  | 1.02763200  |
| H | 0.44337600  | -7.64356800  | 1.96807400  |
| C | 1.64887600  | -6.23604200  | 3.08037400  |
| H | 1.92756600  | -5.17469800  | 3.00866800  |
| C | 2.89045700  | -7.10605100  | 2.91502100  |
| H | 1.22877500  | -6.38060900  | 4.08413000  |
| H | 2.60594100  | -8.15815400  | 3.05129800  |
| C | 4.03862500  | -6.74967800  | 3.85069700  |
| H | 3.24227800  | -7.01055300  | 1.88129900  |
| C | 1.16319100  | -0.42318600  | -0.00775100 |
| C | 1.36367300  | 0.93949500   | -0.06399600 |
| H | 2.37226300  | 1.30151900   | 0.07574700  |
| C | 0.27427400  | 1.82099000   | -0.27392000 |
| N | 0.44044300  | 3.15191300   | -0.30833400 |
| C | -0.99857600 | 1.22416500   | -0.45637600 |
| H | -1.88353800 | 1.81092300   | -0.65714100 |
| C | -1.14008400 | -0.14554600  | -0.42520200 |
| C | 1.77704600  | 3.72406800   | -0.20939400 |
| C | -0.72223000 | 4.02625700   | -0.39334500 |
| H | 1.70716900  | 4.80298400   | -0.32871900 |
| H | 2.42517300  | 3.32975700   | -0.99806700 |
| H | 2.22962300  | 3.50632900   | 0.76427500  |
| H | -1.26983100 | 3.86185200   | -1.32684000 |
| H | -0.38827300 | 5.06084000   | -0.36447000 |
| H | -1.39886100 | 3.85290600   | 0.45003800  |
| C | -1.31372800 | -14.06417400 | 1.58872000  |
| C | -2.34228800 | -13.13579700 | 1.68864100  |
| C | -2.05920500 | -11.76105800 | 1.63804300  |
| C | 0.29776600  | -12.27393200 | 1.37329200  |
| C | 0.00297100  | -13.64302700 | 1.43502600  |
| H | -1.53925300 | -15.12473600 | 1.62698100  |
| C | -3.12509800 | -10.81128200 | 1.75273200  |
| C | -4.05498500 | -10.04006600 | 1.85344600  |
| C | -7.58040600 | -8.93778800  | 2.31614200  |
| C | -7.44600300 | -7.55493200  | 2.29256800  |
| C | -6.18199700 | -6.97422700  | 2.10720500  |
| C | -5.19391000 | -9.18064200  | 1.98572200  |
| C | -6.46306800 | -9.75147300  | 2.16953300  |

|   |             |              |            |
|---|-------------|--------------|------------|
| H | -8.55967400 | -9.38446700  | 2.45225500 |
| C | -6.03857800 | -5.55045500  | 2.09841600 |
| C | -5.88112300 | -4.34974500  | 2.11172900 |
| C | -6.52380900 | -0.67558200  | 2.15054200 |
| C | -5.23582300 | -0.18062200  | 2.30951100 |
| C | -4.14775300 | -1.06588500  | 2.39192100 |
| C | -5.66339900 | -2.93661600  | 2.15784800 |
| C | -6.74406800 | -2.04745800  | 2.08167700 |
| H | -7.36165700 | 0.01044300   | 2.08329400 |
| C | 2.27289800  | -1.29056200  | 0.22599200 |
| C | 3.26254100  | -1.96794300  | 0.39989900 |
| C | 6.86359200  | -2.75513100  | 0.88158600 |
| C | 6.85072200  | -4.14430000  | 0.86644200 |
| C | 5.64103100  | -4.84140300  | 0.71497600 |
| C | 4.46459400  | -2.72448300  | 0.58409300 |
| C | 5.67907400  | -2.03960800  | 0.74040900 |
| H | 7.80428500  | -2.22642500  | 0.99491100 |
| C | 5.63327800  | -6.27334900  | 0.70307100 |
| C | 5.61506900  | -7.48539300  | 0.70555600 |
| C | 6.51054000  | -11.11264200 | 0.86325900 |
| C | 5.25115800  | -11.69533800 | 0.95848600 |
| C | 4.10472700  | -10.88656600 | 0.95128200 |
| C | 5.50960400  | -8.91369100  | 0.76064800 |
| C | 6.64874900  | -9.73091100  | 0.77373500 |
| H | 7.39479200  | -11.74105600 | 0.86472800 |
| C | 1.64933900  | -11.82780000 | 1.21505200 |
| C | 2.78880900  | -11.43618600 | 1.08385400 |
| C | -0.73811400 | -11.33552900 | 1.47257700 |
| C | -5.05416700 | -7.78780200  | 1.93803900 |
| C | -4.35916200 | -2.44450700  | 2.30025700 |
| C | 4.44468800  | -4.12584400  | 0.57468700 |
| C | 4.24104800  | -9.50079000  | 0.83068100 |
| H | -3.37018000 | -13.46109000 | 1.80917400 |
| H | 0.80821700  | -14.36492600 | 1.35104800 |
| H | -8.31190200 | -6.91299600  | 2.41667400 |
| H | -6.55971600 | -10.83186900 | 2.19142900 |
| H | -5.05801900 | 0.88757100   | 2.37442000 |
| H | -7.74793000 | -2.44107000  | 1.96221500 |
| H | 7.77399500  | -4.70369800  | 0.97247200 |
| H | 5.68085800  | -0.95435900  | 0.73339600 |
| H | 5.14602800  | -12.77155400 | 1.04470400 |
| H | 7.63195700  | -9.27756600  | 0.70710200 |
| H | -0.51750200 | -10.27477100 | 1.41411600 |
| H | -4.07975800 | -7.34282400  | 1.74295200 |
| H | -3.52631500 | -3.14198400  | 2.31023300 |
| H | 3.50691100  | -4.65618400  | 0.44072400 |
| H | 3.35317800  | -8.88024700  | 0.79542400 |
| C | 0.75722700  | 2.70809900   | 2.96312600 |
| C | -1.73313800 | -0.04496600  | 2.73544300 |

|    |             |              |             |
|----|-------------|--------------|-------------|
| C  | -2.82786200 | -0.53908400  | 2.56934900  |
| C  | 1.93053200  | 2.00634200   | 3.22024700  |
| C  | 1.90304600  | 0.60801800   | 3.34274600  |
| C  | -0.48216400 | 0.62836600   | 2.90985800  |
| C  | -0.44555400 | 2.02918400   | 2.81482300  |
| H  | 0.77955500  | 3.79065100   | 2.88327100  |
| C  | 0.69489900  | -0.07955700  | 3.17983600  |
| H  | 2.87157800  | 2.53134100   | 3.34738000  |
| H  | -1.36791300 | 2.56852400   | 2.62354800  |
| H  | 0.67028100  | -1.16145800  | 3.26513500  |
| C  | 3.10675800  | -0.09760900  | 3.67617900  |
| C  | 4.13544000  | -0.65970500  | 4.00633200  |
| Si | 5.66142900  | -1.48709100  | 4.65246200  |
| C  | 7.16796300  | -0.66779600  | 3.88968000  |
| C  | 5.53523400  | -3.31335200  | 4.25564200  |
| C  | 5.69333800  | -1.23867500  | 6.51416900  |
| H  | 7.27561800  | 0.35260500   | 4.26871800  |
| H  | 7.10445100  | -0.62230200  | 2.80066900  |
| H  | 8.07144500  | -1.22528000  | 4.15611300  |
| H  | 5.36398900  | -3.48511300  | 3.18921800  |
| H  | 4.70102000  | -3.75265500  | 4.81136500  |
| H  | 6.45009000  | -3.84006200  | 4.54543700  |
| H  | 4.81486300  | -1.68622400  | 6.98696700  |
| H  | 5.71778200  | -0.17589200  | 6.77022600  |
| H  | 6.58521400  | -1.71060500  | 6.93863500  |
| C  | 0.06460400  | -14.23981200 | -1.94569700 |
| C  | 1.25322100  | -13.53327800 | -2.08453300 |
| C  | 1.23830200  | -12.12965800 | -2.09109700 |
| C  | -1.17168100 | -12.16468200 | -1.80952200 |
| C  | -1.14518200 | -13.56665700 | -1.81040800 |
| H  | 0.08049700  | -15.32457400 | -1.93817000 |
| C  | 2.45497200  | -11.38760700 | -2.23099900 |
| C  | 3.47583800  | -10.74426800 | -2.34242500 |
| C  | 7.07021900  | -9.77366200  | -2.62563200 |
| C  | 6.97303600  | -8.38789500  | -2.66359100 |
| C  | 5.71326100  | -7.77099600  | -2.60404900 |
| C  | 4.66409600  | -9.95398700  | -2.46145600 |
| C  | 5.92677600  | -10.55985600 | -2.52387300 |
| H  | 8.04592300  | -10.24621000 | -2.66869700 |
| C  | 5.60042700  | -6.34384000  | -2.63088600 |
| C  | 5.49770300  | -5.13658100  | -2.64270500 |
| C  | 6.44710600  | -1.53379700  | -2.52094200 |
| C  | 5.21311500  | -0.91930600  | -2.68996600 |
| C  | 4.05513000  | -1.69845800  | -2.84931800 |
| C  | 5.39468000  | -3.70858200  | -2.65659600 |
| C  | 6.54516100  | -2.92100700  | -2.50558500 |
| H  | 7.33926500  | -0.92912500  | -2.39603800 |
| C  | -2.40633300 | -0.75119000  | -0.66974600 |
| C  | -3.48580900 | -1.26889400  | -0.85721500 |

|   |             |              |             |
|---|-------------|--------------|-------------|
| C | -7.13085600 | -1.88772800  | -1.34878700 |
| C | -7.16338700 | -3.27804900  | -1.34594700 |
| C | -5.97603700 | -4.01262500  | -1.19810900 |
| C | -4.73627300 | -1.93741600  | -1.04947000 |
| C | -5.92382600 | -1.20950500  | -1.20753400 |
| H | -8.05431300 | -1.32857900  | -1.45912700 |
| C | -5.98986400 | -5.44480500  | -1.21032900 |
| C | -5.96877100 | -6.65644300  | -1.22327300 |
| C | -7.11194000 | -10.20783100 | -1.22776800 |
| C | -5.90291300 | -10.88165700 | -1.34808700 |
| C | -4.69987000 | -10.16120000 | -1.41743500 |
| C | -5.94645400 | -8.08875900  | -1.25511400 |
| C | -7.14223800 | -8.81768200  | -1.18704000 |
| H | -8.03857100 | -10.76896000 | -1.16761800 |
| C | -2.41085800 | -11.46090800 | -1.66861200 |
| C | -3.45459600 | -10.85669500 | -1.54955500 |
| C | 0.02430100  | -11.45061300 | -1.94887000 |
| C | 4.56293800  | -8.55821000  | -2.50157400 |
| C | 4.14807900  | -3.09261300  | -2.82473500 |
| C | -4.76100200 | -3.33753500  | -1.03790200 |
| C | -4.72372000 | -8.76415900  | -1.35656400 |
| H | 2.19825200  | -14.05546400 | -2.18906700 |
| H | -2.07338900 | -14.11576400 | -1.69377500 |
| H | 7.86391100  | -7.77342800  | -2.73713100 |
| H | 6.00161300  | -11.64114300 | -2.48188500 |
| H | 5.13074400  | 0.16219500   | -2.70612800 |
| H | 7.50608100  | -3.40517500  | -2.36843800 |
| H | -8.10474100 | -3.80469500  | -1.46224500 |
| H | -5.89248600 | -0.12466000  | -1.20012200 |
| H | -5.87631600 | -11.96541500 | -1.38917300 |
| H | -8.08453200 | -8.28819800  | -1.09493500 |
| H | 0.00872500  | -10.36604600 | -1.94132000 |
| H | 3.58806600  | -8.08614200  | -2.44154300 |
| H | 3.25502900  | -3.69836700  | -2.93620200 |
| H | -3.84896000 | -3.89625300  | -0.85158600 |
| H | -3.79535400 | -8.20143200  | -1.35764200 |
| C | -0.31902000 | 2.62603000   | -3.58139500 |
| C | 1.76681100  | -0.42900000  | -3.21600700 |
| C | 2.79635300  | -1.04449500  | -3.04267200 |
| C | -1.58036700 | 2.08481500   | -3.80825600 |
| C | -1.75080500 | 0.69228400   | -3.85673400 |
| C | 0.61528700  | 0.39842400   | -3.41507300 |
| C | 0.77612700  | 1.79326200   | -3.39077100 |
| H | -0.18628200 | 3.70319000   | -3.56521400 |
| C | -0.65090600 | -0.14944400  | -3.65160200 |
| H | -2.43686700 | 2.73066300   | -3.97061800 |
| H | 1.76515800  | 2.20903600   | -3.22553200 |
| H | -0.78004700 | -1.22626200  | -3.68763900 |
| C | -3.03891900 | 0.14871900   | -4.17935400 |

|     |    |             |             |             |
|-----|----|-------------|-------------|-------------|
|     | C  | -4.13134500 | -0.27377400 | -4.51346000 |
|     | Si | -5.74399400 | -0.89637400 | -5.17948400 |
|     | C  | -7.13803000 | 0.14200600  | -4.47302600 |
|     | C  | -5.89901200 | -2.70885300 | -4.73284900 |
|     | C  | -5.70015300 | -0.68577800 | -7.04606200 |
|     | H  | -7.02439400 | 1.18964500  | -4.76597000 |
|     | H  | -7.17239500 | 0.09107400  | -3.38280400 |
|     | H  | -8.09718900 | -0.21601200 | -4.86064600 |
|     | H  | -5.70623500 | -2.86989600 | -3.66927000 |
|     | H  | -5.18122800 | -3.30362000 | -5.30526200 |
|     | H  | -6.90446600 | -3.07762300 | -4.95867000 |
|     | H  | -4.87764200 | -1.25390200 | -7.48912700 |
|     | H  | -5.58018700 | 0.36518600  | -7.32317700 |
|     | H  | -6.63663400 | -1.04723000 | -7.48299800 |
|     | H  | -5.14687900 | -6.36316400 | 6.33300400  |
|     | H  | -5.37035700 | -5.54017600 | 4.77867600  |
|     | H  | -4.29583600 | -4.84817900 | 6.00011800  |
|     | H  | 4.42716900  | -5.75275700 | 3.61987000  |
|     | H  | 4.86449700  | -7.45924000 | 3.74443400  |
|     | H  | 3.71676200  | -6.75496100 | 4.89779300  |
| 3a' | O  | 0.32920800  | -4.89419600 | -0.86788900 |
|     | C  | 0.11025400  | -3.48126000 | -0.61941200 |
|     | H  | 0.38429300  | -3.21910000 | 0.40421500  |
|     | H  | 0.77442600  | -2.96548900 | -1.30883800 |
|     | H  | -0.92916800 | -3.21737100 | -0.81325400 |
|     | N  | -0.07623400 | -0.62224800 | -0.17065200 |
|     | S  | -0.51918200 | -5.93114300 | 0.00869300  |
|     | O  | -0.43613600 | -7.19065700 | -0.70576000 |
|     | O  | -1.82246200 | -5.35233500 | 0.29943900  |
|     | C  | 0.42342600  | -6.03784900 | 1.50632500  |
|     | H  | 0.46592200  | -5.05297700 | 1.97176600  |
|     | H  | 1.42035000  | -6.39871300 | 1.25525800  |
|     | H  | -0.08949300 | -6.74258200 | 2.16125900  |
|     | C  | 1.09786400  | 0.01053100  | -0.01806500 |
|     | C  | 1.25985500  | 1.39168100  | -0.04596800 |
|     | H  | 2.24915100  | 1.80780000  | 0.08780100  |
|     | C  | 0.12849300  | 2.21339900  | -0.25235700 |
|     | N  | 0.22704600  | 3.56635400  | -0.29411900 |
|     | C  | -1.10961900 | 1.55173300  | -0.41539500 |
|     | H  | -2.02935600 | 2.09651600  | -0.57997100 |
|     | C  | -1.14807000 | 0.16136200  | -0.36555700 |
|     | C  | 1.52363400  | 4.20246100  | -0.13504600 |
|     | C  | -0.96158100 | 4.37218700  | -0.51476000 |
|     | H  | 1.40034600  | 5.28112600  | -0.21135700 |
|     | H  | 2.22378300  | 3.88040100  | -0.91418000 |
|     | H  | 1.96313300  | 3.97443600  | 0.84260600  |
|     | H  | -1.42665800 | 4.14238400  | -1.48024400 |
|     | H  | -0.68166300 | 5.42393400  | -0.51191100 |
|     | H  | -1.70424100 | 4.21218100  | 0.27482000  |

|       |   |             |             |             |
|-------|---|-------------|-------------|-------------|
|       | C | 2.23154100  | -0.85637300 | 0.17997100  |
|       | C | 3.12799600  | -1.65460800 | 0.34231300  |
|       | C | 6.40040400  | -3.26086400 | 1.15166500  |
|       | C | 6.10827700  | -4.59878900 | 0.89050600  |
|       | C | 4.83780100  | -4.96123700 | 0.44440300  |
|       | C | 4.14831700  | -2.64370100 | 0.52540000  |
|       | C | 5.42777100  | -2.28385100 | 0.97136000  |
|       | H | 7.38885300  | -2.97688500 | 1.49707500  |
|       | H | 4.60908700  | -6.00167600 | 0.23758400  |
|       | C | 3.85913600  | -3.99180000 | 0.26073400  |
|       | H | 6.87005300  | -5.35808600 | 1.03288400  |
|       | H | 5.64754600  | -1.24107500 | 1.17457500  |
|       | H | 2.86934800  | -4.26770400 | -0.09200200 |
|       | C | -2.39601400 | -0.53977900 | -0.52634200 |
|       | C | -3.41323900 | -1.18561600 | -0.65130400 |
|       | C | -6.96179700 | -2.18006100 | -1.24310500 |
|       | C | -6.88108800 | -3.56077500 | -1.06768500 |
|       | C | -5.65889900 | -4.15367100 | -0.75382200 |
|       | C | -4.59482900 | -1.98404800 | -0.79187800 |
|       | C | -5.82585800 | -1.39078600 | -1.10668700 |
|       | H | -7.91228300 | -1.71668100 | -1.48610600 |
|       | H | -5.59430900 | -5.22808900 | -0.61622600 |
|       | C | -4.51652800 | -3.37432100 | -0.61459200 |
|       | H | -7.77026200 | -4.17361600 | -1.17425500 |
|       | H | -5.88030400 | -0.31577500 | -1.24230600 |
|       | H | -3.56364200 | -3.83309800 | -0.36610600 |
| TS-a' | O | 0.34213800  | -4.65181300 | -0.62934700 |
|       | C | 0.12698400  | -2.80341800 | -0.41347300 |
|       | H | 0.59224400  | -2.81092500 | 0.56010300  |
|       | H | 0.74504400  | -2.67160400 | -1.28727100 |
|       | H | -0.94810900 | -2.85337200 | -0.50035600 |
|       | N | 0.03997800  | -0.78293100 | -0.26682100 |
|       | S | -0.55351500 | -5.56124400 | 0.20999200  |
|       | O | -0.62867700 | -6.89269200 | -0.39665600 |
|       | O | -1.83831600 | -4.90467300 | 0.49947200  |
|       | C | 0.30815300  | -5.72441600 | 1.75870500  |
|       | H | 0.41830200  | -4.73553500 | 2.20498500  |
|       | H | 1.28549000  | -6.16756700 | 1.56738200  |
|       | H | -0.28168100 | -6.36743100 | 2.41184300  |
|       | C | 1.19433600  | -0.11183400 | -0.08037900 |
|       | C | 1.27727400  | 1.27108500  | -0.04381200 |
|       | H | 2.24546900  | 1.72573100  | 0.11289000  |
|       | C | 0.10367700  | 2.04533100  | -0.20909700 |
|       | N | 0.13357900  | 3.39497500  | -0.18624000 |
|       | C | -1.10219500 | 1.32932800  | -0.39725900 |
|       | H | -2.04992400 | 1.83278000  | -0.52790000 |
|       | C | -1.08427500 | -0.05888100 | -0.41813900 |
|       | C | 1.39851400  | 4.09101300  | -0.00354500 |
|       | C | -1.09928600 | 4.15163400  | -0.34510000 |

|     |   |             |             |             |
|-----|---|-------------|-------------|-------------|
|     | H | 1.21888200  | 5.16334900  | -0.04044900 |
|     | H | 2.10871800  | 3.83304600  | -0.79613800 |
|     | H | 1.84918900  | 3.84881100  | 0.96494800  |
|     | H | -1.56178900 | 3.95697900  | -1.31868300 |
|     | H | -0.87207900 | 5.21356000  | -0.27886700 |
|     | H | -1.81918800 | 3.90312400  | 0.44181400  |
|     | C | 2.36591700  | -0.92426300 | 0.08896800  |
|     | C | 3.28580600  | -1.69879400 | 0.23052400  |
|     | C | 6.58989200  | -3.31966200 | 0.85738900  |
|     | C | 6.24650200  | -4.66307000 | 0.71341800  |
|     | C | 4.93396800  | -5.02270200 | 0.40769900  |
|     | C | 4.30595700  | -2.69001300 | 0.39226300  |
|     | C | 5.62564800  | -2.33096600 | 0.69823400  |
|     | H | 7.61134200  | -3.04186700 | 1.09478700  |
|     | H | 4.66836500  | -6.06860800 | 0.29464300  |
|     | C | 3.96138700  | -4.04342600 | 0.24606700  |
|     | H | 7.00265900  | -5.43086700 | 0.83964100  |
|     | H | 5.88249800  | -1.28293800 | 0.80963000  |
|     | H | 2.93547300  | -4.31046600 | 0.00414100  |
|     | C | -2.31119500 | -0.78162500 | -0.60282500 |
|     | C | -3.35292200 | -1.38232200 | -0.74816300 |
|     | C | -6.93088000 | -2.10122400 | -1.49453200 |
|     | C | -6.97941600 | -3.47577200 | -1.26490800 |
|     | C | -5.83178100 | -4.15872600 | -0.86413600 |
|     | C | -4.58326500 | -2.09442000 | -0.92295900 |
|     | C | -5.73882700 | -1.40812200 | -1.32489600 |
|     | H | -7.82332500 | -1.56846600 | -1.80555700 |
|     | H | -5.87131200 | -5.22810900 | -0.68480900 |
|     | C | -4.63196700 | -3.47763900 | -0.69129800 |
|     | H | -7.91235600 | -4.01370900 | -1.39824800 |
|     | H | -5.69072700 | -0.33872200 | -1.50101400 |
|     | H | -3.73318100 | -4.00040700 | -0.37496500 |
| 4a' | O | 0.81587600  | -4.96048500 | -1.03948800 |
|     | C | -0.12122000 | -2.16091200 | -0.17770000 |
|     | H | 0.15239200  | -2.50174600 | 0.82214800  |
|     | H | 0.57414400  | -2.58443200 | -0.89939600 |
|     | H | -1.12559200 | -2.49572500 | -0.40636800 |
|     | N | -0.06015600 | -0.68917800 | -0.22034900 |
|     | S | -0.21071100 | -5.66408600 | -0.22903500 |
|     | O | -0.48139600 | -7.03909000 | -0.69954400 |
|     | O | -1.44258500 | -4.86022900 | -0.03410900 |
|     | C | 0.51239900  | -5.83596800 | 1.39634700  |
|     | H | 0.74416700  | -4.84426800 | 1.78730800  |
|     | H | 1.42771600  | -6.42312000 | 1.31177300  |
|     | H | -0.19858300 | -6.33998200 | 2.05126300  |
|     | C | 1.14911500  | -0.06939800 | -0.05236000 |
|     | C | 1.26995300  | 1.30130600  | -0.07605500 |
|     | H | 2.25602200  | 1.71954100  | 0.06410000  |
|     | C | 0.12859500  | 2.12090900  | -0.27903100 |



|     |   |             |             |             |
|-----|---|-------------|-------------|-------------|
|     | N | 0.21709200  | 3.45653400  | -0.31188700 |
|     | C | -1.11129900 | 1.45034100  | -0.44418700 |
|     | H | -2.03354800 | 1.99014600  | -0.60190700 |
|     | C | -1.17947300 | 0.07448400  | -0.40922100 |
|     | C | 1.51238500  | 4.10873900  | -0.14919700 |
|     | C | -0.98106600 | 4.26447500  | -0.51409300 |
|     | H | 1.37524700  | 5.18440100  | -0.22856400 |
|     | H | 2.20955200  | 3.78955800  | -0.92949700 |
|     | H | 1.94342200  | 3.88394000  | 0.83107300  |
|     | H | -1.44230900 | 4.04454900  | -1.48168400 |
|     | H | -0.70249700 | 5.31523800  | -0.49485200 |
|     | H | -1.71163500 | 4.08447600  | 0.28003000  |
|     | C | 2.27166800  | -0.92029900 | 0.15136400  |
|     | C | 3.15814700  | -1.72794900 | 0.32170500  |
|     | C | 6.38027000  | -3.40560300 | 1.15326800  |
|     | C | 6.04556200  | -4.73615800 | 0.90383200  |
|     | C | 4.76630700  | -5.06769800 | 0.45778500  |
|     | C | 4.15202500  | -2.73677600 | 0.51548600  |
|     | C | 5.43841900  | -2.40223500 | 0.96087000  |
|     | H | 7.37643800  | -3.14992300 | 1.49803000  |
|     | H | 4.51054200  | -6.10364200 | 0.26067900  |
|     | C | 3.81278300  | -4.07571800 | 0.25996300  |
|     | H | 6.78486600  | -5.51579600 | 1.05557800  |
|     | H | 5.68599000  | -1.36394900 | 1.15379900  |
|     | H | 2.81377700  | -4.32242600 | -0.09638000 |
|     | C | -2.42443100 | -0.60007300 | -0.56473300 |
|     | C | -3.45628200 | -1.22253600 | -0.68531400 |
|     | C | -7.00376800 | -2.26316100 | -1.15713000 |
|     | C | -6.87645500 | -3.64883500 | -1.06868100 |
|     | C | -5.62571200 | -4.22769800 | -0.85411800 |
|     | C | -4.62607900 | -2.03372700 | -0.81674400 |
|     | C | -5.88323100 | -1.45142900 | -1.03224900 |
|     | H | -7.97752000 | -1.81483500 | -1.32283700 |
|     | H | -5.53059300 | -5.30613500 | -0.78530200 |
|     | C | -4.49542000 | -3.42941000 | -0.72667500 |
|     | H | -7.75448400 | -4.27909700 | -1.16559800 |
|     | H | -5.96954900 | -0.37228900 | -1.09968100 |
|     | H | -3.51617700 | -3.87242100 | -0.55733600 |
| 3b' | N | -0.13740000 | -0.75535000 | -0.24130200 |
|     | C | -0.02791700 | -3.60008800 | -0.79272200 |
|     | H | 0.24850600  | -3.35596600 | 0.23471100  |
|     | H | 0.65790300  | -3.10085200 | -1.47408600 |
|     | H | -1.05731400 | -3.30019700 | -0.99007900 |
|     | O | 0.14433000  | -5.01813000 | -1.05258400 |
|     | S | -0.75284300 | -6.03053800 | -0.19130400 |
|     | O | -0.73036000 | -7.28346100 | -0.92593100 |
|     | O | -2.03235500 | -5.39871000 | 0.10586300  |
|     | C | 0.18238900  | -6.20844800 | 1.31582500  |
|     | H | 0.30381200  | -5.20539800 | 1.73561300  |

|   |             |             |             |
|---|-------------|-------------|-------------|
| H | 1.16144300  | -6.59414800 | 1.01752300  |
| C | -0.53766400 | -7.14232200 | 2.28719500  |
| H | -1.52864400 | -6.73296700 | 2.50565200  |
| C | 0.26590100  | -7.30128300 | 3.57467700  |
| H | -0.68203500 | -8.11498200 | 1.80666300  |
| H | 1.25349200  | -7.72406600 | 3.36964600  |
| H | -0.25227200 | -7.96754300 | 4.26803500  |
| H | 0.40534500  | -6.33632800 | 4.07037700  |
| C | 1.04604100  | -0.16169900 | -0.01880000 |
| C | 1.23365800  | 1.21312200  | 0.08031900  |
| H | 2.22898500  | 1.59674000  | 0.25956800  |
| C | 0.11942800  | 2.07169600  | -0.05795500 |
| N | 0.24184400  | 3.42048600  | 0.03178600  |
| C | -1.12861400 | 1.45143300  | -0.29275300 |
| H | -2.03762600 | 2.02638800  | -0.40772200 |
| C | -1.19274000 | 0.06329300  | -0.37207300 |
| C | 1.54177900  | 4.01286800  | 0.29686500  |
| C | -0.93021100 | 4.26527800  | -0.12147400 |
| H | 1.43218500  | 5.09391200  | 0.35823300  |
| H | 2.25607100  | 3.78336500  | -0.50194300 |
| H | 1.95572800  | 3.65469300  | 1.24609600  |
| H | -1.39721100 | 4.12247400  | -1.10233800 |
| H | -0.62858400 | 5.30764300  | -0.03589400 |
| H | -1.67781900 | 4.05739600  | 0.65259100  |
| C | 2.15954100  | -1.06496800 | 0.12137900  |
| C | 3.03860500  | -1.89045100 | 0.23611800  |
| C | 6.29130300  | -3.58408400 | 0.93600300  |
| C | 5.97248900  | -4.90560700 | 0.62725300  |
| C | 4.69010700  | -5.22912000 | 0.18498200  |
| C | 4.04199700  | -2.90524000 | 0.36487000  |
| C | 5.33327500  | -2.58470900 | 0.80696800  |
| H | 7.28899300  | -3.33088900 | 1.27902700  |
| H | 4.44080000  | -6.25699300 | -0.05752800 |
| C | 3.72557100  | -4.23692900 | 0.05229900  |
| H | 6.72296200  | -5.68246500 | 0.73121700  |
| H | 5.57326200  | -1.55432500 | 1.04702700  |
| H | 2.72603600  | -4.48212900 | -0.29602600 |
| C | -2.45286400 | -0.59554300 | -0.60225900 |
| C | -3.48411100 | -1.20413900 | -0.78528300 |
| C | -7.03751000 | -2.03772700 | -1.56135400 |
| C | -7.02417400 | -3.42313400 | -1.40496100 |
| C | -5.84450400 | -4.07308300 | -1.04368600 |
| C | -4.68839700 | -1.95150300 | -0.99558400 |
| C | -5.87693500 | -1.30078100 | -1.35799100 |
| H | -7.95442100 | -1.52997100 | -1.84226800 |
| H | -5.83269400 | -5.15122600 | -0.92117500 |
| C | -4.67755600 | -3.34641500 | -0.83828600 |
| H | -7.93234200 | -3.99494400 | -1.56535200 |
| H | -5.87883700 | -0.22253100 | -1.47817900 |

|       |            |             |             |             |
|-------|------------|-------------|-------------|-------------|
|       | H          | -3.75722600 | -3.84920200 | -0.55428800 |
| TS-b' | N          | -0.04761600 | -0.87613600 | -0.29370700 |
|       | C          | -0.01903300 | -2.88642800 | -0.56749900 |
|       | H          | 0.42951900  | -2.97021800 | 0.41013500  |
|       | H          | 0.61560000  | -2.71948600 | -1.42336500 |
|       | H          | -1.09332900 | -2.89532400 | -0.67027200 |
|       | O          | 0.13753100  | -4.72464800 | -0.89957200 |
|       | S          | -0.76068300 | -5.65851700 | -0.08789600 |
|       | O          | -0.97457400 | -6.91499100 | -0.81481700 |
|       | O          | -1.97720200 | -4.95642500 | 0.35714700  |
|       | C          | 0.19800400  | -6.03467200 | 1.37324100  |
|       | H          | 0.44926200  | -5.07580400 | 1.83859300  |
|       | H          | 1.12294400  | -6.50032500 | 1.01898100  |
|       | C          | -0.56279300 | -6.94185600 | 2.33321000  |
|       | H          | -1.49316800 | -6.44497500 | 2.62527400  |
|       | C          | 0.27439700  | -7.26841100 | 3.56688600  |
|       | H          | -0.83794000 | -7.86114900 | 1.80644300  |
|       | H          | 1.19952800  | -7.78078500 | 3.28723600  |
|       | H          | -0.27830000 | -7.91708600 | 4.25042100  |
|       | H          | 0.54461600  | -6.35732800 | 4.10878200  |
|       | C          | 1.12240200  | -0.25355100 | -0.04665500 |
|       | C          | 1.24352700  | 1.12038200  | 0.08750600  |
|       | H          | 2.22210000  | 1.53598100  | 0.28355900  |
|       | C          | 0.09428800  | 1.93781400  | -0.03638100 |
|       | N          | 0.16173200  | 3.28090700  | 0.08540100  |
|       | C          | -1.12846600 | 1.27232800  | -0.29056100 |
|       | H          | -2.06015900 | 1.81126200  | -0.39279000 |
|       | C          | -1.14900800 | -0.11086000 | -0.40807700 |
|       | C          | 1.43840800  | 3.92135900  | 0.36418100  |
|       | C          | -1.04459300 | 4.08369900  | -0.04901200 |
|       | H          | 1.28462000  | 4.99557200  | 0.44112100  |
|       | H          | 2.16037400  | 3.73186200  | -0.43716700 |
|       | H          | 1.86097000  | 3.56435400  | 1.30933900  |
|       | H          | -1.49891900 | 3.95130000  | -1.03649900 |
|       | H          | -0.78507300 | 5.13342000  | 0.07129400  |
|       | H          | -1.78320700 | 3.82002000  | 0.71566400  |
|       | C          | 2.26664400  | -1.11108500 | 0.08182700  |
| C     | 3.15705100 | -1.92505800 | 0.18646200  |             |
| C     | 6.38815400 | -3.69683200 | 0.78288600  |             |
| C     | 6.00761300 | -5.01420300 | 0.53113000  |             |
| C     | 4.69456100 | -5.30635500 | 0.16230400  |             |
| C     | 4.14055600 | -2.95878200 | 0.30102500  |             |
| C     | 5.46074000 | -2.66753000 | 0.66990400  |             |
| H     | 7.41016300 | -3.47079200 | 1.06807400  |             |
| H     | 4.39975300 | -6.33179100 | -0.03518100 |             |
| C     | 3.75862800 | -4.28584900 | 0.04549200  |             |
| H     | 6.73541900 | -5.81378100 | 0.62232700  |             |
| H     | 5.74659100 | -1.63962300 | 0.86616500  |             |
| H     | 2.73258300 | -4.50050100 | -0.24416600 |             |

|     |   |             |             |              |
|-----|---|-------------|-------------|--------------|
|     | C | -2.39114400 | -0.78795200 | -0.65368100  |
|     | C | -3.43883700 | -1.36409500 | -0.84737800  |
|     | C | -6.99699200 | -2.04333400 | -1.72228200  |
|     | C | -7.06086300 | -3.42115000 | -1.51748600  |
|     | C | -5.93083000 | -4.11815100 | -1.09165700  |
|     | C | -4.66936200 | -2.06082600 | -1.07559800  |
|     | C | -5.80699500 | -1.36043100 | -1.50291300  |
|     | H | -7.87604600 | -1.50000100 | -2.05259100  |
|     | H | -5.98235800 | -5.19013200 | -0.93187800  |
|     | C | -4.73336000 | -3.44756100 | -0.86899600  |
|     | H | -7.99209700 | -3.95088400 | -1.68983400  |
|     | H | -5.74701600 | -0.28856900 | -1.65940600  |
|     | H | -3.84801800 | -3.98122000 | -0.53249000v |
| 4b' | N | 0.00585300  | -0.92935700 | -0.28399500  |
|     | C | -0.00734400 | -2.38857600 | -0.49025200  |
|     | H | 0.51782900  | -2.87089300 | 0.33226500   |
|     | H | 0.50841300  | -2.63275500 | -1.41844100  |
|     | H | -1.02842500 | -2.75304100 | -0.52528900  |
|     | O | 0.67861900  | -5.18919500 | -0.96750100  |
|     | S | -0.44609200 | -5.84317300 | -0.25005600  |
|     | O | -0.67974200 | -7.23924000 | -0.68300500  |
|     | O | -1.68461300 | -5.02068000 | -0.24503900  |
|     | C | 0.08469800  | -5.93306600 | 1.46202000   |
|     | H | 0.30232100  | -4.90647700 | 1.77582500   |
|     | H | 1.02483600  | -6.49443300 | 1.46230900   |
|     | C | -0.95473700 | -6.58111900 | 2.36641600   |
|     | H | -1.88404800 | -6.00535300 | 2.30200900   |
|     | C | -0.47593300 | -6.65526600 | 3.81422900   |
|     | H | -1.17215600 | -7.58442700 | 1.98554900   |
|     | H | 0.44452200  | -7.24212300 | 3.89195300   |
|     | H | -1.22926400 | -7.12088600 | 4.45473900   |
|     | H | -0.26956900 | -5.65599500 | 4.21044000   |
|     | C | 1.20208100  | -0.30554800 | -0.04801700  |
|     | C | 1.28652200  | 1.05573400  | 0.13317800   |
|     | H | 2.26430500  | 1.47670600  | 0.31641600   |
|     | C | 0.11974800  | 1.86273700  | 0.07718000   |
|     | N | 0.17248800  | 3.18926900  | 0.25063200   |
|     | C | -1.10425000 | 1.18867400  | -0.17117700  |
|     | H | -2.04340900 | 1.71935700  | -0.23032000  |
|     | C | -1.13523300 | -0.17852200 | -0.34518600  |
|     | C | 1.45133300  | 3.84291800  | 0.50880100   |
|     | C | -1.04986200 | 3.98391300  | 0.18767300   |
|     | H | 1.28390800  | 4.91203600  | 0.61241500   |
|     | H | 2.14773300  | 3.67770500  | -0.31737700  |
|     | H | 1.89963500  | 3.47032600  | 1.43574700   |
|     | H | -1.51986000 | 3.89824500  | -0.79688100  |
|     | H | -0.79905100 | 5.02786400  | 0.36395400   |
|     | H | -1.76249400 | 3.66356100  | 0.95430300   |
|     | C | 2.35074200  | -1.14419100 | 0.00671600   |

|     |   |             |             |             |
|-----|---|-------------|-------------|-------------|
|     | C | 3.25239300  | -1.95151600 | 0.05438600  |
|     | C | 6.54207500  | -3.66758300 | 0.41216100  |
|     | C | 6.15682900  | -4.99382600 | 0.21976400  |
|     | C | 4.82132800  | -5.30963300 | -0.02930800 |
|     | C | 4.25287100  | -2.97084900 | 0.10825900  |
|     | C | 5.59491500  | -2.65244100 | 0.35819600  |
|     | H | 7.58144200  | -3.42535600 | 0.60572400  |
|     | H | 4.52626800  | -6.34271000 | -0.18003600 |
|     | C | 3.86163000  | -4.30589100 | -0.08745300 |
|     | H | 6.90021600  | -5.78327900 | 0.26463400  |
|     | H | 5.88161300  | -1.61693900 | 0.50794800  |
|     | H | 2.81720700  | -4.54062900 | -0.28728600 |
|     | C | -2.36743600 | -0.84879000 | -0.59478000 |
|     | C | -3.40939600 | -1.42939800 | -0.80504200 |
|     | C | -6.97268900 | -2.24051900 | -1.52869600 |
|     | C | -6.91730400 | -3.63350300 | -1.56231700 |
|     | C | -5.70936000 | -4.29418900 | -1.34174300 |
|     | C | -4.60764600 | -2.16844500 | -1.05817800 |
|     | C | -5.82226900 | -1.50320900 | -1.27736100 |
|     | H | -7.91371800 | -1.72863200 | -1.69952100 |
|     | H | -5.67064400 | -5.37801000 | -1.36725500 |
|     | C | -4.54963200 | -3.57121100 | -1.08878100 |
|     | H | -7.81822300 | -4.20471300 | -1.76113200 |
|     | H | -5.85259700 | -0.41927400 | -1.24996400 |
|     | H | -3.60307900 | -4.07578600 | -0.91004800 |
| 3c' | N | -0.21143700 | -0.73986800 | -0.16732900 |
|     | C | -0.19059400 | -3.52948600 | -0.89554700 |
|     | H | 0.08453700  | -3.36802500 | 0.14818600  |
|     | H | 0.50473800  | -2.98992900 | -1.53433600 |
|     | H | -1.21370800 | -3.19740600 | -1.07115600 |
|     | O | -0.04219500 | -4.92564700 | -1.26427200 |
|     | S | -0.90671700 | -5.99152600 | -0.43534900 |
|     | O | -0.95222500 | -7.18099400 | -1.26647000 |
|     | O | -2.15350400 | -5.36643000 | -0.01285300 |
|     | C | 0.11823200  | -6.30222200 | 0.99007800  |
|     | H | 0.28945200  | -5.33721700 | 1.47630400  |
|     | H | 1.06684200  | -6.67745600 | 0.59534800  |
|     | C | -0.55026600 | -7.30108900 | 1.93071800  |
|     | H | -1.50477400 | -6.88873600 | 2.27506000  |
|     | C | 0.34715300  | -7.61424400 | 3.12652200  |
|     | H | -0.76989400 | -8.22260800 | 1.38008500  |
|     | H | 1.30404400  | -8.01524200 | 2.76783100  |
|     | C | -0.29401800 | -8.61260300 | 4.08782800  |
|     | H | 0.57836800  | -6.68566000 | 3.66430100  |
|     | H | -1.24617100 | -8.20460400 | 4.44837500  |
|     | C | 0.61127200  | -8.93822700 | 5.27233900  |
|     | H | -0.53689400 | -9.53221200 | 3.54162300  |
|     | H | 1.55675800  | -9.37167300 | 4.93122300  |
|     | H | 0.13965800  | -9.65224800 | 5.95217100  |

|       |   |             |             |             |
|-------|---|-------------|-------------|-------------|
|       | H | 0.84645800  | -8.03447700 | 5.84311000  |
|       | C | 0.97888400  | -0.19014300 | 0.12019900  |
|       | C | 1.19746400  | 1.17260500  | 0.29263900  |
|       | H | 2.19553600  | 1.52076400  | 0.52205900  |
|       | C | 0.10947500  | 2.06575500  | 0.16061700  |
|       | N | 0.26150100  | 3.40534600  | 0.31734600  |
|       | C | -1.14572800 | 1.49086100  | -0.14205100 |
|       | H | -2.03612000 | 2.09413800  | -0.25650900 |
|       | C | -1.24159600 | 0.11084600  | -0.29101400 |
|       | C | 1.56691500  | 3.95258300  | 0.64478700  |
|       | C | -0.88390100 | 4.28629500  | 0.16472000  |
|       | H | 1.48149200  | 5.03264700  | 0.74835300  |
|       | H | 2.29912000  | 3.73853200  | -0.14192500 |
|       | H | 1.94371600  | 3.54569900  | 1.58985700  |
|       | H | -1.32362000 | 4.19707000  | -0.83480100 |
|       | H | -0.55929800 | 5.31564100  | 0.30454300  |
|       | H | -1.66018900 | 4.06558200  | 0.90625500  |
|       | C | 2.06023100  | -1.13465800 | 0.24416600  |
|       | C | 2.89820300  | -2.00539700 | 0.32807500  |
|       | C | 6.00042300  | -3.96080700 | 1.04241400  |
|       | C | 5.62969000  | -5.21988000 | 0.57307900  |
|       | C | 4.36435400  | -5.41332200 | 0.01970900  |
|       | C | 3.83777800  | -3.08419800 | 0.41071800  |
|       | C | 5.11193200  | -2.89421100 | 0.96374000  |
|       | H | 6.98485800  | -3.80905000 | 1.47251500  |
|       | H | 4.07388000  | -6.39183900 | -0.34911100 |
|       | C | 3.46963700  | -4.35351700 | -0.06362600 |
|       | H | 6.32635700  | -6.04926900 | 0.63727800  |
|       | H | 5.39388100  | -1.91219200 | 1.32861700  |
|       | H | 2.48494100  | -4.49718500 | -0.49983800 |
|       | C | -2.50758100 | -0.50658900 | -0.59296700 |
|       | C | -3.53954300 | -1.09002600 | -0.84281900 |
|       | C | -7.05957200 | -1.84541300 | -1.82498800 |
|       | C | -7.07576100 | -3.23407900 | -1.70379800 |
|       | C | -5.92699300 | -3.91225300 | -1.29748200 |
|       | C | -4.74271800 | -1.81172200 | -1.13383000 |
|       | C | -5.90004000 | -1.13294200 | -1.54177000 |
|       | H | -7.95226100 | -1.31550900 | -2.14058600 |
|       | H | -5.93821400 | -4.99312700 | -1.20240300 |
|       | C | -4.76155500 | -3.21038000 | -1.01238300 |
|       | H | -7.98235200 | -3.78722800 | -1.92632600 |
|       | H | -5.87917500 | -0.05219000 | -1.63445400 |
|       | H | -3.86546800 | -3.73591200 | -0.69359800 |
| TS-c' | N | -0.08274700 | -0.88316600 | -0.24953900 |
|       | C | -0.07060400 | -2.86679000 | -0.67306600 |
|       | H | 0.37057100  | -3.02631000 | 0.29829800  |
|       | H | 0.57087700  | -2.64253600 | -1.51048400 |
|       | H | -1.14400900 | -2.85894800 | -0.78329100 |
|       | O | 0.07179900  | -4.67667700 | -1.14194000 |

|   |             |             |             |
|---|-------------|-------------|-------------|
| S | -0.81528500 | -5.66167700 | -0.37912300 |
| O | -1.02761300 | -6.87484400 | -1.17614900 |
| O | -2.03102000 | -4.99217700 | 0.11531700  |
| C | 0.16063900  | -6.11586000 | 1.04753400  |
| H | 0.39647000  | -5.18480400 | 1.57338900  |
| H | 1.09194300  | -6.53620200 | 0.65546800  |
| C | -0.56807800 | -7.10123100 | 1.95209500  |
| H | -1.50942200 | -6.65110500 | 2.28695500  |
| C | 0.28373800  | -7.48884800 | 3.15892900  |
| H | -0.82465900 | -7.99534900 | 1.37276900  |
| H | 1.23017000  | -7.92462500 | 2.81187000  |
| C | -0.41996700 | -8.47881400 | 4.08449100  |
| H | 0.54720200  | -6.58544400 | 3.72492500  |
| H | -1.36430400 | -8.04004000 | 4.42966600  |
| C | 0.44065600  | -8.86358800 | 5.28466700  |
| H | -0.68609400 | -9.37750600 | 3.51456200  |
| H | 1.37642400  | -9.32873000 | 4.95873500  |
| H | -0.07608000 | -9.57004000 | 5.93937100  |
| H | 0.69782400  | -7.98049600 | 5.87802900  |
| C | 1.08925800  | -0.29299200 | 0.06039100  |
| C | 1.22307600  | 1.06761400  | 0.28666400  |
| H | 2.20164900  | 1.45684000  | 0.53088500  |
| C | 0.08554300  | 1.90557300  | 0.19350000  |
| N | 0.16575000  | 3.23768500  | 0.39817900  |
| C | -1.14043300 | 1.27256600  | -0.12118700 |
| H | -2.06459000 | 1.82814900  | -0.19988100 |
| C | -1.17413700 | -0.09931600 | -0.32994400 |
| C | 1.44396900  | 3.84527200  | 0.73660600  |
| C | -1.03068700 | 4.06026300  | 0.29880200  |
| H | 1.30262400  | 4.91669000  | 0.86199200  |
| H | 2.18079900  | 3.68474000  | -0.05735900 |
| H | 1.84127500  | 3.43753800  | 1.67226400  |
| H | -1.47627100 | 3.98866700  | -0.69887500 |
| H | -0.76155000 | 5.09851800  | 0.48100400  |
| H | -1.77970500 | 3.76138000  | 1.04008300  |
| C | 2.21747100  | -1.17617900 | 0.15443100  |
| C | 3.08004200  | -2.02358800 | 0.22064400  |
| C | 6.19969300  | -3.99720100 | 0.78816200  |
| C | 5.77777500  | -5.26174800 | 0.37992100  |
| C | 4.47528200  | -5.45060900 | -0.08225000 |
| C | 4.01564500  | -3.10567900 | 0.27506100  |
| C | 5.32485200  | -2.91798800 | 0.73783600  |
| H | 7.21270400  | -3.85165100 | 1.14795400  |
| H | 4.14757400  | -6.43453700 | -0.40148400 |
| C | 3.59169100  | -4.37980700 | -0.13726200 |
| H | 6.46435200  | -6.10092500 | 0.42132100  |
| H | 5.64398600  | -1.93111800 | 1.05541400  |
| H | 2.57478500  | -4.51482800 | -0.49928800 |
| C | -2.41876000 | -0.74627200 | -0.63650000 |

|     |   |             |             |             |
|-----|---|-------------|-------------|-------------|
|     | C | -3.46674800 | -1.30208600 | -0.88114900 |
|     | C | -7.01722500 | -1.90590000 | -1.83866000 |
|     | C | -7.08742100 | -3.29430200 | -1.73034900 |
|     | C | -5.96421100 | -4.02339000 | -1.34137400 |
|     | C | -4.69682500 | -1.97685900 | -1.16937700 |
|     | C | -5.82762200 | -1.24432600 | -1.55961700 |
|     | H | -7.89088000 | -1.33778200 | -2.14014100 |
|     | H | -6.02104000 | -5.10364100 | -1.25636400 |
|     | C | -4.76732700 | -3.37437700 | -1.05963800 |
|     | H | -8.01805100 | -3.80798900 | -1.94841500 |
|     | H | -5.76246400 | -0.16444300 | -1.64122200 |
|     | H | -3.88776400 | -3.93364900 | -0.75085900 |
| 4c' | N | -0.02835800 | -0.94577500 | -0.15950100 |
|     | C | -0.05421300 | -2.39413100 | -0.43195600 |
|     | H | 0.47505900  | -2.91365000 | 0.36554800  |
|     | H | 0.44822500  | -2.60309200 | -1.37546700 |
|     | H | -1.07816800 | -2.74897700 | -0.47514900 |
|     | O | 0.67980900  | -5.07409600 | -1.40895600 |
|     | S | -0.38723700 | -5.85928300 | -0.73637500 |
|     | O | -0.61924100 | -7.18106400 | -1.35957300 |
|     | O | -1.63784300 | -5.08096000 | -0.53973800 |
|     | C | 0.24949000  | -6.18581800 | 0.90860300  |
|     | H | 0.43963400  | -5.20859900 | 1.36482700  |
|     | H | 1.21225600  | -6.68818400 | 0.77113900  |
|     | C | -0.70189600 | -7.01914200 | 1.75461700  |
|     | H | -1.66671900 | -6.50258900 | 1.81682200  |
|     | C | -0.15596800 | -7.27011000 | 3.15813000  |
|     | H | -0.88247600 | -7.97386200 | 1.24752400  |
|     | H | 0.81991800  | -7.76894300 | 3.08629000  |
|     | C | -1.09351000 | -8.11632400 | 4.01654900  |
|     | H | 0.02504100  | -6.30834300 | 3.65709000  |
|     | H | -2.06816300 | -7.61690700 | 4.08498000  |
|     | C | -0.53903100 | -8.36157600 | 5.41731500  |
|     | H | -1.27235200 | -9.07551700 | 3.51467700  |
|     | H | 0.42389800  | -8.88045000 | 5.36817800  |
|     | H | -1.21837100 | -8.97051800 | 6.01937100  |
|     | H | -0.37920600 | -7.41480100 | 5.94346000  |
|     | C | 1.17452100  | -0.34007700 | 0.09010900  |
|     | C | 1.27032500  | 1.01249700  | 0.32405100  |
|     | H | 2.25285000  | 1.41915900  | 0.51427200  |
|     | C | 0.10926300  | 1.82968100  | 0.30759400  |
|     | N | 0.17345000  | 3.14919100  | 0.52530200  |
|     | C | -1.12219900 | 1.17394300  | 0.04734600  |
|     | H | -2.05789900 | 1.71314300  | 0.01851900  |
|     | C | -1.16468100 | -0.18499500 | -0.17958100 |
|     | C | 1.45995100  | 3.78563600  | 0.78895500  |
|     | C | -1.04288500 | 3.95494000  | 0.49454400  |
|     | H | 1.30125500  | 4.85223900  | 0.92823400  |
|     | H | 2.14562400  | 3.64286200  | -0.05156300 |



|     |   |             |             |             |
|-----|---|-------------|-------------|-------------|
|     | H | 1.91643200  | 3.38000700  | 1.69690500  |
|     | H | -1.52110900 | 3.90064800  | -0.48810800 |
|     | H | -0.78290300 | 4.99105000  | 0.69704300  |
|     | H | -1.75207800 | 3.61917100  | 1.25708400  |
|     | C | 2.31771800  | -1.18816400 | 0.09801900  |
|     | C | 3.21173100  | -2.00530500 | 0.09318300  |
|     | C | 6.45994900  | -3.80835100 | 0.40252400  |
|     | C | 6.06684800  | -5.09751400 | 0.04437500  |
|     | C | 4.74071600  | -5.35838700 | -0.30048700 |
|     | C | 4.19764000  | -3.03959300 | 0.07397400  |
|     | C | 5.53037100  | -2.77599700 | 0.41937900  |
|     | H | 7.49218800  | -3.60775700 | 0.66868600  |
|     | H | 4.43896800  | -6.36231800 | -0.58041100 |
|     | C | 3.79884200  | -4.33677700 | -0.28946300 |
|     | H | 6.79650800  | -5.90065300 | 0.03267500  |
|     | H | 5.82336700  | -1.76938400 | 0.69762200  |
|     | H | 2.76247900  | -4.52853800 | -0.56343500 |
|     | C | -2.40245500 | -0.83871700 | -0.44384300 |
|     | C | -3.44230200 | -1.41631600 | -0.67207600 |
|     | C | -7.01270700 | -2.24493200 | -1.34284400 |
|     | C | -6.92641100 | -3.62644400 | -1.51469200 |
|     | C | -5.69612400 | -4.27362700 | -1.40144000 |
|     | C | -4.63286900 | -2.15704300 | -0.95160400 |
|     | C | -5.87033000 | -1.50570900 | -1.06190300 |
|     | H | -7.97117000 | -1.74376800 | -1.43004900 |
|     | H | -5.63363100 | -5.34866700 | -1.53333600 |
|     | C | -4.54431400 | -3.54857300 | -1.11945400 |
|     | H | -7.82072400 | -4.19935600 | -1.73717000 |
|     | H | -5.92447700 | -0.43037500 | -0.92795300 |
|     | H | -3.58080900 | -4.04391500 | -1.02288500 |
| 3d' | N | -0.26496100 | -0.87536200 | -0.08380300 |
|     | C | -0.27895200 | -3.59687000 | -1.04777400 |
|     | H | -0.01276600 | -3.51929300 | 0.00771800  |
|     | H | 0.44711500  | -3.04408500 | -1.63964800 |
|     | H | -1.28455300 | -3.21064000 | -1.21058100 |
|     | O | -0.18099700 | -4.96947200 | -1.50940000 |
|     | S | -1.08009700 | -6.05465700 | -0.74351400 |
|     | O | -1.16950600 | -7.18872100 | -1.64613400 |
|     | O | -2.30268800 | -5.41373600 | -0.27673700 |
|     | C | -0.05884100 | -6.48417500 | 0.65233300  |
|     | H | 0.15168600  | -5.55410500 | 1.18924700  |
|     | H | 0.87231300  | -6.87030700 | 0.22780000  |
|     | C | -0.74885200 | -7.50926200 | 1.54783700  |
|     | H | -1.69020600 | -7.09005500 | 1.91888400  |
|     | C | 0.15338000  | -7.89456000 | 2.71910200  |
|     | H | -0.99451700 | -8.39821700 | 0.95644600  |
|     | H | 1.09917600  | -8.29487400 | 2.33154800  |
|     | C | -0.49232100 | -8.92329400 | 3.64423200  |
|     | H | 0.40682400  | -6.99435900 | 3.29374800  |

|   |             |              |             |
|---|-------------|--------------|-------------|
| H | -1.43726500 | -8.52087600  | 4.03286100  |
| C | 0.41181900  | -9.31355000  | 4.81060600  |
| H | -0.75099000 | -9.82071600  | 3.06653500  |
| H | 1.35705600  | -9.71391700  | 4.41911500  |
| C | -0.22163400 | -10.34179800 | 5.74486200  |
| H | 0.67295400  | -8.41421200  | 5.38502900  |
| H | -0.48492300 | -11.23749300 | 5.16867000  |
| H | -1.16386900 | -9.93917400  | 6.13716800  |
| C | 0.69686300  | -10.72474200 | 6.90156000  |
| H | 1.63255000  | -11.15411000 | 6.52942200  |
| H | 0.22902700  | -11.45953500 | 7.56148400  |
| H | 0.95125800  | -9.84632600  | 7.50291200  |
| C | 0.92240800  | -0.38814500  | 0.30936300  |
| C | 1.16927300  | 0.95004100   | 0.59846800  |
| H | 2.16172700  | 1.24631200   | 0.91023600  |
| C | 0.11624500  | 1.88577400   | 0.47643000  |
| N | 0.29708200  | 3.20395000   | 0.74451000  |
| C | -1.13581200 | 1.37651300   | 0.06223200  |
| H | -2.00045000 | 2.01586200   | -0.05475700 |
| C | -1.26242400 | 0.01513200   | -0.19628600 |
| C | 1.59647400  | 3.68095600   | 1.18703200  |
| C | -0.81947100 | 4.12661300   | 0.62546600  |
| H | 1.54111100  | 4.75531500   | 1.35268100  |
| H | 2.36879300  | 3.48947100   | 0.43363600  |
| H | 1.89990400  | 3.20228500   | 2.12528400  |
| H | -1.20998700 | 4.14950400   | -0.39813600 |
| H | -0.47984100 | 5.12804800   | 0.88307100  |
| H | -1.63714900 | 3.85464400   | 1.30317900  |
| C | 1.96757600  | -1.37417500  | 0.41977200  |
| C | 2.77370300  | -2.27610800  | 0.48347200  |
| C | 5.76933800  | -4.38411900  | 1.21404200  |
| C | 5.39485100  | -5.58721800  | 0.61781100  |
| C | 4.16222400  | -5.69286100  | -0.02486500 |
| C | 3.67548700  | -3.38854700  | 0.53061900  |
| C | 4.91672300  | -3.28676400  | 1.17371600  |
| H | 6.72930100  | -4.29933600  | 1.71186900  |
| H | 3.87000400  | -6.62738400  | -0.49307100 |
| C | 3.30402500  | -4.60121500  | -0.07153500 |
| H | 6.06276500  | -6.44141700  | 0.65171900  |
| H | 5.20144500  | -2.34818500  | 1.63745300  |
| H | 2.34609000  | -4.67570700  | -0.57854100 |
| C | -2.52746700 | -0.53822100  | -0.60718400 |
| C | -3.56157800 | -1.07150000  | -0.94430100 |
| C | -7.06182300 | -1.64564800  | -2.10287700 |
| C | -7.11835000 | -3.03862700  | -2.09408800 |
| C | -6.00268300 | -3.77971300  | -1.70606600 |
| C | -4.77051600 | -1.73386700  | -1.33542300 |
| C | -5.89481300 | -0.99167500  | -1.72579000 |
| H | -7.92920300 | -1.06729100  | -2.40324600 |

|       |   |             |              |             |
|-------|---|-------------|--------------|-------------|
|       | H | -6.04589000 | -4.86389700  | -1.69813200 |
|       | C | -4.83002400 | -3.13640500  | -1.32718400 |
|       | H | -8.03104900 | -3.54651300  | -2.38833700 |
|       | H | -5.84248500 | 0.09195500   | -1.72986700 |
|       | H | -3.96021500 | -3.71074300  | -1.02010200 |
| TS-d' | N | -0.06402300 | -0.98492500  | -0.16198000 |
|       | C | -0.03619400 | -2.94386300  | -0.69324100 |
|       | H | 0.40751400  | -3.15311500  | 0.26760600  |
|       | H | 0.60255800  | -2.66732500  | -1.51683400 |
|       | H | -1.11000500 | -2.93919400  | -0.80272900 |
|       | O | 0.12788100  | -4.72296200  | -1.25952900 |
|       | S | -0.80638000 | -5.74762100  | -0.61457700 |
|       | O | -0.98643800 | -6.90136200  | -1.50246500 |
|       | O | -2.04151200 | -5.09935700  | -0.14045000 |
|       | C | 0.08507500  | -6.31156400  | 0.82894500  |
|       | H | 0.30910100  | -5.42116900  | 1.42523900  |
|       | H | 1.02745600  | -6.72805700  | 0.46016900  |
|       | C | -0.71910900 | -7.33502400  | 1.62041900  |
|       | H | -1.66312700 | -6.87758700  | 1.93735900  |
|       | C | 0.04508400  | -7.84810500  | 2.83915400  |
|       | H | -0.97234000 | -8.17386800  | 0.96190600  |
|       | H | 0.99089300  | -8.30061200  | 2.51305100  |
|       | C | -0.75948100 | -8.86981500  | 3.63844400  |
|       | H | 0.31116400  | -7.00270200  | 3.48735400  |
|       | H | -1.70290100 | -8.41196900  | 3.96555400  |
|       | C | -0.01012000 | -9.40740700  | 4.85488000  |
|       | H | -1.03437700 | -9.70696100  | 2.98242700  |
|       | H | 0.93227000  | -9.86811600  | 4.52778300  |
|       | C | -0.81974100 | -10.42675800 | 5.65281000  |
|       | H | 0.26794500  | -8.57099500  | 5.51098700  |
|       | H | -1.09936400 | -11.25874300 | 4.99421900  |
|       | H | -1.75943200 | -9.96345900  | 5.97904300  |
|       | C | -0.06115400 | -10.96190600 | 6.86419000  |
|       | H | 0.86752900  | -11.45260800 | 6.55560900  |
|       | H | -0.65576300 | -11.68915800 | 7.42333700  |
|       | H | 0.20484900  | -10.14869800 | 7.54713700  |
|       | C | 1.10501700  | -0.40444700  | 0.17602100  |
|       | C | 1.23237900  | 0.94416500   | 0.46832900  |
|       | H | 2.20885500  | 1.32506200   | 0.73303200  |
|       | C | 0.09116200  | 1.78052500   | 0.41392800  |
|       | N | 0.16537000  | 3.10237500   | 0.67904800  |
|       | C | -1.13173000 | 1.15724600   | 0.06954300  |
|       | H | -2.05827500 | 1.71186000   | 0.01651100  |
|       | C | -1.15912500 | -0.20333800  | -0.20480600 |
|       | C | 1.44045700  | 3.69983500   | 1.04608800  |
|       | C | -1.03599300 | 3.92182700   | 0.62292700  |
|       | H | 1.29653800  | 4.76615300   | 1.20695400  |
|       | H | 2.18162300  | 3.56799200   | 0.25101000  |
|       | H | 1.83390200  | 3.26097300   | 1.96934000  |

|     |   |             |             |             |
|-----|---|-------------|-------------|-------------|
|     | H | -1.48691500 | 3.89138100  | -0.37450000 |
|     | H | -0.77125200 | 4.95273600  | 0.84808500  |
|     | H | -1.77911900 | 3.58694900  | 1.35465600  |
|     | C | 2.23915000  | -1.28381600 | 0.22307800  |
|     | C | 3.11031100  | -2.12475200 | 0.23890700  |
|     | C | 6.26690500  | -4.07722800 | 0.65151600  |
|     | C | 5.84973700  | -5.33158400 | 0.20835000  |
|     | C | 4.53765700  | -5.52068500 | -0.22553500 |
|     | C | 4.05879600  | -3.19691800 | 0.22996000  |
|     | C | 5.37765000  | -3.00888600 | 0.66434100  |
|     | H | 7.28755300  | -3.93111000 | 0.98883300  |
|     | H | 4.21348700  | -6.49661700 | -0.57166600 |
|     | C | 3.63953900  | -4.46070200 | -0.21760800 |
|     | H | 6.54741100  | -6.16252900 | 0.20021100  |
|     | H | 5.69335100  | -2.02998500 | 1.00891000  |
|     | H | 2.61512000  | -4.59638900 | -0.55756700 |
|     | C | -2.40199200 | -0.83681800 | -0.54503400 |
|     | C | -3.45397500 | -1.37044100 | -0.82018900 |
|     | C | -7.01632500 | -1.86578200 | -1.79355400 |
|     | C | -7.10318000 | -3.25738700 | -1.78129500 |
|     | C | -5.98677100 | -4.02505400 | -1.45151200 |
|     | C | -4.69300400 | -2.01095900 | -1.14615200 |
|     | C | -5.81705200 | -1.23955500 | -1.47708900 |
|     | H | -7.88443400 | -1.26809700 | -2.05048500 |
|     | H | -6.05645500 | -5.10779900 | -1.44156300 |
|     | C | -4.78025700 | -3.41154100 | -1.13371700 |
|     | H | -8.04136900 | -3.74368900 | -2.02805700 |
|     | H | -5.73888700 | -0.15752500 | -1.48383500 |
|     | H | -3.90552300 | -4.00054600 | -0.87132500 |
| 4d' | N | -0.10566900 | -1.03391400 | 0.04841300  |
|     | C | -0.17909400 | -2.49365100 | -0.14311000 |
|     | H | 0.16851700  | -2.98772700 | 0.76544800  |
|     | H | 0.45299800  | -2.79489900 | -0.97749300 |
|     | H | -1.20151200 | -2.78845100 | -0.34701100 |
|     | O | 0.73047800  | -5.02162400 | -1.75914900 |
|     | S | -0.31653000 | -5.87141700 | -1.13419000 |
|     | O | -0.59124700 | -7.10867300 | -1.89817400 |
|     | O | -1.54643300 | -5.11269000 | -0.78828200 |
|     | C | 0.38785800  | -6.39810900 | 0.42974100  |
|     | H | 0.66074900  | -5.48742200 | 0.97330200  |
|     | H | 1.31114200  | -6.93264500 | 0.18299100  |
|     | C | -0.56246900 | -7.26812600 | 1.23922800  |
|     | H | -1.47729600 | -6.69955500 | 1.44243000  |
|     | C | 0.06092300  | -7.73998500 | 2.55090600  |
|     | H | -0.85138100 | -8.13468900 | 0.63314900  |
|     | H | 0.98341000  | -8.29594400 | 2.33585900  |
|     | C | -0.88052700 | -8.62101600 | 3.36867200  |
|     | H | 0.35731200  | -6.86866900 | 3.15026700  |
|     | H | -1.79967800 | -8.06204800 | 3.59141700  |

|   |             |              |             |
|---|-------------|--------------|-------------|
| C | -0.25767400 | -9.11315500  | 4.67273400  |
| H | -1.18455400 | -9.48517200  | 2.76241900  |
| H | 0.66327200  | -9.66908900  | 4.44810700  |
| C | -1.19378800 | -10.00047000 | 5.49058000  |
| H | 0.04543000  | -8.24952700  | 5.28068800  |
| H | -1.49836200 | -10.85978600 | 4.87998000  |
| H | -2.11145700 | -9.44289100  | 5.71738000  |
| C | -0.55407000 | -10.49077700 | 6.78708100  |
| H | 0.35017900  | -11.07190700 | 6.57866600  |
| H | -1.23626800 | -11.12473400 | 7.35982000  |
| H | -0.26655000 | -9.64670300  | 7.42225200  |
| C | 1.11301700  | -0.45443000  | 0.28282200  |
| C | 1.24475400  | 0.90060100   | 0.48365200  |
| H | 2.23807300  | 1.28675900   | 0.66083400  |
| C | 0.10545100  | 1.74736300   | 0.45019700  |
| N | 0.20448900  | 3.06898900   | 0.64112100  |
| C | -1.14259900 | 1.11923000   | 0.20064700  |
| H | -2.06304100 | 1.68276900   | 0.15416200  |
| C | -1.22129000 | -0.24290600  | 0.00587000  |
| C | 1.50748800  | 3.67628700   | 0.89289700  |
| C | -0.99022500 | 3.90589400   | 0.59593900  |
| H | 1.37696200  | 4.74904300   | 1.01300500  |
| H | 2.18833300  | 3.50046200   | 0.05475400  |
| H | 1.95368600  | 3.27515100   | 1.80787900  |
| H | -1.47129300 | 3.84539100   | -0.38491900 |
| H | -0.70242600 | 4.93848700   | 0.77793300  |
| H | -1.70677800 | 3.60392900   | 1.36573000  |
| C | 2.23303400  | -1.33264400  | 0.30424900  |
| C | 3.10673000  | -2.17161300  | 0.30077600  |
| C | 6.26047700  | -4.10858700  | 0.75703200  |
| C | 5.88098900  | -5.33676800  | 0.21575300  |
| C | 4.59687000  | -5.51124500  | -0.30081900 |
| C | 4.06784900  | -3.22921500  | 0.27047100  |
| C | 5.35918200  | -3.05153300  | 0.78675400  |
| H | 7.25978800  | -3.97500100  | 1.15764200  |
| H | 4.30495700  | -6.46688200  | -0.72482600 |
| C | 3.68349200  | -4.46409800  | -0.27857700 |
| H | 6.58864700  | -6.15919800  | 0.19492200  |
| H | 5.64272100  | -2.09239400  | 1.20723800  |
| H | 2.68175300  | -4.58785000  | -0.68806000 |
| C | -2.47317800 | -0.87127500  | -0.25333200 |
| C | -3.51302100 | -1.44661900  | -0.48766100 |
| C | -7.07894000 | -2.33350900  | -1.11445500 |
| C | -6.96290000 | -3.70406800  | -1.34438900 |
| C | -5.71440300 | -4.32361000  | -1.28932800 |
| C | -4.69337300 | -2.20074000  | -0.77508700 |
| C | -5.94835300 | -1.57753700  | -0.82980500 |
| H | -8.05123200 | -1.85345100  | -1.15921000 |
| H | -5.62774100 | -5.39034400  | -1.46870800 |

|     |   |             |             |             |
|-----|---|-------------|-------------|-------------|
|     | C | -4.57404500 | -3.58131400 | -1.00579000 |
|     | H | -7.84828600 | -4.29006200 | -1.56871600 |
|     | H | -6.02608700 | -0.51037500 | -0.65013000 |
|     | H | -3.59544300 | -4.05592300 | -0.96078900 |
| 3e' | N | -0.11628600 | -0.70669500 | -0.06331900 |
|     | C | -0.22331800 | -3.55188400 | -0.72819900 |
|     | H | 0.21690900  | -3.47656500 | 0.26962400  |
|     | H | 0.43098300  | -3.07010000 | -1.45006400 |
|     | H | -1.21118400 | -3.09107200 | -0.73601800 |
|     | O | -0.30938600 | -4.93495500 | -1.16045700 |
|     | S | -1.15690600 | -5.94079200 | -0.24170100 |
|     | O | -1.60640000 | -6.99786100 | -1.13353400 |
|     | O | -2.14299900 | -5.17477400 | 0.51123900  |
|     | C | 0.08296800  | -6.58632700 | 0.88962700  |
|     | H | 0.47424400  | -5.69126000 | 1.39136000  |
|     | C | -0.62335000 | -7.49170100 | 1.89524300  |
|     | H | 0.11303700  | -7.86397900 | 2.60905400  |
|     | H | -1.07314900 | -8.34613100 | 1.38582000  |
|     | H | -1.39906600 | -6.95375000 | 2.44202200  |
|     | C | 1.17980400  | -7.29849000 | 0.10653800  |
|     | H | 1.64631900  | -6.63893900 | -0.62780000 |
|     | H | 0.76968700  | -8.16832400 | -0.41081600 |
|     | H | 1.94549100  | -7.63899200 | 0.80643600  |
|     | C | 1.07417300  | -0.10217300 | 0.08192400  |
|     | C | 1.27129800  | 1.27510300  | 0.04976500  |
|     | H | 2.27196800  | 1.66564400  | 0.17664900  |
|     | C | 0.16193400  | 2.12607600  | -0.15361500 |
|     | N | 0.29339100  | 3.47605400  | -0.19693900 |
|     | C | -1.09190300 | 1.49524400  | -0.31335500 |
|     | H | -1.99828200 | 2.06166100  | -0.47957300 |
|     | C | -1.16621100 | 0.10615600  | -0.25965000 |
|     | C | 1.60634900  | 4.08060800  | -0.04855100 |
|     | C | -0.87392800 | 4.30908900  | -0.43052600 |
|     | H | 1.50699000  | 5.16258300  | -0.11285900 |
|     | H | 2.29040600  | 3.74967100  | -0.83830400 |
|     | H | 2.05080800  | 3.83324200  | 0.92209800  |
|     | H | -1.33819100 | 4.08540700  | -1.39797400 |
|     | H | -0.56914200 | 5.35397200  | -0.43082000 |
|     | H | -1.62523500 | 4.17094100  | 0.35477900  |
|     | C | 2.19522400  | -0.98616800 | 0.27296000  |
|     | C | 3.11296400  | -1.76292000 | 0.42185500  |
|     | C | 6.47551900  | -3.25070300 | 1.06996900  |
|     | C | 6.19981100  | -4.60759400 | 0.90429100  |
|     | C | 4.90844100  | -5.02282500 | 0.57941000  |
|     | C | 4.16671300  | -2.71935000 | 0.58723000  |
|     | C | 5.46693200  | -2.30678200 | 0.91302000  |
|     | H | 7.48003500  | -2.92683200 | 1.32227700  |
|     | H | 4.69154700  | -6.07846700 | 0.44842900  |
|     | C | 3.89457400  | -4.08619200 | 0.42101100  |

|       |   |             |             |             |
|-------|---|-------------|-------------|-------------|
|       | H | 6.98994800  | -5.34103300 | 1.02799400  |
|       | H | 5.67401300  | -1.24920600 | 1.04065900  |
|       | H | 2.88648300  | -4.39757400 | 0.16484500  |
|       | C | -2.43972500 | -0.54549200 | -0.42650600 |
|       | C | -3.50079200 | -1.11364300 | -0.56538600 |
|       | C | -7.10483400 | -1.75720500 | -1.27332200 |
|       | C | -7.17558100 | -3.13411300 | -1.06558100 |
|       | C | -6.03408000 | -3.84288000 | -0.69195800 |
|       | C | -4.74822600 | -1.79804800 | -0.73336600 |
|       | C | -5.89844300 | -1.08779700 | -1.10868300 |
|       | H | -7.99160400 | -1.20342000 | -1.56358500 |
|       | H | -6.08833100 | -4.91444400 | -0.52994700 |
|       | C | -4.82154800 | -3.18390000 | -0.52451800 |
|       | H | -8.11942000 | -3.65330900 | -1.19514900 |
|       | H | -5.83452900 | -0.01663300 | -1.26860800 |
|       | H | -3.93011500 | -3.73156200 | -0.23044400 |
| TS-e' | N | -0.05234400 | -0.59145300 | -0.27475100 |
|       | C | -0.08313500 | -2.61511400 | -0.47026100 |
|       | H | 0.16288000  | -2.68834800 | 0.57677500  |
|       | H | 0.69997100  | -2.51621400 | -1.20476100 |
|       | H | -1.11703600 | -2.56030200 | -0.77140200 |
|       | O | 0.01817600  | -4.47152500 | -0.71417200 |
|       | S | -0.91289900 | -5.32833300 | 0.14978800  |
|       | O | -1.81832300 | -6.13298800 | -0.68383000 |
|       | O | -1.57025100 | -4.50183700 | 1.17822700  |
|       | C | 0.21112900  | -6.45250500 | 0.99728900  |
|       | H | 0.86229400  | -5.78413000 | 1.57282800  |
|       | C | -0.59491000 | -7.34746400 | 1.93214200  |
|       | H | 0.08492800  | -7.98879200 | 2.49795800  |
|       | H | -1.27019800 | -7.98304500 | 1.35267900  |
|       | H | -1.18424500 | -6.75515500 | 2.63471700  |
|       | C | 1.02357400  | -7.24390300 | -0.02050100 |
|       | H | 1.59396000  | -6.58243100 | -0.67731800 |
|       | H | 0.36124100  | -7.85958000 | -0.63567600 |
|       | H | 1.71777400  | -7.90451700 | 0.50620200  |
|       | C | 1.13531500  | 0.01363100  | -0.07340400 |
|       | C | 1.29127500  | 1.38985700  | -0.02779700 |
|       | H | 2.28042300  | 1.79369100  | 0.13727300  |
|       | C | 0.16049400  | 2.22577600  | -0.19484500 |
|       | N | 0.26305900  | 3.57194400  | -0.16813000 |
|       | C | -1.08410200 | 1.57781500  | -0.38288200 |
|       | H | -2.00446800 | 2.13304200  | -0.49900500 |
|       | C | -1.13885700 | 0.19192000  | -0.41256700 |
|       | C | 1.56127100  | 4.19774100  | 0.03398200  |
|       | C | -0.92416400 | 4.39447300  | -0.34548400 |
|       | H | 1.43616700  | 5.27832100  | 0.02868500  |
|       | H | 2.25989200  | 3.92636000  | -0.76463500 |
|       | H | 1.99588500  | 3.90509500  | 0.99559600  |
|       | H | -1.39546300 | 4.20410200  | -1.31559200 |

|     |   |             |             |             |
|-----|---|-------------|-------------|-------------|
|     | H | -0.63612000 | 5.44279800  | -0.30426000 |
|     | H | -1.65877000 | 4.20636200  | 0.44462900  |
|     | C | 2.24835600  | -0.87510900 | 0.11032200  |
|     | C | 3.08191400  | -1.73944700 | 0.26819400  |
|     | C | 6.14910200  | -3.76536000 | 0.93931700  |
|     | C | 5.63500600  | -5.05434700 | 0.80823900  |
|     | C | 4.28907700  | -5.24229600 | 0.49375700  |
|     | C | 3.97121200  | -2.84713500 | 0.44695200  |
|     | C | 5.32371200  | -2.66089600 | 0.76091900  |
|     | H | 7.19622600  | -3.61946100 | 1.18230200  |
|     | H | 3.88944000  | -6.24599000 | 0.38968200  |
|     | C | 3.45462300  | -4.14687400 | 0.31087300  |
|     | H | 6.28329400  | -5.91268700 | 0.95048000  |
|     | H | 5.71595000  | -1.65496600 | 0.86427600  |
|     | H | 2.40425100  | -4.28222600 | 0.05927500  |
|     | C | -2.39193200 | -0.49024400 | -0.57663800 |
|     | C | -3.40876200 | -1.13830700 | -0.69103500 |
|     | C | -6.87280300 | -2.32319900 | -1.42091400 |
|     | C | -6.75756900 | -3.67269000 | -1.08905100 |
|     | C | -5.54548000 | -4.17687800 | -0.61810200 |
|     | C | -4.55975800 | -1.98140400 | -0.81813900 |
|     | C | -5.77941500 | -1.47515300 | -1.28884500 |
|     | H | -7.81623800 | -1.93120600 | -1.78602900 |
|     | H | -5.45410000 | -5.22684300 | -0.35922900 |
|     | C | -4.44584000 | -3.33897200 | -0.47816200 |
|     | H | -7.61315300 | -4.33154600 | -1.19602000 |
|     | H | -5.85812400 | -0.42495300 | -1.54950100 |
|     | H | -3.50191200 | -3.72170300 | -0.09832400 |
| 4e' | N | -0.08959500 | -0.51368600 | -0.55721300 |
|     | C | -0.21040600 | -1.96224900 | -0.81690500 |
|     | H | -0.41281800 | -2.50574400 | 0.10823700  |
|     | H | 0.71485500  | -2.31919800 | -1.25666300 |
|     | H | -1.02768600 | -2.12505800 | -1.51553600 |
|     | O | 0.10807900  | -4.84125100 | -0.91894500 |
|     | S | -0.78882600 | -5.37466100 | 0.14111100  |
|     | O | -1.84443200 | -6.27087600 | -0.38807100 |
|     | O | -1.32826800 | -4.31065600 | 1.02912000  |
|     | C | 0.27284500  | -6.39007600 | 1.19290400  |
|     | H | 1.03838800  | -5.68963600 | 1.54931800  |
|     | C | -0.52702600 | -6.93833100 | 2.36717900  |
|     | H | 0.12494400  | -7.52016800 | 3.02428700  |
|     | H | -1.32367900 | -7.59285600 | 2.00080200  |
|     | H | -0.97767300 | -6.12950600 | 2.94461700  |
|     | C | 0.91904700  | -7.49036400 | 0.36140400  |
|     | H | 1.46319300  | -7.07021400 | -0.48805600 |
|     | H | 0.15156600  | -8.16889900 | -0.02276200 |
|     | H | 1.61428000  | -8.06680900 | 0.97847100  |
|     | C | 1.12520600  | 0.03111900  | -0.23926500 |
|     | C | 1.27488700  | 1.38363500  | -0.02920100 |



|     |   |             |             |             |
|-----|---|-------------|-------------|-------------|
|     | H | 2.26271400  | 1.74494100  | 0.21717100  |
|     | C | 0.15785400  | 2.25569400  | -0.11570200 |
|     | N | 0.28092600  | 3.57731800  | 0.06262600  |
|     | C | -1.10153400 | 1.64955100  | -0.36705700 |
|     | H | -2.01686000 | 2.22299600  | -0.38233600 |
|     | C | -1.19709400 | 0.29070500  | -0.56713700 |
|     | C | 1.58271000  | 4.15471000  | 0.38068400  |
|     | C | -0.89325400 | 4.43986600  | -0.02050900 |
|     | H | 1.47123800  | 5.23078600  | 0.48925500  |
|     | H | 2.30199000  | 3.95825000  | -0.41959500 |
|     | H | 1.97172900  | 3.74929200  | 1.31975400  |
|     | H | -1.38652400 | 4.32717200  | -0.99008600 |
|     | H | -0.57569300 | 5.47446100  | 0.08575300  |
|     | H | -1.60879800 | 4.20951300  | 0.77504500  |
|     | C | 2.20922400  | -0.88067600 | -0.09058800 |
|     | C | 3.02288600  | -1.76628700 | 0.05470000  |
|     | C | 6.04490100  | -3.84930700 | 0.72363200  |
|     | C | 5.50189700  | -5.12716100 | 0.59552500  |
|     | C | 4.15247900  | -5.28915100 | 0.28084600  |
|     | C | 3.88686300  | -2.89186200 | 0.22955700  |
|     | C | 5.24278900  | -2.72892600 | 0.54340100  |
|     | H | 7.09489000  | -3.72561900 | 0.96604800  |
|     | H | 3.73367400  | -6.28538700 | 0.17963400  |
|     | C | 3.33793800  | -4.17914000 | 0.09308700  |
|     | H | 6.13197400  | -5.99868000 | 0.74032500  |
|     | H | 5.65407500  | -1.73043100 | 0.64512700  |
|     | H | 2.28474600  | -4.29693200 | -0.16129100 |
|     | C | -2.45018200 | -0.36281400 | -0.74558200 |
|     | C | -3.43720900 | -1.05630600 | -0.85587000 |
|     | C | -6.79335800 | -2.53729800 | -1.54757900 |
|     | C | -6.54333700 | -3.87412400 | -1.23737300 |
|     | C | -5.28162600 | -4.26803800 | -0.79172700 |
|     | C | -4.51591300 | -1.98723400 | -0.97602900 |
|     | C | -5.78440200 | -1.58979600 | -1.41986000 |
|     | H | -7.77583000 | -2.23294100 | -1.89232300 |
|     | H | -5.08443000 | -5.30731300 | -0.54993300 |
|     | C | -4.26356600 | -3.33228200 | -0.65663900 |
|     | H | -7.33393700 | -4.60992600 | -1.34330500 |
|     | H | -5.96703400 | -0.54865200 | -1.66363800 |
|     | H | -3.28099800 | -3.62889000 | -0.29504600 |
| 3f' | N | -0.10655400 | -0.81862300 | -0.38941500 |
|     | C | -0.14426000 | -3.71364000 | -0.68311800 |
|     | H | 0.52486800  | -3.34476300 | 0.09921700  |
|     | H | 0.23259400  | -3.39720100 | -1.65497500 |
|     | H | -1.15792600 | -3.33808300 | -0.53075800 |
|     | O | -0.13598800 | -5.16270600 | -0.71500000 |
|     | S | -0.89145200 | -5.91170500 | 0.48790000  |
|     | O | -0.77323900 | -7.32587300 | 0.16848700  |
|     | O | -2.21892500 | -5.32448400 | 0.63632800  |

|   |             |             |             |
|---|-------------|-------------|-------------|
| C | 0.11029100  | -5.53127100 | 1.93740700  |
| H | -0.02794300 | -4.45243500 | 2.08755000  |
| C | -0.45078000 | -6.30678900 | 3.14067000  |
| H | 0.34240900  | -6.31656100 | 3.89581100  |
| H | -0.60083800 | -7.35166800 | 2.84194500  |
| C | -1.72446500 | -5.72278800 | 3.74912100  |
| H | -1.55644500 | -4.68830000 | 4.06628500  |
| H | -2.02025600 | -6.30203600 | 4.62731400  |
| H | -2.55320900 | -5.72905900 | 3.03785500  |
| C | 1.58629700  | -5.84757500 | 1.65748000  |
| H | 1.84083600  | -5.57587400 | 0.62879000  |
| H | 1.73466600  | -6.92978000 | 1.74974900  |
| C | 2.50953700  | -5.08526300 | 2.60677100  |
| H | 2.38486000  | -4.00440900 | 2.47727200  |
| H | 3.55464600  | -5.32561700 | 2.39020600  |
| H | 2.31450000  | -5.32962600 | 3.65474200  |
| C | 1.06849600  | -0.22485200 | -0.12868200 |
| C | 1.24523100  | 1.14685700  | 0.01830000  |
| H | 2.23504800  | 1.53022800  | 0.22595000  |
| C | 0.12710900  | 2.00241900  | -0.10851100 |
| N | 0.23922100  | 3.34851900  | 0.02283100  |
| C | -1.11420100 | 1.38110100  | -0.37318800 |
| H | -2.02724800 | 1.95265600  | -0.47180200 |
| C | -1.16750800 | -0.00398700 | -0.49832200 |
| C | 1.53078300  | 3.94067000  | 0.32615200  |
| C | -0.93610600 | 4.19019300  | -0.12302700 |
| H | 1.41321700  | 5.01889100  | 0.41669900  |
| H | 2.25941100  | 3.73859800  | -0.46710200 |
| H | 1.93172800  | 3.55805800  | 1.27151600  |
| H | -1.39426300 | 4.06347400  | -1.11015100 |
| H | -0.64055900 | 5.23213500  | -0.01541700 |
| H | -1.68883800 | 3.96383800  | 0.64079500  |
| C | 2.18560900  | -1.12533900 | 0.01276600  |
| C | 3.06549800  | -1.94733700 | 0.14582900  |
| C | 6.07388700  | -3.78138100 | 1.37357000  |
| C | 5.96605600  | -4.97646800 | 0.66159000  |
| C | 4.91476400  | -5.16218700 | -0.23686300 |
| C | 4.06991800  | -2.95844600 | 0.30022100  |
| C | 5.13248500  | -2.77396800 | 1.19610600  |
| H | 6.89219700  | -3.63490700 | 2.07108700  |
| H | 4.82868500  | -6.09149300 | -0.79296200 |
| C | 3.96923300  | -4.15904400 | -0.42061000 |
| H | 6.70147900  | -5.76116100 | 0.80535200  |
| H | 5.20657500  | -1.84393100 | 1.75019300  |
| H | 3.14747800  | -4.29551600 | -1.11798200 |
| C | -2.42461200 | -0.66349400 | -0.74478900 |
| C | -3.45528600 | -1.27114700 | -0.93477700 |
| C | -6.96222400 | -2.11598600 | -1.88912600 |
| C | -6.99621800 | -3.47857600 | -1.59688200 |

|       |   |             |             |             |
|-------|---|-------------|-------------|-------------|
|       | C | -5.86436300 | -4.10931700 | -1.08310200 |
|       | C | -4.66023800 | -2.01500200 | -1.15718200 |
|       | C | -5.80148100 | -1.38320900 | -1.67132700 |
|       | H | -7.84210600 | -1.62352500 | -2.28899700 |
|       | H | -5.88948200 | -5.16930100 | -0.85323500 |
|       | C | -4.69746900 | -3.38670700 | -0.86210300 |
|       | H | -7.90417500 | -4.04731900 | -1.76964500 |
|       | H | -5.76703700 | -0.32289000 | -1.89744100 |
|       | H | -3.81561800 | -3.87462000 | -0.45676900 |
| TS-f' | N | -0.02460000 | -0.79888300 | -0.29747800 |
|       | C | 0.04392900  | -2.82437900 | -0.40658100 |
|       | H | 0.49263700  | -2.81451900 | 0.57459100  |
|       | H | 0.67874400  | -2.72344100 | -1.27271000 |
|       | H | -1.02979900 | -2.86347900 | -0.51092800 |
|       | O | 0.23238200  | -4.68756100 | -0.56613700 |
|       | S | -0.69420700 | -5.54228200 | 0.30349500  |
|       | O | -0.82499800 | -6.88941400 | -0.26534100 |
|       | O | -1.95831100 | -4.82621100 | 0.55494600  |
|       | C | 0.18332300  | -5.70104400 | 1.87151700  |
|       | H | 0.41178200  | -4.66624200 | 2.16192300  |
|       | C | -0.71464200 | -6.36315000 | 2.92623800  |
|       | H | -0.05467900 | -6.81231400 | 3.67623000  |
|       | H | -1.24493100 | -7.19864100 | 2.45272700  |
|       | C | -1.69350700 | -5.42100500 | 3.62140700  |
|       | H | -1.15474600 | -4.60700500 | 4.11688000  |
|       | H | -2.26381400 | -5.95752200 | 4.38420300  |
|       | H | -2.39132800 | -4.98398000 | 2.90611500  |
|       | C | 1.48740600  | -6.47482000 | 1.64115400  |
|       | H | 1.91967500  | -6.18527600 | 0.67792300  |
|       | H | 1.24833200  | -7.54177700 | 1.57482200  |
|       | C | 2.50777600  | -6.21457200 | 2.74676900  |
|       | H | 2.79028600  | -5.15727600 | 2.76756500  |
|       | H | 3.41672700  | -6.79767100 | 2.57713900  |
|       | H | 2.11703600  | -6.48222000 | 3.73276100  |
|       | C | 1.12573600  | -0.13449200 | -0.06597600 |
|       | C | 1.21119800  | 1.24694000  | 0.00166000  |
|       | H | 2.17639900  | 1.69551200  | 0.19113200  |
|       | C | 0.04410400  | 2.02791500  | -0.17752000 |
|       | N | 0.07569000  | 3.37652800  | -0.11912800 |
|       | C | -1.15701500 | 1.31942800  | -0.41769400 |
|       | H | -2.09968900 | 1.82812100  | -0.56370500 |
|       | C | -1.14207800 | -0.06817200 | -0.46637000 |
|       | C | 1.33350700  | 4.06358300  | 0.13387400  |
|       | C | -1.15053000 | 4.14001100  | -0.29565600 |
|       | H | 1.15342500  | 5.13645500  | 0.14251500  |
|       | H | 2.06861000  | 3.84339200  | -0.64743400 |
|       | H | 1.75395700  | 3.77555800  | 1.10336100  |
|       | H | -1.58803400 | 3.96403700  | -1.28407700 |
|       | H | -0.92227800 | 5.19995600  | -0.20523800 |

|     |   |             |             |             |
|-----|---|-------------|-------------|-------------|
|     | H | -1.89154100 | 3.87994400  | 0.46782000  |
|     | C | 2.28853200  | -0.95609500 | 0.11727600  |
|     | C | 3.19203300  | -1.74829800 | 0.26570000  |
|     | C | 6.39616000  | -3.51666900 | 1.01373800  |
|     | C | 6.03537800  | -4.83028900 | 0.71586300  |
|     | C | 4.74669200  | -5.11844900 | 0.26725400  |
|     | C | 4.17772600  | -2.77468200 | 0.41966200  |
|     | C | 5.47377100  | -2.48689900 | 0.86738200  |
|     | H | 7.39933000  | -3.29435100 | 1.36171600  |
|     | H | 4.46619600  | -6.14132100 | 0.03482300  |
|     | C | 3.81563100  | -4.09735300 | 0.11783800  |
|     | H | 6.75993100  | -5.62934900 | 0.83297500  |
|     | H | 5.74501900  | -1.46235400 | 1.09854300  |
|     | H | 2.80564400  | -4.30710000 | -0.22818000 |
|     | C | -2.36538800 | -0.78300100 | -0.69931700 |
|     | C | -3.40373300 | -1.37875200 | -0.88386700 |
|     | C | -6.94237000 | -2.10667600 | -1.79476300 |
|     | C | -7.00654800 | -3.47540200 | -1.53588400 |
|     | C | -5.88314500 | -4.15068200 | -1.06060300 |
|     | C | -4.62709900 | -2.09045400 | -1.10464400 |
|     | C | -5.75839300 | -1.41173700 | -1.58109900 |
|     | H | -7.81639700 | -1.58021600 | -2.16366200 |
|     | H | -5.93498800 | -5.21540900 | -0.85810700 |
|     | C | -4.69174400 | -3.46775700 | -0.84288900 |
|     | H | -7.93302400 | -4.01465900 | -1.70441000 |
|     | H | -5.69819500 | -0.34689000 | -1.77977200 |
|     | H | -3.81185100 | -3.98349000 | -0.46696600 |
| 4f' | N | -0.18544000 | -0.80961900 | -0.12439500 |
|     | C | -0.30970300 | -2.27442500 | -0.03277800 |
|     | H | -0.30988900 | -2.57090800 | 1.02082000  |
|     | H | 0.52315100  | -2.75061200 | -0.55068000 |
|     | H | -1.23612700 | -2.59634000 | -0.49454300 |
|     | O | 0.96713900  | -5.07785900 | -1.22043000 |
|     | S | -0.13793600 | -5.72264100 | -0.46070000 |
|     | O | -0.30869500 | -7.15864000 | -0.78454600 |
|     | O | -1.41042600 | -4.95834300 | -0.54613900 |
|     | C | 0.38913900  | -5.66608500 | 1.27082600  |
|     | H | 0.72031500  | -4.62877700 | 1.42477500  |
|     | C | -0.77402100 | -6.00096800 | 2.21254400  |
|     | H | -0.35359400 | -6.41034000 | 3.13807600  |
|     | H | -1.35958700 | -6.81191300 | 1.76182600  |
|     | C | -1.67028900 | -4.81291900 | 2.55474000  |
|     | H | -1.09109000 | -4.03074400 | 3.05858900  |
|     | H | -2.47820900 | -5.11383900 | 3.22776300  |
|     | H | -2.10925700 | -4.38758000 | 1.64900500  |
|     | C | 1.58921100  | -6.60188200 | 1.45420900  |
|     | H | 2.24904800  | -6.51019200 | 0.58452600  |
|     | H | 1.22603800  | -7.63593000 | 1.46592600  |
|     | C | 2.38198400  | -6.29517400 | 2.72311100  |

|     |   |             |             |             |
|-----|---|-------------|-------------|-------------|
|     | H | 2.75486400  | -5.26561300 | 2.70618800  |
|     | H | 3.24614100  | -6.96042300 | 2.80932700  |
|     | H | 1.77452900  | -6.42002100 | 3.62454000  |
|     | C | 1.03271200  | -0.21744200 | 0.07260700  |
|     | C | 1.19076500  | 1.14823400  | 0.01134700  |
|     | H | 2.18255400  | 1.54520800  | 0.17205600  |
|     | C | 0.08063000  | 1.99220700  | -0.25708000 |
|     | N | 0.20977600  | 3.32284000  | -0.33057000 |
|     | C | -1.17284700 | 1.35075600  | -0.43711400 |
|     | H | -2.07604300 | 1.90984700  | -0.63433200 |
|     | C | -1.27888400 | -0.02032400 | -0.36002900 |
|     | C | 1.51687100  | 3.94305900  | -0.13793800 |
|     | C | -0.95536700 | 4.15761300  | -0.60593500 |
|     | H | 1.41170100  | 5.02054600  | -0.23954500 |
|     | H | 2.22983200  | 3.59122400  | -0.88931900 |
|     | H | 1.91031300  | 3.72411800  | 0.85943200  |
|     | H | -1.39099000 | 3.91055100  | -1.57885100 |
|     | H | -0.64504800 | 5.19990000  | -0.62008000 |
|     | H | -1.71650800 | 4.03217000  | 0.16996800  |
|     | C | 2.13082200  | -1.08224900 | 0.34885900  |
|     | C | 3.01906100  | -1.87682700 | 0.56004000  |
|     | C | 6.16908800  | -3.51252000 | 1.69592800  |
|     | C | 5.98496500  | -4.80028600 | 1.18982700  |
|     | C | 4.82887800  | -5.11659900 | 0.47700000  |
|     | C | 4.03594000  | -2.85906200 | 0.77694800  |
|     | C | 5.20052800  | -2.53831100 | 1.49047900  |
|     | H | 7.06884700  | -3.26769700 | 2.25061500  |
|     | H | 4.68979000  | -6.11983400 | 0.08477600  |
|     | C | 3.84700000  | -4.15433000 | 0.26721400  |
|     | H | 6.74485800  | -5.55771500 | 1.35070500  |
|     | H | 5.33253000  | -1.53383500 | 1.87968400  |
|     | H | 2.93513200  | -4.39300600 | -0.27921600 |
|     | C | -2.53744200 | -0.67179400 | -0.50531400 |
|     | C | -3.57233900 | -1.29281900 | -0.59659200 |
|     | C | -7.14225400 | -2.33577900 | -0.84115900 |
|     | C | -7.00328400 | -3.72310800 | -0.83001800 |
|     | C | -5.73713500 | -4.30290300 | -0.74994300 |
|     | C | -4.74565200 | -2.10529900 | -0.68601100 |
|     | C | -6.01776600 | -1.52252100 | -0.76960500 |
|     | H | -8.12799800 | -1.88761500 | -0.90566700 |
|     | H | -5.63324400 | -5.38263000 | -0.74310200 |
|     | C | -4.60278500 | -3.50277900 | -0.67786800 |
|     | H | -7.88465400 | -4.35420400 | -0.88295800 |
|     | H | -6.11277800 | -0.44215000 | -0.77543300 |
|     | H | -3.61037700 | -3.94524800 | -0.61889000 |
| 3g' | N | -0.11972300 | -1.01715500 | -0.08761100 |
|     | C | -0.15178900 | -3.89520700 | -0.57975200 |
|     | H | 0.44905700  | -3.52971200 | 0.25361300  |
|     | H | 0.27565400  | -3.54036100 | -1.51530100 |

|   |             |             |             |
|---|-------------|-------------|-------------|
| H | -1.18389800 | -3.55316600 | -0.48933000 |
| O | -0.09071100 | -5.34232800 | -0.63836700 |
| S | -1.02260100 | -6.13728300 | 0.40158600  |
| O | -0.71085700 | -7.53915200 | 0.17653900  |
| O | -2.39808800 | -5.68185100 | 0.23228000  |
| C | -0.40431600 | -5.62392000 | 2.01217200  |
| H | -0.60168100 | -4.54391400 | 2.05033300  |
| C | -1.21193200 | -6.34272200 | 3.10531000  |
| H | -0.58289200 | -6.34900700 | 4.00439000  |
| H | -1.33861900 | -7.39615300 | 2.82004900  |
| C | -2.56054800 | -5.70987000 | 3.44522100  |
| H | -2.39105900 | -4.67287800 | 3.76014400  |
| C | -3.27360500 | -6.48027600 | 4.55385200  |
| H | -3.18986400 | -5.66987800 | 2.55108200  |
| H | -3.49075800 | -7.50620500 | 4.23807000  |
| H | -4.22044900 | -6.00376000 | 4.81968500  |
| H | -2.65573900 | -6.53287400 | 5.45693000  |
| C | 1.10250000  | -5.89863100 | 2.10888500  |
| H | 1.58962800  | -5.76607300 | 1.13658600  |
| H | 1.24638400  | -6.94755100 | 2.39681700  |
| C | 1.77163600  | -4.96367300 | 3.11907900  |
| H | 1.73994700  | -3.94110500 | 2.72037400  |
| C | 3.21484600  | -5.36825400 | 3.39866900  |
| H | 1.20090400  | -4.95057200 | 4.05573400  |
| H | 3.25755600  | -6.36524700 | 3.85188500  |
| H | 3.69881700  | -4.66538000 | 4.08485400  |
| H | 3.79550400  | -5.39386700 | 2.47178100  |
| C | 1.08116400  | -0.45912400 | 0.13385800  |
| C | 1.31392900  | 0.90956100  | 0.21299800  |
| H | 2.32062800  | 1.26293800  | 0.39070100  |
| C | 0.22951400  | 1.80202400  | 0.05123700  |
| N | 0.39641700  | 3.14718900  | 0.11584000  |
| C | -1.03731200 | 1.21928200  | -0.17914200 |
| H | -1.92621900 | 1.82145700  | -0.31000400 |
| C | -1.14725900 | -0.16693500 | -0.23540200 |
| C | 1.72056800  | 3.70191200  | 0.34038900  |
| C | -0.73981300 | 4.02821400  | -0.09395600 |
| H | 1.64654700  | 4.78680300  | 0.38529200  |
| H | 2.41032700  | 3.43458600  | -0.46860900 |
| H | 2.14217000  | 3.34790500  | 1.28743800  |
| H | -1.18497100 | 3.87752000  | -1.08399400 |
| H | -0.40384300 | 5.06098500  | -0.02305300 |
| H | -1.51470400 | 3.86587600  | 0.66341800  |
| C | 2.16363300  | -1.39955200 | 0.28322200  |
| C | 3.00803100  | -2.26311100 | 0.37726500  |
| C | 6.07863300  | -4.24579000 | 1.15797600  |
| C | 5.79356900  | -5.43899300 | 0.49495000  |
| C | 4.59019900  | -5.58383800 | -0.19516300 |
| C | 3.96019100  | -3.33294500 | 0.43527300  |

|       |   |             |             |             |
|-------|---|-------------|-------------|-------------|
|       | C | 5.16937400  | -3.19398800 | 1.13092800  |
|       | H | 7.01358900  | -4.13370800 | 1.69712500  |
|       | H | 4.36410200  | -6.51189000 | -0.70987800 |
|       | C | 3.67543000  | -4.53779100 | -0.22754600 |
|       | H | 6.50660200  | -6.25645100 | 0.51883900  |
|       | H | 5.38574400  | -2.26300300 | 1.64438000  |
|       | H | 2.73755000  | -4.64249600 | -0.76592000 |
|       | C | -2.43004500 | -0.78464500 | -0.45493100 |
|       | C | -3.48984300 | -1.33713700 | -0.65354100 |
|       | C | -7.07606400 | -1.98030000 | -1.45953100 |
|       | C | -7.14427300 | -3.36171900 | -1.28310400 |
|       | C | -6.00721100 | -4.07273500 | -0.90096100 |
|       | C | -4.73121600 | -2.02011200 | -0.86963000 |
|       | C | -5.87697800 | -1.30800800 | -1.25417400 |
|       | H | -7.95950400 | -1.42493400 | -1.75676600 |
|       | H | -6.05809000 | -5.14799500 | -0.76331700 |
|       | C | -4.80224100 | -3.41100800 | -0.69387900 |
|       | H | -8.08242300 | -3.88286300 | -1.44382600 |
|       | H | -5.81616400 | -0.23311600 | -1.38884100 |
|       | H | -3.91584700 | -3.96344200 | -0.39552100 |
| TS-g' | N | -0.08619200 | -1.14684300 | -0.17710500 |
|       | C | -0.17363700 | -3.15995400 | -0.32938700 |
|       | H | 0.44405600  | -3.19567600 | 0.55347800  |
|       | H | 0.30111600  | -3.09023000 | -1.29573400 |
|       | H | -1.25146700 | -3.12511700 | -0.25272700 |
|       | O | -0.12470100 | -5.03172400 | -0.48843200 |
|       | S | -1.03675600 | -5.79537500 | 0.47515500  |
|       | O | -0.90580800 | -7.23994000 | 0.24916100  |
|       | O | -2.40589400 | -5.25069400 | 0.41537800  |
|       | C | -0.37750200 | -5.43291500 | 2.11598800  |
|       | H | -0.51737300 | -4.34911600 | 2.22828800  |
|       | C | -1.17447000 | -6.16840600 | 3.20016700  |
|       | H | -0.54978900 | -6.17398900 | 4.10283400  |
|       | H | -1.28208600 | -7.21837800 | 2.89787500  |
|       | C | -2.53675000 | -5.57325600 | 3.55224300  |
|       | H | -2.40297300 | -4.51870100 | 3.82513300  |
|       | C | -3.19432800 | -6.32512700 | 4.70647400  |
|       | H | -3.18462400 | -5.58859500 | 2.67208500  |
|       | H | -3.35136200 | -7.37700600 | 4.44710700  |
|       | H | -4.16628400 | -5.89416600 | 4.95999200  |
|       | H | -2.56769600 | -6.29452400 | 5.60367000  |
|       | C | 1.11664200  | -5.77727300 | 2.17134000  |
|       | H | 1.57947900  | -5.63433100 | 1.18924300  |
|       | H | 1.22137600  | -6.84034500 | 2.42221800  |
|       | C | 1.86376100  | -4.91508100 | 3.19023400  |
|       | H | 1.87000900  | -3.87626800 | 2.83300100  |
|       | C | 3.29580500  | -5.39424500 | 3.40852500  |
|       | H | 1.32507500  | -4.91046200 | 4.14620700  |
|       | H | 3.30468500  | -6.40144800 | 3.83719500  |

|     |   |             |             |             |
|-----|---|-------------|-------------|-------------|
|     | H | 3.83797600  | -4.73255400 | 4.08939700  |
|     | H | 3.84415400  | -5.42741000 | 2.46165900  |
|     | C | 1.10601500  | -0.57542500 | 0.08900600  |
|     | C | 1.28217800  | 0.79102700  | 0.23591100  |
|     | H | 2.27485400  | 1.16465300  | 0.44527300  |
|     | C | 0.16959400  | 1.65654500  | 0.10285500  |
|     | N | 0.29058600  | 2.99447600  | 0.23623000  |
|     | C | -1.07538300 | 1.04472500  | -0.17589800 |
|     | H | -1.98208800 | 1.62271500  | -0.28864200 |
|     | C | -1.15278200 | -0.33530300 | -0.30365600 |
|     | C | 1.58770300  | 3.58001000  | 0.54039800  |
|     | C | -0.87676200 | 3.84885700  | 0.07703100  |
|     | H | 1.47436300  | 4.65798800  | 0.63360600  |
|     | H | 2.31213300  | 3.37546000  | -0.25512200 |
|     | H | 1.98375100  | 3.19222800  | 1.48474700  |
|     | H | -1.31922400 | 3.73078500  | -0.91756900 |
|     | H | -0.57263800 | 4.88664200  | 0.19604200  |
|     | H | -1.63948000 | 3.62285200  | 0.82994200  |
|     | C | 2.21480900  | -1.48017000 | 0.21198800  |
|     | C | 3.07111100  | -2.33280500 | 0.29359900  |
|     | C | 6.14594400  | -4.34112300 | 0.97777700  |
|     | C | 5.80000200  | -5.54976300 | 0.37441800  |
|     | C | 4.55845300  | -5.69348700 | -0.24526000 |
|     | C | 4.01183600  | -3.41142900 | 0.33671900  |
|     | C | 5.25864800  | -3.27086900 | 0.96118600  |
|     | H | 7.11088500  | -4.23120200 | 1.46116100  |
|     | H | 4.28669800  | -6.63487600 | -0.71105000 |
|     | C | 3.66299500  | -4.63091700 | -0.26608500 |
|     | H | 6.49699000  | -6.38116600 | 0.38889900  |
|     | H | 5.52062100  | -2.32690600 | 1.42703900  |
|     | H | 2.68867900  | -4.73398500 | -0.73680000 |
|     | C | -2.41887800 | -0.95455100 | -0.57799600 |
|     | C | -3.49141300 | -1.47105100 | -0.80251600 |
|     | C | -7.06938900 | -1.93065600 | -1.73775800 |
|     | C | -7.20201700 | -3.31228400 | -1.60481400 |
|     | C | -6.11219200 | -4.08423900 | -1.20440000 |
|     | C | -4.75261600 | -2.09471600 | -1.07188400 |
|     | C | -5.85028000 | -1.31865600 | -1.47284800 |
|     | H | -7.91743200 | -1.32926300 | -2.04762200 |
|     | H | -6.21773600 | -5.15907600 | -1.09921400 |
|     | C | -4.88660900 | -3.48508400 | -0.93615600 |
|     | H | -8.15570200 | -3.78702200 | -1.81142100 |
|     | H | -5.73637900 | -0.24446000 | -1.57418000 |
|     | H | -4.03457900 | -4.07873600 | -0.61650200 |
| 4g' | N | -0.27779400 | -0.93805200 | 0.06275700  |
|     | C | -0.40658900 | -2.39747600 | 0.20323900  |
|     | H | -0.21555300 | -2.66592500 | 1.24511800  |
|     | H | 0.31318900  | -2.90158000 | -0.44326200 |
|     | H | -1.40622000 | -2.70985700 | -0.07581200 |



|   |             |             |             |
|---|-------------|-------------|-------------|
| O | 0.68666400  | -5.34201500 | -0.97739200 |
| S | -0.44454000 | -5.88298800 | -0.17620800 |
| O | -0.67865800 | -7.32865300 | -0.39630400 |
| O | -1.68104300 | -5.07015100 | -0.31885200 |
| C | 0.08350700  | -5.72561700 | 1.54910700  |
| H | 0.47532800  | -4.70242000 | 1.62376100  |
| C | -1.10521700 | -5.91271800 | 2.49891400  |
| H | -0.73242100 | -6.32200700 | 3.44653500  |
| H | -1.77185900 | -6.67823300 | 2.08084500  |
| C | -1.89227100 | -4.63626500 | 2.79302100  |
| H | -1.21849200 | -3.90694700 | 3.26244800  |
| C | -3.08540200 | -4.89790500 | 3.70881800  |
| H | -2.23037000 | -4.19987600 | 1.84710800  |
| H | -3.79032300 | -5.59336500 | 3.23985900  |
| H | -3.62685400 | -3.97444800 | 3.93652200  |
| H | -2.76184800 | -5.34235000 | 4.65596100  |
| C | 1.22756700  | -6.70599000 | 1.82147100  |
| H | 1.88932300  | -6.74352700 | 0.94784400  |
| H | 0.80809300  | -7.71140700 | 1.94460100  |
| C | 2.05202000  | -6.32020400 | 3.04876700  |
| H | 2.51201900  | -5.33969200 | 2.87113400  |
| C | 3.13796400  | -7.34698300 | 3.35887100  |
| H | 1.39772000  | -6.20451500 | 3.92191500  |
| H | 2.69984000  | -8.32888800 | 3.56272900  |
| H | 3.72875000  | -7.05340600 | 4.23010300  |
| H | 3.82228300  | -7.45642700 | 2.51079000  |
| C | 0.95452700  | -0.35872400 | 0.20862000  |
| C | 1.12641700  | 1.00404300  | 0.12615600  |
| H | 2.12745300  | 1.39172400  | 0.24675600  |
| C | 0.01665200  | 1.85691900  | -0.11511600 |
| N | 0.15615700  | 3.18566900  | -0.20095600 |
| C | -1.24762700 | 1.22713000  | -0.25923300 |
| H | -2.14863900 | 1.79354400  | -0.44426500 |
| C | -1.36780100 | -0.14165800 | -0.16307500 |
| C | 1.47296200  | 3.79562000  | -0.04456200 |
| C | -1.00690600 | 4.02866000  | -0.45836700 |
| H | 1.37264400  | 4.87462900  | -0.13713400 |
| H | 2.16148800  | 3.44232600  | -0.81832600 |
| H | 1.89256600  | 3.56890300  | 0.94029800  |
| H | -1.46484000 | 3.77805800  | -1.42020300 |
| H | -0.68755800 | 5.06779000  | -0.48735300 |
| H | -1.75304300 | 3.91630600  | 0.33404000  |
| C | 2.04396100  | -1.24418800 | 0.44706300  |
| C | 2.90164400  | -2.07867600 | 0.63581200  |
| C | 6.00543800  | -3.88429300 | 1.63969600  |
| C | 5.70799300  | -5.17023900 | 1.18702300  |
| C | 4.49255200  | -5.42837400 | 0.55253700  |
| C | 3.86639100  | -3.11618400 | 0.82858200  |
| C | 5.09164200  | -2.85319600 | 1.45944600  |

|     |   |             |             |             |
|-----|---|-------------|-------------|-------------|
|     | H | 6.95286000  | -3.68536700 | 2.13038500  |
|     | H | 4.26656600  | -6.42875100 | 0.19454400  |
|     | C | 3.56236400  | -4.41022000 | 0.37363400  |
|     | H | 6.42667500  | -5.97119700 | 1.32698600  |
|     | H | 5.31391100  | -1.84846700 | 1.80396900  |
|     | H | 2.60602600  | -4.60783500 | -0.11046800 |
|     | C | -2.63571400 | -0.77945800 | -0.28433700 |
|     | C | -3.68501800 | -1.36956800 | -0.41566100 |
|     | C | -7.25962900 | -2.35734400 | -0.78744700 |
|     | C | -7.14027300 | -3.74689100 | -0.76827000 |
|     | C | -5.88662400 | -4.34468600 | -0.63552600 |
|     | C | -4.86831100 | -2.16127700 | -0.53954500 |
|     | C | -6.12799000 | -1.55983700 | -0.67371000 |
|     | H | -8.23554600 | -1.89500600 | -0.89209600 |
|     | H | -5.79756400 | -5.42602000 | -0.62245900 |
|     | C | -4.74518300 | -3.56095000 | -0.52121300 |
|     | H | -8.02705600 | -4.36564700 | -0.85602000 |
|     | H | -6.20803000 | -0.47797700 | -0.68650800 |
|     | H | -3.76235400 | -4.01870300 | -0.42420800 |
| 3h' | N | -0.18873400 | -1.23975900 | -0.18511100 |
|     | C | -0.50196800 | -4.14326400 | -0.62671900 |
|     | H | 0.33531600  | -3.85511500 | 0.01188200  |
|     | H | -0.27243000 | -3.90411100 | -1.66320000 |
|     | H | -1.41272000 | -3.62613500 | -0.32131200 |
|     | O | -0.68727300 | -5.58137100 | -0.58280600 |
|     | S | -1.55437700 | -6.15727300 | 0.63947800  |
|     | O | -1.57850800 | -7.59589000 | 0.42880000  |
|     | O | -2.81785600 | -5.43078600 | 0.70159500  |
|     | C | -0.55143500 | -5.76638700 | 2.08052100  |
|     | H | -0.44796500 | -4.67286500 | 2.05410400  |
|     | C | -1.30106800 | -6.19171800 | 3.35380400  |
|     | H | -0.54023800 | -6.31729000 | 4.13350600  |
|     | H | -1.73605500 | -7.18797100 | 3.19534500  |
|     | C | -2.36180800 | -5.20947100 | 3.84710800  |
|     | H | -1.89278200 | -4.22921400 | 4.00734600  |
|     | C | -3.01530300 | -5.67669500 | 5.14658300  |
|     | H | -3.12940000 | -5.06964600 | 3.07920600  |
|     | H | -3.47380600 | -6.66030400 | 4.98531200  |
|     | C | -4.06838500 | -4.69384300 | 5.65245800  |
|     | H | -2.24170300 | -5.81777300 | 5.91148500  |
|     | C | 0.82048700  | -6.43875600 | 1.94493900  |
|     | H | 1.13797600  | -6.46274700 | 0.89619000  |
|     | H | 0.72943700  | -7.48089600 | 2.27399600  |
|     | C | 1.88574300  | -5.70638300 | 2.76125500  |
|     | H | 2.08596800  | -4.73255000 | 2.29111800  |
|     | C | 3.18565600  | -6.50114600 | 2.85588500  |
|     | H | 1.51570000  | -5.49370800 | 3.77339200  |
|     | H | 3.00037600  | -7.42500900 | 3.41761900  |
|     | C | 4.30532000  | -5.70059200 | 3.51140500  |

|   |             |             |             |
|---|-------------|-------------|-------------|
| H | 3.49378400  | -6.80556600 | 1.84809000  |
| C | 0.98235300  | -0.69316300 | 0.17773900  |
| C | 1.17835000  | 0.66079000  | 0.43620600  |
| H | 2.16416600  | 1.00219000  | 0.72151700  |
| C | 0.08804400  | 1.55110700  | 0.31661300  |
| N | 0.22079000  | 2.88168100  | 0.54882100  |
| C | -1.14903200 | 0.97952100  | -0.05571500 |
| H | -2.04394600 | 1.57791700  | -0.16113100 |
| C | -1.22442800 | -0.39106200 | -0.28611600 |
| C | 1.51167600  | 3.42388500  | 0.93727900  |
| C | -0.92916800 | 3.75864900  | 0.40655800  |
| H | 1.41525300  | 4.49873400  | 1.08055100  |
| H | 2.26812700  | 3.24632100  | 0.16447900  |
| H | 1.86409700  | 2.98228100  | 1.87651300  |
| H | -1.33966100 | 3.71386400  | -0.60862200 |
| H | -0.62021600 | 4.78343700  | 0.60534900  |
| H | -1.72340300 | 3.49435700  | 1.11431000  |
| C | 2.09469700  | -1.60248800 | 0.28933500  |
| C | 3.02717800  | -2.37018100 | 0.38598800  |
| C | 6.45668800  | -3.67903900 | 1.05132700  |
| C | 6.33760600  | -4.98906500 | 0.58840300  |
| C | 5.12411600  | -5.43721400 | 0.06861200  |
| C | 4.14518400  | -3.26240700 | 0.47212800  |
| C | 5.36928600  | -2.81534600 | 0.99381500  |
| H | 7.40033200  | -3.32805200 | 1.45591000  |
| H | 5.02938700  | -6.45565300 | -0.29396500 |
| C | 4.02857600  | -4.58262000 | 0.01236800  |
| H | 7.18965800  | -5.65936800 | 0.63206700  |
| H | 5.45565500  | -1.79339100 | 1.34728200  |
| H | 3.07997700  | -4.92420300 | -0.39222800 |
| C | -2.48624600 | -0.98152200 | -0.65393300 |
| C | -3.53983200 | -1.49609800 | -0.95848300 |
| C | -7.02011400 | -1.98276000 | -2.21144500 |
| C | -7.18362900 | -3.35332600 | -2.01509700 |
| C | -6.14679400 | -4.10831000 | -1.46846100 |
| C | -4.77831400 | -2.12297800 | -1.31615700 |
| C | -5.82399200 | -1.36566100 | -1.86438600 |
| H | -7.82624400 | -1.39347700 | -2.63608800 |
| H | -6.27438700 | -5.17461500 | -1.31274900 |
| C | -4.94573000 | -3.50211000 | -1.11810500 |
| H | -8.11870800 | -3.83235600 | -2.28670100 |
| H | -5.68803000 | -0.29977500 | -2.01448600 |
| H | -4.13861900 | -4.08425700 | -0.68248700 |
| H | -4.52986500 | -5.04372700 | 6.57993500  |
| H | -4.86157600 | -4.55879400 | 4.91070700  |
| H | -3.62362200 | -3.71223200 | 5.84600300  |
| H | 4.50179700  | -4.78264900 | 2.94682100  |
| H | 5.23619200  | -6.27275300 | 3.55190800  |
| H | 4.03592600  | -5.41794800 | 4.53453600  |

|       |   |             |             |             |
|-------|---|-------------|-------------|-------------|
| TS-h' | N | -0.17514200 | -1.28021500 | -0.13125600 |
|       | C | -0.43236700 | -3.28090500 | -0.29803300 |
|       | H | 0.46644000  | -3.41461900 | 0.28538800  |
|       | H | -0.35652500 | -3.18911400 | -1.37064600 |
|       | H | -1.39697300 | -3.16548300 | 0.17569400  |
|       | O | -0.63680000 | -5.13896500 | -0.49367400 |
|       | S | -1.50460700 | -5.81737500 | 0.56790300  |
|       | O | -1.65003600 | -7.24584400 | 0.26174600  |
|       | O | -2.75966000 | -5.06536300 | 0.75742300  |
|       | C | -0.54451200 | -5.67777400 | 2.08706700  |
|       | H | -0.42490900 | -4.59548400 | 2.23416500  |
|       | C | -1.29829200 | -6.28748200 | 3.27494500  |
|       | H | -0.55219700 | -6.47911900 | 4.05702700  |
|       | H | -1.67917800 | -7.27153800 | 2.97103900  |
|       | C | -2.42344000 | -5.44218200 | 3.86811400  |
|       | H | -2.02570500 | -4.45615300 | 4.14602600  |
|       | C | -3.04317200 | -6.10078900 | 5.09877200  |
|       | H | -3.19489500 | -5.26809600 | 3.11182400  |
|       | H | -3.42026100 | -7.09418400 | 4.82384100  |
|       | C | -4.17447800 | -5.26915600 | 5.69712600  |
|       | H | -2.26440300 | -6.26498700 | 5.85448700  |
|       | C | 0.82678000  | -6.33610700 | 1.88870700  |
|       | H | 1.14826300  | -6.23829800 | 0.84618000  |
|       | H | 0.72718600  | -7.40929100 | 2.09335100  |
|       | C | 1.89453000  | -5.71689100 | 2.79044900  |
|       | H | 2.12624100  | -4.70691600 | 2.42105400  |
|       | C | 3.17574200  | -6.54578800 | 2.83387500  |
|       | H | 1.50925600  | -5.59203100 | 3.81136300  |
|       | H | 2.96496200  | -7.50539300 | 3.32221200  |
|       | C | 4.30908900  | -5.82390200 | 3.55551700  |
|       | H | 3.48538800  | -6.78102300 | 1.80825200  |
|       | C | 1.01585000  | -0.73018800 | 0.17420200  |
|       | C | 1.21431100  | 0.63680600  | 0.30476000  |
|       | H | 2.20563700  | 0.99167500  | 0.54991800  |
|       | C | 0.13095300  | 1.52510700  | 0.10712200  |
|       | N | 0.27670200  | 2.86240500  | 0.22127200  |
|       | C | -1.11288000 | 0.93505000  | -0.21753200 |
|       | H | -2.00002200 | 1.52929200  | -0.38688100 |
|       | C | -1.21481200 | -0.44484900 | -0.32137800 |
|       | C | 1.57505000  | 3.42509900  | 0.56072700  |
|       | C | -0.86184100 | 3.73935000  | -0.00876400 |
|       | H | 1.48220600  | 4.50648700  | 0.63401800  |
|       | H | 2.32170400  | 3.19261600  | -0.20621500 |
|       | H | 1.93058900  | 3.04395200  | 1.52355500  |
|       | H | -1.25829900 | 3.61536100  | -1.02211100 |
|       | H | -0.54068000 | 4.77212600  | 0.11007500  |
|       | H | -1.66472100 | 3.54198600  | 0.70962000  |
|       | C | 2.12829400  | -1.62118000 | 0.35454500  |
|       | C | 3.08711600  | -2.34984500 | 0.48445100  |

|     |   |             |             |             |
|-----|---|-------------|-------------|-------------|
|     | C | 6.51423100  | -3.61047200 | 1.24118400  |
|     | C | 6.43118700  | -4.91259500 | 0.74875700  |
|     | C | 5.24275100  | -5.37165700 | 0.18316800  |
|     | C | 4.21731700  | -3.22245800 | 0.59717600  |
|     | C | 5.41495200  | -2.76337300 | 1.16635300  |
|     | H | 7.43903900  | -3.25280900 | 1.68132100  |
|     | H | 5.17664000  | -6.38471800 | -0.19991400 |
|     | C | 4.13493800  | -4.53486600 | 0.10914400  |
|     | H | 7.29295400  | -5.56938100 | 0.80531900  |
|     | H | 5.47287300  | -1.74698000 | 1.54086400  |
|     | H | 3.20418800  | -4.88325000 | -0.32923100 |
|     | C | -2.48424600 | -1.03401200 | -0.64375700 |
|     | C | -3.56674400 | -1.50921300 | -0.90770400 |
|     | C | -7.08068400 | -1.81084000 | -2.10646900 |
|     | C | -7.33161300 | -3.15991000 | -1.85823800 |
|     | C | -6.34198800 | -3.96271400 | -1.29258600 |
|     | C | -4.84549800 | -2.07095800 | -1.22641400 |
|     | C | -5.84299500 | -1.26321300 | -1.79251000 |
|     | H | -7.85046000 | -1.18463100 | -2.54502200 |
|     | H | -6.54020700 | -5.01146200 | -1.09699500 |
|     | C | -5.09867400 | -3.42802800 | -0.97418800 |
|     | H | -8.29953500 | -3.58477100 | -2.10381600 |
|     | H | -5.63722300 | -0.21510800 | -1.98272500 |
|     | H | -4.32336800 | -4.04313200 | -0.52518800 |
|     | H | -4.61267300 | -5.75559000 | 6.57253000  |
|     | H | -4.97182500 | -5.11408300 | 4.96344700  |
|     | H | -3.81150500 | -4.28371400 | 6.00612100  |
|     | H | 4.53636600  | -4.87495200 | 3.05653200  |
|     | H | 5.22453200  | -6.42203000 | 3.56768400  |
|     | H | 4.03439400  | -5.60326300 | 4.59263100  |
| 4h' | N | -0.28427400 | -1.35555100 | -0.04809900 |
|     | C | -0.44717100 | -2.79518000 | -0.32233700 |
|     | H | 0.46440100  | -3.31736700 | -0.04899700 |
|     | H | -0.64108200 | -2.94076400 | -1.38596200 |
|     | H | -1.28936400 | -3.18653700 | 0.24943100  |
|     | O | -0.53078100 | -5.69319200 | -0.71711100 |
|     | S | -1.41698700 | -6.04887700 | 0.42053900  |
|     | O | -1.76428200 | -7.48726300 | 0.47210400  |
|     | O | -2.60695000 | -5.15660900 | 0.50600200  |
|     | C | -0.43901100 | -5.72669800 | 1.90946100  |
|     | H | -0.19555900 | -4.65667800 | 1.85311700  |
|     | C | -1.24327000 | -6.01130000 | 3.18331900  |
|     | H | -0.52854600 | -6.21075500 | 3.99261900  |
|     | H | -1.80289400 | -6.94508200 | 3.03551200  |
|     | C | -2.18599900 | -4.89530100 | 3.63299000  |
|     | H | -1.60780600 | -3.96967100 | 3.77105000  |
|     | C | -2.90458000 | -5.23737300 | 4.93666600  |
|     | H | -2.91736700 | -4.69505900 | 2.84329600  |
|     | H | -3.46833200 | -6.16963800 | 4.80141800  |

|   |             |             |             |
|---|-------------|-------------|-------------|
| C | -3.84820000 | -4.12805200 | 5.39657600  |
| H | -2.16111000 | -5.43848200 | 5.71896400  |
| C | 0.85735500  | -6.54043200 | 1.84865800  |
| H | 1.21130700  | -6.58202600 | 0.81235000  |
| H | 0.64197400  | -7.57212200 | 2.15689800  |
| C | 1.96141200  | -5.94219200 | 2.71756100  |
| H | 2.21287500  | -4.94358400 | 2.33027500  |
| C | 3.22447900  | -6.79858000 | 2.74345600  |
| H | 1.60599200  | -5.79262000 | 3.74602100  |
| H | 2.99429100  | -7.77106500 | 3.19665000  |
| C | 4.36339000  | -6.12187100 | 3.49963800  |
| H | 3.53806400  | -7.00374500 | 1.71205400  |
| C | 0.91733800  | -0.82069800 | 0.32514000  |
| C | 1.06849700  | 0.53381700  | 0.53085100  |
| H | 2.04719600  | 0.88609700  | 0.82215800  |
| C | -0.02295900 | 1.42314300  | 0.35219800  |
| N | 0.10733300  | 2.74462900  | 0.52119800  |
| C | -1.26129300 | 0.83481900  | -0.01327600 |
| H | -2.15605000 | 1.42462900  | -0.15046500 |
| C | -1.36145900 | -0.52527500 | -0.20329900 |
| C | 1.39690200  | 3.31001100  | 0.90396400  |
| C | -1.03673900 | 3.62550900  | 0.30758800  |
| H | 1.28951800  | 4.38662900  | 1.01018200  |
| H | 2.15377700  | 3.10891300  | 0.13996800  |
| H | 1.73463800  | 2.89938000  | 1.85991400  |
| H | -1.42305900 | 3.52110200  | -0.71050600 |
| H | -0.71820500 | 4.65505100  | 0.45166100  |
| H | -1.83788700 | 3.40554600  | 1.01953700  |
| C | 2.03299300  | -1.69278000 | 0.49459400  |
| C | 3.02417300  | -2.37953900 | 0.61180800  |
| C | 6.45933100  | -3.64422400 | 1.31466800  |
| C | 6.39128900  | -4.91428600 | 0.74359100  |
| C | 5.20892900  | -5.35396100 | 0.14920400  |
| C | 4.16189200  | -3.24466900 | 0.68542900  |
| C | 5.35135100  | -2.80562300 | 1.28620000  |
| H | 7.37877700  | -3.30448900 | 1.77950100  |
| H | 5.15537400  | -6.34311700 | -0.29287000 |
| C | 4.09134700  | -4.52781300 | 0.12177800  |
| H | 7.26067800  | -5.56309300 | 0.76391500  |
| H | 5.39730400  | -1.81268800 | 1.72002800  |
| H | 3.16446900  | -4.86070500 | -0.33653100 |
| C | -2.60148900 | -1.12287700 | -0.56552600 |
| C | -3.65392900 | -1.63483800 | -0.87829700 |
| C | -7.17131300 | -2.10573100 | -2.00280300 |
| C | -7.27805600 | -3.49488600 | -1.94671800 |
| C | -6.19247400 | -4.26663900 | -1.53407200 |
| C | -4.88674800 | -2.26240300 | -1.23955300 |
| C | -5.97938700 | -1.48480100 | -1.65130400 |
| H | -8.01811100 | -1.50675900 | -2.31994700 |

|       |   |             |              |             |
|-------|---|-------------|--------------|-------------|
|       | H | -6.28133200 | -5.34666100  | -1.48766200 |
|       | C | -4.99319800 | -3.66060500  | -1.17770800 |
|       | H | -8.21066800 | -3.97660000  | -2.22255400 |
|       | H | -5.88345700 | -0.40529400  | -1.69114000 |
|       | H | -4.14466600 | -4.24891200  | -0.83664500 |
|       | H | -4.35651500 | -4.39135300  | 6.32845200  |
|       | H | -4.61410500 | -3.93132800  | 4.63947700  |
|       | H | -3.30033200 | -3.19443400  | 5.56404200  |
|       | H | 4.59681200  | -5.15087400  | 3.04867900  |
|       | H | 5.27511900  | -6.72567500  | 3.48468700  |
|       | H | 4.08842200  | -5.94977700  | 4.54554200  |
| 15-3a | O | -0.16278800 | -5.23541400  | -0.76160200 |
|       | C | -0.15453900 | -3.80106500  | -0.53163100 |
|       | H | 0.22606400  | -3.57190000  | 0.46584100  |
|       | H | 0.52647300  | -3.39486900  | -1.27669400 |
|       | H | -1.15353400 | -3.38536000  | -0.66248400 |
|       | N | -0.00216500 | -0.85649700  | -0.23747200 |
|       | S | -1.17148900 | -6.12883800  | 0.09779400  |
|       | O | -1.20365300 | -7.41766800  | -0.57328600 |
|       | O | -2.41348800 | -5.39520800  | 0.29928000  |
|       | C | -0.34017900 | -6.29668900  | 1.65475600  |
|       | H | -0.23744900 | -5.31144600  | 2.10978100  |
|       | H | 0.63216700  | -6.75401000  | 1.47678900  |
|       | H | -0.96209700 | -6.93775500  | 2.28029000  |
|       | C | 1.16333700  | -0.20386400  | -0.10610500 |
|       | C | 1.31073900  | 1.17884800   | -0.15412900 |
|       | H | 2.29922700  | 1.60253800   | -0.03851600 |
|       | C | 0.16761300  | 1.98759700   | -0.31324400 |
|       | N | 0.24938700  | 3.34397100   | -0.34245800 |
|       | C | -1.06388100 | 1.31315400   | -0.43956900 |
|       | H | -1.99488900 | 1.84448200   | -0.58423400 |
|       | C | -1.08257100 | -0.07814400  | -0.41197300 |
|       | C | 1.54777000  | 3.98924100   | -0.26770500 |
|       | C | -0.96012600 | 4.13558500   | -0.47571100 |
|       | H | 1.41127500  | 5.06852600   | -0.31018700 |
|       | H | 2.19098700  | 3.68893800   | -1.10372100 |
|       | H | 2.06307400  | 3.74316800   | 0.66835300  |
|       | H | -1.48180800 | 3.91614500   | -1.41497300 |
|       | H | -0.69686800 | 5.19187100   | -0.46793500 |
|       | H | -1.65166100 | 3.94614200   | 0.35364800  |
|       | C | -6.89839100 | -10.22836700 | -1.81355100 |
|       | C | 6.40798500  | -1.51890900  | -2.73938700 |
|       | C | 5.14632400  | -0.97348600  | -2.94189200 |
|       | C | 4.01142700  | -1.80119700  | -2.93951800 |
|       | C | 5.43220600  | -3.72099700  | -2.51470700 |
|       | C | 6.55787400  | -2.88496300  | -2.52688300 |
|       | H | 7.28097500  | -0.87492900  | -2.74117400 |
|       | C | 2.71570300  | -1.22544200  | -3.14616300 |
|       | C | 1.63979700  | -0.69323200  | -3.31732800 |

|   |             |              |             |
|---|-------------|--------------|-------------|
| C | -0.83160100 | 2.05526500   | -3.78582900 |
| C | -2.01769000 | 1.34280200   | -3.92456700 |
| C | -2.00775200 | -0.05985800  | -3.86433100 |
| C | 0.39366400  | -0.01489700  | -3.51788600 |
| C | 0.37050200  | 1.38709700   | -3.58452900 |
| H | -0.84316500 | 3.13911400   | -3.83965800 |
| C | -5.68488400 | -10.89925600 | -1.72368200 |
| C | -4.49349700 | -10.17714400 | -1.54568600 |
| C | -5.75990000 | -8.10882000  | -1.53828300 |
| C | -6.94258600 | -8.84036700  | -1.72473200 |
| H | -7.81724900 | -10.78883800 | -1.95355500 |
| C | -3.24148800 | -10.86894200 | -1.48328200 |
| C | -2.19144500 | -11.47273600 | -1.45000800 |
| C | 0.30390400  | -14.24348300 | -1.30235400 |
| C | 1.49885300  | -13.53555600 | -1.35112900 |
| C | 1.48094400  | -12.13447800 | -1.43404200 |
| C | -0.94427500 | -12.17482900 | -1.41370400 |
| C | -0.91525700 | -13.57449700 | -1.33410700 |
| H | 0.32186800  | -15.32613800 | -1.23376700 |
| C | 2.70074000  | -11.38733900 | -1.48629900 |
| C | 3.71787900  | -10.73023500 | -1.52994900 |
| C | 7.29314600  | -9.65157800  | -1.48188500 |
| C | 7.16336900  | -8.28479300  | -1.69861700 |
| C | 5.88944300  | -7.71860300  | -1.86553600 |
| C | 4.89229200  | -9.91354200  | -1.58613700 |
| C | 6.16891200  | -10.46971700 | -1.42647800 |
| H | 8.27934400  | -10.08441700 | -1.35091700 |
| C | 5.58742200  | -5.12645100  | -2.28774200 |
| C | 5.73602900  | -6.31341200  | -2.09355600 |
| C | 4.15930400  | -3.17433500  | -2.72142800 |
| C | -0.79902300 | -0.73387800  | -3.65467300 |
| C | -4.53467800 | -8.78186900  | -1.44505200 |
| C | 0.25730300  | -11.45875100 | -1.45976900 |
| C | 4.75837900  | -8.53715700  | -1.80351300 |
| H | 5.02453700  | 0.09192600   | -3.10578800 |
| H | 7.53972300  | -3.31489400  | -2.36044400 |
| H | -2.95715000 | 1.86036600   | -4.08682300 |
| H | 1.29816900  | 1.93855600   | -3.47020400 |
| H | -5.64412100 | -11.98070000 | -1.79861300 |
| H | -7.88782300 | -8.31044000  | -1.78752400 |
| H | 2.45058600  | -14.05547200 | -1.32610400 |
| H | -1.84904800 | -14.12463200 | -1.28890600 |
| H | 8.03955300  | -7.64679900  | -1.74080100 |
| H | 6.26870800  | -11.53550100 | -1.25128900 |
| H | 3.28570200  | -3.81749700  | -2.70659600 |
| H | -0.78822400 | -1.81709100  | -3.59406000 |
| H | -3.61650000 | -8.22236400  | -1.29082900 |
| H | 0.23691200  | -10.37501600 | -1.50923900 |
| H | 3.77103900  | -8.10392200  | -1.92255600 |



|    |             |              |             |
|----|-------------|--------------|-------------|
| C  | -5.80731600 | -6.68205100  | -1.44001800 |
| C  | -5.85730800 | -5.47367600  | -1.36110800 |
| C  | -2.34075200 | -0.75350100  | -0.58575600 |
| C  | -3.41219300 | -1.29709600  | -0.74080300 |
| C  | -7.05583300 | -1.94018700  | -1.22865500 |
| C  | -7.07101500 | -3.32570500  | -1.33772700 |
| C  | -5.87108400 | -4.04738500  | -1.24530300 |
| C  | -4.65784100 | -1.97393000  | -0.93420900 |
| C  | -5.85854500 | -1.25905500  | -1.03272500 |
| H  | -7.98477000 | -1.38443100  | -1.30746200 |
| C  | -4.66728600 | -3.36865000  | -1.03875600 |
| H  | -8.00214700 | -3.85665800  | -1.50597600 |
| H  | -5.84430400 | -0.17718000  | -0.95038300 |
| H  | -3.74304800 | -3.92979900  | -0.94472200 |
| C  | -7.89167600 | -2.04648200  | -4.73288300 |
| C  | -4.25665400 | -1.41201900  | -4.19959500 |
| C  | -3.22627500 | -0.79531500  | -4.03312300 |
| C  | -7.91060300 | -3.42704000  | -4.89823200 |
| C  | -6.71649600 | -4.16037900  | -4.82655800 |
| C  | -5.49192800 | -2.10542200  | -4.41721100 |
| C  | -6.69288000 | -1.38350900  | -4.50095700 |
| H  | -8.81708900 | -1.48331300  | -4.79114700 |
| C  | -5.51035600 | -3.49616500  | -4.57434200 |
| H  | -8.84244800 | -3.94671600  | -5.09392100 |
| H  | -6.67291500 | -0.30590000  | -4.37640100 |
| H  | -4.58569700 | -4.06028500  | -4.51199300 |
| C  | -6.73216000 | -5.57631700  | -5.06498300 |
| C  | -6.76842600 | -6.76784900  | -5.31689500 |
| Si | -6.83439200 | -8.54455400  | -5.83522900 |
| C  | -8.42955900 | -9.30112500  | -5.19784700 |
| C  | -5.33429600 | -9.43383200  | -5.15192000 |
| C  | -6.81433400 | -8.58489900  | -7.71351500 |
| H  | -9.30057000 | -8.79952300  | -5.62890100 |
| H  | -8.49559200 | -9.23320000  | -4.10927400 |
| H  | -8.47490100 | -10.35931100 | -5.47508800 |
| H  | -5.29306700 | -9.35888500  | -4.06214200 |
| H  | -4.41148600 | -9.01386000  | -5.56212700 |
| H  | -5.37362600 | -10.49490800 | -5.41903500 |
| H  | -5.89865800 | -8.13420800  | -8.10614500 |
| H  | -7.66882800 | -8.04498600  | -8.13074800 |
| H  | -6.86124800 | -9.62005600  | -8.06647400 |
| C  | 6.29462000  | -10.69679500 | 2.03626800  |
| C  | -6.36554000 | -0.77810600  | 2.35295100  |
| C  | -5.06650700 | -0.31256100  | 2.51459500  |
| C  | -3.99071000 | -1.21528000  | 2.53253700  |
| C  | -5.54622700 | -3.04995400  | 2.22611100  |
| C  | -6.61195900 | -2.13931800  | 2.21158500  |
| H  | -7.19209500 | -0.07562500  | 2.33438400  |
| C  | 5.04075800  | -11.29691100 | 2.03629900  |

|   |             |              |            |
|---|-------------|--------------|------------|
| C | 3.89103200  | -10.52075900 | 1.81978500 |
| C | 5.28107200  | -8.54276500  | 1.60105700 |
| C | 6.42220500  | -9.32794600  | 1.82013600 |
| H | 7.18113500  | -11.29945100 | 2.20589900 |
| C | 2.58971400  | -11.11746400 | 1.83602900 |
| C | 1.47936300  | -11.60214300 | 1.86339700 |
| C | -1.30412100 | -14.07842300 | 2.06888200 |
| C | -2.41506800 | -13.24540300 | 2.00399100 |
| C | -2.24571700 | -11.85663300 | 1.89084400 |
| C | 0.16146300  | -12.16092100 | 1.90364700 |
| C | -0.01998700 | -13.54620000 | 2.02311000 |
| H | -1.43969800 | -15.15140300 | 2.15491200 |
| C | -3.37880400 | -10.98271800 | 1.84004200 |
| C | -4.32326700 | -10.22461100 | 1.79971800 |
| C | -7.80222300 | -8.89384200  | 1.57435400 |
| C | -7.57807200 | -7.52769400  | 1.69180000 |
| C | -6.26967200 | -7.04150400  | 1.84308700 |
| C | -5.42794700 | -9.31489800  | 1.75604600 |
| C | -6.73854100 | -9.78981900  | 1.60845600 |
| H | -8.81413800 | -9.26554700  | 1.45190900 |
| C | -5.80010000 | -4.45188500  | 2.08614700 |
| C | -6.02345400 | -5.63726100  | 1.97140100 |
| C | -4.23449900 | -2.58346200  | 2.37925200 |
| C | 4.01796900  | -9.14584800  | 1.59719800 |
| C | -0.95545800 | -11.32026300 | 1.83352900 |
| C | -5.19788900 | -7.93821000  | 1.86641300 |
| H | -4.87021300 | 0.74825400   | 2.62821400 |
| H | -7.62339800 | -2.50865500  | 2.08071800 |
| H | 4.93828800  | -12.36292600 | 2.20852600 |
| H | 7.39954300  | -8.85617900  | 1.81125000 |
| H | -3.41763000 | -13.65753200 | 2.04527200 |
| H | 0.84903200  | -14.19362000 | 2.06993100 |
| H | -8.40613000 | -6.82746300  | 1.66684100 |
| H | -6.91046800 | -10.85633400 | 1.51067700 |
| H | -3.40684900 | -3.28505400  | 2.36479200 |
| H | 3.13280200  | -8.54347000  | 1.42301300 |
| H | -0.82087800 | -10.24880300 | 1.72596000 |
| H | -4.18454000 | -7.56340900  | 1.96511300 |
| C | 5.39979100  | -7.13201700  | 1.39799800 |
| C | 5.50544200  | -5.93625700  | 1.23347800 |
| C | 2.33790900  | -1.00601300  | 0.10935500 |
| C | 3.34564000  | -1.64401600  | 0.31910000 |
| C | 6.92915600  | -2.50779000  | 0.88171500 |
| C | 6.84949200  | -3.87965900  | 1.08376500 |
| C | 5.60423100  | -4.52469300  | 1.02609800 |
| C | 4.53420100  | -2.39985600  | 0.56768200 |
| C | 5.78114400  | -1.76388800  | 0.62844400 |
| H | 7.89231800  | -2.01065600  | 0.93579300 |
| C | 4.45001200  | -3.78180400  | 0.76539200 |

|         |    |             |              |             |
|---------|----|-------------|--------------|-------------|
|         | H  | 7.74035900  | -4.46048000  | 1.29856000  |
|         | H  | 5.83861400  | -0.69094200  | 0.47746200  |
|         | H  | 3.48624100  | -4.27838700  | 0.71291100  |
|         | C  | -2.65527900 | -0.72233900  | 2.69310800  |
|         | C  | -1.54027500 | -0.26633500  | 2.82792800  |
|         | C  | 1.14063000  | 2.30519900   | 3.10427300  |
|         | C  | 2.26943200  | 1.51321600   | 3.28533400  |
|         | C  | 2.14990000  | 0.11481800   | 3.32349900  |
|         | C  | -0.24419200 | 0.32395700   | 2.98353700  |
|         | C  | -0.11175100 | 1.72081100   | 2.95548700  |
|         | H  | 1.23666600  | 3.38599100   | 3.08205500  |
|         | C  | 0.89003800  | -0.47505200  | 3.16718000  |
|         | H  | 3.24772700  | 1.96616100   | 3.40650100  |
|         | H  | -0.99461000 | 2.33429400   | 2.80645200  |
|         | H  | 0.79394200  | -1.55563200  | 3.18322000  |
|         | C  | 7.89839700  | -2.17816300  | 4.29322800  |
|         | C  | 4.30156800  | -1.36499200  | 3.74884300  |
|         | C  | 3.30993500  | -0.69876700  | 3.54151800  |
|         | C  | 7.83832800  | -3.54312100  | 4.55157900  |
|         | C  | 6.60282900  | -4.20734300  | 4.54341200  |
|         | C  | 5.49451700  | -2.11652600  | 4.00760300  |
|         | C  | 6.73695100  | -1.46295300  | 4.02986600  |
|         | H  | 8.85577700  | -1.66810700  | 4.30346200  |
|         | C  | 5.43341600  | -3.49210700  | 4.25795600  |
|         | H  | 8.74052700  | -4.10327100  | 4.77266800  |
|         | H  | 6.77766000  | -0.39691600  | 3.83233400  |
|         | H  | 4.47715200  | -4.00425400  | 4.24065200  |
|         | C  | 6.54829300  | -5.60306800  | 4.87780200  |
|         | C  | 6.53217600  | -6.77348000  | 5.21680600  |
|         | Si | 6.52405100  | -8.51233300  | 5.85590100  |
|         | C  | 8.04109000  | -9.40194000  | 5.20191300  |
|         | C  | 4.94167600  | -9.35728000  | 5.31461800  |
|         | C  | 6.60104000  | -8.42664500  | 7.73110900  |
|         | H  | 8.95730800  | -8.91373900  | 5.54566500  |
|         | H  | 8.05240900  | -9.42713100  | 4.10992300  |
|         | H  | 8.05043700  | -10.43487500 | 5.56449700  |
|         | H  | 4.83433900  | -9.34358900  | 4.22685900  |
|         | H  | 4.06865200  | -8.86599000  | 5.75418900  |
|         | H  | 4.94535200  | -10.40176600 | 5.64295700  |
|         | H  | 5.74206900  | -7.88568400  | 8.13757900  |
|         | H  | 7.51297200  | -7.92551000  | 8.06711800  |
|         | H  | 6.59480300  | -9.43784600  | 8.15048300  |
| 15-TS-a | O  | 0.19720900  | -4.72576100  | -0.53878300 |
|         | C  | 0.07621000  | -2.87449300  | -0.37091000 |
|         | H  | 0.42468800  | -2.88131800  | 0.65157100  |
|         | H  | 0.80367000  | -2.77782800  | -1.16640100 |
|         | H  | -0.98061900 | -2.87349700  | -0.58174800 |
|         | N  | 0.03524500  | -0.83996100  | -0.26820100 |
|         | S  | -0.81954500 | -5.57031200  | 0.22816200  |

|   |             |              |             |
|---|-------------|--------------|-------------|
| O | -0.97291200 | -6.88244600  | -0.40925600 |
| O | -2.06298800 | -4.81570700  | 0.45998600  |
| C | -0.06871600 | -5.83250300  | 1.82021900  |
| H | 0.07369500  | -4.86431600  | 2.30185300  |
| H | 0.88966500  | -6.33119500  | 1.67544300  |
| H | -0.73728000 | -6.45433500  | 2.41583400  |
| C | 1.19606400  | -0.17627600  | -0.11592600 |
| C | 1.29764800  | 1.20576300   | -0.15266200 |
| H | 2.27238300  | 1.65408700   | -0.02035100 |
| C | 0.13023800  | 1.98346500   | -0.31717100 |
| N | 0.17609000  | 3.33472400   | -0.34653600 |
| C | -1.08735700 | 1.27928200   | -0.44719800 |
| H | -2.03121100 | 1.78661900   | -0.58577200 |
| C | -1.08129100 | -0.10838800  | -0.43652100 |
| C | 1.45798300  | 4.01690700   | -0.26699800 |
| C | -1.05572000 | 4.09751800   | -0.47050900 |
| H | 1.29233000  | 5.09049000   | -0.33062200 |
| H | 2.11508900  | 3.71807800   | -1.09147700 |
| H | 1.96625100  | 3.80016900   | 0.67942000  |
| H | -1.57482000 | 3.86449500   | -1.40710200 |
| H | -0.81756200 | 5.15925500   | -0.46337900 |
| H | -1.73403800 | 3.88856800   | 0.36426700  |
| C | -6.92445700 | -10.30200400 | -1.79177700 |
| C | 6.38974400  | -1.56001600  | -2.72514700 |
| C | 5.13329900  | -1.00442100  | -2.93060200 |
| C | 3.99246800  | -1.82417500  | -2.93229300 |
| C | 5.39566300  | -3.75530600  | -2.50758900 |
| C | 6.52791900  | -2.92777600  | -2.51536200 |
| H | 7.26784700  | -0.92318700  | -2.72353400 |
| C | 2.70248500  | -1.23713300  | -3.14367200 |
| C | 1.63109000  | -0.69671500  | -3.31787900 |
| C | -0.81463400 | 2.07796800   | -3.76329900 |
| C | -2.00630600 | 1.37675600   | -3.91436200 |
| C | -2.00732900 | -0.02666500  | -3.87548200 |
| C | 0.39288300  | -0.00552100  | -3.52005400 |
| C | 0.38171400  | 1.39760400   | -3.56807200 |
| H | -0.81700100 | 3.16262300   | -3.80217900 |
| C | -5.72217600 | -10.99417500 | -1.71363800 |
| C | -4.51697600 | -10.29325200 | -1.54501200 |
| C | -5.74712800 | -8.20198300  | -1.53058000 |
| C | -6.94393400 | -8.91368200  | -1.70288500 |
| H | -7.85431900 | -10.84633500 | -1.92266300 |
| C | -3.27406800 | -11.00130300 | -1.48602300 |
| C | -2.22184800 | -11.60110100 | -1.44863200 |
| C | 0.31301400  | -14.33668500 | -1.29009800 |
| C | 1.49727000  | -13.61121400 | -1.34296400 |
| C | 1.45850200  | -12.21103700 | -1.43298100 |
| C | -0.96615000 | -12.28801600 | -1.41045900 |
| C | -0.91617600 | -13.68650800 | -1.32407800 |

|   |             |              |             |
|---|-------------|--------------|-------------|
| H | 0.34749500  | -15.41862900 | -1.21629800 |
| C | 2.66721000  | -11.44627800 | -1.48948100 |
| C | 3.67747600  | -10.77890200 | -1.53694800 |
| C | 7.24791200  | -9.68639200  | -1.50157900 |
| C | 7.11280700  | -8.31953100  | -1.71383500 |
| C | 5.83627800  | -7.75698100  | -1.87440800 |
| C | 4.84686600  | -9.95509000  | -1.59696400 |
| C | 6.12609300  | -10.50764100 | -1.44407100 |
| H | 8.23577800  | -10.11656100 | -1.37490800 |
| C | 5.54094100  | -5.16254400  | -2.28621600 |
| C | 5.68208900  | -6.35103300  | -2.09661000 |
| C | 4.12726200  | -3.19843700  | -2.71455900 |
| C | -0.80447600 | -0.71334500  | -3.67208900 |
| C | -4.53402100 | -8.89718400  | -1.44622500 |
| C | 0.22473800  | -11.55426500 | -1.46158400 |
| C | 4.70760000  | -8.57866800  | -1.81072800 |
| H | 5.01985800  | 0.06182500   | -3.09391700 |
| H | 7.50593700  | -3.36589300  | -2.34854000 |
| H | -2.94113300 | 1.90428400   | -4.07161000 |
| H | 1.31362800  | 1.93990300   | -3.44487900 |
| H | -5.70137100 | -12.07608500 | -1.78819600 |
| H | -7.88056400 | -8.36761100  | -1.75601200 |
| H | 2.45671900  | -14.11667900 | -1.31548700 |
| H | -1.84150700 | -14.25054000 | -1.27564400 |
| H | 7.98652700  | -7.67836200  | -1.75709600 |
| H | 6.22956000  | -11.57344600 | -1.27153500 |
| H | 3.24809900  | -3.83476200  | -2.70061600 |
| H | -0.80203700 | -1.79764100  | -3.63016300 |
| H | -3.60618200 | -8.35285400  | -1.30045300 |
| H | 0.18927300  | -10.47145400 | -1.51818600 |
| H | 3.71839700  | -8.14781900  | -1.92407800 |
| C | -5.77016100 | -6.77407300  | -1.44424000 |
| C | -5.80454700 | -5.56473600  | -1.37745300 |
| C | -2.31798800 | -0.81194600  | -0.61626800 |
| C | -3.38122200 | -1.36811600  | -0.78035600 |
| C | -7.00898600 | -2.03264600  | -1.32371200 |
| C | -7.01462800 | -3.41918000  | -1.41464800 |
| C | -5.81535800 | -4.13672900  | -1.28368000 |
| C | -4.61911200 | -2.05625200  | -0.98329100 |
| C | -5.81830200 | -1.34443900  | -1.11454400 |
| H | -7.93809000 | -1.48243500  | -1.43071600 |
| C | -4.61736600 | -3.45321900  | -1.06015900 |
| H | -7.93980100 | -3.95612900  | -1.59644700 |
| H | -5.80692000 | -0.26136500  | -1.05167100 |
| H | -3.69005300 | -4.00079300  | -0.91937700 |
| C | -7.89264400 | -1.98746700  | -4.79569500 |
| C | -4.26117100 | -1.36338500  | -4.23481200 |
| C | -3.22847400 | -0.75340600  | -4.05886100 |
| C | -7.91688000 | -3.37044100  | -4.93850600 |

|    |             |              |             |
|----|-------------|--------------|-------------|
| C  | -6.72722700 | -4.10892500  | -4.84695400 |
| C  | -5.49636800 | -2.05415900  | -4.46057300 |
| C  | -6.69248300 | -1.32692300  | -4.56565700 |
| H  | -8.81491200 | -1.42106100  | -4.87011800 |
| C  | -5.51951700 | -3.44696600  | -4.59609600 |
| H  | -8.84992900 | -3.88877800  | -5.13214400 |
| H  | -6.66735800 | -0.24764300  | -4.45796900 |
| H  | -4.59791500 | -4.01374700  | -4.51706900 |
| C  | -6.75275500 | -5.52844500  | -5.06314300 |
| C  | -6.80070800 | -6.72257900  | -5.30074700 |
| Si | -6.88770100 | -8.50204700  | -5.80820900 |
| C  | -8.48568800 | -9.23885400  | -5.15458800 |
| C  | -5.39587700 | -9.41204300  | -5.13414800 |
| C  | -6.88249800 | -8.54735200  | -7.68647900 |
| H  | -9.35553100 | -8.72068500  | -5.56793700 |
| H  | -8.53389300 | -9.17974100  | -4.06457100 |
| H  | -8.55086900 | -10.29383100 | -5.43989700 |
| H  | -5.35378300 | -9.35272500  | -4.04337600 |
| H  | -4.46809500 | -8.99807800  | -5.53910400 |
| H  | -5.44783600 | -10.46905200 | -5.41486300 |
| H  | -5.96696600 | -8.10354800  | -8.08707000 |
| H  | -7.73655400 | -8.00241300  | -8.09820300 |
| H  | -6.93907600 | -9.58288200  | -8.03672200 |
| C  | 6.25553100  | -10.69595400 | 2.00249900  |
| C  | -6.34512000 | -0.87399400  | 2.27644000  |
| C  | -5.05327000 | -0.39241000  | 2.44742100  |
| C  | -3.96737300 | -1.28287300  | 2.47482800  |
| C  | -5.49604400 | -3.13634900  | 2.16599000  |
| C  | -6.57301000 | -2.23869700  | 2.13981500  |
| H  | -7.18018400 | -0.18198300  | 2.24943900  |
| C  | 5.00546800  | -11.30307500 | 2.01246800  |
| C  | 3.84896400  | -10.53360600 | 1.80753300  |
| C  | 5.22426100  | -8.54727500  | 1.57996000  |
| C  | 6.37222200  | -9.32590600  | 1.78812400  |
| H  | 7.14743300  | -11.29354800 | 2.16149600  |
| C  | 2.55427300  | -11.14453000 | 1.83347600  |
| C  | 1.45260400  | -11.64786100 | 1.86473600  |
| C  | -1.29219300 | -14.16706400 | 2.07864300  |
| C  | -2.41589800 | -13.35142800 | 2.01339300  |
| C  | -2.26754900 | -11.96059200 | 1.89816900  |
| C  | 0.14394800  | -12.22785600 | 1.90876200  |
| C  | -0.01620100 | -13.61568400 | 2.03008100  |
| H  | -1.41116700 | -15.24188100 | 2.16666200  |
| C  | -3.41090100 | -11.10047000 | 1.84543800  |
| C  | -4.35717100 | -10.34496600 | 1.80382600  |
| C  | -7.81388200 | -8.95017300  | 1.59226300  |
| C  | -7.55963000 | -7.58797200  | 1.69177000  |
| C  | -6.24023600 | -7.12751000  | 1.82949400  |
| C  | -5.44817600 | -9.41917300  | 1.76196300  |

|   |             |              |            |
|---|-------------|--------------|------------|
| C | -6.76912200 | -9.86833600  | 1.62800400 |
| H | -8.83452900 | -9.30135500  | 1.48125700 |
| C | -5.73725100 | -4.54130500  | 2.03627600 |
| C | -5.96855300 | -5.72667800  | 1.93835600 |
| C | -4.19049500 | -2.65473100  | 2.32170000 |
| C | 3.96430200  | -9.15738100  | 1.58598000 |
| C | -0.98562400 | -11.40461800 | 1.83977300 |
| C | -5.18821300 | -8.04649800  | 1.85754300 |
| H | -4.87016300 | 0.67074600   | 2.56098000 |
| H | -7.57891800 | -2.62167900  | 2.00537100 |
| H | 4.91066600  | -12.37009800 | 2.18267600 |
| H | 7.34651000  | -8.84815400  | 1.77034600 |
| H | -3.41201700 | -13.77874600 | 2.05642200 |
| H | 0.86242800  | -14.24991800 | 2.07614700 |
| H | -8.37272400 | -6.87038600  | 1.66324700 |
| H | -6.96386300 | -10.93197700 | 1.54238200 |
| H | -3.35353600 | -3.34545500  | 2.29904000 |
| H | 3.07345700  | -8.56064900  | 1.42001900 |
| H | -0.86693500 | -10.33104200 | 1.73503000 |
| H | -4.16591500 | -7.69413500  | 1.94678000 |
| C | 5.34053800  | -7.13602800  | 1.37605200 |
| C | 5.45000100  | -5.93973800  | 1.21888000 |
| C | 2.37631300  | -0.96004100  | 0.11079100 |
| C | 3.38272700  | -1.59886600  | 0.31912400 |
| C | 6.94317900  | -2.53745200  | 0.89830300 |
| C | 6.83071500  | -3.90823500  | 1.09070900 |
| C | 5.57271500  | -4.52845100  | 1.02011400 |
| C | 4.55575900  | -2.37866400  | 0.56973200 |
| C | 5.81350200  | -1.76702000  | 0.64280700 |
| H | 7.91653800  | -2.06259600  | 0.96286300 |
| C | 4.43648600  | -3.75999100  | 0.75607000 |
| H | 7.70728300  | -4.50934100  | 1.30813100 |
| H | 5.89387000  | -0.69444500  | 0.50059000 |
| H | 3.46147100  | -4.23278000  | 0.68718700 |
| C | -2.63984500 | -0.77324200  | 2.64720200 |
| C | -1.53189800 | -0.30347900  | 2.79250500 |
| C | 1.12493000  | 2.28971800   | 3.10592300 |
| C | 2.25865100  | 1.50532400   | 3.29188600 |
| C | 2.14898000  | 0.10601500   | 3.32404400 |
| C | -0.24338800 | 0.29841000   | 2.96141400 |
| C | -0.12171300 | 1.69678800   | 2.94253900 |
| H | 1.21269100  | 3.37143700   | 3.09377500 |
| C | 0.89492500  | -0.49252400  | 3.15358200 |
| H | 3.23215500  | 1.96513300   | 3.42452400 |
| H | -1.00814800 | 2.30455900   | 2.79088200 |
| H | 0.80611800  | -1.57397600  | 3.17351100 |
| C | 7.89712600  | -2.18907300  | 4.30642100 |
| C | 4.30322700  | -1.36647200  | 3.75792800 |
| C | 3.31160000  | -0.70091700  | 3.54945800 |

|       |    |             |              |             |
|-------|----|-------------|--------------|-------------|
|       | C  | 7.83346500  | -3.55584600  | 4.55502500  |
|       | C  | 6.59652200  | -4.21733800  | 4.53934800  |
|       | C  | 5.49444600  | -2.12059500  | 4.01654000  |
|       | C  | 6.73796100  | -1.46930000  | 4.04563300  |
|       | H  | 8.85554200  | -1.68134700  | 4.32282500  |
|       | C  | 5.42946300  | -3.49754600  | 4.25664700  |
|       | H  | 8.73388700  | -4.11932100  | 4.77425800  |
|       | H  | 6.78118000  | -0.40191500  | 3.85622000  |
|       | H  | 4.47190300  | -4.00726800  | 4.23360900  |
|       | C  | 6.53547500  | -5.61493500  | 4.86424500  |
|       | C  | 6.51098100  | -6.78759300  | 5.19440300  |
|       | Si | 6.48635900  | -8.52636100  | 5.83374900  |
|       | C  | 7.99448000  | -9.43160300  | 5.18138100  |
|       | C  | 4.89787100  | -9.35848100  | 5.29088600  |
|       | C  | 6.56101600  | -8.43728700  | 7.70898100  |
|       | H  | 8.91597000  | -8.94609900  | 5.51461400  |
|       | H  | 7.99848600  | -9.46789900  | 4.08945500  |
|       | H  | 7.99908700  | -10.46087400 | 5.55430600  |
|       | H  | 4.81256600  | -9.38196800  | 4.20125400  |
|       | H  | 4.02573700  | -8.83600600  | 5.69481600  |
|       | H  | 4.87507300  | -10.39038800 | 5.65634800  |
|       | H  | 5.70453800  | -7.89041800  | 8.11294800  |
|       | H  | 7.47519100  | -7.94052300  | 8.04532900  |
|       | H  | 6.54828200  | -9.44748500  | 8.13059900  |
| 15-4a | O  | -0.01652600 | -5.28091300  | -0.33279100 |
|       | C  | -0.03852500 | -2.30329100  | -0.23121600 |
|       | H  | 0.50933000  | -2.65330500  | 0.64316600  |
|       | H  | 0.44094500  | -2.69484400  | -1.13014200 |
|       | H  | -1.06602000 | -2.65148800  | -0.17151200 |
|       | N  | -0.00129700 | -0.82975300  | -0.26269200 |
|       | S  | -1.24700000 | -5.74981900  | 0.34722700  |
|       | O  | -1.82901000 | -6.97099400  | -0.26114900 |
|       | O  | -2.24666500 | -4.66601200  | 0.54511400  |
|       | C  | -0.73567500 | -6.22206400  | 1.99573800  |
|       | H  | -0.30175400 | -5.34815500  | 2.48514000  |
|       | H  | 0.00702900  | -7.01890800  | 1.92156200  |
|       | H  | -1.60766500 | -6.57037100  | 2.55178800  |
|       | C  | 1.20302500  | -0.19079900  | -0.14983300 |
|       | C  | 1.30825800  | 1.17937500   | -0.21491600 |
|       | H  | 2.29497800  | 1.60838700   | -0.11891400 |
|       | C  | 0.14910600  | 1.98159900   | -0.36296400 |
|       | N  | 0.22115300  | 3.31918200   | -0.40867600 |
|       | C  | -1.08671500 | 1.29642900   | -0.46204800 |
|       | H  | -2.02147200 | 1.82093000   | -0.59654300 |
|       | C  | -1.13360600 | -0.08098000  | -0.43138200 |
|       | C  | 1.51908800  | 3.98228800   | -0.35133800 |
|       | C  | -0.99867300 | 4.11088400   | -0.51861400 |
|       | H  | 1.36692200  | 5.05791100   | -0.39959500 |
|       | H  | 2.14841200  | 3.68057100   | -1.19475000 |



|   |             |              |             |
|---|-------------|--------------|-------------|
| H | 2.03882300  | 3.74550500   | 0.58269600  |
| H | -1.53573100 | 3.87613000   | -1.44317100 |
| H | -0.73457900 | 5.16571000   | -0.52952200 |
| H | -1.66070600 | 3.92490900   | 0.33293600  |
| C | -6.78609900 | -10.24675700 | -1.88296800 |
| C | 6.34129900  | -1.58209800  | -2.86427500 |
| C | 5.07566800  | -1.03958900  | -3.04661500 |
| C | 3.94092000  | -1.86654200  | -2.99743400 |
| C | 5.36801800  | -3.77835500  | -2.56499800 |
| C | 6.49349300  | -2.94353800  | -2.62535400 |
| H | 7.21496700  | -0.94017600  | -2.90190400 |
| C | 2.64518300  | -1.28526700  | -3.18813300 |
| C | 1.57706400  | -0.73328500  | -3.34580500 |
| C | -0.82461300 | 2.08353400   | -3.76664100 |
| C | -2.03316800 | 1.40492100   | -3.89112100 |
| C | -2.05963800 | 0.00222000   | -3.84660100 |
| C | 0.34706300  | -0.02191700  | -3.53071300 |
| C | 0.36193500  | 1.38153900   | -3.58893600 |
| H | -0.80588200 | 3.16760100   | -3.81618200 |
| C | -5.57264000 | -10.91742600 | -1.79982400 |
| C | -4.38322500 | -10.19823100 | -1.59645200 |
| C | -5.64839500 | -8.13253300  | -1.56399100 |
| C | -6.82992700 | -8.86066300  | -1.76862800 |
| H | -7.70396800 | -10.80472100 | -2.03856700 |
| C | -3.13662900 | -10.90000800 | -1.52635600 |
| C | -2.09665200 | -11.52055900 | -1.48179100 |
| C | 0.36383300  | -14.32253000 | -1.30415700 |
| C | 1.56827600  | -13.62909700 | -1.33416500 |
| C | 1.56707400  | -12.22830400 | -1.41710000 |
| C | -0.85931500 | -12.23957300 | -1.43271800 |
| C | -0.84713200 | -13.63972800 | -1.35330000 |
| H | 0.36788100  | -15.40536000 | -1.23596400 |
| C | 2.79026600  | -11.48572500 | -1.45367300 |
| C | 3.79799900  | -10.81350900 | -1.48407400 |
| C | 7.34373000  | -9.64021500  | -1.38896200 |
| C | 7.18136200  | -8.28129400  | -1.63197800 |
| C | 5.89543200  | -7.75238000  | -1.82865000 |
| C | 4.95267800  | -9.96839400  | -1.52695800 |
| C | 6.24081500  | -10.48730000 | -1.33817700 |
| H | 8.33885400  | -10.04454700 | -1.23571900 |
| C | 5.53585900  | -5.17718400  | -2.30778400 |
| C | 5.70953600  | -6.35608100  | -2.08684600 |
| C | 4.09001100  | -3.23512000  | -2.75176500 |
| C | -0.86625500 | -0.70710000  | -3.66009400 |
| C | -4.42157800 | -8.80459800  | -1.46904300 |
| C | 0.35133500  | -11.53906400 | -1.46205100 |
| C | 4.78552200  | -8.59935500  | -1.76889900 |
| H | 4.94987500  | 0.02183800   | -3.23158400 |
| H | 7.47865100  | -3.37144400  | -2.47357000 |

|    |             |              |             |
|----|-------------|--------------|-------------|
| H  | -2.95999300 | 1.94961100   | -4.03562400 |
| H  | 1.30685300  | 1.90641500   | -3.49080300 |
| H  | -5.53010000 | -11.99725400 | -1.89481100 |
| H  | -7.77455900 | -8.32906500  | -1.82696700 |
| H  | 2.51317200  | -14.16047900 | -1.29532400 |
| H  | -1.78748300 | -14.17953200 | -1.32108200 |
| H  | 8.04109000  | -7.62111900  | -1.67266200 |
| H  | 6.36661700  | -11.54717400 | -1.14450900 |
| H  | 3.21540100  | -3.87519000  | -2.69854800 |
| H  | -0.88456200 | -1.79138800  | -3.62001600 |
| H  | -3.50726400 | -8.24608600  | -1.28329200 |
| H  | 0.34632500  | -10.45552200 | -1.51404500 |
| H  | 3.78900100  | -8.19454600  | -1.90981000 |
| C  | -5.70731200 | -6.70658800  | -1.45221400 |
| C  | -5.78385400 | -5.49992400  | -1.36956400 |
| C  | -2.38028200 | -0.74831200  | -0.58789300 |
| C  | -3.46268600 | -1.27154700  | -0.73563300 |
| C  | -7.08398500 | -1.99937900  | -1.24671600 |
| C  | -7.05297000 | -3.38440000  | -1.36123400 |
| C  | -5.83519300 | -4.07438900  | -1.25273200 |
| C  | -4.69441800 | -1.96800300  | -0.93290300 |
| C  | -5.91007000 | -1.28164100  | -1.04023000 |
| H  | -8.02886800 | -1.47345100  | -1.33595100 |
| C  | -4.65398700 | -3.36344200  | -1.02767400 |
| H  | -7.96644000 | -3.94113800  | -1.54360100 |
| H  | -5.92680000 | -0.19962400  | -0.96100300 |
| H  | -3.71352600 | -3.88788200  | -0.88475000 |
| C  | -7.97002500 | -1.97148400  | -4.69267500 |
| C  | -4.33474200 | -1.30207800  | -4.18716300 |
| C  | -3.29242400 | -0.70823800  | -4.01330900 |
| C  | -7.97230300 | -3.35224000  | -4.86015800 |
| C  | -6.76840400 | -4.07043300  | -4.79999000 |
| C  | -5.56884600 | -1.99979500  | -4.39568400 |
| C  | -6.77843100 | -1.29203900  | -4.47031100 |
| H  | -8.90336700 | -1.42082900  | -4.74310200 |
| C  | -5.57000500 | -3.39029900  | -4.55491100 |
| H  | -8.89912200 | -3.88296200  | -5.05004300 |
| H  | -6.77191100 | -0.21432400  | -4.34549300 |
| H  | -4.63716600 | -3.94155000  | -4.50043500 |
| C  | -6.76111400 | -5.48510600  | -5.04644400 |
| C  | -6.77685400 | -6.67582900  | -5.30423200 |
| Si | -6.81168200 | -8.44899700  | -5.83869600 |
| C  | -8.38382700 | -9.24465200  | -5.19232300 |
| C  | -5.28281400 | -9.31286800  | -5.18652200 |
| C  | -6.81480200 | -8.46766600  | -7.71765800 |
| H  | -9.26919800 | -8.75937800  | -5.61275500 |
| H  | -8.44258500 | -9.18592200  | -4.10297400 |
| H  | -8.40833800 | -10.30169400 | -5.47663900 |
| H  | -5.22233600 | -9.24583700  | -4.09703100 |

|   |             |              |             |
|---|-------------|--------------|-------------|
| H | -4.37650400 | -8.87082000  | -5.61040800 |
| H | -5.30526300 | -10.37237600 | -5.46178800 |
| H | -5.91393900 | -7.99317900  | -8.11660700 |
| H | -7.68585600 | -7.94117400  | -8.11756900 |
| H | -6.84450100 | -9.49951900  | -8.08204400 |
| C | 6.26927500  | -10.66296000 | 2.12036000  |
| C | -6.30791400 | -0.87953500  | 2.39096000  |
| C | -5.00773600 | -0.41404900  | 2.54037500  |
| C | -3.93050000 | -1.31551600  | 2.51481400  |
| C | -5.48287500 | -3.14651700  | 2.20482800  |
| C | -6.55137600 | -2.23925400  | 2.22791700  |
| H | -7.13716400 | -0.18008700  | 2.40246400  |
| C | 5.01888800  | -11.26927600 | 2.10510900  |
| C | 3.86801700  | -10.50214600 | 1.86234200  |
| C | 5.25051500  | -8.52032100  | 1.64389900  |
| C | 6.39235400  | -9.29571600  | 1.89221100  |
| H | 7.15581600  | -11.25921500 | 2.31123400  |
| C | 2.57331300  | -11.11281600 | 1.86360200  |
| C | 1.47156600  | -11.61718600 | 1.87286900  |
| C | -1.26091400 | -14.15221300 | 2.04253300  |
| C | -2.38857600 | -13.34278500 | 1.96477500  |
| C | -2.24684500 | -11.95099300 | 1.85484600  |
| C | 0.16565900  | -12.20412500 | 1.89679500  |
| C | 0.01217000  | -13.59322200 | 2.01266100  |
| H | -1.37482000 | -15.22792100 | 2.12622500  |
| C | -3.39328700 | -11.09579100 | 1.79416500  |
| C | -4.34249600 | -10.34419500 | 1.74701000  |
| C | -7.80054700 | -8.95383000  | 1.53028600  |
| C | -7.54920800 | -7.59259900  | 1.64994500  |
| C | -6.23111900 | -7.13053900  | 1.79487700  |
| C | -5.43439000 | -9.41956000  | 1.70082100  |
| C | -6.75391800 | -9.87007800  | 1.55915500  |
| H | -8.82017600 | -9.30555300  | 1.41271500  |
| C | -5.73734600 | -4.54680600  | 2.05109600  |
| C | -5.96415000 | -5.73048600  | 1.92712400  |
| C | -4.16737900 | -2.68138900  | 2.33261700  |
| C | 3.98978200  | -9.12880400  | 1.62671100  |
| C | -0.96749100 | -11.38745100 | 1.81408100  |
| C | -5.17648000 | -8.04729000  | 1.80907900  |
| H | -4.81153200 | 0.64422400   | 2.67613300  |
| H | -7.56428200 | -2.60947200  | 2.11008200  |
| H | 4.91912600  | -12.33407400 | 2.28631400  |
| H | 7.36675500  | -8.81772400  | 1.89572200  |
| H | -3.38266300 | -13.77600600 | 1.99428600  |
| H | 0.89396700  | -14.22234400 | 2.06922100  |
| H | -8.36411600 | -6.87673600  | 1.63141500  |
| H | -6.94645400 | -10.93330000 | 1.46347500  |
| H | -3.33897300 | -3.37875900  | 2.25096500  |
| H | 3.10463300  | -8.53297000  | 1.42997600  |

|    |             |              |            |
|----|-------------|--------------|------------|
| H  | -0.85515600 | -10.31298100 | 1.71177100 |
| H  | -4.15386100 | -7.69506400  | 1.88978400 |
| C  | 5.37116200  | -7.11369300  | 1.41448700 |
| C  | 5.47519300  | -5.92195600  | 1.22362500 |
| C  | 2.36742100  | -0.98382000  | 0.05087100 |
| C  | 3.37948100  | -1.61671500  | 0.25303900 |
| C  | 6.95259500  | -2.52891900  | 0.75799000 |
| C  | 6.84726800  | -3.89373800  | 0.99301600 |
| C  | 5.58934400  | -4.51774100  | 0.98009900 |
| C  | 4.55860400  | -2.38467000  | 0.49636600 |
| C  | 5.81500400  | -1.76647200  | 0.51469300 |
| H  | 7.92713000  | -2.05218000  | 0.77759900 |
| C  | 4.44401600  | -3.75985100  | 0.72643100 |
| H  | 7.73147600  | -4.48767900  | 1.19927800 |
| H  | 5.88890600  | -0.69893400  | 0.33629100 |
| H  | 3.46844500  | -4.23531900  | 0.70306200 |
| C  | -2.59536500 | -0.81801400  | 2.66356100 |
| C  | -1.48455300 | -0.34899000  | 2.78996200 |
| C  | 1.17348500  | 2.25145600   | 3.02424000 |
| C  | 2.31246900  | 1.47127200   | 3.19824000 |
| C  | 2.20499600  | 0.07280000   | 3.25565600 |
| C  | -0.19480600 | 0.25637300   | 2.93663600 |
| C  | -0.07572600 | 1.65499300   | 2.89554100 |
| H  | 1.25886300  | 3.33310000   | 2.99611200 |
| C  | 0.94843100  | -0.53045400  | 3.11932100 |
| H  | 3.28768800  | 1.93413600   | 3.30427600 |
| H  | -0.96677000 | 2.25935400   | 2.75768900 |
| H  | 0.86122600  | -1.61143200  | 3.16211900 |
| C  | 7.95643700  | -2.26596600  | 4.16140400 |
| C  | 4.36305800  | -1.39701200  | 3.67749500 |
| C  | 3.36945900  | -0.73286900  | 3.47422900 |
| C  | 7.87415300  | -3.62396000  | 4.44930300 |
| C  | 6.62565200  | -4.26311800  | 4.48369300 |
| C  | 5.54973900  | -2.16144900  | 3.92558500 |
| C  | 6.80423300  | -1.53183900  | 3.90858300 |
| H  | 8.92419200  | -1.77623000  | 4.13955900 |
| C  | 5.46557600  | -3.52992800  | 4.20749900 |
| H  | 8.76969500  | -4.19748200  | 4.66318000 |
| H  | 6.86199600  | -0.47106800  | 3.68801100 |
| H  | 4.49842300  | -4.02148100  | 4.22324700 |
| C  | 6.54633100  | -5.64844100  | 4.85425600 |
| C  | 6.50831200  | -6.80968900  | 5.22148000 |
| Si | 6.46611500  | -8.53229700  | 5.90280000 |
| C  | 7.98183200  | -9.45720700  | 5.29556300 |
| C  | 4.87730600  | -9.36424700  | 5.36049800 |
| C  | 6.51655000  | -8.40379900  | 7.77667500 |
| H  | 8.89764500  | -8.97879200  | 5.65417000 |
| H  | 8.01936500  | -9.49892000  | 4.20461100 |
| H  | 7.96531400  | -10.48439300 | 5.67391000 |

|       |   |             |              |             |
|-------|---|-------------|--------------|-------------|
|       | H | 4.77070100  | -9.35192000  | 4.27285900  |
|       | H | 4.00964200  | -8.86197400  | 5.79807700  |
|       | H | 4.86898500  | -10.40768000 | 5.69179600  |
|       | H | 5.66084400  | -7.83881400  | 8.15667800  |
|       | H | 7.43195500  | -7.91145900  | 8.11619200  |
|       | H | 6.48523500  | -9.40510300  | 8.21837900  |
| 17-3a | O | -0.55839800 | -5.25151300  | -0.53623200 |
|       | C | -0.44715200 | -3.81601400  | -0.34616800 |
|       | H | 0.04488300  | -3.58657100  | 0.60137000  |
|       | H | 0.17417200  | -3.46679700  | -1.16783500 |
|       | H | -1.43106200 | -3.34818400  | -0.38640400 |
|       | N | -0.14113800 | -0.85716200  | -0.14333300 |
|       | S | -1.46728600 | -6.07333400  | 0.48878400  |
|       | O | -1.67230600 | -7.36889300  | -0.13653400 |
|       | O | -2.62301300 | -5.26845400  | 0.86221400  |
|       | C | -0.41204000 | -6.26640100  | 1.90151500  |
|       | H | -0.18386500 | -5.28317700  | 2.31342700  |
|       | H | 0.49257500  | -6.78407300  | 1.58350100  |
|       | H | -0.96281800 | -6.86200400  | 2.63033500  |
|       | C | 1.02386700  | -0.19552400  | -0.05969700 |
|       | C | 1.15453300  | 1.19023000   | -0.06841100 |
|       | H | 2.14492800  | 1.61915900   | 0.00175600  |
|       | C | -0.00129600 | 1.99217400   | -0.13901000 |
|       | N | 0.06724500  | 3.34997300   | -0.12544700 |
|       | C | -1.23067100 | 1.30824500   | -0.22073100 |
|       | H | -2.17336800 | 1.83387200   | -0.29395100 |
|       | C | -1.23628000 | -0.08370800  | -0.23029800 |
|       | C | 1.36266500  | 4.00503000   | -0.11161200 |
|       | C | -1.15215000 | 4.13270800   | -0.21282800 |
|       | H | 1.21547500  | 5.08354800   | -0.09881500 |
|       | H | 1.95348300  | 3.74585000   | -0.99873400 |
|       | H | 1.93876100  | 3.72601300   | 0.77801100  |
|       | H | -1.69414700 | 3.92956800   | -1.14444600 |
|       | H | -0.89859600 | 5.19107400   | -0.18620000 |
|       | H | -1.82115000 | 3.91753500   | 0.62844300  |
|       | C | 6.63670900  | -10.51272900 | 0.87704700  |
|       | C | -6.53483700 | -0.55737100  | 2.81472300  |
|       | C | -5.24016700 | -0.05647400  | 2.89257800  |
|       | C | -4.14526800 | -0.93438900  | 2.86461600  |
|       | C | -5.67160000 | -2.81223000  | 2.68185100  |
|       | C | -6.75780400 | -1.92638500  | 2.71218500  |
|       | H | -7.37802900 | 0.12510500   | 2.83158300  |
|       | C | -2.80310400 | -0.44108400  | 2.94446800  |
|       | C | -1.65878600 | -0.04955200  | 3.02308400  |
|       | C | 1.36324600  | 2.13305700   | 3.23972700  |
|       | C | 2.37461800  | 1.18321900   | 3.33568300  |
|       | C | 2.05822100  | -0.18482400  | 3.33437200  |
|       | C | -0.29522800 | 0.37678900   | 3.12409500  |
|       | C | 0.03321500  | 1.74064800   | 3.13484700  |

|   |             |              |            |
|---|-------------|--------------|------------|
| H | 1.61338400  | 3.18906400   | 3.25226600 |
| C | 3.09440300  | -1.16699200  | 3.46005400 |
| C | 3.97760300  | -1.98975100  | 3.57358100 |
| C | 7.43046800  | -3.34914500  | 3.89422900 |
| C | 7.18537100  | -4.71251800  | 3.98966800 |
| C | 5.86742300  | -5.19764500  | 3.95176800 |
| C | 5.05502200  | -2.92455100  | 3.71301300 |
| C | 6.37532100  | -2.45407200  | 3.75685100 |
| H | 8.45044700  | -2.98047200  | 3.92112500 |
| C | 5.37380500  | -11.05569700 | 1.08256500 |
| C | 4.25500400  | -10.21331900 | 1.17488400 |
| C | 5.69444600  | -8.28757100  | 0.84150800 |
| C | 6.80591000  | -9.13672200  | 0.76109900 |
| H | 7.49953900  | -11.16814300 | 0.81503200 |
| C | 2.94469800  | -10.75451500 | 1.38064600 |
| C | 1.82623400  | -11.19884800 | 1.52871800 |
| C | -0.94945300 | -13.66761000 | 1.86543400 |
| C | -2.06006700 | -12.83340600 | 1.89756800 |
| C | -1.89395400 | -11.44053700 | 1.83453500 |
| C | 0.50944200  | -11.74388800 | 1.67359900 |
| C | 0.33136900  | -13.13296200 | 1.76236600 |
| H | -1.08199100 | -14.74353400 | 1.91847200 |
| C | -3.03385700 | -10.57967200 | 1.92572300 |
| C | -4.00230100 | -9.86014200  | 2.03951200 |
| C | -7.56102800 | -8.82927200  | 2.44883600 |
| C | -7.44033600 | -7.44662000  | 2.52150500 |
| C | -6.17464900 | -6.84707200  | 2.42880900 |
| C | -5.16472900 | -9.03817700  | 2.19174000 |
| C | -6.43375800 | -9.62792500  | 2.28870300 |
| H | -8.54156000 | -9.28891700  | 2.51742300 |
| C | -5.87945800 | -4.22489300  | 2.57965800 |
| C | -6.03015100 | -5.42501500  | 2.50779100 |
| C | -4.36679200 | -2.31068300  | 2.75099600 |
| C | 0.72148200  | -0.58105700  | 3.22273500 |
| C | 4.80477200  | -4.30005000  | 3.80951500 |
| C | 4.42154300  | -8.83159400  | 1.04901000 |
| C | -0.60901900 | -10.90107200 | 1.70945500 |
| C | -5.04041500 | -7.64589000  | 2.25344200 |
| H | -5.06504600 | 1.01083100   | 2.97617700 |
| H | -7.76666900 | -2.31917900  | 2.64421900 |
| H | 3.41207000  | 1.48888200   | 3.41994300 |
| H | -0.75684500 | 2.47997700   | 3.05047300 |
| H | 8.00420300  | -5.41604000  | 4.09555400 |
| H | 6.56145300  | -1.38878000  | 3.67222600 |
| H | 5.24268400  | -12.12782600 | 1.18553400 |
| H | 7.79086900  | -8.71178900  | 0.59895300 |
| H | -3.05927200 | -13.24593600 | 1.98704400 |
| H | 1.20147600  | -13.78099600 | 1.73358000 |
| H | -8.31729200 | -6.82105000  | 2.65028900 |

|    |             |              |             |
|----|-------------|--------------|-------------|
| H  | -6.52459500 | -10.70715900 | 2.22793800  |
| H  | -3.52467300 | -2.99332300  | 2.69974800  |
| H  | 0.46997100  | -1.63637400  | 3.21073600  |
| H  | 3.78504700  | -4.66806800  | 3.77012200  |
| H  | 3.56024400  | -8.17466300  | 1.11361900  |
| H  | -0.48078800 | -9.82637000  | 1.63299900  |
| H  | -4.06569500 | -7.17895700  | 2.15529500  |
| C  | 6.64822500  | -11.36423500 | 4.30824300  |
| C  | 5.53775300  | -7.81286200  | 4.16160500  |
| C  | 5.64525600  | -6.60955700  | 4.05915400  |
| C  | 5.45192000  | -12.02340700 | 4.56286700  |
| C  | 4.25962300  | -11.29322500 | 4.68512300  |
| C  | 5.48693900  | -9.23952100  | 4.28874100  |
| C  | 6.67291500  | -9.98095300  | 4.17492700  |
| H  | 7.56823400  | -11.93129300 | 4.21235200  |
| C  | 4.27991700  | -9.90192800  | 4.53955800  |
| H  | 5.42805500  | -13.10194300 | 4.67651900  |
| H  | 7.60415000  | -9.46237800  | 3.97311100  |
| H  | 3.35813600  | -9.33626100  | 4.62487200  |
| C  | 3.03439800  | -11.97234200 | 4.99545000  |
| C  | 2.01251000  | -12.56255600 | 5.29695000  |
| Si | 0.46853000  | -13.42703600 | 5.83818200  |
| C  | 0.40967500  | -15.12247900 | 5.03505800  |
| C  | -0.98723500 | -12.35371200 | 5.34354400  |
| C  | 0.53442500  | -13.61770700 | 7.70643000  |
| H  | 1.23960000  | -15.74351000 | 5.38438900  |
| H  | 0.46621100  | -15.05472800 | 3.94599900  |
| H  | -0.52556900 | -15.62727900 | 5.29731200  |
| H  | -0.92200800 | -12.07031300 | 4.28955100  |
| H  | -1.00871700 | -11.43944500 | 5.94462700  |
| H  | -1.93136100 | -12.88579200 | 5.49734900  |
| H  | 0.61086200  | -12.64435400 | 8.19939700  |
| H  | 1.39046000  | -14.22588800 | 8.01208500  |
| H  | -0.37616100 | -14.10884500 | 8.06426800  |
| C  | 5.82893800  | -6.86812900  | 0.72103300  |
| C  | 5.88030200  | -5.66086300  | 0.62734300  |
| C  | 2.22754000  | -0.97589600  | 0.05035900  |
| C  | 3.29167900  | -1.54482100  | 0.15527400  |
| C  | 6.96964700  | -2.09180400  | 0.40217300  |
| C  | 7.03452600  | -3.47722100  | 0.50932000  |
| C  | 5.85530000  | -4.23495600  | 0.51354600  |
| C  | 4.55746700  | -2.19983700  | 0.28128700  |
| C  | 5.74239100  | -1.44901600  | 0.29199400  |
| H  | 7.88464200  | -1.50830000  | 0.40295400  |
| C  | 4.61915600  | -3.59043800  | 0.39565200  |
| H  | 7.99147500  | -3.97980700  | 0.60278700  |
| H  | 5.68820800  | -0.36937000  | 0.19906600  |
| H  | 3.70482200  | -4.17510400  | 0.39088600  |
| C  | -7.05487700 | -10.19648500 | -1.09598700 |

|   |             |              |             |
|---|-------------|--------------|-------------|
| C | 6.33336700  | -0.96315600  | -3.07441900 |
| C | 5.05768000  | -0.41814000  | -3.16551800 |
| C | 3.93259400  | -1.25722600  | -3.14076700 |
| C | 5.39067400  | -3.18581300  | -2.92628600 |
| C | 6.50699100  | -2.33772800  | -2.95543500 |
| H | 7.20024700  | -0.31115400  | -3.09048100 |
| C | 2.61018400  | -0.71616000  | -3.23823000 |
| C | 1.48084200  | -0.28343000  | -3.31788900 |
| C | -1.42647000 | 2.04303400   | -3.58390000 |
| C | -2.48419000 | 1.14468600   | -3.66760500 |
| C | -2.23843200 | -0.23740300  | -3.63361300 |
| C | 0.13919300  | 0.20645800   | -3.42406500 |
| C | -0.11885600 | 1.58480100   | -3.46171100 |
| H | -1.62235300 | 3.10989500   | -3.61839800 |
| C | -5.80283700 | -10.78293500 | -1.22848000 |
| C | -4.65010600 | -9.98096000  | -1.23902400 |
| C | -6.03314100 | -8.00756000  | -0.98751800 |
| C | -7.17753900 | -8.81566900  | -0.97870000 |
| H | -7.94407700 | -10.81877000 | -1.09531800 |
| C | -3.35880800 | -10.58522900 | -1.37466400 |
| C | -2.27149300 | -11.11286600 | -1.47017000 |
| C | 0.33056800  | -13.78256600 | -1.58627400 |
| C | 1.49141000  | -13.03146100 | -1.72197500 |
| C | 1.41790200  | -11.63051300 | -1.78385900 |
| C | -0.99572500 | -11.75604400 | -1.56299900 |
| C | -0.90950600 | -13.15547000 | -1.50891200 |
| H | 0.39040800  | -14.86515800 | -1.53673300 |
| C | 2.60914300  | -10.85581800 | -1.95550900 |
| C | 3.61230200  | -10.19696800 | -2.12184400 |
| C | 7.17721400  | -9.22844900  | -2.65060700 |
| C | 7.07247100  | -7.84483500  | -2.73125200 |
| C | 5.81699200  | -7.22756700  | -2.61546100 |
| C | 4.78779700  | -9.40520400  | -2.32388000 |
| C | 6.04542800  | -10.01210300 | -2.45126800 |
| H | 8.14976000  | -9.70052200  | -2.74225700 |
| C | 5.55728700  | -4.60341800  | -2.80752600 |
| C | 5.68848200  | -5.80471600  | -2.71488700 |
| C | 4.10533100  | -2.63972200  | -3.01780300 |
| C | -0.92482700 | -0.69996700  | -3.50638500 |
| C | -4.76740200 | -8.59391200  | -1.11399200 |
| C | 0.17374100  | -10.99678000 | -1.69534600 |
| C | 4.67939600  | -8.01246300  | -2.40616700 |
| H | 4.92001800  | 0.65387100   | -3.25855000 |
| H | 7.50088700  | -2.76447700  | -2.87364000 |
| H | -3.50412200 | 1.50096700   | -3.76514600 |
| H | 0.70821000  | 2.28390000   | -3.39039600 |
| H | -5.70386000 | -11.85789500 | -1.33906200 |
| H | -8.15422000 | -8.35414800  | -0.87615400 |
| H | 2.45976600  | -13.51578300 | -1.78816200 |



|    |             |              |             |
|----|-------------|--------------|-------------|
| H  | -1.81846200 | -13.73703800 | -1.39261300 |
| H  | 7.95386300  | -7.23266300  | -2.89008900 |
| H  | 6.12517200  | -11.09162300 | -2.38118600 |
| H  | 3.23779300  | -3.29043900  | -2.98649100 |
| H  | -0.72889400 | -1.76633000  | -3.47150000 |
| H  | -3.87615600 | -7.97326900  | -1.10168800 |
| H  | 0.11246200  | -9.91404500  | -1.72972700 |
| H  | 3.70803200  | -7.54046200  | -2.30437300 |
| C  | -6.13895600 | -6.58461200  | -0.88200500 |
| C  | -6.19876200 | -5.37623900  | -0.80890100 |
| C  | -2.50288500 | -0.75644900  | -0.33894400 |
| C  | -3.59290300 | -1.27691400  | -0.43182000 |
| C  | -7.27852300 | -1.79718200  | -0.68420100 |
| C  | -7.34979500 | -3.18488900  | -0.75528900 |
| C  | -6.17427400 | -3.94788100  | -0.72875000 |
| C  | -4.86902000 | -1.91409000  | -0.54425600 |
| C  | -6.04853300 | -1.15672700  | -0.58521600 |
| H  | -8.19070100 | -1.20960600  | -0.70818600 |
| C  | -4.93601100 | -3.30774500  | -0.61471800 |
| H  | -8.30890100 | -3.68439300  | -0.84402300 |
| H  | -5.99042200 | -0.07496000  | -0.52468300 |
| H  | -4.02915200 | -3.90259800  | -0.56636600 |
| C  | -3.32464700 | -1.16612200  | -3.73814600 |
| C  | -4.25176600 | -1.94114000  | -3.83459600 |
| C  | -7.78474600 | -3.06962600  | -4.15729400 |
| C  | -7.63386200 | -4.44894900  | -4.21739100 |
| C  | -6.35336300 | -5.02294000  | -4.15139300 |
| C  | -5.38759200 | -2.80651100  | -3.95770700 |
| C  | -6.67175200 | -2.24658800  | -4.02966600 |
| H  | -8.77655300 | -2.63245800  | -4.20682400 |
| C  | -5.23249300 | -4.19731400  | -4.01615300 |
| H  | -8.49903400 | -5.09566800  | -4.31790400 |
| H  | -6.78419800 | -1.16909900  | -3.97449800 |
| H  | -4.24166000 | -4.63433900  | -3.95226100 |
| C  | -7.46284800 | -11.14451600 | -4.50173900 |
| C  | -6.17248500 | -7.65689200  | -4.30604800 |
| C  | -6.22123700 | -6.44797300  | -4.22846500 |
| C  | -6.28782700 | -11.87096000 | -4.65569900 |
| C  | -5.05082600 | -11.20926700 | -4.69117300 |
| C  | -6.18982400 | -9.08619500  | -4.40981100 |
| C  | -7.42071300 | -9.76074200  | -4.38394300 |
| H  | -8.41722100 | -11.65988600 | -4.47640700 |
| C  | -5.00545200 | -9.81655000  | -4.55858900 |
| H  | -6.31530300 | -12.95043000 | -4.75941000 |
| H  | -8.33514300 | -9.18894500  | -4.26524100 |
| H  | -4.05033200 | -9.30209600  | -4.57698200 |
| C  | -3.84815000 | -11.96278500 | -4.90748700 |
| C  | -2.85307300 | -12.62893800 | -5.13177200 |
| Si | -1.37931400 | -13.65826900 | -5.57239700 |

|         |   |             |              |             |
|---------|---|-------------|--------------|-------------|
|         | C | -1.46517400 | -15.27187300 | -4.61709200 |
|         | C | 0.17033800  | -12.68992900 | -5.15760000 |
|         | C | -1.45524500 | -14.01119900 | -7.41601600 |
|         | H | -2.36503500 | -15.83423700 | -4.88154800 |
|         | H | -1.47121600 | -15.09840100 | -3.53838800 |
|         | H | -0.59495500 | -15.89151900 | -4.85658100 |
|         | H | 0.16815500  | -12.37942000 | -4.10956200 |
|         | H | 0.24679800  | -11.79511000 | -5.78223300 |
|         | H | 1.05994300  | -13.30412300 | -5.33030300 |
|         | H | -1.44109200 | -13.08514200 | -7.99706900 |
|         | H | -2.36104200 | -14.56584200 | -7.67589900 |
|         | H | -0.59116100 | -14.61315600 | -7.71511900 |
| 17-TS-a | O | -0.19680800 | -4.69455700  | -0.39963000 |
|         | C | -0.19560000 | -2.83829800  | -0.23211300 |
|         | H | 0.41353400  | -2.85098400  | 0.66077600  |
|         | H | 0.29601000  | -2.76778800  | -1.19160500 |
|         | H | -1.27025100 | -2.79152200  | -0.15562400 |
|         | N | -0.15499000 | -0.79840900  | -0.14338400 |
|         | S | -1.12099600 | -5.49428200  | 0.51744700  |
|         | O | -1.48318600 | -6.76988100  | -0.11150700 |
|         | O | -2.24438900 | -4.66608800  | 0.98825300  |
|         | C | -0.11834300 | -5.86874700  | 1.93991200  |
|         | H | 0.19378100  | -4.93241900  | 2.40475900  |
|         | H | 0.74927200  | -6.44146100  | 1.61226300  |
|         | H | -0.72086500 | -6.45360300  | 2.63535100  |
|         | C | 1.02381000  | -0.15443900  | -0.06297100 |
|         | C | 1.14318900  | 1.22758800   | -0.06671000 |
|         | H | 2.13290800  | 1.65731700   | 0.00058100  |
|         | C | -0.01858700 | 2.02783000   | -0.12600700 |
|         | N | 0.04786200  | 3.37886300   | -0.11121600 |
|         | C | -1.25200600 | 1.34387300   | -0.19809900 |
|         | H | -2.19494500 | 1.86968300   | -0.25858900 |
|         | C | -1.26815400 | -0.04370900  | -0.21780700 |
|         | C | 1.34329800  | 4.03896200   | -0.09032600 |
|         | C | -1.17493700 | 4.16310200   | -0.17438600 |
|         | H | 1.19149000  | 5.11635500   | -0.07709700 |
|         | H | 1.93467300  | 3.78169100   | -0.97655000 |
|         | H | 1.91462900  | 3.75971900   | 0.80170600  |
|         | H | -1.72900600 | 3.96164600   | -1.09830200 |
|         | H | -0.91998100 | 5.22068000   | -0.14900200 |
|         | H | -1.82733500 | 3.94377500   | 0.67797400  |
|         | C | 6.60950900  | -10.52352900 | 0.91666200  |
|         | C | -6.48732200 | -0.69100700  | 2.90271700  |
|         | C | -5.19337600 | -0.18771700  | 2.96987900  |
|         | C | -4.09617600 | -1.06045000  | 2.89651800  |
|         | C | -5.61617300 | -2.93785400  | 2.69619000  |
|         | C | -6.70536700 | -2.05817600  | 2.77041500  |
|         | H | -7.33275100 | -0.01305100  | 2.95351900  |
|         | C | -2.75790000 | -0.55640200  | 2.97214300  |

|   |             |              |            |
|---|-------------|--------------|------------|
| C | -1.61990200 | -0.14573500  | 3.04268600 |
| C | 1.36034700  | 2.09537900   | 3.24261000 |
| C | 2.39108900  | 1.16501600   | 3.32476000 |
| C | 2.10042900  | -0.20860900  | 3.32168400 |
| C | -0.26493300 | 0.30760800   | 3.13306300 |
| C | 0.03710700  | 1.67783800   | 3.14699300 |
| H | 1.58996800  | 3.15597700   | 3.25974500 |
| C | 3.15154900  | -1.17507300  | 3.43618600 |
| C | 4.03933500  | -1.99345400  | 3.54321700 |
| C | 7.48900900  | -3.37265800  | 3.81646400 |
| C | 7.23468400  | -4.73320700  | 3.92894700 |
| C | 5.91259800  | -5.20828900  | 3.92018900 |
| C | 5.11475900  | -2.93126300  | 3.67332200 |
| C | 6.43881600  | -2.47006800  | 3.69023700 |
| H | 8.51229000  | -3.01235700  | 3.82203400 |
| C | 5.35406900  | -11.08225100 | 1.12534500 |
| C | 4.22312100  | -10.25509700 | 1.20504900 |
| C | 5.63488100  | -8.31303200  | 0.85237400 |
| C | 6.75886800  | -9.14678700  | 0.78448000 |
| H | 7.48202100  | -11.16685500 | 0.86457700 |
| C | 2.92048300  | -10.81423000 | 1.41103200 |
| C | 1.80774900  | -11.27331600 | 1.55721500 |
| C | -0.93321200 | -13.77957100 | 1.90506500 |
| C | -2.05665000 | -12.96180700 | 1.91837800 |
| C | -1.91069200 | -11.56783200 | 1.83821900 |
| C | 0.49829200  | -11.83647600 | 1.69938700 |
| C | 0.34005600  | -13.22707000 | 1.80383000 |
| H | -1.04956300 | -14.85659900 | 1.97190300 |
| C | -3.06147600 | -10.71991300 | 1.91074300 |
| C | -4.03851000 | -10.00932500 | 2.00302100 |
| C | -7.59127600 | -8.91175700  | 2.28198900 |
| C | -7.44337100 | -7.53429000  | 2.38901400 |
| C | -6.16189600 | -6.96176900  | 2.36568100 |
| C | -5.19208700 | -9.17089400  | 2.12658600 |
| C | -6.47606500 | -9.73304100  | 2.15328500 |
| H | -8.58394600 | -9.34959000  | 2.29538300 |
| C | -5.82835100 | -4.34806200  | 2.57117100 |
| C | -5.99190700 | -5.54478600  | 2.47489700 |
| C | -4.31078700 | -2.43468200  | 2.74891000 |
| C | 0.77067100  | -0.63046400  | 3.22090400 |
| C | 4.85498400  | -4.30355700  | 3.78712200 |
| C | 4.36944000  | -8.87248200  | 1.06337700 |
| C | -0.63278300 | -11.01022200 | 1.71699300 |
| C | -5.03965700 | -7.78336400  | 2.22682800 |
| H | -5.01973200 | 0.87739000   | 3.08038700 |
| H | -7.71362200 | -2.45461300  | 2.71478000 |
| H | 3.42304100  | 1.49035500   | 3.40136800 |
| H | -0.76811800 | 2.40200300   | 3.07510600 |
| H | 8.04997500  | -5.44191500  | 4.02754500 |

|    |             |              |            |
|----|-------------|--------------|------------|
| H  | 6.63160200  | -1.40699600  | 3.59346200 |
| H  | 5.23802400  | -12.15489700 | 1.24023500 |
| H  | 7.73797100  | -8.70951600  | 0.61980800 |
| H  | -3.05001300 | -13.38833800 | 2.00730000 |
| H  | 1.21957200  | -13.86269200 | 1.79005800 |
| H  | -8.31109700 | -6.89095600  | 2.48888200 |
| H  | -6.58845500 | -10.80817600 | 2.06336600 |
| H  | -3.46799300 | -3.11180000  | 2.64862700 |
| H  | 0.53874300  | -1.69057300  | 3.21728800 |
| H  | 3.83172000  | -4.66349900  | 3.76818000 |
| H  | 3.49806700  | -8.22801900  | 1.11696300 |
| H  | -0.52011900 | -9.93423600  | 1.63096200 |
| H  | -4.04879800 | -7.34231800  | 2.18495300 |
| C  | 6.61177900  | -11.38176500 | 4.36021800 |
| C  | 5.55444100  | -7.81662500  | 4.16442900 |
| C  | 5.67831400  | -6.61634900  | 4.04702400 |
| C  | 5.40508400  | -12.01906800 | 4.62110100 |
| C  | 4.22347700  | -11.26966600 | 4.73086700 |
| C  | 5.48240400  | -9.24059100  | 4.30880500 |
| C  | 6.65759400  | -10.00097400 | 4.20865000 |
| H  | 7.52334600  | -11.96397700 | 4.27541300 |
| C  | 4.26475600  | -9.88119400  | 4.56502900 |
| H  | 5.36489900  | -13.09534000 | 4.75045400 |
| H  | 7.59711700  | -9.49885500  | 4.00370500 |
| H  | 3.35158400  | -9.30030300  | 4.63980700 |
| C  | 2.98971000  | -11.92743900 | 5.05322400 |
| C  | 1.96341600  | -12.50088400 | 5.37160100 |
| Si | 0.41263700  | -13.33803600 | 5.93597200 |
| C  | 0.36662000  | -15.07065100 | 5.21684800 |
| C  | -1.03940100 | -12.29988000 | 5.36524000 |
| C  | 0.45510500  | -13.43063900 | 7.81184900 |
| H  | 1.19904000  | -15.66989500 | 5.59674800 |
| H  | 0.42612300  | -15.05184700 | 4.12608400 |
| H  | -0.56680100 | -15.56792200 | 5.49919400 |
| H  | -0.96951100 | -12.09027400 | 4.29475500 |
| H  | -1.06327500 | -11.34673600 | 5.90164000 |
| H  | -1.98419300 | -12.82035600 | 5.55121000 |
| H  | 0.52024600  | -12.43246800 | 8.25362500 |
| H  | 1.31035300  | -14.01670900 | 8.15959400 |
| H  | -0.45748600 | -13.90751300 | 8.18342900 |
| C  | 5.75275800  | -6.89360400  | 0.71494600 |
| C  | 5.79840500  | -5.68747700  | 0.60629400 |
| C  | 2.21930700  | -0.94253300  | 0.03618500 |
| C  | 3.27621900  | -1.52596500  | 0.13270800 |
| C  | 6.94379700  | -2.14176400  | 0.32749600 |
| C  | 6.98183300  | -3.52698900  | 0.44609700 |
| C  | 5.78870900  | -4.26289400  | 0.47655400 |
| C  | 4.53030400  | -2.20524200  | 0.24548500 |
| C  | 5.72787400  | -1.47570500  | 0.23135700 |

|   |             |              |             |
|---|-------------|--------------|-------------|
| H | 7.87012300  | -1.57687000  | 0.30895400  |
| C | 4.56321300  | -3.59632900  | 0.37131900  |
| H | 7.93003700  | -4.04771500  | 0.52896900  |
| H | 5.69249400  | -0.39609200  | 0.13072300  |
| H | 3.63640400  | -4.16145600  | 0.38423800  |
| C | -7.02347000 | -10.20491100 | -1.25559900 |
| C | 6.23820700  | -1.03571600  | -3.14021300 |
| C | 4.95691400  | -0.50242100  | -3.21568100 |
| C | 3.83963600  | -1.35132500  | -3.16772600 |
| C | 5.31623000  | -3.26531700  | -2.96053100 |
| C | 6.42455600  | -2.40797600  | -3.01329600 |
| H | 7.09927300  | -0.37673800  | -3.17419400 |
| C | 2.51450600  | -0.81487200  | -3.25055400 |
| C | 1.39088000  | -0.36614700  | -3.32293600 |
| C | -1.45680400 | 2.03486500   | -3.55582000 |
| C | -2.53871200 | 1.16504500   | -3.63839300 |
| C | -2.32819800 | -0.22284400  | -3.61698800 |
| C | 0.06136500  | 0.15687700   | -3.42007100 |
| C | -0.16062700 | 1.54204100   | -3.44592800 |
| H | -1.62480800 | 3.10668000   | -3.58224200 |
| C | -5.77646900 | -10.80798200 | -1.35218300 |
| C | -4.61220100 | -10.02455800 | -1.29968900 |
| C | -5.97360000 | -8.03485300  | -1.05744600 |
| C | -7.12918300 | -8.82529500  | -1.11191300 |
| H | -7.92138100 | -10.81254700 | -1.30270500 |
| C | -3.32740000 | -10.64747500 | -1.40240700 |
| C | -2.24624100 | -11.19104800 | -1.47109400 |
| C | 0.34556100  | -13.87288300 | -1.55918800 |
| C | 1.50952900  | -13.12616100 | -1.69416600 |
| C | 1.44067400  | -11.72521900 | -1.75788600 |
| C | -0.97386800 | -11.84241800 | -1.54626700 |
| C | -0.89286900 | -13.24180300 | -1.48647400 |
| H | 0.40138600  | -14.95555300 | -1.50767600 |
| C | 2.63111400  | -10.94969100 | -1.92894300 |
| C | 3.63290800  | -10.28955400 | -2.09767400 |
| C | 7.18581500  | -9.28084500  | -2.63477800 |
| C | 7.06283700  | -7.89939800  | -2.72733000 |
| C | 5.79919900  | -7.29788300  | -2.61756000 |
| C | 4.79889900  | -9.48611500  | -2.30697000 |
| C | 6.06432600  | -10.07753700 | -2.42916100 |
| H | 8.16447400  | -9.74086400  | -2.72238000 |
| C | 5.49977700  | -4.67985600  | -2.83259100 |
| C | 5.65024400  | -5.87794000  | -2.72910400 |
| C | 4.02453500  | -2.73122200  | -3.03658200 |
| C | -1.02606800 | -0.72066600  | -3.50278900 |
| C | -4.71318300 | -8.63876800  | -1.14840400 |
| C | 0.19849500  | -11.08746400 | -1.67470700 |
| C | 4.67206100  | -8.09577800  | -2.40128600 |
| H | 4.80805100  | 0.56751600   | -3.31481000 |

|   |             |              |             |
|---|-------------|--------------|-------------|
| H | 7.42306500  | -2.82603600  | -2.94323900 |
| H | -3.54944000 | 1.54867000   | -3.72666300 |
| H | 0.68500500  | 2.21885600   | -3.37696200 |
| H | -5.68897000 | -11.88178000 | -1.48138900 |
| H | -8.10191300 | -8.35008900  | -1.03770200 |
| H | 2.47617200  | -13.61424800 | -1.75769800 |
| H | -1.80368900 | -13.82057400 | -1.37107800 |
| H | 7.93603800  | -7.27691800  | -2.89127700 |
| H | 6.15821800  | -11.15532400 | -2.35005900 |
| H | 3.16328600  | -3.38933100  | -2.98763300 |
| H | -0.85876700 | -1.79246500  | -3.48471900 |
| H | -3.81545200 | -8.03081500  | -1.08627800 |
| H | 0.14140900  | -10.00474300 | -1.71426700 |
| H | 3.69471400  | -7.63562000  | -2.30241800 |
| C | -6.06865600 | -6.61314300  | -0.92636200 |
| C | -6.12764700 | -5.40670500  | -0.82702800 |
| C | -2.52967400 | -0.71967000  | -0.31755800 |
| C | -3.61489300 | -1.25099900  | -0.40216000 |
| C | -7.28758500 | -1.85936400  | -0.61372200 |
| C | -7.32161400 | -3.24663400  | -0.71133900 |
| C | -6.12675200 | -3.98027600  | -0.71440800 |
| C | -4.87654700 | -1.91708200  | -0.50826600 |
| C | -6.07370700 | -1.18812100  | -0.52051900 |
| H | -8.21532200 | -1.29640700  | -0.61468300 |
| C | -4.90356300 | -3.31156400  | -0.60080800 |
| H | -8.26831900 | -3.76969100  | -0.79786100 |
| H | -6.04228900 | -0.10650700  | -0.44167400 |
| H | -3.97634300 | -3.87545600  | -0.56058200 |
| C | -3.43175500 | -1.13012700  | -3.72019400 |
| C | -4.35950800 | -1.90427300  | -3.81530900 |
| C | -7.88338100 | -3.07668700  | -4.08374500 |
| C | -7.71273900 | -4.45216300  | -4.17348300 |
| C | -6.42254600 | -5.00756200  | -4.14962700 |
| C | -5.48730200 | -2.78020700  | -3.93370400 |
| C | -6.78052200 | -2.23866200  | -3.96588900 |
| H | -8.88274500 | -2.65471800  | -4.10122700 |
| C | -5.31184400 | -4.16696600  | -4.02433900 |
| H | -8.57016500 | -5.11035100  | -4.26553700 |
| H | -6.90808300 | -1.16433000  | -3.88710100 |
| H | -4.31315500 | -4.58906500  | -3.99166600 |
| C | -7.48035500 | -11.11893000 | -4.67336600 |
| C | -6.20677100 | -7.63508600  | -4.36001500 |
| C | -6.27037800 | -6.42873500  | -4.25678600 |
| C | -6.29908400 | -11.84084200 | -4.79942600 |
| C | -5.06281000 | -11.17773200 | -4.77905100 |
| C | -6.21423400 | -9.06181800  | -4.49617600 |
| C | -7.44440600 | -9.73791500  | -4.52815700 |
| H | -8.43403000 | -11.63563500 | -4.69288400 |
| C | -5.02384400 | -9.78758700  | -4.61671700 |

|       |    |             |              |             |
|-------|----|-------------|--------------|-------------|
|       | H  | -6.32086500 | -12.91810700 | -4.92482400 |
|       | H  | -8.36321400 | -9.16889000  | -4.43224200 |
|       | H  | -4.06954400 | -9.27218300  | -4.58916500 |
|       | C  | -3.85478300 | -11.93033900 | -4.96894200 |
|       | C  | -2.85764600 | -12.59879600 | -5.17720000 |
|       | Si | -1.38051000 | -13.63180800 | -5.59951700 |
|       | C  | -1.49312300 | -15.25388100 | -4.66183300 |
|       | C  | 0.16985900  | -12.68371100 | -5.14378700 |
|       | C  | -1.42466600 | -13.96358000 | -7.44810300 |
|       | H  | -2.39459500 | -15.80612000 | -4.94155600 |
|       | H  | -1.50942900 | -15.08950400 | -3.58169900 |
|       | H  | -0.62530400 | -15.87866800 | -4.89678800 |
|       | H  | 0.16163000  | -12.40484200 | -4.08694800 |
|       | H  | 0.25807700  | -11.77135500 | -5.74072600 |
|       | H  | 1.05641500  | -13.29916700 | -5.32748600 |
|       | H  | -1.39270100 | -13.03115500 | -8.01819600 |
|       | H  | -2.32988400 | -14.50799700 | -7.73067900 |
|       | H  | -0.55991100 | -14.56894300 | -7.73815800 |
| 17-4a | O  | -0.31041200 | -5.24655100  | 0.05193300  |
|       | C  | -0.17956200 | -2.27939100  | -0.03282300 |
|       | H  | 0.57292100  | -2.61565500  | 0.67871100  |
|       | H  | 0.03790700  | -2.71161200  | -1.01199900 |
|       | H  | -1.16384300 | -2.60267400  | 0.30325200  |
|       | N  | -0.13180300 | -0.80860800  | -0.11472400 |
|       | S  | -1.47742500 | -5.58517800  | 0.90036100  |
|       | O  | -2.16071900 | -6.83679700  | 0.49127500  |
|       | O  | -2.41155900 | -4.44327600  | 1.07791100  |
|       | C  | -0.81716100 | -5.90873700  | 2.53188900  |
|       | H  | -0.32003200 | -5.00580700  | 2.88991100  |
|       | H  | -0.10270700 | -6.73020400  | 2.46745200  |
|       | H  | -1.63898700 | -6.17473400  | 3.19785900  |
|       | C  | 1.07151500  | -0.16053900  | -0.07205100 |
|       | C  | 1.15908900  | 1.21065100   | -0.15500400 |
|       | H  | 2.14626600  | 1.64751100   | -0.11688600 |
|       | C  | -0.01122700 | 2.00225000   | -0.26202700 |
|       | N  | 0.04652700  | 3.34061300   | -0.31347900 |
|       | C  | -1.24253200 | 1.30504500   | -0.31841800 |
|       | H  | -2.18583000 | 1.81936600   | -0.43113600 |
|       | C  | -1.27514300 | -0.07170700  | -0.26087800 |
|       | C  | 1.33825800  | 4.01668700   | -0.27820500 |
|       | C  | -1.18297400 | 4.11994400   | -0.40006900 |
|       | H  | 1.17378900  | 5.09114800   | -0.30607400 |
|       | H  | 1.95127900  | 3.73453700   | -1.14011800 |
|       | H  | 1.88172100  | 3.77130000   | 0.63968900  |
|       | H  | -1.73887200 | 3.87291500   | -1.30997000 |
|       | H  | -0.92938600 | 5.17705600   | -0.42541300 |
|       | H  | -1.82301500 | 3.93444400   | 0.46835100  |
|       | C  | 6.61302700  | -10.49463700 | 0.88210700  |
|       | C  | -6.52128600 | -0.61742800  | 2.75427700  |

|   |             |              |            |
|---|-------------|--------------|------------|
| C | -5.22123900 | -0.13280000  | 2.83519900 |
| C | -4.13847700 | -1.02628700  | 2.80879900 |
| C | -5.68362200 | -2.88388000  | 2.63291400 |
| C | -6.75886100 | -1.98504200  | 2.65792000 |
| H | -7.35668400 | 0.07467800   | 2.76732600 |
| C | -2.79309800 | -0.54231100  | 2.89332800 |
| C | -1.65165800 | -0.14403100  | 2.98070800 |
| C | 1.35320200  | 2.06736700   | 3.14113800 |
| C | 2.37178300  | 1.12864400   | 3.26734600 |
| C | 2.06425700  | -0.24070800  | 3.31310600 |
| C | -0.29312400 | 0.29609800   | 3.08203300 |
| C | 0.02555200  | 1.66253400   | 3.04681100 |
| H | 1.59563500  | 3.12510500   | 3.12223000 |
| C | 3.10542400  | -1.21305200  | 3.45953000 |
| C | 3.98980000  | -2.03257200  | 3.58417200 |
| C | 7.44441700  | -3.37281200  | 3.94489400 |
| C | 7.20517400  | -4.73845200  | 4.02500900 |
| C | 5.89080800  | -5.23153800  | 3.96645900 |
| C | 5.06986300  | -2.96195700  | 3.73433100 |
| C | 6.38603600  | -2.48267800  | 3.80167100 |
| H | 8.46184600  | -2.99893100  | 3.98947000 |
| C | 5.35078100  | -11.04016100 | 1.08345100 |
| C | 4.22914900  | -10.19997000 | 1.16606000 |
| C | 5.66550100  | -8.27234600  | 0.83742900 |
| C | 6.77927200  | -9.11836600  | 0.76213400 |
| H | 7.47810500  | -11.14770200 | 0.82721400 |
| C | 2.91900800  | -10.74340500 | 1.36627500 |
| C | 1.79878200  | -11.18810400 | 1.49854000 |
| C | -0.93699800 | -13.69923600 | 1.84004000 |
| C | -2.05999400 | -12.88249100 | 1.88931000 |
| C | -1.91594500 | -11.48690200 | 1.83050000 |
| C | 0.49027100  | -11.75204000 | 1.64596900 |
| C | 0.33427800  | -13.14444300 | 1.72578300 |
| H | -1.05243600 | -14.77732200 | 1.88908400 |
| C | -3.06625900 | -10.64078400 | 1.92813600 |
| C | -4.05297100 | -9.94546400  | 2.03417600 |
| C | -7.60486200 | -8.89078500  | 2.45665600 |
| C | -7.47222500 | -7.50855100  | 2.51336500 |
| C | -6.20319500 | -6.91879400  | 2.40032700 |
| C | -5.21306100 | -9.11918500  | 2.18168600 |
| C | -6.48431400 | -9.69954800  | 2.29902700 |
| H | -8.58827700 | -9.34197400  | 2.53889800 |
| C | -5.90777800 | -4.29570600  | 2.54588300 |
| C | -6.05109200 | -5.49689000  | 2.47368400 |
| C | -4.37045500 | -2.40065000  | 2.69503700 |
| C | 0.73024500  | -0.65082400  | 3.21766500 |
| C | 4.82484500  | -4.33923000  | 3.81607800 |
| C | 4.39243700  | -8.81832200  | 1.03918400 |
| C | -0.64058900 | -10.92707400 | 1.69697300 |



|    |             |              |            |
|----|-------------|--------------|------------|
| C  | -5.07617200 | -7.72645500  | 2.21807000 |
| H  | -5.03250000 | 0.93225600   | 2.91868600 |
| H  | -7.77264400 | -2.36609800  | 2.59343800 |
| H  | 3.40697000  | 1.44421000   | 3.33956300 |
| H  | -0.76993500 | 2.39331000   | 2.94158200 |
| H  | 8.02667500  | -5.43802300  | 4.13662800 |
| H  | 6.56631100  | -1.41543200  | 3.72982700 |
| H  | 5.22197200  | -12.11209500 | 1.19133200 |
| H  | 7.76400000  | -8.69128700  | 0.60430700 |
| H  | -3.05169400 | -13.31099800 | 1.98721700 |
| H  | 1.21412500  | -13.77851100 | 1.68295500 |
| H  | -8.34304700 | -6.87511500  | 2.64590000 |
| H  | -6.58300900 | -10.77905600 | 2.25625700 |
| H  | -3.53815500 | -3.09371800  | 2.61622200 |
| H  | 0.48503900  | -1.70748900  | 3.25586300 |
| H  | 3.80782500  | -4.71241600  | 3.75867200 |
| H  | 3.52911700  | -8.16374200  | 1.09825700 |
| H  | -0.53203500 | -9.84960400  | 1.62606100 |
| H  | -4.09769000 | -7.27693900  | 2.07181000 |
| C  | 6.74265200  | -11.38175300 | 4.31447700 |
| C  | 5.57656300  | -7.84986700  | 4.15750300 |
| C  | 5.67615200  | -6.64538600  | 4.06211100 |
| C  | 5.55452500  | -12.06152800 | 4.55324200 |
| C  | 4.34792100  | -11.35263000 | 4.65945600 |
| C  | 5.54422400  | -9.27746800  | 4.28091800 |
| C  | 6.74436200  | -9.99834200  | 4.18157600 |
| H  | 7.67369300  | -11.93262300 | 4.23173300 |
| C  | 4.34552100  | -9.96066000  | 4.51523200 |
| H  | 5.54800600  | -13.14032400 | 4.66703400 |
| H  | 7.66896800  | -9.46331300  | 3.99220200 |
| H  | 3.41279700  | -9.41124700  | 4.58737300 |
| C  | 3.13076500  | -12.05454500 | 4.95135900 |
| C  | 2.11385800  | -12.65900200 | 5.24133000 |
| Si | 0.57341400  | -13.54889200 | 5.75121500 |
| C  | 0.52738200  | -15.21850200 | 4.89393000 |
| C  | -0.88807800 | -12.46565200 | 5.29618400 |
| C  | 0.63732300  | -13.80897300 | 7.61112600 |
| H  | 1.34794900  | -15.85156200 | 5.24402000 |
| H  | 0.60896800  | -15.12076400 | 3.80906500 |
| H  | -0.41446900 | -15.72850100 | 5.12028100 |
| H  | -0.81907200 | -12.13071400 | 4.25791800 |
| H  | -0.92165500 | -11.58180300 | 5.94038300 |
| H  | -1.82846700 | -13.01267400 | 5.41755100 |
| H  | 0.70365400  | -12.85536200 | 8.14226500 |
| H  | 1.49735000  | -14.42171900 | 7.89547900 |
| H  | -0.26999400 | -14.32173000 | 7.94666200 |
| C  | 5.79927600  | -6.85225000  | 0.72237500 |
| C  | 5.85329300  | -5.64472900  | 0.63630900 |
| C  | 2.26351900  | -0.92852800  | 0.05949400 |

|   |             |              |             |
|---|-------------|--------------|-------------|
| C | 3.33007900  | -1.49159000  | 0.17108400  |
| C | 6.99247600  | -2.08700600  | 0.46209600  |
| C | 7.03292900  | -3.47457700  | 0.55278400  |
| C | 5.84401700  | -4.21812200  | 0.53208800  |
| C | 4.58531900  | -2.16170400  | 0.30588800  |
| C | 5.77723400  | -1.42359000  | 0.34284300  |
| H | 7.91627200  | -1.51835600  | 0.48386000  |
| C | 4.61891000  | -3.55518700  | 0.40470600  |
| H | 7.98134000  | -3.99179600  | 0.65297000  |
| H | 5.73923600  | -0.34235500  | 0.26374800  |
| H | 3.69507300  | -4.12427200  | 0.38031100  |
| C | -7.03209700 | -10.18367100 | -1.11111200 |
| C | 6.32082600  | -0.98462000  | -3.00589300 |
| C | 5.04294900  | -0.44784300  | -3.10940200 |
| C | 3.92479600  | -1.29682400  | -3.10993100 |
| C | 5.39257400  | -3.21645900  | -2.89480900 |
| C | 6.50231400  | -2.35951000  | -2.89905000 |
| H | 7.18330800  | -0.32670300  | -3.00244300 |
| C | 2.60129300  | -0.76210600  | -3.22141800 |
| C | 1.47496300  | -0.32573300  | -3.31997700 |
| C | -1.39257000 | 2.03737200   | -3.66196500 |
| C | -2.46606000 | 1.15431400   | -3.72240600 |
| C | -2.24315500 | -0.23012700  | -3.65706500 |
| C | 0.14121900  | 0.17966300   | -3.44610500 |
| C | -0.09291900 | 1.56135600   | -3.52472800 |
| H | -1.57016100 | 3.10556300   | -3.73355500 |
| C | -5.77981600 | -10.76875900 | -1.24198600 |
| C | -4.62613600 | -9.96757300  | -1.23804400 |
| C | -6.00970200 | -7.99637400  | -0.98614500 |
| C | -7.15453000 | -8.80312900  | -0.98891500 |
| H | -7.92142000 | -10.80565400 | -1.11764300 |
| C | -3.33743900 | -10.57680100 | -1.37504600 |
| C | -2.25765500 | -11.11777700 | -1.48046700 |
| C | 0.32917900  | -13.80253100 | -1.61319000 |
| C | 1.49414900  | -13.05765100 | -1.74940500 |
| C | 1.42762900  | -11.65621600 | -1.80777100 |
| C | -0.98655000 | -11.76920000 | -1.58068500 |
| C | -0.90736700 | -13.16913700 | -1.52981500 |
| H | 0.38328600  | -14.88558000 | -1.56628900 |
| C | 2.62105300  | -10.88333100 | -1.97360100 |
| C | 3.63012500  | -10.23240600 | -2.13543200 |
| C | 7.19472400  | -9.25705400  | -2.66039300 |
| C | 7.08831500  | -7.87306600  | -2.73265400 |
| C | 5.83224700  | -7.25831000  | -2.61075700 |
| C | 4.80539900  | -9.43874900  | -2.33213300 |
| C | 6.06394700  | -10.04290900 | -2.46389300 |
| H | 8.16745900  | -9.72768100  | -2.75716400 |
| C | 5.56689300  | -4.63373600  | -2.78673500 |
| C | 5.70138000  | -5.83506300  | -2.70115600 |

|   |             |              |             |
|---|-------------|--------------|-------------|
| C | 4.10412600  | -2.67909300  | -2.99835000 |
| C | -0.93674000 | -0.71155700  | -3.51356800 |
| C | -4.74181500 | -8.58189300  | -1.09990000 |
| C | 0.18673400  | -11.01662300 | -1.71663800 |
| C | 4.69546200  | -8.04549600  | -2.40505000 |
| H | 4.89805600  | 0.62393300   | -3.19312600 |
| H | 7.49818200  | -2.77981300  | -2.80826400 |
| H | -3.47912000 | 1.52554200   | -3.83327300 |
| H | 0.74672100  | 2.24748600   | -3.47845100 |
| H | -5.68022700 | -11.84293300 | -1.35954500 |
| H | -8.13148000 | -8.34092300  | -0.89194700 |
| H | 2.45965700  | -13.54732100 | -1.81800800 |
| H | -1.81881600 | -13.74616300 | -1.41038200 |
| H | 7.96860900  | -7.25893300  | -2.89006800 |
| H | 6.14506900  | -11.12283700 | -2.40120800 |
| H | 3.24104200  | -3.33619000  | -2.98615100 |
| H | -0.75874600 | -1.78089100  | -3.46753700 |
| H | -3.85327100 | -7.95860500  | -1.05434300 |
| H | 0.13245800  | -9.93380200  | -1.75168300 |
| H | 3.72398600  | -7.57494300  | -2.29774600 |
| C | -6.11908700 | -6.57333400  | -0.88396000 |
| C | -6.18787600 | -5.36496100  | -0.82259000 |
| C | -2.52273800 | -0.74832400  | -0.35993200 |
| C | -3.62073500 | -1.25002600  | -0.45986400 |
| C | -7.29451400 | -1.79017500  | -0.76650000 |
| C | -7.35023800 | -3.17978100  | -0.81952300 |
| C | -6.17143400 | -3.93598100  | -0.75100000 |
| C | -4.89274100 | -1.89089300  | -0.57429800 |
| C | -6.07253600 | -1.13746800  | -0.65420400 |
| H | -8.21120200 | -1.21196300  | -0.82041300 |
| C | -4.94005600 | -3.28710800  | -0.61250900 |
| H | -8.30346800 | -3.68731700  | -0.92518700 |
| H | -6.02208800 | -0.05436500  | -0.61692800 |
| H | -4.02499300 | -3.86168500  | -0.50074900 |
| C | -3.33879900 | -1.14753600  | -3.75439700 |
| C | -4.26470600 | -1.92370300  | -3.85170100 |
| C | -7.78978200 | -3.05791200  | -4.22662400 |
| C | -7.63661000 | -4.43795800  | -4.26409900 |
| C | -6.35761100 | -5.01103300  | -4.16558600 |
| C | -5.39752200 | -2.79176700  | -3.98255600 |
| C | -6.67974300 | -2.23267000  | -4.08918700 |
| H | -8.78046300 | -2.62222200  | -4.30289400 |
| C | -5.23980100 | -4.18310500  | -4.01848300 |
| H | -8.49934600 | -5.08651600  | -4.37360300 |
| H | -6.79292000 | -1.15444400  | -4.05311300 |
| H | -4.25041200 | -4.61847700  | -3.92753600 |
| C | -7.49497900 | -11.12249000 | -4.50972000 |
| C | -6.17900200 | -7.64628100  | -4.29787900 |
| C | -6.22530900 | -6.43695600  | -4.22586400 |

|    |             |              |             |
|----|-------------|--------------|-------------|
| C  | -6.32481700 | -11.85864800 | -4.65469800 |
| C  | -5.08193700 | -11.20767500 | -4.67877700 |
| C  | -6.20485000 | -9.07548600  | -4.40350300 |
| C  | -7.44171400 | -9.73945300  | -4.38973600 |
| H  | -8.45388400 | -11.62967200 | -4.49323400 |
| C  | -5.02542500 | -9.81552000  | -4.54309900 |
| H  | -6.36055300 | -12.93773200 | -4.76003800 |
| H  | -8.35203400 | -9.15967700  | -4.27821800 |
| H  | -4.06573600 | -9.30943900  | -4.55102700 |
| C  | -3.88515200 | -11.97300800 | -4.88694700 |
| C  | -2.89574500 | -12.64840400 | -5.10880200 |
| Si | -1.43428800 | -13.69163000 | -5.55783500 |
| C  | -1.52001400 | -15.29938400 | -4.59212100 |
| C  | 0.12801300  | -12.73211400 | -5.17154100 |
| C  | -1.53711200 | -14.05807500 | -7.39775700 |
| H  | -2.42514300 | -15.85837000 | -4.84575900 |
| H  | -1.51544600 | -15.12088400 | -3.51431300 |
| H  | -0.65524100 | -15.92479000 | -4.83643800 |
| H  | 0.14266300  | -12.41216300 | -4.12643600 |
| H  | 0.20310100  | -11.84361800 | -5.80533100 |
| H  | 1.01014400  | -13.35513400 | -5.35102800 |
| H  | -1.52350200 | -13.13663100 | -7.98615700 |
| H  | -2.45061200 | -14.60756500 | -7.64135200 |
| H  | -0.68175500 | -14.66914400 | -7.70352600 |
